# Supplementary material for: Dysregulation of MicroRNAs and PIWI-Interacting RNAs in a Caenorhabditis elegans Parkinson’s Disease Model Overexpressing Human α-Synuclein and Influence of tdp-1
Source: Front Neurosci. 2021 Mar 8;15:600462. doi: 10.3389/fnins.2021.600462 (PMC7982545; doi:10.3389/fnins.2021.600462)
Supplement: Supplementary file 6 [file Table_6.XLSX]

## Sheet: description of comparisons
name	description
Comparison 1	HASNA53T OX vs Wild type
Comparison 2	HASNWT OX vs Wild type
Comparison 3	Tdp-1 KO vs Wild type
Comparison 4	HASNA53T OX +tdp-1 KO vs HASNA53T OX
Comparison 5	HASNWT OX +tdp-1 KO vs HASNWT OX
Comparison 6	HASNA53T OX +tdp-1 KO vs Wild type
Comparison 7	HASNWT OX +tdp-1 KO vs Wild type
Comparison 8	HASNA53T OX vs HASNWT OX
Comparison 9	HASNA53T OX +tdp-1 KO vs HASNWT OX +tdp-1 KO
Comparison 10	HASNA53T OX vs Tdp-1 KO
Comparison 11	HASNWT OX vs Tdp-1 KO
Comparison 12	HASNA53T OX +tdp-1 KO vs Tdp-1 KO
Comparison 13	HASNWT OX +tdp-1 KO vs Tdp-1 KO

## Sheet: comparison 1
piRNA	logFC	logCPM	PValue	FDR	fc_sem_basedOnpseudo.counts	chr	startPos	endPos	strand	ID	Targets	Clash Supported Targets
21ur-6712	-2.01486	4.59768	6.33393e-07	0.00705727	0.239878606574416 ± 0.031678564538457	IV	6544393	6544413	-	21ur-6712	srh-92;oac-20;ugt-57;Y73B6A.1
21ur-5271	2.1492	4.84639	1.52027e-06	0.00846941	4.64614056847986 ± 0.503221714680973	IV	16103522	16103542	+	21ur-5271	dhp-1;set-2;srg-51;unc-70;mct-2;srbc-2;srbc-1;mct-1
21ur-4918	-1.34912	9.42782	2.65869e-06	0.00970046	0.393050240662855 ± 0.0224435334222763	IV	15764649	15764669	-	21ur-4918	Y22D7AR.2;cex-1;Y60A3A.25
21ur-8188	1.85454	5.30185	3.85727e-06	0.00970046	3.55993657939187 ± 0.208751662698139	IV	4875304	4875324	-	21ur-8188	acr-6;hap-1;nhr-2;nos-3;svh-5;tsn-1;aptf-4;T13H5.1;F58F9.4;T12E12.3
21ur-6628	1.70348	5.94642	6.10018e-06	0.00970046	3.27674159753379 ± 0.456357663929007	IV	15616640	15616660	-	21ur-6628	arf-3;him-6;lin-26;srx-3;dgk-4;unc-2;C06H2.7;kcnl-2;F30A10.12;chil-25;Y55D9A.2;B0218.5;C06G3.5;fbxc-18;fbxc-39;T01D1.4;T28C12.2;Y61A9LA.3;acp-6;sdz-34;ZK1127.3;H05L14.3
21ur-3897	1.70348	5.94642	6.10956e-06	0.00970046	3.27674159753379 ± 0.456357663929007	IV	15616639	15616659	-	21ur-3897	fmi-1;unc-2;kcnl-2;chil-25;fbxc-18;F48D6.4;fbxa-71;acp-6;sdz-34
21ur-2467	1.47819	7.30506	6.95369e-06	0.00970046	2.7633092476271 ± 0.167544211204359	IV	15829422	15829442	+	21ur-2467	ceh-31;dhs-23;gcy-8;gon-2;tank-1;ptr-1;sra-36;srb-1;srd-2;srh-147;srh-203;srj-42;vav-1;ant-1.2;C01G10.1;C01G12.5;C34B4.3;D2030.11;F17C11.12;F26C11.3;F57B1.6;T04F3.1;T24D1.3;Y38H6C.23;Y69H2.10;C18B10.6;C30A5.10;F26A1.7;irld-38;K02E10.7;M02D8.3;R05D8.9;R09A1.3;R11E3.2;T07A9.10;Y69F12A.1;C26D10.7;F23F12.13;C15B12.9	M02D8.3
21ur-8217	1.47818	7.30506	6.96497e-06	0.00970046	2.7633092476271 ± 0.167544211204359	IV	15829425	15829445	+	21ur-8217	cdh-4;dnj-1;dsl-2;ears-2;fat-4;lrp-2;mua-3;unc-68;C25F9.5;C34B4.3;D1054.9;F17H10.4;F56F3.4;hpo-13;C01B10.8;C01G5.9;mcp-1;F07F6.1;clec-7;F21D12.3;ets-4;cla-1;lin-42;ccpp-1;M03E7.3;T10H10.2;Y48G1C.6;mrpl-45;Y75B8A.39;Y20F4.8;F11A5.17
21ur-2511	-1.53089	5.81447	9.41076e-06	0.0111283	0.338996361231182 ± 0.0230943199591246	IV	6181237	6181257	-	21ur-2511	gta-1;nhx-8;ocr-1;mdt-30;F28H6.6;fbxb-8;F28C10.3;egg-5;R119.5;egg-4;cdh-12;Y41E3.18
21ur-434	1.44569	7.21356	9.98771e-06	0.0111283	2.68133185857685 ± 0.222314142190821	IV	15384654	15384674	-	21ur-434	K10G9.2;cht-3;acr-23;dnj-12;mec-4;mdt-17;D1081.6;F26F2.1;fdps-1;glb-29;gad-3;F15E6.6;che-10;thoc-1;T20B12.3;T27A10.6;fbxa-66	dnj-12
21ur-12093	-1.85526	4.76983	1.30601e-05	0.0115811	0.288407623637861 ± 0.0509836534472956	IV	4848466	4848486	-	21ur-12093	adt-2;daf-10;nlp-25;pde-3;F22D6.9;lgc-18;F56D6.12
21ur-11367	-1.85525	4.76983	1.30754e-05	0.0115811	0.288407623637861 ± 0.0509836534472956	IV	4848467	4848487	-	21ur-11367	ckb-1;pyr-1;ttn-1;pde-3;F47G4.5;T21B10.3;ZC443.2
21ur-4951	2.00184	4.25839	1.45236e-05	0.0115811	4.90907542211329 ± 0.374187515678178	IV	13828642	13828662	+	21ur-4951	cut-6;nlg-1;ppm-1;pnk-4;clec-225;C34B7.1;F35E12.6;fbxa-118;T01D3.1;C06E4.6;C48E7.6;nep-6;clec-90	clec-90
21ur-6141	-1.50823	5.85242	1.45518e-05	0.0115811	0.337344689449366 ± 0.053937731248616	IV	6083113	6083133	+	21ur-6141	gbh-1;klp-6;mec-4;nsy-1;twk-2;F31C3.3;R07D5.2;T14G8.3;Y70G10A.2;ttr-35;sulp-3;T05E7.4
21ur-10275	1.51117	6.8422	1.76961e-05	0.0116113	2.82722155889743 ± 0.455330584283653	IV	17048491	17048511	-	21ur-10275	srd-50;vha-7;nkcc-1;clec-52;C44E4.5;fbxc-19
21ur-7482	1.51117	6.8422	1.77061e-05	0.0116113	2.82722155889743 ± 0.455330584283653	IV	17048494	17048514	-	21ur-7482	che-6;egl-2;emb-9;sqv-5;lmtr-3;tbc-8;uggt-2;C15F1.2;F15E6.5;F20A1.10;sdz-24
21ur-1517	1.51117	6.8422	1.7716e-05	0.0116113	2.82722155889743 ± 0.455330584283653	IV	17048495	17048515	-	21ur-1517	sqv-5;dkf-2
21ur-10963	2.11043	5.70515	2.12989e-05	0.0125126	4.01855407864788 ± 0.7551125365558	IV	14311877	14311897	-	21ur-10963	gop-1;unc-112;fbxa-185;Y32F6A.5;spin-4;C15C7.7;F48C1.6;K10C2.7;ZC308.4;pdhk-2;sre-46
21ur-4854	2.11039	5.70515	2.13373e-05	0.0125126	4.01855407864788 ± 0.7551125365558	IV	14311876	14311896	-	21ur-4854	gop-1;rps-2;srh-2;str-10;F31C3.3;F55D12.5;Y32F6A.5;erp-44.2;lonp-1;D1014.6;F48C1.6;F53A10.2;K10C2.7;srz-69;sre-46
21ur-3483	1.68841	5.32919	2.70962e-05	0.013899	3.23148899447334 ± 0.480826841214604	IV	16581998	16582018	-	21ur-3483	fkh-3;fli-1;gfi-1;AC3.5;glna-2;F33H1.4;F44E5.4;F44E5.5;T08A11.1;slc-17.4;sre-47;gcn-2;B0511.12;C06G3.8;C28H8.7;C35E7.6;lst-6;E02D9.1;fbxb-6;F25E5.1;F35H12.6;F57F4.4
21ur-10848	2.01952	5.44631	2.72625e-05	0.013899	4.15002293308283 ± 1.18049238869454	IV	16014934	16014954	-	21ur-10848	bbs-2;cdh-4;cft-1;flp-19;gcy-11;grl-1;grl-3;isw-1;lem-3;let-268;let-526;lrp-1;mom-4;pek-1;pik-1;pld-1;ptr-4;rps-23;sax-2;skr-7;skr-10;sma-2;sra-12;srh-48;sue-1;dgk-4;twk-32;unc-76;C01G10.9;C05D12.2;C15C6.4;C23H4.6;C25G4.7;csa-1;F19C6.4;F21G4.6;F33H1.4;oac-19;F39B2.8;F40G12.11;F44F1.4;hecw-1;fbxa-134;F49C12.9;F53B6.7;F56D5.9;rde-12;set-14;T28C6.7;T28D6.5;W02B8.2;dkf-1;Y6D1A.2;nmy-3;fbxa-107;Y38H6C…
21ur-3753	-1.56808	5.39935	3.16921e-05	0.013899	0.341144087719155 ± 0.0193852162704591	IV	5053075	5053095	+	21ur-3753	acy-1;atl-1;cyp-13A7;chs-2;cpi-1;col-167;dnj-8;fkb-7;hum-7;ida-1;inx-1;kin-15;kup-1;lim-4;lpd-3;mog-5;nas-16;dcap-2;nhr-43;nhr-115;nlr-1;nmy-2;npp-6;pan-1;plc-1;ptrn-1;pqn-41;prp-21;swsn-1;ptr-13;ptr-23;rde-1;rol-3;rrf-2;sma-9;srh-7;srh-118;srh-120;sru-11;sru-36;srw-85;srx-129;sym-1;trt-1;twk-13;unc-31;unc-82;xtr-2;B0198.2;C01G6.5;lmtr-3;set-3;C09G1.2;C11H1.5;C13C4.6;C14C10.2;C14C10.5;nrx-1;C34F6…
21ur-12417	-1.56808	5.39935	3.16955e-05	0.013899	0.341144087719155 ± 0.0193852162704591	IV	5053078	5053098	+	21ur-12417	W02B12.12;F31F7.1
21ur-11806	1.53277	5.94752	3.23384e-05	0.013899	2.85317636262923 ± 0.336294787685117	IV	16098295	16098315	-	21ur-11806	atl-1;atm-1;ect-2;pgp-1;zipt-13;C31E10.5;C31H5.6;cfp-1;aakb-1;K03A11.1;R90.1;vps-39;sld-5;ZC376.6;cpna-2;C14A11.5;C36B7.2;akap-1;cutl-29;F46F11.1;F48E3.2;K04A8.1;K11D12.6;nekl-1
21ur-295	1.53277	5.94752	3.23621e-05	0.013899	2.85317636262923 ± 0.336294787685117	IV	16098296	16098316	-	21ur-295	bbs-2;dsl-1;ggr-2;grd-9;xpo-3;pgp-1;C50H2.4;srz-18;F54F7.3;cpna-2;C53A3.1;insc-1;K11D12.6;nekl-1;Y20F4.8
21ur-11763	1.53277	5.94752	3.24335e-05	0.013899	2.85317636262923 ± 0.336294787685117	IV	16098299	16098319	-	21ur-11763	abt-4;bli-3;daf-18;nhx-8;sra-37;tln-1;D1053.4;srt-55;B0041.5;F11G11.5;ugt-42;fbxb-83;nekl-1;gbb-2
21ur-5965	1.56726	9.02269	3.61367e-05	0.0143893	2.94177296327777 ± 0.571933220393731	IV	16319306	16319326	+	21ur-5965	clc-5;dpy-11;fmo-5;rpl-18;srh-11;tsp-7;srt-7;lron-15;Y34F4.4;madf-9
21ur-6236	1.56726	9.02269	3.61605e-05	0.0143893	2.94177296327777 ± 0.571933220393731	IV	16319309	16319329	+	21ur-6236	gei-3;mask-1;F55A12.2;K07H8.5;syx-16
21ur-1682	3.82732	3.02549	3.88963e-05	0.0149442	23.6953041535777 ± 3.44609356855776	IV	15613706	15613726	-	21ur-1682	cyk-3;srh-24;mltn-13;mps-2;K01A2.9;T24C4.3;K01A2.12;sgn-1;T24B1.1;Y66D12A.9
21ur-12509	1.3577	10.5446	4.54998e-05	0.016021	2.55845017651518 ± 0.587579458189742	IV	14647011	14647031	-	21ur-12509	eat-3;eif-3.E;let-92;srh-85;srw-41;str-118;F14D7.6;T27F6.8;C04E7.4;C05D10.4;H20J04.7;K12H6.12;srbc-67;Y71H2B.2;cpsf-1;T06E4.14;F17C8.9;C53A5.17
21ur-4411	1.3577	10.5446	4.56028e-05	0.016021	2.55845017651518 ± 0.587579458189742	IV	14647014	14647034	-	21ur-4411	csq-1;grl-15;let-502;ptd-2;spp-18;srh-174;C06B8.3;folt-1;F02A9.4;F26A3.4;F43G6.8;T07G12.2;T07G12.4;T16G12.3;Y106G6G.2;F41C3.8;F58F6.6;nep-2;ZC196.9;F38G1.3
21ur-11063	1.75614	5.11332	4.60126e-05	0.016021	3.60229077822548 ± 0.411949040142241	IV	5600018	5600038	-	21ur-11063	C12D12.3;Y48G8AL.10
21ur-1412	1.86318	4.56952	6.80725e-05	0.0223628	3.57735912181714 ± 0.282578265059074	IV	15122730	15122750	-	21ur-1412	adt-2;alh-4;apd-3;apb-3;atf-2;bar-1;ceh-44;chd-3;clp-3;col-142;col-150;cyk-3;cyn-15;dnj-12;dop-2;dpy-27;egl-45;eif-3.G;evl-14;fli-1;gei-14;hcp-6;hlh-14;hpr-9;ida-1;ina-1;lam-1;let-716;lin-3;lin-59;mdt-6;mel-11;mut-16;nas-6;nca-2;odr-4;pqn-15;swsn-4;ptr-6;ran-2;rbd-1;rde-1;ref-1;ret-1;sax-3;srh-203;sri-74;sup-17;taf-8;tag-4;itsn-1;lim-9;nlg-1;ttn-1;tag-131;tag-153;unc-84;vab-8;xnp-1;zyg-1;utp-20;B…
21ur-12697	1.86316	4.56952	6.82404e-05	0.0223628	3.57735912181714 ± 0.282578265059074	IV	15122727	15122747	-	21ur-12697	unc-89;B0462.4;C27C12.3;C56A3.5;H21P03.2;miz-1;T09B9.5;dct-16;ztf-22;C01B10.3;C18H2.1;C50F7.5;F07C3.3;attf-5;T14B4.1;flp-28
21ur-6108	1.47482	5.69474	7.2741e-05	0.022915	2.7455111453671 ± 0.281883497995339	IV	16583375	16583395	-	21ur-6108	cul-4;hyl-1;mrp-2;pqn-15;tre-2;pals-4;F46B3.15;R05H5.4;Y57G11C.9;C09E7.8;M03D4.4
21ur-32	1.29586	8.032	7.40388e-05	0.022915	2.4694351829839 ± 0.432339411485673	IV	14734214	14734234	+	21ur-32	srv-15;srx-4;trp-1;prx-10;T10G3.4;Y39B6A.30;srxa-15;Y53C12B.1;Y71A12B.12;C05D11.1;stn-2;cht-1;nhr-90;nhr-134;syd-2;wrt-1;btb-14;B0207.1;clec-175
21ur-4574	-1.97119	3.84437	7.75213e-05	0.0233444	0.26015586078191 ± 0.0294731245951564	IV	14604654	14604674	+	21ur-4574	dml-1
21ur-8287	1.81093	5.76305	8.88313e-05	0.0257574	3.41775490564742 ± 0.929268958104314	IV	5039652	5039672	-	21ur-8287	str-14;nduo-4;F36A4.5
21ur-7086	-1.19025	8.53751	9.01578e-05	0.0257574	0.438383333462087 ± 0.0325821935018446	IV	6561489	6561509	+	21ur-7086	gcy-25;nhr-133;F09C6.10;nhr-185;F56D2.5;ZK370.4
21ur-3696	-1.5967	5.42181	0.000105357	0.0293473	0.350081419978149 ± 0.0785935568202434	IV	5212725	5212745	+	21ur-3696	ceh-40;clp-4;fkb-8;gln-1;gln-5;lin-49;rde-1;alg-4;xnp-1;tag-325;C47F8.3;F14H8.4;ash-2;Y38E10A.3;afmd-2;Y116F11A.1;efr-3;F22H10.1;hmbx-1;F59B1.10;fbxc-24;Y110A2AL.1;set-18;bus-18;folt-3;hch-1;rme-6;ufd-3;R05D11.9;clec-29;irld-56;ZC376.6;ZK849.6;sgca-1;fpn-1.2;lfi-1;ZK6.8;tag-241
21ur-2584	1.34012	11.0224	0.000124749	0.0339014	2.5268968113659 ± 0.529358762454826	IV	13762282	13762302	-	21ur-2584	R09E10.5;folt-3
21ur-6009	1.44566	8.05459	0.000129709	0.03441	2.6868746681629 ± 0.478643306283812	IV	14667793	14667813	+	21ur-6009	div-1;gcy-15;gcy-18;gcy-21;let-805;mrp-1;pcp-1;pgl-1;pqn-41;spo-11;sra-21;srj-21;unc-44;trpp-9;scl-24;F53F8.3;capg-2;chd-1;fbxa-197;T23G7.3;T28C6.8;lron-10;Y39B6A.30;Y43F8B.12;sinh-1;scrm-3;tsg-101;flh-2;C50D2.5;C56C10.9;C56C10.11;bath-27;irld-29;dip-2;F28F9.2;hda-6;clec-78;aagr-4;F59E12.3;H10E21.4;irld-40;K08F11.1;Y50D4A.4;ZK688.5;cpsf-4;ZC21.10;W03D8.11;T27F7.4;che-3;ckk-1;dyf-1;fut-8;gck-1;gst…	C50F4.6;Y51H7C.7
21ur-3600	-1.56711	4.80246	0.000151999	0.0384996	0.338976401933638 ± 0.0295417128798313	IV	5838088	5838108	+	21ur-3600	clr-1;fog-2;lev-1;ssq-2;cpna-1;unc-32;W04E12.5;F15E6.9;fbxc-27;Y50D4B.1;slc-17.1;K08D9.9;eif-3.B;srh-287;srx-96;C11H1.3;K08H2.5;W02B12.1
21ur-14896	-1.56711	4.80246	0.000152036	0.0384996	0.338976401933638 ± 0.0295417128798313	IV	5838089	5838109	+	21ur-14896	bre-2;eif-3.B;srg-9;srh-287;B0432.1;Y46D2A.2
21ur-15588	-1.77654	6.24128	0.000200819	0.04962	0.29397397382415 ± 0.0318230668661558	IV	2388245	2388265	+	21ur-15588	bar-1;mca-3;str-135;C47E12.12;usp-48;pole-1;chd-1;sipa-1;Y46G5A.8;C29H12.2;F18E9.3;F44A2.3;wdr-12;Y38F2AR.9
21ur-12388	-1.46902	5.3564	0.000204857	0.04962	0.365489878819617 ± 0.0450528924205632	IV	5515917	5515937	-	21ur-12388	dur-1;kin-16;let-381;tre-5;Y49A3A.3;thoc-2;D2096.7;F14D2.8
21ur-8010	3.03099	3.0938	0.000222785	0.0508429	10.4786800374503 ± 1.77522308565364	IV	16013979	16013999	-	21ur-8010	col-20;sid-1;srh-95;str-94;unc-89;ugt-44;pfas-1;ain-1;F39C12.1;sdz-18;tag-234;K05F6.4;aagr-2;T23B12.5;ZK380.4;F23D12.10;C09B9.85
21ur-12421	3.03098	3.0938	0.000222834	0.0508429	10.4786800374503 ± 1.77522308565364	IV	16013978	16013998	-	21ur-12421	col-20;gex-3;parg-1;sid-1;smf-2;srh-95;str-94;unc-40;wdfy-3;srbc-82;C47E12.3;pfas-1;C39D10.7;F41G3.6;tag-234;K05F6.4;ZK1248.15;C09B9.85
21ur-6250	1.91708	4.90285	0.000227816	0.0508429	3.4511143834035 ± 0.464818422114269	IV	15605264	15605284	+	21ur-6250	col-84;let-363;nlp-11;ppt-1;srg-16;sul-2;twk-22;scav-6;ctf-4;F21D5.6;R01H10.7;T26E4.4;W08G11.1;Y39B6A.10;sup-35;Y53F4B.20;Y54G9A.7;C06A5.3;C24A1.3;C49A9.3;dip-2;F41C3.6;cct-3;irld-42;glb-25;sftb-2;Y4C6B.3;set-29;Y6G8.9;dyb-1;E01G6.3;vacl-14;K08D8.5;fbxb-104;droe-8	vacl-14
21ur-13528	1.91705	4.90285	0.000228159	0.0508429	3.4511143834035 ± 0.464818422114269	IV	15605261	15605281	+	21ur-13528	acr-8;cnt-2;cpb-1;dyb-1;sel-11;F13H10.3;F54D5.9;sre-4;C28C12.12;E_BE45912.2;bmy-1;H12I13.3;W04C9.6;fbxb-104;cosa-1
21ur-10700	-1.20026	6.0509	0.000253182	0.0525813	0.439712611858713 ± 0.0239859507621125	IV	15548862	15548882	+	21ur-10700	aex-5;dpy-21;dys-1;nhr-71;ptr-14;F36G3.1;F49C12.15;M28.2;ztf-6;gcl-1;B0361.3;C23H3.9;F59B1.8;F59B1.10;Y48G8AL.5;nol-6;eel-1
21ur-1574	1.48421	5.80605	0.000261901	0.0525813	2.73618134398802 ± 0.567950666857536	IV	15548953	15548973	-	21ur-1574	asp-1;grd-14;let-363;nas-17;pyr-1;srv-13;B0024.15;pfas-1;F18C12.3;aptf-4;scl-18;Y57G11B.5;ZK930.7;srbc-23;F59E12.9;helq-1;Y119D3B.14;irld-63;Y26D4A.21;K12B6.4;M70.4
21ur-226	1.02045	9.78089	0.000263853	0.0525813	2.02572140833517 ± 0.160058411267587	IV	16104089	16104109	+	21ur-226	lin-7;lin-49;mua-3;F47B10.5;nhr-199
21ur-8148	1.02045	9.78089	0.00026467	0.0525813	2.02572140833517 ± 0.160058411267587	IV	16104076	16104096	-	21ur-8148	mat-3;ocrl-1;pot-2;T01G5.7;ntl-11;nop-1;otpl-7;fbxb-84;oig-8
21ur-445	1.21723	6.77702	0.00027028	0.0525813	2.27915571442837 ± 0.233766786670726	IV	15987816	15987836	-	21ur-445	snt-1;acy-2;anc-1;bli-1;dif-1;eat-5;emb-9;grl-18;npp-19;ran-2;rec-1;san-1;spg-7;syx-5;tag-153;unc-41;unc-79;unc-82;xrn-2;chil-6;pals-8;cpt-5;ceh-89;idhg-1;cdr-6;R102.4;T19A6.4;Y37D8A.4;Y53F4B.18;Y105E8A.25;chil-9;C01B10.9;C30A5.4;hmgs-1;acdh-9;F55F10.1;abts-3;H24K24.3;K07C11.4;moa-1;T15B7.8;pqbp-1.1;del-10;W03F9.4;ZC53.4	H24K24.3
21ur-1581	1.21792	6.57635	0.000273569	0.0525813	2.28285021416491 ± 0.102544665530476	IV	14372539	14372559	+	21ur-1581	brf-1;fli-1;hen-1;srw-8;str-119;wrt-8;snpc-1.1;C06G1.1;nhr-257;epg-5;sec-3;F53C3.8;F54D10.3;Y45G12C.10;dmsr-11;T03G11.9	snpc-1.1
21ur-10292	-3.20189	3.07838	0.000275763	0.0525813	0.090948350111264 ± 0.0417391228648564	IV	6435554	6435574	+	21ur-10292	NA	NA
21ur-10487	2.12672	4.56361	0.000293797	0.0525813	4.02694817628446 ± 0.949056806399527	IV	14459108	14459128	-	21ur-10487	col-91;gsk-3;ppm-1;tpa-1;C08F11.13;rtel-1;ztf-11;nphp-4;C14C6.6;M02D8.5;Y102A11A.3;ZK1236.1
21ur-14418	-1.55135	4.26188	0.000303278	0.0525813	0.334505077139471 ± 0.0342300039511656	IV	4944995	4945015	+	21ur-14418	bli-4;gars-1;ptc-1;C09G9.3;K06A9.2;Y69A2AR.12
21ur-10900	-1.55136	4.26188	0.000303803	0.0525813	0.334505077139471 ± 0.0342300039511656	IV	4944994	4945014	+	21ur-10900	lmd-4
21ur-13024	-1.55137	4.26188	0.000304337	0.0525813	0.334505077139471 ± 0.0342300039511656	IV	4944991	4945011	+	21ur-13024	nhr-95;src-1;C07A12.7;fbxa-80;T02G6.11
21ur-14065	-1.55137	4.26188	0.000304672	0.0525813	0.334505077139471 ± 0.0342300039511656	IV	4944990	4945010	+	21ur-14065	nhr-95;src-1;F13H8.3;fbxa-80
21ur-7052	1.89711	4.45365	0.000309	0.0525813	3.47437786237307 ± 0.359577141227133	IV	14889854	14889874	+	21ur-7052	atm-1;bli-4;bra-1;ceh-23;col-76;dhs-4;dur-1;exp-2;gei-4;grd-10;hcp-6;let-4;lin-3;mrp-2;ncx-1;rsd-6;srw-107;uev-3;unc-68;unc-82;vit-6;D2005.4;chw-1;F35G12.7;F38H4.4;F56A12.2;fecl-1;R03G8.4;T05G5.4;fbxa-104;T07D4.2;mlt-11;Y39B6A.18;Y48A6C.4;arrd-16;nsun-5;Y69H2.7;rbm-12;B0207.5;math-4;srxa-5;viln-1;C18F10.2;C33E10.6;ipla-4;F22F7.2;hda-6;athp-2;R05F9.7;T24E12.10;T28D9.9;Y37F4.1;Y71G12B.17;Y73C8C.3;Z…
21ur-9109	1.89704	4.45365	0.000310653	0.0525813	3.47437786237307 ± 0.359577141227133	IV	14889855	14889875	+	21ur-9109	baf-1;sra-36;sul-1;unc-75;glb-3;igdb-2;C50B6.3;F25F2.1;bath-45;F32H5.4;C18F10.2;hecd-1;F39C12.1;T04D1.2;Y18H1A.15;atm-1;exp-2;let-4;lin-3;nhr-94;rsd-6;tph-1;tsp-11;frpr-5;fecl-1;R06F6.8;fbxa-104;Y69H2.7;cpna-2;viln-1;C18E3.1;C33E10.6;ipla-4;F22F7.2;hda-6;T28D9.9;Y71G12B.17;ZC581.9;ZK354.2;best-24
21ur-9218	2.06314	3.7924	0.000316362	0.0525813	5.44055225128182 ± 0.543014917759972	IV	14536542	14536562	+	21ur-9218	ego-2;hil-8;pgp-14;sms-1;srh-204;sri-54;str-158;twk-43;F58D5.5;fbxa-102;pges-2;dcaf-1;srsx-34;lgc-5;lgc-6;rgl-1;sumv-2;ani-2;K10B4.3;K10G4.10
21ur-13759	2.06321	3.7924	0.000317125	0.0525813	5.44055225128182 ± 0.543014917759972	IV	14536541	14536561	+	21ur-13759	ccg-1;dhs-28;lev-9;lin-31;map-2;nhr-44;snf-2;str-158;mlcd-1;F52D10.4;F58D5.5;pges-2;Y37H9A.3;sinh-1;dcaf-1;srt-27;srsx-34;rabn-5;lgc-5;lgc-6;rgl-1;ani-2;T21E3.2
21ur-6780	2.06322	3.7924	0.000317281	0.0525813	5.44055225128182 ± 0.543014917759972	IV	14536539	14536559	+	21ur-6780	fbf-1;fbf-2;rho-1;scd-2;srh-38;sri-71;str-158;wht-6;lron-3;F54B3.1;sta-2;scl-18;srz-91;Y44A6C.2;Y46G5A.35;B0361.4;kcnl-3;C17C3.1;mrps-26;del-7;F56D1.1;M02D8.5;M02D8.6;dct-11;Y52D5A.2;tyr-6;fbxa-208;fbxa-77;F48E8.8;K01A12.4;M01H9.10
21ur-6723	1.55392	5.65694	0.000324778	0.0525813	2.87111079284842 ± 0.729204087475804	IV	16690830	16690850	-	21ur-6723	cca-1;col-36;cpb-1;daf-9;daf-15;ego-1;klp-7;lin-41;nhr-112;pmk-1;ppw-1;srh-72;str-23;ver-4;vha-7;oac-5;E01G6.1;F33E2.4;F49B2.6;K08C7.6;K10C3.5;T16G1.5;W02B12.10;tbc-9;Y48B6A.13;lin-38;Y87G2A.13;hex-2;met-1;fbxc-5;fbxc-4;fbxc-2;fbxc-1;nmur-1;aagr-1;F07E5.9;F18G5.5;nol-10;cla-1;F48A9.1;F49D11.4;oef-1;sago-2;fbxc-3;sacy-1;K11G12.6;R02F2.9;R10F2.6;R151.8;T02G5.3;sgnh-1;set-20;ppgn-1;eel-1;Y73B6A.1;pr…
21ur-9652	-1.51593	4.27643	0.000329799	0.0525813	0.315166691754885 ± 0.1049844052941	IV	6489352	6489372	-	21ur-9652	Y67A10A.2
21ur-5499	5.54636	2.65912	0.000330344	0.0525813	117942327533834816 ± 38751277825213688	IV	6203345	6203365	+	21ur-5499	adm-4;ubc-24;npr-3;Y73B6BL.29
21ur-6689	-1.15579	6.35854	0.000336157	0.052753	0.453896657844664 ± 0.0471556721548733	IV	6802157	6802177	-	21ur-6689	let-19;rde-4;M163.1;eea-1;T18D3.6;C44E4.5;hmbx-1;sumv-2;let-355;hgap-1
21ur-6714	-1.21274	6.78326	0.000389954	0.0603454	0.439482599077781 ± 0.0382281377443371	IV	14669529	14669549	+	21ur-6714	ced-5;C08G9.2;F48E8.4;K11D12.12;egg-2;Y97E10B.1
21ur-6816	-1.52277	5.3094	0.000445219	0.0678082	0.356267947928191 ± 0.0133607680967743	IV	5425479	5425499	+	21ur-6816	cmk-1;ctn-1;mars-1;rbr-2;rnf-5;sng-1;sru-35;F35G12.7;mnk-1;pde-1;acs-1;T05A8.5;tpxl-1
21ur-8060	1.22178	7.36889	0.000456368	0.0678082	2.294597624188 ± 0.279502213258975	IV	14999882	14999902	+	21ur-8060	ketn-1;C32F10.8;set-15;Y70C5A.3;pgl-2;rme-4;twk-7;ugt-2;rpb-3;C51E3.10;F14B6.2;rbpl-1;M05B5.1;T13H5.8;T16G1.5;jun-1;W08G11.5;C24D10.5;C49A9.6;CC8.2;rpc-2;F25G6.1;igcm-1;F56F4.4;osg-1;npr-31;Y49F6B.8;T26H5.10
21ur-4085	1.22177	7.36889	0.000456437	0.0678082	2.294597624188 ± 0.279502213258975	IV	14999879	14999899	+	21ur-4085	dpy-26;lec-3;mec-10;ugt-2;T01D3.6;F26A1.3;F41H10.4;M02D8.5;lgc-50;fbxb-14;W08F4.12;Y9C9A.13;Y97E10B.1
21ur-4571	1.22893	6.03335	0.000477827	0.0700519	2.32011787583335 ± 0.126354807856526	IV	15580428	15580448	-	21ur-4571	coh-1;pef-1;pri-1;rpl-37;srw-121;srw-123;str-64;unc-80;unc-105;C05D12.2;tiar-3;gls-1;F32B6.4;ttr-2;T24B8.7;clec-104;scav-2;C45G9.2;akap-1;F37B4.10;F49E7.2;igcm-2;T05C3.2;afd-1;comt-4;Y59E9AL.4;ZK652.8;rnh-1.1;ZK783.6
21ur-10437	1.10296	10.8688	0.000528715	0.0747404	2.14701942454421 ± 0.439131145301199	IV	16833227	16833247	+	21ur-10437	dpy-10;gly-3;sma-1;taf-7.2;ceh-57;ule-4;F15D3.6;nra-2;fbxa-50;ZC84.1;C05D11.9;glb-9;C42C1.9;aff-1;C46A5.4;F53B1.2;fbxa-24;T26C12.3;W10C4.1;Y65B4A.6;Y54G2A.7;ZK418.11;T27A8.7
21ur-5935	1.1018	10.8775	0.000532845	0.0747404	2.14527434257898 ± 0.437986953373573	IV	16833248	16833268	-	21ur-5935	mec-6;F57B1.5;anp-1;clec-61
21ur-7144	1.1018	10.8775	0.000533256	0.0747404	2.14527434257898 ± 0.437986953373573	IV	16833249	16833269	-	21ur-7144	icl-1;F57B1.5;clec-61;F20H11.1;F59E12.8;ZK973.1
21ur-2325	-1.14987	6.34303	0.000536639	0.0747404	0.457974496418911 ± 0.0296037962124059	IV	15666732	15666752	-	21ur-2325	ptc-2;octr-1;chup-1;T08G11.3;cif-1
21ur-1824	-1.5783	4.03077	0.000555825	0.075604	0.320994893687482 ± 0.0535649040766982	IV	4960014	4960034	-	21ur-1824	dlk-1;C36B1.9;F26H11.4;mtcu-1;nsun-5;math-3;F25E5.8;cgt-3;esyt-2;W02B3.4;cng-1;lep-2;sdc-3;sri-26;ZC376.2
21ur-13918	-1.5783	4.03077	0.000556411	0.075604	0.320994893687482 ± 0.0535649040766982	IV	4960015	4960035	-	21ur-13918	cng-1;sra-33;lron-14;ZC376.2;ttr-33
21ur-839	1.49009	5.2937	0.000569931	0.076508	2.64491525570707 ± 0.335062820551129	IV	15845457	15845477	-	21ur-839	srg-28;sars-2;taf-1;ttn-1;ubc-8;D2030.11;F19B2.5;F55A11.4;T05D4.5;ztf-22;sfa-1;rha-2;C24H12.4;F09E5.11;clec-180;F53G12.8;dop-3;Y57G7A.5;syx-16;Y41E3.18;acy-1;cbp-1;cyn-16;msh-6;pat-3;pyc-1;mrck-1;C06B8.2;C07A9.5;C17D12.3;ehbp-1;F33H1.4;K07F5.14;R07B7.10;T04F3.1;T13H5.8;Y47H9A.1;sinh-1;B0496.6;C28C12.12;C42C1.13;C50D2.6;E02C12.6;F37A4.4;F46C8.1;R02F11.4;set-15;T01B10.5;Y34B4A.8;josd-1;F59A6.12
21ur-2781	-1.04569	7.22397	0.000594912	0.0789109	0.479325588137538 ± 0.0279409227917594	IV	5716933	5716953	-	21ur-2781	cal-3;gcy-17;snpc-4;msh-2;nhr-77;pek-1;rme-8;sgn-1;tpi-1;catp-8;C15A11.4;nhr-169;nhr-174;F21D5.3;T05C12.4;Y116A8C.11;nhr-229;lmp-2;C08A9.6;C08A9.8;C50C3.2;D2096.10;F22F4.4;F58E2.3;K04F1.8;R11G1.1;moa-1;T10B5.3;dhod-1;polq-1;toe-1;F44E5.15;gst-29;imb-2;let-721;mpk-1;mrp-4;pat-9;srh-57;srh-244;srh-305;sss-1;str-56;C01G6.3;C03A3.2;npp-23;F10A3.4;rpb-12;F48F7.5;F54B8.4;bgnt-1.6;F59F4.3;H12D21.10;K06A…
21ur-6405	1.10201	10.1512	0.000612368	0.0802707	2.13993067685217 ± 0.390809419604794	IV	15326727	15326747	-	21ur-6405	che-3;chs-2;fmo-1;srh-231;C01G10.10;C14H10.3;F13D2.1;W09G3.1;slc-17.3;C15B12.1;C49A9.9;srt-16;E02H9.3;fbxc-54;R03H10.6;Y73C8C.3;unc-5;irg-4;H40L08.3;alg-3;T24B8.4;bath-36;Y105E8A.3;ugt-51;K09F6.7;F44E5.15
21ur-9473	-1.34956	4.93627	0.000646841	0.0838035	0.405922115146821 ± 0.0702732771564114	IV	6302709	6302729	-	21ur-9473	ced-3;dcr-1;gly-18;lec-4;unc-52;D1086.8;uggt-2;F44F1.3;F59F5.7;mrps-34;Y32B12B.4;lgc-55
21ur-4755	1.19179	5.73513	0.000667133	0.0844712	2.31131606722662 ± 0.216834499234591	IV	13840374	13840394	-	21ur-4755	cap-2;cku-70;eff-1;xpo-2;npr-2;num-1;spe-41;srd-32;sre-1;srj-44;sru-4;str-116;syd-2;unc-89;zig-8;C14A6.5;exo-1;ttr-12;sre-31;mct-3;nduo-4;R03D7.5;T02E1.6;tgn-38;T26H5.8;nhr-232;ZK809.8;inst-1;pdfr-1;srbc-8;clec-266;meg-4;C52E2.4;attf-3;mboa-6;sgnh-1;math-42;Y18H1A.9;ekl-7;lgc-33;ZK1240.1;C26D10.7;F58G6.9;R05C11.4
21ur-2892	1.19179	5.73513	0.000667157	0.0844712	2.31131606722662 ± 0.216834499234591	IV	13840377	13840397	-	21ur-2892	hmr-1;srb-5;srh-275;srj-1;sfxn-1.1;C14A6.5;C48B4.7;F13G3.3;mltn-9;idhg-1;F38A1.11;exo-1;F49E2.5;F55G11.1;T02E1.6;clec-144;Y45F3A.4;Y45F10C.1;cutl-10;faah-4;meg-4;lgc-22;fgt-1;ttr-48;ZK185.5
21ur-5217	-1.39424	5.62227	0.000701387	0.0878073	0.381029720469837 ± 0.0596410500327358	IV	15763871	15763891	-	21ur-5217	puf-3;C47E12.11;C56A3.6;C52B9.4;Y47G6A.26;puf-11;C15H11.13
21ur-2164	1.47049	4.68437	0.000765386	0.0903073	2.75310780656461 ± 0.103528338474925	IV	15294153	15294173	+	21ur-2164	aat-1;clh-5;col-53;col-91;col-121;col-148;col-158;col-173;daf-10;dhs-29;dim-1;dpy-6;dpy-7;dyf-6;egl-45;eor-1;fox-1;gcy-22;gly-2;gpb-2;gst-33;haf-3;him-1;isw-1;itr-1;lbp-3;let-23;lmn-1;lars-2;ccar-1;mig-23;mrp-7;mut-7;mut-14;nhr-68;npp-3;nsf-1;plc-3;parg-1;pmp-4;rad-50;rpn-5;sas-4;sel-5;sex-1;spg-7;srd-40;tor-2;twk-5;wrk-1;wrt-7;zen-4;asfl-1;folt-1;ugt-17;C08E8.5;C09F9.2;C09G1.2;pptr-2;C14A6.5;C25…
21ur-8403	1.32752	6.16732	0.000767715	0.0903073	2.40624050379682 ± 0.309426792329497	IV	14991255	14991275	+	21ur-8403	nhr-12;F25D7.5;T01D3.6;Y39B6A.36;cbn-1
21ur-7174	1.09493	12.4815	0.000768071	0.0903073	2.1350993202111 ± 0.46996387687941	IV	15603855	15603875	+	21ur-7174	acr-5;unc-22;mig-32;isy-1;H05L14.1;mrpl-16;Y57G11C.43;irld-58;sdz-36;C14C6.6;F56E10.1;copa-1
21ur-326	1.32752	6.16732	0.000768161	0.0903073	2.40624050379682 ± 0.309426792329497	IV	14991258	14991278	+	21ur-326	srw-68;D1086.3;T01D3.6;T02E1.2;ZK1225.4;clec-205
21ur-13299	2.354	3.75541	0.000777634	0.0903073	4.945392673845 ± 0.879968250619441	IV	15829494	15829514	-	21ur-13299	egl-45;klp-20;lpd-3;stn-1;arrd-3;dhc-3;F01D4.5;nphp-4;Y116A8C.11;nhr-229;ZK637.4;B0524.6;exoc-7;M04F3.4;copb-1;nol-6;F31E3.12
21ur-4229	1.89977	4.18864	0.000799003	0.0903073	3.40646081486791 ± 0.255254335928373	IV	15946629	15946649	-	21ur-4229	asm-1;bbs-2;ceh-32;cyb-3;dys-1;lin-45;ncx-3;pen-2;skr-19;srd-55;srh-89;srv-24;pptr-2;C25F9.5;C35C5.8;C47E8.4;C49C3.9;F22B5.6;F47B10.8;M04C3.2;lgc-16;T08G11.3;T14G10.5;inpp-1;T28B8.3;nduf-7;nhr-234;Y43F8A.5;Y43F8B.11;tbc-20;tag-349;srbc-43;srbc-44;bath-24;B0416.2;C09F5.1;fbxc-53;cutl-28;bath-2;myo-5;atg-2;T04C4.1;T05H4.7;T14B4.8;tat-4;gpa-18;W05G11.4;srsx-6;Y60A3A.24;pals-15;irld-51;R04A9.9
21ur-8605	1.89975	4.18864	0.000799518	0.0903073	3.40646081486791 ± 0.255254335928373	IV	15946626	15946646	-	21ur-8605	cyp-29A4;C04A11.1;best-14;F54C8.7;F58D2.2;arrd-17;T15D6.8;C18C4.7;C33F10.8;C46A5.4;uri-1;F52G3.4;F54E7.6;K07E3.4;T10H10.2;aly-3;cyb-3;cyn-12;dys-1;frm-5.1;gap-2;gst-6;laf-1;lrp-2;prx-3;rpl-33;snf-6;srh-89;sym-4;dmd-6;B0019.2;usp-50;E03H4.3;F01G10.10;F49B2.6;F56H6.1;T13F3.4;agxt-1;inpp-1;W02B12.4;Y11D7A.7;Y60A3A.16;tag-349;C05D9.7;F09E10.7;T04C4.1;bcas-2;tat-4;Y37B11A.2;fbxa-25;T09E11.12;C13C4.8;F…
21ur-2618	2.05878	3.67667	0.00080648	0.0903073	5.09555295435058 ± 1.27507815279327	IV	16701952	16701972	+	21ur-2618	ace-3;hsp-90;rig-4;srh-125;srw-77;srx-14;C18B12.6;idhb-1;abts-2;F54B11.8;F59B2.9;agl-1;T08A11.1;Y51H4A.1;Y54E5A.2;sinh-1;lmp-2;dop-4;F21C10.11;irld-13;srbc-59;mel-46;Y39H10A.1;lgc-33;him-19;madf-9
21ur-8082	1.0404	8.61681	0.000817327	0.0903073	2.07204108220339 ± 0.232265533190382	IV	16870040	16870060	-	21ur-8082	wee-1.3;F49B2.6;nphp-4;pde-1;scav-2;ZK856.5;sec-10;F18A1.1;hda-6;F47E1.1;F17C8.9
21ur-2217	-1.16968	7.78762	0.000818377	0.0903073	0.447697944594311 ± 0.0642938523697281	IV	15408789	15408809	-	21ur-2217	psd-1;cyp-43A1;F52H2.7;cav-1;dhc-1;gei-13;nid-1;sri-9;ulp-5;F32B6.10;F41E7.1;lam-2;F35H10.10;F42A6.1;npp-21;T05C3.2;Y55H10A.2;F17C8.9
21ur-2473	1.0404	8.61681	0.000818561	0.0903073	2.07204108220339 ± 0.232265533190382	IV	16870043	16870063	-	21ur-2473	ggr-1;gst-5;lrp-1;nas-32;qui-1;vit-6;wee-1.3;eif-2Bdelta;M05B5.4;rev-1;ubr-4;T23E7.2;Y39F10B.1	rev-1
21ur-11405	1.0404	8.61681	0.000818618	0.0903073	2.07204108220339 ± 0.232265533190382	IV	16870044	16870064	-	21ur-11405	ggr-1;lrp-1;mrp-7;qui-1;srr-2;set-6;eif-2Bdelta;M05B5.4;ain-1;ubr-4;R05G6.10;btb-12
21ur-1077	1.09793	6.55304	0.000833438	0.0910409	2.15020530339659 ± 0.26614661875971	IV	14437639	14437659	-	21ur-1077	hoe-1;pqn-41;cpna-5;F07C6.4;F10D11.2;F59A2.2;C27A12.6;nrd-1;F32B5.6;ttr-20;mig-39;T21D12.12;Y9C9A.8
21ur-3882	-1.40132	5.1943	0.000858453	0.0923644	0.391260047036482 ± 0.0174824528282	IV	4961787	4961807	-	21ur-3882	sre-1
21ur-10503	2.35822	3.33345	0.000868895	0.0923644	6.16835008447225 ± 0.822598187812617	IV	14122847	14122867	-	21ur-10503	ace-3;alh-1;atf-6;crh-1;dgk-1;lem-2;lin-45;mec-9;mix-1;pes-9;pqn-89;swsn-1;ref-2;srw-9;wwp-1;C17D12.7;F53F8.5;F53H2.3;M04B2.2;T24B8.7;T28F4.5;pamn-1;trpl-2;cdap-2;Y51H7C.5;Y54G2A.11
21ur-7175	2.35823	3.33345	0.000870424	0.0923644	6.16835008447225 ± 0.822598187812617	IV	14122846	14122866	-	21ur-7175	ace-3;aha-1;alh-1;atf-6;ced-1;dgk-1;ham-1;lin-45;mix-1;mpz-1;pes-9;swsn-1;ser-1;srw-9;unc-62;wwp-1;lcmt-1;clec-230;F53F8.5;F53H2.3;egas-3;Y73F8A.5;F19C7.8;F31A3.3;prp-17;plpp-1.1;F54G2.1;T03G6.3;T04A6.1;T28F2.2;Y51H7C.5;ZC196.4
21ur-12908	1.35597	6.99315	0.000953349	0.0987136	2.49345812348073 ± 0.417035026308476	IV	16358558	16358578	+	21ur-12908	cdh-9;cuc-1;dhc-1;egl-9;gcy-22;gei-8;gei-13;goa-1;gst-42;lpr-1;lov-1;odr-1;pmp-4;szy-20;abu-13;pqn-85;ptr-13;sru-7;srx-131;sys-1;vps-34;chd-7;C03E10.3;chil-6;hgap-2;F19H8.2;F20G2.5;bed-3;F28H7.8;hpo-31;K03H1.5;K04G11.3;K04H4.2;R03C1.1;mask-1;mrpl-50;T23B5.3;W03C9.1;Y56A3A.2;Y75B8A.8;chil-9;C12D12.1;syx-6;acdh-2;C45E1.4;C46H11.10;clec-141;farl-11;F22E5.2;cla-1;comt-1;F56A4.4;H43E16.1;pqn-52;npp-21…
21ur-668	1.35596	6.99315	0.000954013	0.0987136	2.49345812348073 ± 0.417035026308476	IV	16358559	16358579	+	21ur-668	dhc-1;ego-2;goa-1;lpr-1;lov-1;odr-1;pmp-4;sru-7;hgap-2;F19H8.2;F20G2.5;F28H7.8;glo-3;irld-39;K04G11.3;R10D12.8;T20F10.5;mrpl-50;Y46G5A.29;sta-1;syx-6;C36E6.2;C45E1.4;bcl-11;F19C7.2;cla-1;H43E16.1;K02F6.3;R05D3.2;T19D12.1;set-30;C18D11.7;C53D6.11;M03A1.8	dhc-1
21ur-5312	1.26689	6.12533	0.000964474	0.0987136	2.39461809466879 ± 0.570255766393627	IV	14261634	14261654	-	21ur-5312	lrp-1;npp-10;pcp-2;sel-5;srd-15;str-64;str-208;str-255;tag-68;tsp-6;vbh-1;C10C5.7;C14C10.5;C34C12.2;F31D4.2;F53C11.5;F54D5.12;F57F5.1;T28A8.3;mecr-1;Y7A9A.1;efa-6;ZK795.2;ZK1098.3;ugt-7;prmt-4;C30E1.8;C34D10.1;F10G7.10;F20D6.11;F21A9.2;F40E3.6;F48E3.4;F54D10.4;teg-4;K08D9.2;R151.8;spat-3;tftc-1;gbb-1;F43D2.6;T28A8.8	ZK795.2
21ur-628	1.0896	9.57346	0.000985426	0.0987136	2.12625957508314 ± 0.498305775660457	IV	14690413	14690433	-	21ur-628	nrf-6;tag-153;unc-49;chil-27;cpsf-3;W08F4.7;Y47G6A.5;otub-2;Y82E9BR.3;cul-6;lad-2;mua-3;unc-52;C45B11.2;F01D5.6;R08A2.2;hrde-2;rga-1;tat-1;abhd-3.1;cyp-31A5;gdh-1;hpo-28;F47E1.4;egas-4;glf-1;R08C7.8;ZK686.2;Y60A3A.25;F26G1.9	gdh-1
21ur-2259	2.2729	3.91194	0.000989006	0.0987136	4.54463313007026 ± 0.970994927287632	IV	15834575	15834595	+	21ur-2259	aex-1;fsn-1;grp-1;mel-11;mix-1;mtm-6;nas-5;nhr-14;psr-1;rrf-2;sox-3;sri-4;abcx-1;tsp-11;unc-78;wht-2;C14C10.5;C40H1.8;mam-2;F16B12.5;ent-6;F57G12.1;cyp-13A8;T28B8.3;srt-11;Y18D10A.11;Y70G10A.2;C10A4.7;fln-2;acer-1;E04F6.10;F08F8.6;sorf-2;F59B1.10;K09F6.9;T13C5.7;W03F11.4;Y32H12A.8;Y48G1C.5;Y52E8A.3;trpp-10;Y73B6BL.22;W04G5.16;F52D2.12
21ur-4108	1.63778	3.92883	0.000992218	0.0987136	3.81120393371714 ± 0.522043193090737	IV	14179283	14179303	+	21ur-4108	srab-10;nhr-142;teg-4
21ur-2689	1.63778	3.92883	0.000992275	0.0987136	3.81120393371714 ± 0.522043193090737	IV	14179282	14179302	+	21ur-2689	ced-1;egl-43;snpc-4;grl-19;ifc-1;ifc-2;kin-21;tank-1;prx-2;scp-1;spp-13;C38C6.3;F58H1.6;K09E4.3;R10E4.3;mask-1;nphp-4;Y49A3A.3;nyn-2;ipmk-1;rpb-2;sdha-2;C39D10.8;F09C12.8;osg-1;W04C9.6;dhs-28;nhr-78;srj-40;ufd-2;gnrr-2;F58D2.2;T14G10.5;Y56A3A.16;npr-13;teg-4
21ur-6706	1.11434	10.3809	0.00104018	0.102393	2.16662133669855 ± 0.537416846342182	IV	16003334	16003354	+	21ur-6706	aqp-9;ndg-4;spk-1;sru-11;taf-1;uba-2;unc-22;fbxa-167;Y39B6A.30;Y64G10A.7;cla-1;slc-25A18.2;lect-2;K05F6.10;erfa-1
21ur-3978	1.42887	4.45171	0.00105399	0.102393	2.84638705543551 ± 0.326230999746484	IV	4897357	4897377	-	21ur-3978	col-78;col-151;glr-3;srd-10;srg-46;srw-98;srw-112;dsb-1;F25B3.4;trhr-1;F45C12.9;egas-4;T20H9.6
21ur-10939	1.42888	4.45171	0.00105683	0.102393	2.84638705543551 ± 0.326230999746484	IV	4897358	4897378	-	21ur-10939	elt-6;unc-80;mboa-4;fbxb-102;K01G12.3;clec-58;trhr-1;C45H4.13;nlp-62;F46F11.7;egas-4;K11G9.5;bet-1;fbn-1;pdp-1;C45H4.21
21ur-5997	-1.11131	8.43785	0.00112691	0.108241	0.464788598715277 ± 0.0323593044152503	IV	6114548	6114568	+	21ur-5997	srw-103;T27E4.1
21ur-9049	-2.12071	2.76832	0.0011511	0.108554	0.180784575232094 ± 0.0832048451614056	IV	14192970	14192990	+	21ur-9049	ced-5;chp-1;col-63;col-79;col-99;ctn-1;dys-1;egl-8;ego-2;F35A5.8;fli-1;fars-3;glr-1;him-1;hum-4;hum-7;isw-1;kin-18;lrk-1;nmy-2;nud-1;pms-2;ptr-23;rfc-1;rig-1;spc-1;srw-87;srx-36;srx-92;taf-3;ttn-1;mrck-1;unc-22;unc-41;B0001.2;sucl-1;C06C3.7;C14B1.2;C28D4.4;C28D4.5;F02C12.1;eif-2Bdelta;lex-1;mig-32;F22B5.10;F25H5.2;F46C5.10;F53C11.4;F54B3.1;F54D1.6;png-1;chd-1;H12D21.10;K01D12.10;mam-3;K11B4.1;R03…
21ur-11507	-1.15735	7.99105	0.00115832	0.108554	0.44977308677011 ± 0.0401414391055427	IV	5497735	5497755	+	21ur-11507	gon-2;hil-1;srh-27;unc-5;F36H2.3;R10E12.2;B0524.2;C46H11.7;phat-1;flcn-1;F46F5.13;T22F7.3;Y47G6A.19
21ur-5402	-1.15735	7.99105	0.00115939	0.108554	0.44977308677011 ± 0.0401414391055427	IV	5497739	5497759	+	21ur-5402	plx-1;unc-5;glb-8;T28B8.4;C09E7.4
21ur-5720	1.41224	4.69478	0.0012086	0.11072	2.66017756577375 ± 0.100033773750575	IV	15294145	15294165	-	21ur-5720	oac-4
21ur-5265	1.27349	5.48031	0.00121188	0.11072	2.33513625859534 ± 0.178187020152398	IV	15603278	15603298	+	21ur-5265	ced-8;nuo-1;C56A3.6;F33H1.4;T24D5.3;T28C6.7;Y57G11C.23;ZK1010.5;ddi-1;C49H3.6;ipla-4;F09F7.5;F52E1.5
21ur-1514	1.27348	5.48031	0.00121234	0.11072	2.33513625859534 ± 0.178187020152398	IV	15603279	15603299	+	21ur-1514	usp-5
21ur-8268	2.26982	3.87721	0.00124858	0.112619	4.80440165487894 ± 1.45885698253777	IV	14353167	14353187	-	21ur-8268	dnj-13;dpy-22;lpd-6;lys-3;nas-15;pis-1;pqn-21;rgs-1;rrf-1;srh-38;str-243;sym-4;arrd-3;twk-14;twk-31;igdb-2;C33B4.4;C53A5.11;F02C12.1;mlt-9;phf-31;wht-5;F34D10.6;fbxa-181;F47G9.4;F54F12.1;golg-4;fozi-1;ptp-4;pelo-1;ztf-17;oac-46;T24B8.3;T27D12.1;Y6E2A.5;slc-25A46;Y51A2D.13;Y105C5A.1;C05C8.8;hex-2;math-14;math-7;C17G10.1;anat-1;E01A2.1;ddx-23;skpo-3;rpb-4;F53B1.2;F56D2.3;H34I24.1;M57.1;T05H4.10;mat…
21ur-14253	-1.38936	4.08887	0.00126869	0.112619	0.348988442588209 ± 0.083673210787345	IV	6834353	6834373	+	21ur-14253	aat-7;air-1;chs-2;clh-2;dao-5;glh-1;glt-5;gly-6;gon-2;mab-10;nas-4;pod-2;rpt-3;srd-42;srh-272;srr-1;srw-79;srw-143;nck-1;unc-78;BE10.4;C34E11.2;F13H10.3;tbcd-1;uggt-2;F34H10.3;F53F4.4;amph-1;ctf-18;nduo-4;T05C12.4;ostb-1;cyp-13A2;rsa-2;Y116A8C.9;C03G6.17;C04C3.6;inst-1;C12D12.1;srb-15;let-611;C55C3.1;F10D2.10;ilys-5;vpr-1;mks-1;Y37E11B.2;rep-1;Y69A2AR.31;C49G7.12;F19G12.9;C02H6.3;F11G11.15
21ur-11110	-1.3894	4.08887	0.00127112	0.112619	0.348988442588209 ± 0.083673210787345	IV	6834354	6834374	+	21ur-11110	ccr-4;crh-1;npp-19;nrf-6;rpt-3;rsp-5;srd-42;C11H1.7;C25F9.9;oac-8;F13H10.3;uggt-2;ctf-18;irld-47;oac-42;tat-3;srz-85;inst-1;C28H8.3;C55C3.1;D1007.8;F10D2.10;ncbp-1;mks-1;ckr-1;srt-62;rep-1;C49G7.12
21ur-8175	-1.38944	4.08887	0.00127355	0.112619	0.348988442588209 ± 0.083673210787345	IV	6834357	6834377	+	21ur-8175	ham-1;srd-2;sup-10;sre-38;cyp-37B1;T14G8.3;nrps-1;mtq-2;F21C10.9;hrg-1;Y27F2A.11;dpf-3;far-5;gei-1;grl-21;hsp-25;mab-3;pqn-41;rps-5;srx-10;sym-4;wee-1.1;crm-1;B0457.6;C15C6.1;C34F6.10;F13H10.5;F33H2.2;F36A2.3;F46B6.2;F55G11.10;amph-1;ctf-18;T05F1.11;csnk-1;vps-33.1;cdc-26;srt-1;toe-2;F08F8.7;F44A2.5;K02E10.7;frpr-14;T22D1.5;srt-2;ZC449.5;R144.12;W09G12.10;C45B11.6;D2089.8
21ur-12941	2.41214	3.07482	0.00128714	0.112923	6.40282487821879 ± 0.963253464544806	IV	14734089	14734109	+	21ur-12941	srj-44
21ur-11401	-1.06045	7.72465	0.00130623	0.113096	0.485042490050673 ± 0.0500167510633974	IV	5529098	5529118	-	21ur-11401	lin-7;mec-10;romo-1;exos-1
21ur-6652	-1.06044	7.72465	0.0013094	0.113096	0.485042490050673 ± 0.0500167510633974	IV	5529097	5529117	-	21ur-6652	lin-7;exos-1;T10E10.3
21ur-14614	1.02175	11.6293	0.00140006	0.118439	2.02856279041302 ± 0.416513008909371	IV	15694954	15694974	-	21ur-14614	alg-1;bli-3;col-61;cul-5;dhs-29;eor-1;gpa-13;lin-53;ncx-2;rap-1;spt-5;unc-22;unc-83;C03H12.1;C28D4.7;fbxa-167;C54G4.2;E02H4.5;best-12;F15G9.2;F22D6.15;F26E4.5;F28H6.4;bath-45;F59F5.7;mrpl-10;K08F4.3;M02G9.1;nth-1;T11B7.1;T15D6.11;T21B10.3;Y45F10B.8;Y45F10B.9;pyk-2;ZK1086.3;C02D5.2;C03B1.7;C04E6.5;madf-11;C24A3.2;C30G12.3;C31H1.1;osr-1;C49A9.3;C50F2.1;D2096.12;F13H8.1;F39H12.1;fbxc-39;mrpl-14;gakh…
21ur-378	1.02175	11.6293	0.00140316	0.118439	2.02856279041302 ± 0.416513008909371	IV	15694953	15694973	-	21ur-378	alg-1;col-61;daf-1;dhs-29;dnj-11;egl-4;evl-14;gcy-35;nhr-12;nhr-115;npp-15;rpt-1;srd-42;srp-6;tag-96;tra-2;unc-31;unc-76;unc-80;unc-83;ver-4;xtr-1;C03H12.1;pals-8;C27B7.6;C27B7.7;C28D4.7;fbxa-167;skih-2;best-12;F15G9.2;F22D6.15;bath-45;F44E5.4;F44E5.5;F47B8.10;F56D5.5;F56D5.9;oac-36;F57B1.1;H38K22.4;cisd-3.1;T08G11.1;T11B7.1;T12G3.6;ttr-54;Y40H7A.10;efhd-1;set-26;Y57A10A.7;ZK1086.3;C03B1.7;aexr-2…	bath-45
21ur-1508	-1.27145	5.21385	0.00144018	0.119097	0.420545921898235 ± 0.0714922699608847	IV	15535733	15535753	+	21ur-1508	lin-18;srv-28;str-18;str-144;D2030.11;mpst-3;lyst-1;sdz-30;lgc-55;mtq-2;clec-78;F59G1.4;M03F8.3;R09A1.3;jmjc-1;rde-10
21ur-2498	1.18399	5.22036	0.00145405	0.119097	2.29168589856909 ± 0.115883380596638	IV	14504072	14504092	-	21ur-2498	fkh-3;fkh-4;sru-31;syx-2;unc-6;ptp-4;K09A11.1;sorb-1;nhr-258;mbl-1;polq-1;fln-1;F08B4.8;ZK105.14
21ur-7599	1.18399	5.22036	0.00145635	0.119097	2.29168589856909 ± 0.115883380596638	IV	14504071	14504091	-	21ur-7599	adr-1;sru-31;vit-1;K09A11.1;sorb-1;T05H4.7;gadr-5
21ur-6364	1.18399	5.22036	0.0014568	0.119097	2.29168589856909 ± 0.115883380596638	IV	14504067	14504087	-	21ur-6364	dnj-10;nlp-6;rbr-2;rars-1;rsp-6;sru-31;C15F1.8;F37A4.4;fbxb-20
21ur-4375	1.25799	12.1476	0.00146439	0.119097	2.39019125817521 ± 0.393495124301163	IV	14126024	14126044	-	21ur-4375	bre-1;cep-1;ears-1;haf-4;lig-1;mec-12;nhr-102;tank-1;ric-3;rme-8;sax-2;srw-36;unc-82;ver-4;glp-4;C33G3.4;ztf-2;F15B9.6;F29G6.1;F38A1.8;cal-7;magu-4;cbd-1;chd-1;dod-17;T06E4.5;pash-1;W04A8.6;Y44A6D.2;eif-2Bbeta;asna-1;dbt-1;arrd-4;npr-19;math-8;C45G9.10;C50C3.2;F01F1.3;F37A4.4;nhr-142;nep-16;F56F4.3;K09H11.4;R05F9.11;R05G9R.1;erfa-1;fbxa-60;T21D12.7;nhr-226;sknr-1;Y32H12A.7;mbtr-1;cdh-12;prp-31;F4…
21ur-1216	1.67678	4.46668	0.00148465	0.119869	3.30408748320712 ± 0.792763628038937	IV	16901600	16901620	+	21ur-1216	ceh-44;dys-1;gcy-9;kin-18;lin-46;sax-2;B0024.15;B0272.4;F14D7.6;gmps-1;nhr-37;lgc-50;Y65B4A.6;clp-6;dyf-2;gsy-1;nas-8;pqn-18;sel-11;srh-227;srh-228;srh-283;srh-284;srx-58;ttn-1;unc-73;vars-1;lgc-20;C15C8.6;C27B7.7;C33D9.6;smcl-1;fbxa-189;F54E12.2;srxa-2;prp-3;rbm-28;npax-3;hrde-2;irld-56;Y43D4A.5;tdpt-1;fbxa-126;Y73F8A.14;C26E6.12;C35D10.7;F53A10.2;H14N18.4;nstp-7;K09E3.6;igdb-3;T23B3.6;mgl-3;Y46…
21ur-15217	1.03478	7.1182	0.00156788	0.120534	2.01626799433621 ± 0.245579462538173	IV	15237919	15237939	+	21ur-15217	dic-1;pgp-3;pgp-4;tbb-2;H09F14.1;ddb-1;Y14H12B.2;ipla-6;ZK105.1
21ur-4691	-1.41483	5.02615	0.00156818	0.120534	0.373887601424326 ± 0.0882936187483726	IV	16674948	16674968	+	21ur-4691	srx-33;F13E9.11;mus-101
21ur-5653	1.03478	7.1182	0.00156861	0.120534	2.01626799433621 ± 0.245579462538173	IV	15237922	15237942	+	21ur-5653	dhs-5;spp-11;srb-2;srx-28;fbxa-98;C49A1.10;srbc-50;T10G3.4;alg-5;mrpl-32;F49E10.4;taco-1;Y38H6A.5
21ur-4408	1.20392	5.88836	0.00159592	0.121793	2.22081057664831 ± 0.272008428940738	IV	14161007	14161027	-	21ur-4408	abt-2;bra-1;cpb-2;mom-5;nas-31;puf-8;trp-1;rbpl-1;R09A8.1;fcd-2;sta-1;ZK1307.4;pitr-3;C16C8.11;atg-16.1;Y18H1A.1;wdr-4;uvs-1;T06F4.3	sta-1
21ur-2935	1.62956	4.56948	0.00161194	0.122178	3.20633707767456 ± 0.980532394431757	IV	5974848	5974868	-	21ur-2935	nex-1;snt-3;srg-30;asd-2;F36D3.5;mask-1;T16G12.1;chil-25;Y43F8B.2;Y43F8B.13;mrpl-9;F41G3.6;irld-8;T10E10.3;shl-1;T03F6.7;Y55F3C.9
21ur-1656	1.39926	7.74887	0.00168206	0.126245	2.61447122310044 ± 0.743380145832537	IV	14097572	14097592	-	21ur-1656	cyn-6;dnj-16;dpf-4;nhr-1;pqn-10;glb-8;W02D9.4;F13H8.8;T25F10.3;W08F4.10
21ur-5101	1.0551	8.03151	0.00169781	0.126245	2.09788058640566 ± 0.35792822310221	IV	14298018	14298038	-	21ur-5101	arrd-28;Y102A11A.3
21ur-15453	1.05511	8.03151	0.00169958	0.126245	2.09788058640566 ± 0.35792822310221	IV	14298021	14298041	-	21ur-15453	rgs-5;try-4;T11A5.6
21ur-164	-1.18007	5.24663	0.00175794	0.129715	0.439265173434724 ± 0.0644784175183198	IV	13623659	13623679	+	21ur-164	col-113;mex-1;mgl-1;nhx-9;str-19;C11E4.6;C25F9.5;hda-11;C46C2.5;F11F1.1;clec-161;JC8.7;R08B4.3;T28F3.5;W02A2.8;Y69H2.10;Y79H2A.3;ZK856.11;ain-1;C30F12.2;poml-2;pole-2;set-9;let-355;Y40C7B.3;Y73B6BL.14;arid-1;F33H1.4
21ur-8437	2.06427	3.12153	0.0017932	0.13052	5.56584931154124 ± 0.363803462441882	IV	15786674	15786694	+	21ur-8437	glr-4;lin-45;nhr-23;rsa-1;set-8;nhr-232;sre-41;ZK994.1
21ur-3384	-1.01644	9.04033	0.00180777	0.13052	0.495464246081667 ± 0.0751907289500917	IV	16587756	16587776	-	21ur-3384	pqn-32;math-13
21ur-15357	-1.01644	9.04033	0.00181061	0.13052	0.495464246081667 ± 0.0751907289500917	IV	16587759	16587779	-	21ur-15357	din-1
21ur-3031	1.16579	5.16365	0.00182734	0.13052	2.3834662535892 ± 0.285926099767352	IV	16341738	16341758	+	21ur-3031	C25A11.1;C46H11.10;F29B9.1;Y4C6B.3
21ur-9250	1.16579	5.16365	0.00182742	0.13052	2.3834662535892 ± 0.285926099767352	IV	16341737	16341757	+	21ur-9250	C54C6.5;F36G9.7;M01B2.10;chin-1;C25A11.1;F29B9.1;Y4C6B.3
21ur-2480	-2.24586	2.49742	0.00185434	0.130766	0.148261440295992 ± 0.068041943202536	IV	6048289	6048309	-	21ur-2480	aqp-10;erd-2;gcn-2;oac-29;hyl-2;mup-4;nhr-86;str-199;str-200;vha-6;C17G1.5;lgc-43;lips-10;hpo-34;ippk-1;ubr-1;T19D7.6
21ur-12881	-2.24586	2.49742	0.00185434	0.130766	0.148261440295992 ± 0.068041943202536	IV	6048290	6048310	-	21ur-12881	npp-12;lgc-43;mop-25.2;F55D1.1;T19D7.6
21ur-7231	1.18564	6.00984	0.00187649	0.13078	2.24388393240292 ± 0.268704593642811	IV	14280821	14280841	+	21ur-7231	abt-2;cle-1;eat-3;elt-6;lfe-2;mlk-1;pms-2;pph-4.1;pqn-67;unc-68;vit-1;B0457.4;C17D12.3;C34E11.2;F14B6.4;myrf-2;mdt-28;F55A11.1;mrpl-49;acl-7;Y47H9A.1;rpoa-1;B0303.7;C18H2.1;fhod-1;mboa-3;cgt-2;F32E10.5;F52G3.1;F55A12.6;esyt-2;mbtr-1;Y50D7A.8;Y47D3B.12;C17E4.20;cyb-2.2;eef-1A.2;srd-26;srg-66;srg-68;unc-82;ugt-2;daf-36;F38E11.6;M01G12.14;R03G8.4;glb-21;sipa-1;B0546.3;C13A10.1;F07F6.1;F40G9.14;srt-3…
21ur-2496	1.18564	6.00984	0.00187801	0.13078	2.24388393240292 ± 0.268704593642811	IV	14280818	14280838	+	21ur-2496	aex-6;ceh-21;hbl-1;nas-23;B0035.15;lex-1;oac-20;F52D10.2;F54C9.11;ztf-26;M176.4;set-16;cutl-15;Y56A3A.16;fan-1;C27D6.1;C46G7.1;nmur-3;F13B9.1;K07D4.6;sago-1;met-2;pcaf-1;Y54F10BM.9;Y77E11A.7;irld-64;F56F4.8;R04A9.9;cic-1;plc-2;srg-66;srg-68;srv-32;unc-73;xbp-1;C08F8.3;C32H11.9;dod-21;F07C6.4;F32G8.2;F43D2.3;R09E10.1;Y105E8A.21;C17G10.3;clec-6;lst-6;F39F10.4;F48G7.13;acc-3;K10G6.4;spat-3;best-17;Z…
21ur-8608	1.86266	3.59567	0.00193186	0.131559	3.65762485709865 ± 0.178380621599181	IV	14540414	14540434	-	21ur-8608	atgp-2;csq-1;gcy-25;glp-1;gly-6;snf-7;soc-1;sra-25;ttn-1;twk-17;ser-5;F22B3.8;fbxa-181;pdcd-2;T13H5.1;Y16B4A.2;Y73F8A.24;bath-24;pac-1;C06E4.1;C35B1.5;aexr-3;F13H6.3;bgnt-1.2;abts-3;R02E12.4;cct-7;T15B12.2;ccep-290;atln-1;tag-244;ZC13.10
21ur-5208	1.09643	6.49308	0.00193425	0.131559	2.06515827233664 ± 0.0554585690277482	IV	14751836	14751856	+	21ur-5208	cpr-2;lpd-3;rbr-2;unc-97;sre-51;M01G5.1;ZK742.3
21ur-7224	-1.3081	5.94257	0.00193461	0.131559	0.40998939555732 ± 0.0861817318478783	IV	17129980	17130000	-	21ur-7224	bre-4;dsc-1;duo-3;egl-45;ifb-1;nhl-2;nmy-2;syd-2;unc-95;fubl-1;C31G12.4;F28C1.3;trpl-2;ZK154.6;pdp-1;mrps-30
21ur-2923	1.09641	6.49308	0.00193642	0.131559	2.06515827233664 ± 0.0554585690277482	IV	14751839	14751859	+	21ur-2923	lin-35;ptr-22;F30F8.1;fbxa-126;CC8.2;ast-1;ZK177.1;mel-28;B0464.9;K04G2.9;ZC116.3;C05B5.16
21ur-1668	2.02845	3.30588	0.00200643	0.135012	5.07675878242152 ± 0.844044826283588	IV	14499254	14499274	+	21ur-1668	csp-2;mel-32;C41G7.6;T16H12.4;snrp-200;E03H12.5;T23B3.5;ift-139;aps-2;nas-32;str-208;K07C5.9;K08F9.4;chhy-1;cutl-4;B0244.4;F09G2.1;F22E5.11
21ur-2500	-2.82606	2.47972	0.00201497	0.135012	0.0925674687807966 ± 0.0477369843825273	IV	13681647	13681667	+	21ur-2500	cdk-4;pqn-67;rpt-3;taf-11.3;C29F7.3;fshr-1;F11C1.5;F21G4.1;Y75B8A.24;rbm-26;C03G6.5;C05D11.8;bath-15;C36C5.4;epg-5;C56G2.4;fbxb-71;F46H5.2;pfkb-1.2;fbxb-32;Y71H2AM.13;B0462.5;T22A3.12;let-711;clec-229;Y116A8C.10;ubr-1;ugt-32
21ur-10239	1.39823	5.25207	0.00206548	0.135012	2.4774690870217 ± 0.351701131135886	IV	15926267	15926287	-	21ur-10239	col-113;daf-8;dpf-4;elt-1;glt-6;hum-1;ifg-1;lin-11;ltd-1;mat-2;mec-14;mars-1;rae-1;pld-1;pqn-87;ric-8;spe-12;srj-29;srw-101;str-188;tag-53;tcl-2;spon-1;xol-1;scpl-1;fubl-1;spe-44;wdfy-3;vps-50;F11F1.5;srz-16;F20C5.6;mig-38;F49E2.2;K01G5.10;K11D2.4;T24C2.3;catp-6;Y39A1A.16;snrp-200;spv-1;ZK829.9;gad-3;C02B10.6;C04E7.4;C10G8.2;C17H12.4;ubr-4;hosl-1;atg-16.1;F12D9.2;vps-41;F36H12.10;sumv-2;athp-2;T2…	xol-1
21ur-4863	1.39822	5.25207	0.00206615	0.135012	2.4774690870217 ± 0.351701131135886	IV	15926268	15926288	-	21ur-4863	col-113;cyd-1;ifg-1;klp-15;lin-11;lin-49;mec-14;pgp-10;pld-1;parp-1;pqn-87;rop-1;spp-15;srw-101;str-60;str-188;taf-1;tcl-2;unc-89;spon-1;xol-1;tufm-2;wdfy-3;vps-50;F11F1.1;F11F1.5;F20C5.6;F49E2.2;K11D2.4;T24C2.3;Y43F8B.14;lact-9;Y55D9A.2;spv-1;ZK829.9;gad-3;ugt-26;C26B9.1;ubr-4;hosl-1;acs-17;F12D9.2;F22E5.17;smk-1;sumv-2;F54G2.2;exc-6;kcc-3;R02D3.7;pygl-1;ztf-18;T25G12.2;jhdm-1;W01B11.6;Y4C6B.1;Y…	klp-15;xol-1;K11D2.4;msrp-2
21ur-12337	-1.03765	7.12136	0.0021089	0.135012	0.48793554923339 ± 0.0643998500045251	IV	7431568	7431588	+	21ur-12337	pgp-6;sto-2;T02G5.7;K10C2.14
21ur-7389	2.27502	3.49533	0.00211589	0.135012	4.71635941097134 ± 0.910244860017279	IV	16982478	16982498	-	21ur-7389	cnt-2;hch-1;pgp-2;unc-2;F11F1.4;F14B6.3;mam-3;ggtb-1;soap-1;fnta-1;cblc-1;ZK1290.7;T06D4.6
21ur-452	1.17813	5.08164	0.00211986	0.135012	2.42246773792068 ± 0.133146172282335	IV	15786745	15786765	+	21ur-452	arx-3;cdh-3;unc-68;fbxb-9;pch-2;ugt-30;B0207.5;ugt-28;ipla-4;F22E5.12;math-28;oac-22;rabs-5;fbxa-9;plst-1;rbr-2;sdf-9;B0334.3;Y70G10A.2;M03F8.5;T19D12.10
21ur-14947	-2.63203	2.68773	0.00215132	0.135012	0.128953408648331 ± 0.0987313624411701	IV	13897008	13897028	+	21ur-14947	NA	NA
21ur-618	1.51478	4.85721	0.002159	0.135012	2.87401389560267 ± 0.774928244461915	IV	5770665	5770685	+	21ur-618	cey-1;chk-2;dpy-6;ggr-1;ndx-6;num-1;srx-58;tba-2;unc-63;vav-1;npr-6;erv-46;M04C3.2;M106.2;nhr-206;lyst-1;T25G3.4;T28C6.7;W04G5.4;ash-2;fbxa-209;snx-14;Y67H2A.10;ZK1098.2;C03B1.6;C05D10.4;lam-2;F32A5.4;F48C1.3;H14N18.4;T02G5.3;W03D8.1;Y4C6B.5;Y17G9B.8;hpo-29;Y71H2AM.3;Y92H12BL.1;dmsr-9;gcy-33;mgl-1;nhr-109;pqn-96;rig-3;acs-19;C53A5.13;mlcd-1;F36A2.2;F53C11.1;F54B3.1;M18.6;T13F3.6;T28A8.6;best-22;m…
21ur-12265	1.51478	4.85721	0.00216227	0.135012	2.87401389560267 ± 0.774928244461915	IV	5770668	5770688	+	21ur-12265	fut-4;madd-3;zak-1;gale-1;F23D12.1;F36A2.2;F55H2.5;M02G9.1;nhr-145;Y48E1C.4;ZK596.2;pks-1;F16G10.11;F44E2.6;fbxa-183;F47B7.4;fbxb-17;memb-2;R04B3.3;Y55H10A.2;ZK180.3;ttr-42
21ur-6394	-1.11082	5.25224	0.00217545	0.135012	0.4589738646028 ± 0.0621190152277817	IV	6639355	6639375	-	21ur-6394	lin-12;mex-6;srh-218;skpo-1;W06D11.2;Y47H9C.1;B0207.1;tyr-1;T13F3.8
21ur-2648	1.03044	5.76706	0.00219006	0.135012	2.08712676722689 ± 0.148706485563945	IV	15749455	15749475	+	21ur-2648	dcp-66;fcho-1;R05G6.10;W02H5.2;anc-1;dgk-2;gad-1;hum-7;nmy-2;pmp-4;svh-1;T22C8.3;sorb-1;R11G1.6;T22B2.6;F18E3.12
21ur-2574	1.32548	5.08973	0.00223876	0.135012	2.43260300064919 ± 0.313536182408692	IV	16126948	16126968	+	21ur-2574	gbh-2;glb-18;R10H10.3;rev-1;faah-1;C30G12.3;npr-35;mth-1;H31G24.3;R11F4.3;T02B11.8
21ur-4931	1.44891	5.49945	0.0022446	0.135012	2.85491586522174 ± 0.896650595158856	IV	15821329	15821349	-	21ur-4931	ttx-1;C06E4.3;F26G1.1
21ur-11397	1.46418	5.71804	0.00225147	0.135012	2.62031532584953 ± 0.523495454193292	IV	13719914	13719934	-	21ur-11397	apd-3;bbs-2;ced-7;csq-1;dao-4;dis-3;dpf-3;ehn-3;fkh-5;kin-30;let-23;let-381;mig-15;mog-5;dcap-2;nhr-34;nhr-134;nhr-136;tank-1;ras-1;skr-20;spc-1;taf-1;tkr-3;ugt-1;B0001.2;C28A5.6;tbc-19;F07A5.2;F10G8.8;oac-15;F15D4.4;F23B2.10;glb-15;F52F12.9;F54B3.1;F54D1.1;xdh-1;F57G12.1;F59D12.3;K02C4.3;cbp-2;lgc-49;pitp-1;M7.7;dlc-2;R03G8.1;chil-19;chil-21;mask-1;eea-1;srab-17;rbm-22;T19B10.5;chil-26;mlt-11;tt…
21ur-3532	1.21131	5.65461	0.00225607	0.135012	2.31733033712993 ± 0.481678849228375	IV	15192977	15192997	-	21ur-3532	frm-2;gcy-1;gcy-2;lam-3;lgg-3;mec-6;mom-1;paf-1;pqn-80;ptr-3;rec-8;srh-133;srh-295;sri-42;srw-73;xnp-1;chil-2;chil-8;gadr-2;C35A5.8;din-1;rtcb-1;F46C5.6;F59F5.7;chil-13;chil-18;bgnt-1.7;T25B9.1;ZK669.3;C31H1.5;C32D5.7;pks-1;met-1;C48B6.3;cdh-8;F19C7.3;nep-15;irld-13;fbxc-33;T13G4.4;irld-1;T08G11.2;fkh-9;gcy-13;mlh-1;plx-1;rsd-6;srv-14;srx-1;srx-101;vha-3;tufm-1;C05C10.7;oac-5;D1046.2;F13B12.3;F19…	F52B5.3
21ur-9363	1.2113	5.65461	0.00225844	0.135012	2.31733033712993 ± 0.481678849228375	IV	15192976	15192996	-	21ur-9363	ced-10;gcy-13;haf-1;lin-49;plx-1;spe-15;D1046.2;ent-6;phlp-2;H40L08.1;T05C12.11;T06D8.2;W03C9.5;ash-2;Y26G10.1;pro-3;ttm-1;Y39E4B.6;clec-194;misc-1;C17F4.7;C54E4.4;tag-304;F54D12.7;F55G1.15;K09D9.9;R07E4.1;fbxb-82;Y55F3BR.6;hrpu-2;ZC449.4;F26F2.8;ZK813.6
21ur-7917	-1.05294	5.95133	0.00228089	0.135012	0.479799291591948 ± 0.0843848616919686	IV	5724227	5724247	+	21ur-7917	zyg-9;T15D6.8;T15D6.11;C18H7.1;rdl-1;lmd-4;lmd-5
21ur-12780	-1.4049	4.71595	0.00229033	0.135012	0.374247107909458 ± 0.0644477323772335	IV	5721863	5721883	+	21ur-12780	fkh-5;haf-9;ima-3;F07A11.4;T21C9.4;Y6B3B.4;Y6G8.2;gcn-2;ubr-1;F48E8.4;zip-4
21ur-6239	-1.4049	4.71595	0.00229043	0.135012	0.374247107909458 ± 0.0644477323772335	IV	5721868	5721888	+	21ur-6239	T24H10.5;mmcm-1;math-2;math-4;rig-6;F18E3.10;F47E1.4;sdz-23
21ur-6818	-1.0888	7.49828	0.00240587	0.140347	0.476614700461785 ± 0.0442453190325371	IV	13908129	13908149	+	21ur-6818	dhs-17;H24K24.2;T01H10.11;Y55F3AM.14	Y55F3AM.14
21ur-14239	1.15315	6.05862	0.00245032	0.140501	2.2171449411794 ± 0.468506985932991	IV	16556698	16556718	-	21ur-14239	daf-18;lrp-1;nhr-5;srh-89;srv-6;plrg-1;AC3.5;sart-3;C06A12.3;C27A7.1;pyp-1;F13G3.7;F49C12.12;fbxa-135;T28D6.5;Y41C4A.9;ZK666.8;C25E10.5;F56B3.9;sdz-23;T20D4.11;srz-97;clec-250;C25F9.11;F26G1.11;ZC513.14;C13C4.8
21ur-6031	1.15314	6.05862	0.00245464	0.140501	2.2171449411794 ± 0.468506985932991	IV	16556699	16556719	-	21ur-6031	add-2;col-177;lin-41;lrp-1;mua-3;rol-3;ser-2;sra-34;srb-3;srh-89;srw-51;srx-46;sdhb-1;plrg-1;sart-3;C05C10.2;srsx-37;srsx-36;T28D6.5;Y17G7B.19;Y37A1A.2;sdz-2;C25E10.5;F26A10.2;F29A7.6;sdz-23;T20D4.11;mis-12;gck-2;F26G1.11;ZC513.14;C13C4.8;Y69A2AR.46
21ur-7137	1.15314	6.05862	0.00245896	0.140501	2.2171449411794 ± 0.468506985932991	IV	16556700	16556720	-	21ur-7137	add-2;dnj-29;frh-1;glt-4;inx-7;mua-3;plk-2;parp-2;pmp-3;srh-89;sup-17;sdhb-1;sart-3;thn-1;thn-3;thn-2;F34H10.2;thn-4;F54B11.9;K02E11.6;fbxa-135;Y79H2A.3;F37A4.4;cyp-33C5;cyp-33C4;T07F12.2;T19A5.1;gck-2;pdp-1;F26G1.11;ZC513.14
21ur-6362	-1.28428	5.44118	0.00248568	0.141303	0.405897277165051 ± 0.155697316254974	IV	15956361	15956381	-	21ur-6362	let-765;srd-51;tag-77;C09H10.9;F19H8.2;srab-17;Y6D1A.1;attf-6;C04G6.6;C10G8.8;tag-294;T03D3.5;ZC196.4
21ur-5375	-1.26335	5.51786	0.00270832	0.152558	0.439271987225379 ± 0.104106056325366	IV	5343724	5343744	-	21ur-5375	sup-17;F10C2.5;R07A4.3
21ur-6979	-1.56083	3.88047	0.00274568	0.152558	0.339651778982803 ± 0.0725061839803011	IV	17160767	17160787	-	21ur-6979	dyc-1;ggr-3;osm-6;srw-69;acd-3;R08A2.5;fbxb-59;C50D2.9;maoc-1;frpr-6;mfsd-6;F07E5.5;otub-2;pde-6;ZK1055.2;F57C12.6
21ur-1837	1.05904	6.24977	0.00275213	0.152558	2.04552484206121 ± 0.221762547242996	IV	15986317	15986337	-	21ur-1837	cbp-1;hum-4;klp-17;rol-6;spe-42;ttr-23;Y17G7B.22;usp-3;F27D9.7;F43C11.1;K09C6.7;K09C6.8;Y67D8C.7;sorf-1
21ur-984	-1.6613	3.50883	0.00279722	0.152786	0.311768592720104 ± 0.111524234212981	IV	6490357	6490377	+	21ur-984	glr-7;str-135;AC3.5;F13G3.6;R07B7.10;efhc-1;nrps-1;B0511.11;C44B7.7;Y102A11A.3;Y49F6B.14;Y47G6A.32;gcy-8;gly-12;hmr-1;mgl-1;npp-14;odr-1;tbg-1;AC8.4;C35C5.10;F28G4.4;clec-161;allo-1;Y64G10A.7;gcn-2;ugt-18;pssy-1;AC7.3;C34B2.11;hpo-27;F18E9.7;R05D3.12;Y37F4.1;Y82E9BL.12;fbxa-61;AC8.11;C41G7.8
21ur-5596	1.7138	3.89845	0.00280676	0.152786	3.28594616742253 ± 0.505671115509548	IV	13806485	13806505	+	21ur-5596	fars-1;glr-3;ins-12;let-99;nhr-28;pab-2;ret-1;rig-3;trr-1;ugt-1;F40F9.10;F54B3.1;psf-1;arrd-17;Y38H8A.4;cccp-1;Y53F4B.21;lgc-34;VC5.2;W03F8.4;M01D1.12
21ur-3477	-1.29038	4.56272	0.00280757	0.152786	0.382232518982882 ± 0.162386457021751	IV	15265715	15265735	+	21ur-3477	cyn-13;gon-2;ifa-4;lec-3;sel-2;C09F9.2;npr-4;F28B4.3;T19E7.6
21ur-14020	-1.2904	4.56272	0.00281109	0.152786	0.382232518982882 ± 0.162386457021751	IV	15265720	15265740	+	21ur-14020	eat-3;let-363;nhr-107;srx-78;C29A12.6;cyp-37B1;T16A9.5;F15B10.3;F17A9.2;acds-10;Y18H1A.9;fipr-18;fipr-19;Y54G2A.76
21ur-9017	-1.12218	5.47109	0.00286908	0.1541	0.474423264652735 ± 0.0248558173689337	IV	6682632	6682652	-	21ur-9017	ckb-1;spr-1;srw-13;T17A3.12;fbxa-74
21ur-735	-1.18049	6.71787	0.00294181	0.1541	0.448989112397126 ± 0.0395647195895564	IV	5589636	5589656	-	21ur-735	dpy-2;htp-2;prx-11;tra-1;F21D5.3;ZK632.12;srz-102;C54F6.17;grl-3;xpo-2;cpna-1;unc-84;set-5;K10D6.4;slc-25A46;Y105E8A.3;B0511.11;F13B9.1;frl-1;srz-37
21ur-3242	1.66441	4.39674	0.00304116	0.157635	3.25176452230122 ± 1.13398081996122	IV	13727829	13727849	-	21ur-3242	cbp-1;ced-3;cit-1.2;col-19;cpb-1;cpr-6;dli-1;dnj-5;elo-1;emb-30;evl-14;frm-7;gcy-18;hid-1;hyl-1;mrp-1;nhr-6;smf-1;srb-8;sri-38;sru-16;sru-17;srw-17;tsr-1;uaf-1;C06A1.2;C14C10.2;C17D12.7;F10G8.2;F17C11.12;F35E12.2;fbxa-189;F54B11.8;smc-6;sre-31;atp-1;K10D11.3;nfya-1;T21B10.3;T25C12.3;mnr-1;ceh-100;Y43F8C.3;grsp-1;sam-10;Y53F4B.18;tag-349;lron-13;Y116A8C.9;shk-1;nhr-147;nhr-149;C27A12.9;C54E4.4;C55…
21ur-10431	1.66441	4.39674	0.00304178	0.157635	3.25176452230122 ± 1.13398081996122	IV	13727832	13727852	-	21ur-10431	cah-3;csp-1;gpa-4;mtm-3;nhr-100;blmp-1;wdr-5.1;unc-98;C17D12.3;C36B1.11;F21D9.4;irg-5;M04C3.2;vps-53;T13H5.4;W04G5.3;gpap-1;Y47H9A.1;ZK1053.3;shk-1;C03B1.2;nhr-156;F21C10.9;dct-6;F42G2.5;F42G9.1;cyp-35A3;R12C12.6;T07F8.1;polq-1;Y40B10A.5;nhr-238;Y50D4B.4;daf-41;C08D8.7
21ur-7072	1.12319	6.54523	0.00307599	0.15867	2.10742990095439 ± 0.34792337315427	IV	16026412	16026432	+	21ur-7072	coq-3;nhr-115;samp-1;Y17D7B.3;Y62E10A.3;C17F4.3;C18G1.6;C27A12.7;fahd-1
21ur-2636	1.07194	5.40061	0.00318776	0.161306	2.11922505092371 ± 0.165003856737375	IV	14967271	14967291	+	21ur-2636	sri-20;M04C3.2;C04E6.11;F09G2.2
21ur-5586	1.23645	4.90318	0.00322427	0.161306	2.27399895667362 ± 0.191971571044824	IV	15174208	15174228	-	21ur-5586	dic-1;rha-1;spp-16;srw-77;clec-109;emre-1;ekl-1;F53C11.4;spat-1;rga-5;K01D12.7;mrps-34;Y57G11C.6;tep-1;C01B7.7;C24D10.1;npr-35;F07B7.13;ugtp-1;Y49E10.29
21ur-12148	1.23644	4.90318	0.00322519	0.161306	2.27399895667362 ± 0.191971571044824	IV	15174209	15174229	-	21ur-12148	imb-1;mpz-1;rha-1;spp-16;srw-77;emre-1;F52G2.3;K01D12.7;lsd-1;ekl-6;T28F3.5;Y57G11C.6;Y105C5B.18;tep-1;C24D10.1;F18A1.1;F23C8.5;nstp-8;lgl-1;F53F10.8;Y49E10.29
21ur-11875	1.37623	4.42429	0.00323696	0.161306	2.7076742710959 ± 0.408559654194563	IV	14849090	14849110	+	21ur-11875	alh-4;haf-1;nhr-93;pmp-2;thk-1;unc-89;irld-21;fubl-1;F14H3.12;F35E2.2;hpo-35;H08M01.1;chil-12;ddx-52;R07E5.4;fcd-2;Y67H2A.7;C04E7.4;sams-4;C10A4.2;idhg-2;F22E5.1;F25E5.1;F55F10.1;T12E12.6;T20D4.3;Y37E11AL.6;Y92H12A.4;ZK816.4
21ur-7192	1.37623	4.42429	0.00323865	0.161306	2.7076742710959 ± 0.408559654194563	IV	14849087	14849107	+	21ur-7192	alh-4;cul-6;daf-10;dhc-1;div-1;dpy-26;gcy-25;gly-2;haf-1;nas-30;nhr-6;nhr-13;npp-15;oat-1;pmp-2;rab-8;rgr-1;rsr-1;str-176;itsn-1;unc-3;unc-89;prx-10;C05C9.3;C24H11.5;F22G12.5;drsh-1;ogr-2;F57G12.2;cox-11;K08H2.5;chil-12;srt-44;ddx-52;R08A2.5;cdt-2;ugt-56;ddx-19;T08G5.3;T11B7.1;Y17D7B.2;Y39B6A.37;Y51B9A.7;Y59A8B.8;Y75B8A.19;elpc-2;ZK1067.2;B0207.5;vps-33.1;C01F1.1;sco-1;ugt-7;C16C8.4;C30E1.2;C34B2…
21ur-4835	1.37623	4.42429	0.00324291	0.161306	2.7076742710959 ± 0.408559654194563	IV	14849084	14849104	+	21ur-4835	ced-5;srx-44;B0379.7;sdz-8;F25H8.1;F35E2.2;H12D21.11;trpa-2;C49C8.8;dcr-1;fer-1;gly-2;hars-1;itr-1;let-413;let-765;mog-4;nas-30;nhr-13;nhr-97;pcp-2;plx-2;pqn-18;ebax-1;rnf-1;sod-3;spp-11;spr-3;srh-46;sri-71;srx-96;sur-5;ttn-1;rhgf-2;twk-22;unc-8;unc-120;chd-7;C07B5.2;irld-24;C33A12.4;gadr-2;F13E9.4;F26D2.10;F28G4.2;uig-1;psa-3;F44D12.6;F44E5.3;F45D3.2;F53F1.3;F57G12.2;parn-1;kmo-2;R07B7.12;T08A11…
21ur-197	1.14524	6.61684	0.00335147	0.164515	2.12248700748199 ± 0.223281385575206	IV	17051044	17051064	-	21ur-197	ctn-1;tag-89;C08A9.3;dnc-4;mrps-18C;Y41D4A.1;pas-4;cyp-13A11;C04G6.2;C49C8.1;W06G6.17	pas-4
21ur-5954	1.52398	3.6174	0.00335472	0.164515	3.61068868596048 ± 0.456841932200629	IV	16116490	16116510	-	21ur-5954	aat-4;acr-9;eps-8;fem-2;nhr-128;nhr-137;pkc-3;skr-8;srg-16;tsp-11;ulp-5;unc-36;tiar-3;C14A4.6;C33B4.5;C33D3.3;rtfo-1;K12G11.6;T13H10.2;W09D10.4;Y37H2A.1;Y43F4B.7;Y48C3A.18;parn-2;yars-1;ZK1067.4;B0546.4;C16C8.13;tbc-16;F54A3.5;R06B10.7;smcr-8;trpl-2;Y5H2B.1;nsy-4;Y39G10AL.1;Y67D2.7;Y92H12A.5;plst-1;ZK185.1;M02E1.3;srsx-15;tag-266
21ur-12175	1.52404	3.6174	0.00336017	0.164515	3.61068868596048 ± 0.456841932200629	IV	16116493	16116513	-	21ur-12175	cng-3;col-19;col-132;hsp-90;dcr-1;let-49;let-607;lin-29;ngp-1;pmr-1;pars-2;rab-8;srj-53;try-6;wnk-1;degt-1;F35C11.4;F42G4.2;F49E12.12;M04C3.2;T02C1.2;T25C12.3;W09D10.4;irld-56;Y43F8B.1;nova-1;Y105C5B.1;Y105C5B.8;Y111B2A.12;srt-12;EEED8.2;lmd-4;F10D7.5;nop-1;math-27;F53F10.2;F59A7.2;gnrr-5;H34C03.2;smcr-8;T07E3.4;T26A8.1;helq-1;mrpl-45;F20D6.12;Y48A5A.3;C46C11.4;ZK105.11
21ur-13912	1.52411	3.6174	0.00336648	0.164515	3.61068868596048 ± 0.456841932200629	IV	16116495	16116515	-	21ur-13912	col-87;coq-8;dpf-7;dsl-5;gst-33;hmr-1;let-607;let-756;nfm-1;pgp-14;phf-5;pmr-1;rpl-11.1;sma-3;tba-1;try-6;unc-11;C32C4.1;C32C4.3;C44B9.3;timm-23;degt-1;nurf-1;F35C11.4;acbp-3;png-1;M03C11.6;M153.3;T22C1.5;cutl-4;pptr-1;nhr-230;Y43F8B.1;spe-38;eyg-1;Y102A5C.2;Y105C5B.1;B0432.7;nhr-152;sre-11;srbc-9;C18F10.9;C33E10.6;rpap-3;F37A4.1;M70.5;R09B5.11;smcr-8;T20B6.2;T26A8.1;W02D7.4;Y49F6C.2;Y54F10AM.8;Y…
21ur-1490	1.01315	8.49235	0.00341287	0.166053	2.01229847811258 ± 0.491420164607342	IV	15373192	15373212	+	21ur-1490	ech-5;emb-4;let-2;ndc-80;nos-3;spe-9;spr-4;sri-47;sri-48;kcc-1;trp-1;twk-2;twk-24;unc-89;F02H6.7;oac-17;F32D8.12;ubr-5;hrg-4;wdr-5.2;T24B8.7;T25C12.3;ZC116.3;rev-1;erp-44.2;C08G9.2;C16C8.16;vps-45;C52E2.4;tofu-6;F07G11.3;F22E5.6;nono-1;F26F12.3;F37A4.4;F55C12.4;ucr-1;K04C2.5;K11G9.2;acs-15;srab-16;T20F5.6;vps-18;clec-70;Y71G12B.5;ipla-6;F47D2.11;bpl-1;gei-13;let-767;pph-1;pqn-15;sea-2;srg-50;srg-…	ggtb-1;symk-1
21ur-11311	-2.25875	2.48187	0.0034348	0.166117	0.150718572285659 ± 0.0956573732925394	IV	5824750	5824770	+	21ur-11311	F32B6.10;mxt-1;mrpl-38;Y71G12B.31
21ur-7835	-1.34139	4.735	0.003444	0.166117	0.417874715883742 ± 0.0712640690879766	IV	16772095	16772115	-	21ur-7835	col-7;col-62;T09B9.5;T27A8.5;C38C3.3;cnep-1;C30G7.3
21ur-5094	-1.30844	5.55556	0.00351191	0.168663	0.419367641673847 ± 0.0734260052463378	IV	5735630	5735650	-	21ur-5094	srh-211;srj-50;spon-1;C37E2.2;dma-1;C02B8.3
21ur-8109	1.15442	6.43219	0.00354427	0.169486	2.18850847490789 ± 0.561571362305244	IV	14730520	14730540	+	21ur-8109	brp-1;cbp-1;cft-1;dnj-23;grk-2;pha-2;sqv-6;unc-89;zen-4;fbxa-98;C11H1.2;lron-1;F54B11.5;srab-18;T15H9.5;Y39B6A.42;Y79H2A.3;rpom-1;dod-20;wht-1;C16H3.3;C24H12.4;vps-22;C33E10.5;F16B4.5;F35C8.5;F56B3.2;K07B1.7;let-355;Y41D4A.3;Y50D4B.7;Y50D7A.3	grk-2
21ur-9392	1.58295	4.11977	0.00360395	0.170343	2.9822265889126 ± 0.407423596290673	IV	16579856	16579876	-	21ur-9392	aex-5;bro-1;col-150;dnj-11;hmg-3;lrp-1;nhr-65;nhr-115;pad-1;prx-5;smp-1;srj-42;ivns-1;twk-34;unc-2;cpna-5;cyp-29A4;dph-1;mrps-31;spin-3;F15B9.6;F43D9.1;slc-25A42;bath-38;T03F7.6;oac-56;ZK1128.7;shk-1;ddn-1;C12D12.1;klf-1;cpt-4;ger-1;nhr-225;W06A11.4;Y25C1A.8;Y77E11A.2;tag-241;C07A9.13
21ur-6277	1.58295	4.11977	0.003606	0.170343	2.9822265889126 ± 0.407423596290673	IV	16579855	16579875	-	21ur-6277	aex-5;bro-1;dnj-11;him-10;srj-42;twk-34;unc-2;wdfy-3;F43D9.1;slc-25A42;bath-38;T03F7.6;T05A1.5;ddn-1;srbc-6;klf-1;cpt-4;ger-1;Y25C1A.8
21ur-13415	1.58296	4.11977	0.00360806	0.170343	2.9822265889126 ± 0.407423596290673	IV	16579854	16579874	-	21ur-13415	srj-42;wdfy-3;C35C5.8;F43D9.1;srbc-6
21ur-5395	1.59376	4.81364	0.00362825	0.170574	2.76465450011774 ± 0.581126700907922	IV	16607787	16607807	-	21ur-5395	col-180;dhs-24;dpf-7;gta-1;ida-1;ima-1;nhl-1;nhr-40;nhr-60;npr-1;pcp-4;srw-59;str-61;str-156;zhit-3;abcf-1;twk-9;ubc-1;dph-2;C27D8.4;C28A5.1;C28A5.2;efsc-1;snrp-40.1;F09A5.2;scav-4;sdz-13;F21G4.6;F23B12.4;F26A3.1;F40G12.11;F53C11.5;swan-1;F54F12.1;tsfm-1;lact-3;sec-31;T08G11.1;srsx-19;T24H10.4;Y20C6A.1;Y50E8A.6;cpsf-3;lonp-2;ZK512.2;cyp-34A5;cyp-34A9;gmeb-1;C04E7.3;attf-4;C18G1.7;lonp-1;noah-1;hp…
21ur-12605	1.78754	3.67019	0.00374018	0.173638	3.52175258809907 ± 0.317547858797095	IV	5019469	5019489	+	21ur-12605	dcp-66;srw-115;srw-124;tps-2;unc-68;D1081.7;gpdh-1;pot-2;nduo-3;sulp-7;Y53H1C.3;Y54E5A.7;nrps-1;Y87G2A.16;soap-1;ddr-1;vha-16;F07E5.8;F13C5.2;cee-1;F28A10.5;K09E2.1;clec-175;W03F9.9;clec-123;ttc-37;Y54E10A.11;npr-5;ZK381.8;R05C11.4
21ur-5865	-1.44631	4.70771	0.00378524	0.174742	0.37742568370725 ± 0.113968860789929	IV	13629936	13629956	-	21ur-5865	bli-2;chs-2;col-40;col-68;col-85;col-174;col-181;daf-5;grl-23;grl-25;vab-10;lpr-2;oac-53;tag-293;AH9.6
21ur-1852	-1.11949	4.79349	0.00379533	0.174742	0.467343582975293 ± 0.0116095127223399	IV	13899309	13899329	+	21ur-1852	gln-1;srh-37;chhy-1;C44B7.5;T24H7.2
21ur-1358	-1.4638	4.29889	0.00390959	0.176615	0.358042367326118 ± 0.017345333874707	IV	14261550	14261570	-	21ur-1358	mig-15;vps-26;pptr-2;F13B12.2;Y45F10C.1;ZK1128.1;C15H9.4;F08D12.4;tbc-16;T14E8.4;grl-10;nhr-97;scd-2;sma-1;F54D1.6;rle-1;rmd-1;C31B8.9;F35B3.7;F53H1.4
21ur-2733	1.02171	7.76357	0.00391156	0.176615	2.0020385231957 ± 0.387025059652478	IV	15700969	15700989	+	21ur-2733	air-2;cyn-4;nas-37;ugt-17;C34E7.4;ugt-15;F21H7.2;usp-33;nrde-2;cccp-1;ZC116.3;denn-4;ugt-8;kcc-3;T08B1.4;mgl-3;Y92H12BR.7
21ur-10968	-1.4638	4.29889	0.00391605	0.176615	0.358042367326118 ± 0.017345333874707	IV	14261547	14261567	-	21ur-10968	nhr-97;epac-1;jmjd-1.1;twk-4;T01D3.6;ZK643.6;npr-19;C15B12.4;clec-3;T10E9.2
21ur-1362	-1.10175	7.59756	0.00393113	0.176615	0.471363828375258 ± 0.0746899352778514	IV	14183831	14183851	+	21ur-1362	ceh-20;ptc-3;src-1;unc-89;wdfy-3;ipla-2;bath-4;mfsd-6;nhr-222;Y39A3CL.7
21ur-14135	-1.08798	7.15653	0.00410379	0.178799	0.473858303518254 ± 0.0160545230792189	IV	6209976	6209996	-	21ur-14135	abt-2;cdh-4;cnt-1;nos-1;ebax-1;scp-1;srr-4;unc-73;unc-75;F49C12.5;saeg-1;F55F3.4;R107.2;trx-3;T19D12.4;Y41D4B.17;T01G1.4
21ur-14672	-1.08797	7.15653	0.00410597	0.178799	0.473858303518254 ± 0.0160545230792189	IV	6209975	6209995	-	21ur-14672	cdh-4;cnt-1;dpy-1;ebax-1;scp-1;str-4;unc-73;B0035.15;jmjd-3.2;copb-2;F46B3.14;F49C12.5;R10E8.8;Y71A12B.12;ZC116.1;C04E7.3;hda-6;fbxc-22;fbxc-21;H03E18.1;trx-3;egg-2;R08E3.1;T22B2.5;W02H5.8;Y45G5AM.7
21ur-7554	-1.08797	7.15653	0.00410816	0.178799	0.473858303518254 ± 0.0160545230792189	IV	6209972	6209992	-	21ur-7554	apt-9;bag-1;coh-3;cars-1;rom-4;sel-2;vbh-1;mus-101;K07F5.14;W09C5.7;chdp-1;C25E10.8;F56C9.8;T20F5.6;Y54G2A.50
21ur-11888	-1.36725	3.87846	0.00413966	0.178799	0.381397757030063 ± 0.0185690095832649	IV	15880635	15880655	+	21ur-11888	fmo-2;lbp-3;unc-16;cec-3;enol-1;W09D6.1;tbc-11;K08A2.4;nprt-1;F21C10.17
21ur-11839	-1.36725	3.87846	0.00414039	0.178799	0.381397757030063 ± 0.0185690095832649	IV	15880634	15880654	+	21ur-11839	dnj-16;lbp-3;lrp-1;W09D6.1;npr-13;ZK673.11;B0205.1;F25E5.5;K08A2.4;ZC155.2
21ur-5162	-1.59081	3.64048	0.00414394	0.178799	0.356453151190146 ± 0.10223114088866	IV	4846518	4846538	-	21ur-5162	srx-102
21ur-10569	-1.5908	3.64048	0.00414441	0.178799	0.356453151190146 ± 0.10223114088866	IV	4846519	4846539	-	21ur-10569	srw-145;spe-46;Y38H8A.2;snrp-200;Y48C3A.14;rga-3;T09B4.6
21ur-2638	1.17615	4.77032	0.00415023	0.178799	2.26735174634485 ± 0.166038702793929	IV	13956565	13956585	-	21ur-2638	lgx-1;mig-2;mtm-5;nhr-19;nhr-21;sri-29;ten-1;unc-34;spin-2;clec-227;pfas-1;aman-2;H01G02.1;R107.5;Y44A6C.2;F08F8.10;cpsf-2;clec-1;F26G1.1;F36H9.5;F56F4.4;ctsa-1;T03D3.5;lgc-54;T22F7.3;W06E11.1;W08F4.12;Y54G2A.12	aman-2;Y54G2A.12
21ur-8920	1.75371	3.79741	0.00415667	0.178799	3.33246686747062 ± 0.57523442412198	IV	5200349	5200369	+	21ur-8920	che-3;clh-5;dig-1;dpy-10;hst-2;lars-1;nhx-4;pars-2;sel-5;acl-3;ubr-5;copb-2;F54C8.1;H05L14.2;wdr-5.2;K09E4.1;R10E8.2;T13H5.6;Y45F10D.7;Y111B2A.27;C33C12.10;oac-21;fbxa-182;F52D1.2;met-2;dnc-6
21ur-10960	3.06361	2.54574	0.00416442	0.178799	13.7691635157304 ± 1.89063644088645	IV	16081727	16081747	+	21ur-10960	nhr-14;pgp-4;tufm-2;hmit-1.3;fbxa-135;irld-29
21ur-4258	1.54821	6.39776	0.0041723	0.178799	2.95722187569543 ± 1.56902272195752	IV	15268657	15268677	+	21ur-4258	cic-1;dyc-1;fmi-1;hot-1;hum-6;let-418;mlc-3;nhr-94;pqn-31;spo-11;srw-101;syd-2;unc-83;C06C3.8;fubl-1;C50B6.7;fbxb-102;F22E12.3;F26F2.1;K10D3.6;nduo-2;T27E7.3;Y57G11C.7;Y106G6G.2;ZK896.1;B0286.1;C27A2.5;C37A2.6;srbc-41;F52E1.9;F53H1.1;F59A7.5;Y39H10A.6;Y65B4A.8;fbxa-79;C39B5.14
21ur-1221	-2.50206	3.66365	0.00436229	0.185651	0.177050102351907 ± 0.0787218542418155	IV	5951929	5951949	-	21ur-1221	nhr-117;dgat-2;clpf-1;K08C9.2;Y57A10C.8;Y75B8A.32;gcn-2;ZK550.4;ZK1321.4;C18A3.10;F39C12.1;F53H8.3;oac-41;pqbp-1.1;F58G6.9;T24C4.8;mpz-1;nhr-116;rig-4;spe-39;srw-26;unc-10;zyg-9;acs-20;F49D11.3;H11E01.3;Y50D4C.5;Y73B6BL.31
21ur-3143	1.74772	3.84006	0.00436551	0.185651	3.10066624055506 ± 0.196334721186769	IV	17015779	17015799	-	21ur-3143	dnj-15;egl-36;isp-1;rnp-3;srh-48;wht-5;F58D5.5;nduo-6;R07E5.17;tag-273;C38C3.6;F54D12.7;K10B3.5;algn-14;Y71F9AL.11;ntl-4;srw-61;let-391;ubc-1;R10E8.1;sre-40	ubc-1
21ur-6408	2.53877	3.48066	0.00440288	0.185822	5.26672915757475 ± 1.57016257227863	IV	15005059	15005079	+	21ur-6408	apc-2;dhs-20;egl-5;frm-3;nhr-11;twk-34;unc-6;tag-196;cyp-35C1;C50F4.10;F13D12.6;F44E5.3;F59F5.7;K02D3.2;frpr-15;T05F1.2;smg-9;B0238.1;C15H9.2;C50C3.2;pink-1;fbxb-26;cct-7;nhr-275;T08G5.15
21ur-3462	-1.31776	4.56803	0.00445433	0.187283	0.410622135717395 ± 0.033827948701335	IV	16804366	16804386	-	21ur-3462	anc-1;dnj-20;fat-6;klp-4;mua-3;nhr-80;ppw-2;srw-76;srw-119;unc-76;unc-104;C28D4.7;C31H5.6;C34F6.10;C38C6.3;F11A5.13;spe-45;hda-5;mtcu-2;atad-3;K01A6.6;K03B8.4;lron-14;cox-4;fbxa-126;ZK1053.2;viro-2;C06E4.1;dpyd-1;F22D3.4;F22E5.20;panl-2;F46G11.1;F55F10.1;ipla-5;R09A1.2;epg-7;T19D12.1;T22B2.1;T25B2.2;Y27F2A.8;F41G3.19;C42D4.18;F43G6.17;che-6;coh-1;srh-193;srh-194;ubc-6;acs-20;fbxb-3;F22F7.2;prp-19
21ur-5030	1.26253	4.8748	0.00456274	0.191121	2.29984742109945 ± 0.316802466052383	IV	15228810	15228830	-	21ur-5030	dpy-11;frm-9;plc-3;ptr-23;rpl-24.2;madd-3;F54E4.2;chil-18;mrpl-16;T28A8.5;set-25;ZK1098.1;C33C12.10;C46A5.6;D1007.8;pccb-1;F53E10.6;Y24D9A.6;Y48A5A.1;icd-2;ZK652.8;nep-25;F32H2.11
21ur-3187	-1.19308	4.99298	0.00460286	0.191362	0.458432835385518 ± 0.0469109108303423	IV	5607749	5607769	-	21ur-3187	sumv-2;Y71H2AM.11
21ur-5396	1.91262	4.21094	0.00462217	0.191362	3.43592377758433 ± 0.888713376962791	IV	16148140	16148160	-	21ur-5396	rpm-1;srh-140;unc-36;vha-7;tag-189;E03H4.2;F10A3.12;iglr-1;F58H1.5;uda-1;nduo-4;R05D11.5;lyst-1;sre-28;Y116F11A.6;srz-4;C13E3.1;pks-1;F07B7.12;F46F11.1;F55C12.4;T25D10.4;Y22D7AL.9;szy-2
21ur-2567	1.33167	4.40198	0.00468369	0.191362	2.51054992189473 ± 0.348587093370786	IV	6031396	6031416	-	21ur-2567	amt-3;npp-12;xpf-1;ubr-5;F54D5.9;Y87G2A.1;clec-27;spv-1;tiar-1;hda-6;kcc-3;ani-2;C13C4.8
21ur-12268	1.33167	4.40198	0.00468442	0.191362	2.51054992189473 ± 0.348587093370786	IV	6031393	6031413	-	21ur-12268	grl-13;pmp-5;srg-11;srw-61;str-60;clec-227;F59B10.2;kmo-2;set-17;ugt-25;met-2;T22B2.2;rabs-5;toe-1;CD4.11
21ur-2849	1.79365	3.3388	0.00470801	0.191362	4.36586922491273 ± 0.67792391342607	IV	14164864	14164884	+	21ur-2849	cnt-1;fmo-1;pef-1;pmp-4;ran-5;tbx-37;C18B12.6;F11A5.4;F32B4.2;K04C1.2;ugt-62;M176.4;Y41E3.8;obr-1;Y53F4B.7;Y53F4B.26;ugt-26;F44E2.7;F59H6.5;H28G03.1;K09C6.7;R04E5.9;T21E3.2;T28C12.2;nol-58;Y16E11A.2;Y54G2A.13;ZK250.9;F55B11.7;cyk-1;dhc-1;ran-3;C06B8.7;F47H4.2;lpr-4;scrm-2;nhr-139;nhr-163;hrpl-1;symk-1;cus-2
21ur-8227	-2.14208	2.97858	0.00471474	0.191362	0.246520979825036 ± 0.116049545822941	IV	7416453	7416473	-	21ur-8227	cap-1;daf-10;dpf-6;gon-4;his-35;kap-1;let-19;mup-4;ncx-6;pgp-3;rgr-1;ttn-1;set-5;clec-33;R09A8.1;T11G6.3;T16G1.7;Y53F4B.1;B0041.8;F02E8.4;sec-6;golg-2;acbp-4;cutl-22;Y34B4A.7;Y37E11AL.2;Y67D8B.5;T19C9.10;col-141;daf-8;haf-7;str-90;uso-1;elpc-2;C44C1.6
21ur-2221	-2.16546	2.98926	0.00475597	0.191362	0.220406237925756 ± 0.0794649227667058	IV	16177381	16177401	+	21ur-2221	daf-2;grl-2;him-10;knl-1;let-711;plx-2;ptr-10;sri-18;tag-4;C17G1.2;srt-32;acs-12;drd-1;nhr-197;K09E4.2;R07B7.9;ugt-3;cpna-2;pot-1;srz-79;tmem-131;apy-1;F31F7.2;F36F12.2;F41H10.3;nhr-210;ccep-290;wago-11;cyy-1;Y75B8A.39;ZC449.8;fbxa-107;ZK829.7;K08B5.2
21ur-15652	1.19364	4.6587	0.00476366	0.191362	2.28626452141449 ± 0.172543572286962	IV	5857993	5858013	+	21ur-15652	abt-5;ccr-4;mog-5;sms-2;lgc-23;T04F8.6;Y37A1A.3;Y49F6B.2;Y71G12B.25;H06H21.11;W04G3.13
21ur-4374	1.19364	4.6587	0.00476607	0.191362	2.28626452141449 ± 0.172543572286962	IV	5857990	5858010	+	21ur-4374	tag-51;ZK287.7;tiar-1
21ur-10861	1.08579	5.72463	0.00479932	0.191362	2.26502772065515 ± 0.383035488741114	IV	14270313	14270333	+	21ur-10861	let-413;nmy-2;rad-50;smp-2;srh-201;srh-203;ubc-9;C14A6.3;C14A6.6;set-6;nhr-167;D1086.3;fbxa-95;exo-1;T09F3.4;sql-1;B0507.7;B0524.4;eri-6;C50E3.12;E02C12.6;F18G5.6;F28E10.1;F40H3.3;F53A10.2;K09F6.3;T20D4.10;F17B5.6	C50E3.12
21ur-9490	1.03182	6.11468	0.00482732	0.191362	2.00905043188137 ± 0.331424608696052	IV	16227511	16227531	-	21ur-9490	eif-3.I;kpc-1;sdc-3;sel-2;srb-3;vab-8;C06C3.7;irld-6;gpcp-2;fbxa-216;ugt-3;snb-7;B0207.5;B0280.7;C32D5.10;lact-5;bicd-1;F29B9.1;F46F11.1;F59C6.16
21ur-8421	1.2858	4.68119	0.00488732	0.191362	2.48118821303555 ± 0.456297665588636	IV	5808147	5808167	-	21ur-8421	che-3;evl-14;hrp-2;lig-4;lim-6;mab-21;mec-14;rad-54;C28A5.2;F02D10.3;F09A5.3;F18C12.3;F36G3.1;fig-1;F54E4.4;F58H1.3;R03G8.3;T04F3.1;T24H10.5;Y41C4A.12;fbxa-106;fbxa-116;nit-1;cpna-2;algn-11;toe-2;hda-6;ugt-19;cyp-33C8;Y37E11AL.3;srz-83;poml-4;K08H10.10;poml-3
21ur-863	1.33785	4.99548	0.00494012	0.191362	2.48018376394241 ± 0.612610610381895	IV	14261653	14261673	+	21ur-863	kars-1;seb-3;Y37H2C.1;mrpl-37;C17G10.1;fbxb-111;mans-3;nol-6;Y53G8AM.4;ZK430.7;F20D6.12
21ur-670	1.47364	4.0501	0.00495342	0.191362	3.26181057975599 ± 0.867902445691131	IV	16024747	16024767	-	21ur-670	bli-4;F53A2.3;fbxb-117;ZC376.6;nep-26;bath-44;C48E7.6;dod-19;srz-67;Y73B6BL.44;ceh-17;parn-1;yars-1;lst-6
21ur-8652	1.47365	4.0501	0.00495675	0.191362	3.26181057975599 ± 0.867902445691131	IV	16024744	16024764	-	21ur-8652	F31D4.2
21ur-7080	-1.36666	4.73664	0.00499175	0.191362	0.395791467116249 ± 0.100232908810105	IV	16665003	16665023	+	21ur-7080	uaf-1;C25G6.3;trpl-3;trpl-4
21ur-14283	-1.05074	5.26114	0.00499726	0.191362	0.48553367102749 ± 0.0501976952844941	IV	14650591	14650611	-	21ur-14283	nas-31;ncx-9;nud-1;rom-5;srh-125;tyra-3;pbrm-1;C27D8.2;cids-2;F53F4.11;F58H1.6;fbxc-53;F59A3.10;ZK484.4;ZK470.14;C09B9.85;B0244.17
21ur-553	-1.05074	5.26114	0.00499787	0.191362	0.48553367102749 ± 0.0501976952844941	IV	14650590	14650610	-	21ur-553	hpk-1;mut-7;rab-11.2;oac-35;R10E9.3;T22C8.1;F49E8.6;ttc-37;cit-1.2;fox-1;nhr-49;scd-1;ubc-25;unc-11;pbrm-1;rilp-1;C48B4.11;git-1;cids-2;ztf-11;F53F4.11;F54C8.7;K02B12.2;K03A11.5;T02E1.2;T10B10.4;set-26;C06A5.3;srt-5;set-9;F59A3.10;Y45F10D.16
21ur-6015	-1.36885	5.04513	0.00504416	0.192299	0.40165793491792 ± 0.0283353420530878	IV	5705619	5705639	+	21ur-6015	daf-4;itx-1;smg-5;E04D5.5;Y59A8B.19;elpc-2;C16C8.4;H20J04.1;K07E3.4;pals-18;Y59A8B.26
21ur-5840	2.5849	3.23581	0.00508435	0.192299	4.81813760148496 ± 0.429037894620558	IV	15695453	15695473	-	21ur-5840	abt-2;asp-2;bre-3;cof-2;del-1;flr-4;lin-37;nhr-98;nhr-123;ora-1;str-28;str-84;tax-2;B0250.8;C05C12.1;stip-1;C08B6.10;mltn-12;H05L14.1;M05B5.4;ugt-55;sptl-3;rlbp-1;T24D5.2;T25B9.9;irld-56;Y37H9A.3;spat-2;acr-24;C08A9.6;C56G2.15;D2024.1;afmd-1;DC2.5;E04F6.15;F32A5.8;tbc-11;F42C5.3;K05F1.9;R05D3.12;T15B12.2;Y18H1A.1;fln-1;ZK402.1
21ur-587	1.11795	4.75518	0.00511187	0.19242	2.3575617130215 ± 0.139185469527196	IV	15248676	15248696	+	21ur-587	aat-7;che-3;mup-4;taf-1;trpp-9;kmo-1;ddl-2;C35E7.2;tmc-1;inx-15;F46A8.8;F59A2.2;Y59A8B.24;C56E6.4;F49F1.9;vpat-1;elpc-1;W02B12.13;F27E5.8
21ur-6532	1.01635	9.73276	0.00515298	0.193315	2.01445760279427 ± 0.398824252348538	IV	13799442	13799462	-	21ur-6532	nac-3;old-1;old-2;str-74;wdfy-2;acox-1.6;T05E11.2;ZC116.3;rod-1;K02E10.7;srz-5
21ur-5836	-1.04434	5.24891	0.00523102	0.195584	0.484281199811354 ± 0.0801848953998132	IV	6052507	6052527	-	21ur-5836	cdh-7;gcy-23;nas-37;srj-38;ttn-1;C05C9.3;C15C8.6;F57C7.4;R03G8.1;Y113G7B.15;W03F8.6;Y110A7A.9
21ur-14959	-1.2355	4.70752	0.00547614	0.202214	0.449984951757122 ± 0.111364136571697	IV	5822650	5822670	-	21ur-14959	hrde-4
21ur-987	-1.23547	4.70752	0.00548095	0.202214	0.449984951757122 ± 0.111364136571697	IV	5822655	5822675	-	21ur-987	gcy-27;gop-2;mec-1;mix-1;mog-4;syd-2;C08F11.3;C17E4.1;ugt-15;E04D5.2;cup-15;M199.7;R11D1.2;ssu-1;Y116A8C.9;nhr-141;F48E8.4;R01B10.6;W01A11.1;Y53G8B.2;madf-1;sdz-34;acl-9;fbxb-87
21ur-7783	-1.63757	3.50977	0.00552168	0.202691	0.335203598979059 ± 0.102727680717267	IV	5908493	5908513	+	21ur-7783	grl-1;pmp-5;sra-3;srd-64;srh-1;tbx-39;abts-2;cbd-1;oac-37;R10E8.6;T01D3.1;W01F3.2;Y40B1A.3;Y50E8A.6;Y53C10A.6;C02B8.3;F25G6.8;F41H10.12;Y53G8AR.9
21ur-14323	-1.63753	3.50977	0.00553026	0.202691	0.335203598979059 ± 0.102727680717267	IV	5908512	5908532	+	21ur-14323	klp-17;Y14H12B.2
21ur-9333	1.98981	3.54016	0.00578179	0.208923	3.58022307471154 ± 0.339577496144786	IV	15581447	15581467	+	21ur-9333	apn-1;apa-2;cars-1;dars-2;gcy-20;kat-1;lim-6;mab-5;nhr-120;nhx-1;nhx-9;str-74;tra-2;twk-24;ucp-4;dhc-3;thoc-7;C03E10.1;srz-15;F21D5.3;K05C4.9;anp-1;T09B9.5;T24D5.2;sdha-1;C09B8.5;C09E8.1;mrps-18C;C56E6.4;D1037.1;nol-10;set-11;F36F12.7;F45E1.1;H20J04.4;K06A5.1;attf-5;Y69A2AR.19;cpx-1;lipl-5;bus-8;smg-3;fshr-1;K09A11.1;ZK1307.1;B0545.4;C13E3.1;C14B9.8;C23H3.5;R04B3.1;CD4.11
21ur-6757	2.49974	2.75785	0.00578392	0.208923	7.70129222486935 ± 2.12160671935632	IV	13956726	13956746	-	21ur-6757	arx-5;hop-1;let-502;dcap-2;snf-12;sri-15;srx-88;str-229;nlg-1;oac-28;oac-25;skat-1;sprr-1;R03G8.1;Y51A2B.2;algn-7;ZK829.9;C14B9.3;ugt-24;srt-5;clec-67;nape-2
21ur-706	-1.12403	4.60976	0.00581335	0.208923	0.466909698653732 ± 0.0476712809000728	IV	16814716	16814736	-	21ur-706	abt-5;clh-2;col-132;daf-12;dic-1;dnj-9;gon-2;gst-33;haf-3;xpo-3;kvs-1;mig-22;pat-9;rbc-2;rpc-1;sdc-1;ser-7;set-2;srx-78;sup-37;twk-24;twk-26;C15A11.7;gbf-1;D1043.1;E04D5.4;F17B5.1;ekl-1;tag-353;F31C3.6;F32B4.4;cfp-1;mcrs-1;ymel-1;Y60A3A.8;Y116A8C.30;dos-1;C06A8.8;rha-2;C25F6.7;erp-44.1;nmur-3;toca-1;F29C4.4;sumv-2;ccpp-1;syp-4;M02D8.3;R05G6.4;R173.3;Y38F2AR.3;Y60C6A.1;icd-2;copa-1;W03G9.8;mtm-3;s…
21ur-1148	1.04449	7.15238	0.00590482	0.208923	2.03015380549804 ± 0.399474249156256	IV	13830206	13830226	-	21ur-1148	cul-3;eat-16;fmo-3;let-19;lst-2;mau-2;rab-8;ran-4;sec-24.2;srh-21;sri-18;ubl-5;vps-26;mdt-21;hinf-1;Y38F1A.8;ttr-26;parn-2;Y105C5A.15;glb-9;C48E7.1;pole-2;kvs-3;F54A3.2;cct-3;T10B5.10;dmsr-13;siah-1;Y41D4A.6;K04C2.7;srb-2;tmd-2;Y53F4B.10;mrps-9;skpo-3;timp-1
21ur-7789	1.04449	7.15238	0.00590746	0.208923	2.03015380549804 ± 0.399474249156256	IV	13830207	13830227	-	21ur-7789	srh-71;unc-22;C39E9.7;R08D7.5;Y53F4B.10;C23H3.9;mms-19;skpo-3;F42H10.2;timp-1;fbxb-83
21ur-3433	-1.03252	5.69041	0.00593224	0.208923	0.508098896911652 ± 0.0525235627167313	IV	5761176	5761196	-	21ur-3433	sur-5;ugt-62;rgs-5;bckd-1A
21ur-4952	2.39965	2.71214	0.00594382	0.208923	7.24436231283351 ± 1.12683673033107	IV	16246907	16246927	-	21ur-4952	cca-1;dsl-7;mml-1;ppk-3;pri-2;ptr-3;rbf-1;sdhb-1;F21D5.4;F35E2.8;oac-38;Y42A5A.1;K02D10.4;bris-1;ZK488.5;dim-1;eat-20;flp-18;gly-12;hsp-17;nas-15;spp-7;srx-56;srx-62;tag-96;C09G9.1;F17A2.13;T20D3.8;math-8;timm-17B.1;R02F11.3
21ur-80	2.39966	2.71214	0.00594545	0.208923	7.24436231283351 ± 1.12683673033107	IV	16246908	16246928	-	21ur-80	abu-1;akt-1;ama-1;arx-1;arx-3;asb-2;btf-1;ccr-4;cel-1;cfz-2;ckb-1;cog-1;col-158;cua-1;cyn-2;cyn-8;daf-16;dhs-30;eat-6;emb-8;ent-1;evl-14;fat-3;fbp-1;fkh-7;gad-1;grp-1;gst-11;hlh-17;hlh-27;hmr-1;hsp-60;ifa-3;ify-1;ins-28;lec-3;lin-8;lrp-1;ccar-1;mat-3;mcm-2;cogc-1;dapk-1;ncl-1;ncx-1;ndx-6;nlp-9;ntl-4;nuc-1;par-6;pes-4;pfn-3;pph-4.1;epac-1;ran-3;rap-2;rig-3;rpl-20;sax-3;sdf-9;snt-2;srb-1;srd-40;srh…
21ur-2974	1.02265	5.64372	0.00596008	0.208923	1.9762090046895 ± 0.223638832204916	IV	14144752	14144772	-	21ur-2974	cpb-1;dgk-2;elo-8;gcy-14;lam-1;plx-2;ptr-13;sru-30;tbp-1;twk-7;ubc-24;ufd-2;ulp-5;unc-15;unc-115;C32C4.3;gska-3;F16B12.1;cids-2;F53B7.7;fbxa-96;T14B1.1;bgal-1;sulp-7;Y39A1A.18;Y111B2A.3;ZC247.1;C02B10.4;mvb-12;clec-124;C18A3.3;tiar-1;F25B4.7;F32D1.5;tbc-16;nmtn-1;K11H12.3;T09B4.2;ser-6;Y67D2.2;Y104H12D.4;F33G12.7;C06H5.8;K12C11.7;aat-4;eff-1;ppw-1;ptr-9;H21P03.2;Y106G6D.3;F08C6.5;C26D10.7
21ur-10057	1.02264	5.64372	0.00596279	0.208923	1.9762090046895 ± 0.223638832204916	IV	14144751	14144771	-	21ur-10057	eff-1;glt-6;ppw-1;eif-2Balpha;F08C6.5;F41H10.3;catp-7;C26D10.7
21ur-5440	1.10691	4.74786	0.00602543	0.209438	2.34068502658572 ± 0.130074840822817	IV	15248660	15248680	-	21ur-5440	sig-7;fkh-5;grk-1;srh-120;B0272.4;C50F4.1;F44A6.5;cgt-1;clpp-1;clec-74;hpo-20
21ur-14962	1.08117	7.99037	0.00606684	0.209438	2.092953714991 ± 0.473973504425397	IV	14382931	14382951	-	21ur-14962	alg-2;daf-18;dys-1;gpa-6;sel-7;syx-4;unc-24;unc-80;hgap-2;vps-36;F20C5.6;F32A11.1;pnn-1;ppat-1;T16G1.6;Y75B8A.16;rpom-1;ZC116.3;clec-117;C23H3.2;C35E7.10;C55C3.4;cla-1;F56F10.2;ephx-1;ergo-1
21ur-3454	1.08116	7.99037	0.00606916	0.209438	2.092953714991 ± 0.473973504425397	IV	14382935	14382955	-	21ur-3454	apc-2;hum-5;srh-142;B0513.5;C47E12.11;C53B4.2;pde-2;anp-1;W08G11.3;Y37A1B.5;Y57A10A.1;ZK1053.4;C28G1.6;ubr-1;irld-8;F53F10.2;bath-9;set-28;lfi-1;F56H9.6;C54C8.12	apc-2
21ur-10045	1.08116	7.99037	0.00607148	0.209438	2.092953714991 ± 0.473973504425397	IV	14382936	14382956	-	21ur-10045	bre-5;daf-12;inx-20;srw-31;srx-26;C50F4.10;C53B4.2;D2045.7;JC8.2;K04C1.5;R09A8.2;T10H4.4;T25B9.4;Y50E8A.6;dus-2;fbxa-53;T05C3.2;jhdm-1;sedl-1;bath-9;sar-1;upp-1;F11E6.11;F56H9.6;R02F11.9
21ur-9760	-2.75121	2.77016	0.0062611	0.212822	0.126794109546475 ± 0.0581898947086557	IV	6428743	6428763	+	21ur-9760	gdh-1;H11E01.3
21ur-13852	-2.75119	2.77016	0.00626441	0.212822	0.126794109546475 ± 0.0581898947086557	IV	6428742	6428762	+	21ur-13852	vps-54;oac-6;F49B2.6;gdh-1;hex-2;oatr-1;C25F6.1;F55F10.1;K11H12.4
21ur-7340	-1.24971	5.09838	0.00632671	0.212822	0.440229032125633 ± 0.0228612048811938	IV	14962289	14962309	+	21ur-7340	grl-14;F41H10.4
21ur-861	-1.0314	5.99422	0.00634771	0.212822	0.493072856300674 ± 0.0743174253362468	IV	15236517	15236537	-	21ur-861	ced-1;csp-2;hum-4;ifp-1;lbp-8;lpd-3;npp-10;oxi-1;pqn-41;rpl-11.1;snt-2;sqv-6;srh-7;srh-8;tap-1;tars-1;twk-20;pnk-4;gspd-1;leo-1;ccm-3;nrx-1;C56A3.6;cut-4;F08G12.5;uggt-2;F44E5.3;F46F2.5;F57G12.2;glo-3;K08F4.12;cpt-2;T05F1.7;T11G6.5;nra-1;Y39B6A.3;mrps-28;Y45F10D.6;sta-1;Y57G11A.2;Y57G11C.6;rpom-1;ZK507.1;ZK507.3;sor-3;spdl-1;C13A2.7;C17B7.12;D1014.2;F07G11.1;tag-340;srsx-9;F33D11.10;F35F10.5;F42C…
21ur-6698	-1.0314	5.99422	0.00635151	0.212822	0.493072856300674 ± 0.0743174253362468	IV	15236520	15236540	-	21ur-6698	asm-1;cul-5;dgk-3;kin-1;nhr-95;xtr-1;B0464.6;rpb-6;pho-13;F22B3.5;F54B3.2;dod-22;cdc-48.3;T12A7.6;T27D12.1;Y32F6B.1;Y56A3A.31;lgc-55;C04F5.9;cls-1;smc-5;C50D2.6;ugt-37;F23C8.3;F42C5.4;F46H5.4;R01B10.3;Y39A3CL.1;dnc-6;irld-65;ZK993.2;C15B12.9;F55C9.14;T05B4.14;bbs-2;gop-1;haf-1;hsf-1;mep-1;msh-5;osm-3;sri-18;taf-6.1;tln-1;vgln-1;ugt-43;F21C3.6;T24H10.4;Y40H7A.2;Y105E8A.27;C07F11.2;F18E3.10;ifo-1;K…
21ur-87	-1.1092	5.22639	0.00639128	0.212822	0.486311701213471 ± 0.0704044061722226	IV	14816660	14816680	+	21ur-87	elt-1;glc-1;mrp-8;ocr-1;twk-39;unc-9;glp-4;glb-12;srsx-31;ekl-1;F31E9.3;dhhc-12;M7.9;nduo-2;pdcd-2;asic-2;Y11D7A.9;Y57A10A.8;irld-20;ZK858.5;srz-4;C01B10.10;tbck-1;F52H2.7;lgc-30;T05B11.1;polq-1;thoc-5;cogc-4;cdh-12;F26G1.11;dsl-4;best-2;C10C5.4;clec-166;T02B5.3;C10E2.4;fbxc-50
21ur-2577	-2.84324	2.29217	0.00640284	0.212822	0.144434615300416 ± 0.0981456846293164	IV	14654283	14654303	-	21ur-2577	fars-1;gly-15;swsn-1;trp-2;epc-1;C51E3.6;aptf-3;nipi-3;M01F1.9;W04D2.4;dct-16;Y39B6A.8;Y116F11B.8;nep-9;cct-3;Y37E11AM.3;Y48G1A.1;cox-18;hxk-3
21ur-8821	1.68947	3.08079	0.0064491	0.212822	4.36496741628745 ± 0.0694219692349516	IV	15606460	15606480	+	21ur-8821	odd-1;pat-3;C06A1.6;F29D10.2;cpg-3;mam-5;T26E4.9;T26E4.10;gopc-1;C03G6.6;F14F9.3;F14F9.4;F53A9.3;Y54G2A.36;ZC123.1;C06A1.7
21ur-9853	1.65512	3.96254	0.0064524	0.212822	3.0346002490904 ± 0.529963306748068	IV	15802701	15802721	-	21ur-9853	cut-1;let-268;egas-2;K08D10.10;mltn-7
21ur-1951	1.68951	3.08079	0.00645394	0.212822	4.36496741628745 ± 0.0694219692349516	IV	15606461	15606481	+	21ur-1951	kin-29;lrk-1;odd-1;C06A1.6;F29D10.2;cpg-3;R13H4.8;T26E4.9;T26E4.10;C35E7.5;srab-11;dop-4;F14F9.4;ZC123.1;C06A1.7
21ur-3852	1.65511	3.96254	0.00645609	0.212822	3.0346002490904 ± 0.529963306748068	IV	15802698	15802718	-	21ur-3852	cdh-7;dyf-6;osm-6;str-130;sul-1;F13D12.8;F22E12.1;F40F12.7;T02C1.1;T13H5.1;Y38E10A.22;B0495.7;C26B9.5;F22F4.1;T03G6.1;Y82E9BR.2;srz-82
21ur-2298	-1.01284	5.71514	0.00671742	0.216544	0.496360872948794 ± 0.0809054137986833	IV	14224784	14224804	-	21ur-2298	acy-3;ark-1;lst-4;pos-1;pqn-75;srj-1;unc-84;dlat-2;hsd-1;C17A2.7;F02E11.3;T28D9.11;cdh-12;cdc-14;nhr-40;M02G9.2;R07A4.2;C06E4.8;nhr-186
21ur-6242	2.75772	3.36402	0.00684539	0.216662	5.27584223138195 ± 0.879119335798919	IV	16972840	16972860	-	21ur-6242	rig-4;cpn-2;daf-1;daf-2;gcy-7;haf-7;mex-1;mrp-7;nmy-2;sdc-2;srw-95;tdc-1;C17E4.2;C38D4.9;F25H8.1;F40F8.5;enpl-1;T05F1.7;anp-1;fbxb-1;mtr-4;Y116F11B.14;ZK856.4;C02F5.10;C35E7.5;W09C3.4;Y71G12B.22;Y71H2AM.1;Y82E9BL.18;cil-1	nmy-2;F25H8.1
21ur-2427	1.32783	4.66596	0.0068832	0.216662	2.42366654882693 ± 0.503707064100855	IV	5600999	5601019	+	21ur-2427	iglr-2
21ur-4721	1.32783	4.66596	0.00688325	0.216662	2.42366654882693 ± 0.503707064100855	IV	5600980	5601000	-	21ur-4721	B0464.6;F32H5.4;R11E3.2;atg-5
21ur-3773	1.21616	4.34332	0.00688393	0.216662	2.45751875950654 ± 0.318451095702055	IV	15582979	15582999	+	21ur-3773	fmo-4;gcy-22;mua-3;asns-1;psr-1;alg-4;vamp-8;lgc-43;C53D6.8;F28C6.4;T06C12.9;C39B5.6;upb-1;drd-5;svh-2;Y92H12A.4;alh-2;ocr-2;pif-1;str-90;tre-1;H25K10.1;K08C9.5;istr-1;Y57A10A.27;ZK218.11;C05D12.3;cnnm-1;slc-28.2;dip-2;F46H5.4;nlp-64;ttc-7;Y50D4C.5;Y54F10AM.8;Y57G7A.11;Y67D2.2;nhr-277;ZC239.20;rft-1;M01H9.10
21ur-4259	-1.11803	5.30024	0.00688513	0.216662	0.471846212782835 ± 0.0649715332923506	IV	16068755	16068775	-	21ur-4259	NA	NA
21ur-9426	-1.11803	5.30024	0.00688675	0.216662	0.471846212782835 ± 0.0649715332923506	IV	16068752	16068772	-	21ur-9426	fbxc-42
21ur-7646	1.32782	4.66596	0.00688869	0.216662	2.42366654882693 ± 0.503707064100855	IV	5600983	5601003	-	21ur-7646	apc-10;tag-124;lron-4;srm-6;T25C12.3;chil-11;kcc-2;zfp-3;dmsr-9;ZC513.2
21ur-5750	1.47339	5.28115	0.00690315	0.216662	2.59926348915349 ± 0.580445964479002	IV	14102889	14102909	+	21ur-5750	acr-2;anc-1;cdh-9;chs-1;dpy-22;ego-1;fmi-1;kgb-1;lig-1;lin-1;lir-2;mog-1;msh-5;nhr-69;npp-14;pek-1;pgp-4;pgp-9;pqn-41;rgs-7;srh-39;ttn-1;tbx-7;cpna-5;wts-1;chd-7;B0001.5;C11E4.6;C18E9.2;jmjd-3.3;gcp-2.2;secs-1;cfim-1;F54B11.11;K07A12.5;phf-33;M03C11.3;R11G10.2;nhr-271;T06G6.4;rmh-2;T23D8.3;T28B8.3;agef-1;fbxa-210;Y69H2.9;Y116F11B.7;ZK507.1;ZK507.3;nhr-246;ZK1053.4;cpna-2;vps-33.1;B0361.6;C06G3.6;…	ttn-1
21ur-11722	-1.14214	5.19226	0.00725265	0.223848	0.476895459609732 ± 0.108460692345428	IV	6602669	6602689	-	21ur-11722	pgp-10
21ur-2785	1.32848	4.08647	0.0073089	0.224547	2.88145423742532 ± 0.448249142876764	IV	14725187	14725207	-	21ur-2785	crn-4;mrp-7;F20G2.3;F37B12.3;T04F8.2;Y32B12B.4;C24D10.5;R10H1.1;irld-51	Y32B12B.4
21ur-3892	-1.46899	3.22867	0.00732278	0.224547	0.329213601399926 ± 0.133653661101473	IV	15002280	15002300	+	21ur-3892	aco-2;col-171;pod-1;rec-1;unc-94;C18E9.8;ceh-88;F53H4.4;T11B7.1;W04G5.3;cyp-34A9;C30G12.6;D1014.4;slc-28.2;F33H12.6;F35B3.7;F59H6.5;K09D9.1;K09E2.1;K09H11.4;R04B3.2;clec-125;Y16E11A.2;taf-6.2;Y46B2A.2;Y55B1BR.2;ZC404.7;ZK250.9;alr-1;C14E2.11
21ur-342	1.01867	5.21147	0.00737538	0.224547	2.06041679441798 ± 0.149561707798256	IV	15160810	15160830	+	21ur-342	ckb-1;Y26G10.1;Y76A2B.5;elo-9;paf-1;sre-1;sri-9;ugt-21;mob-2;orc-5;ZK643.2;tin-44;clik-1;fbxb-20
21ur-1265	1.01868	5.21147	0.0073858	0.224547	2.06041679441798 ± 0.149561707798256	IV	15160807	15160827	+	21ur-1265	fzr-1;gon-1;C10E2.1;F19F10.9;apn-1;dyf-6;gar-3;xpo-3;lst-1;pat-12;ppk-3;unc-33;C12D8.15;C31H5.7;C53B4.1;ser-5;F42G4.5;srap-1;Y75B8A.14;hum-10;F44A2.7;F45E1.1;fncm-1;acl-14;spat-3;eak-3
21ur-5155	-1.20175	4.68547	0.0074052	0.224547	0.440650398811373 ± 0.0474171584015842	IV	15347222	15347242	+	21ur-5155	NA	NA
21ur-15224	-1.20174	4.68547	0.00740931	0.224547	0.440650398811373 ± 0.0474171584015842	IV	15347219	15347239	+	21ur-15224	NA	NA
21ur-278	-1.14918	4.80706	0.00746918	0.225533	0.457836015351603 ± 0.109876844134965	IV	14221840	14221860	+	21ur-278	col-121;immt-2;fcd-2;Y75B8A.8;hizr-1;C23F12.3;F55F10.1;F55G1.1;H35B03.2
21ur-5140	1.25392	5.23354	0.00760442	0.226871	2.28760337627019 ± 0.405257804307487	IV	14099925	14099945	-	21ur-5140	cmk-1;emb-30;fce-1;hif-1;ndg-4;oat-1;rrf-3;ant-1.1;qns-1;C54G4.3;eif-2Bepsilon;F09A5.2;F19B6.1;F31C3.6;T11G6.5;T13H5.1;scpl-4;T28A8.6;rga-1;tdpt-1;B0303.7;C13A2.10;C16D9.5;F18E9.4;F52F10.2;H06I04.5;K11H12.7;T25E4.2;Y47G7B.2	ant-1.1
21ur-11682	-1.22978	4.33738	0.00762522	0.226871	0.452068278800017 ± 0.0922225311505084	IV	7266224	7266244	+	21ur-11682	F15D4.4;M110.7;Y82E9BR.1
21ur-1439	-1.8467	3.3479	0.00762626	0.226871	0.25662816019926 ± 0.0738796518670777	IV	13612687	13612707	+	21ur-1439	dhp-1;fog-1;let-363;mab-5;str-162;unc-80;C11H1.2;T13H10.2;Y53F4B.13;C30F12.3;H05C05.1;T14B4.1;T28D9.4;Y48G1A.1;T28B8.6;T06D4.6;rad-51;smp-1;lact-6;C49F8.1;gmeb-2;dld-1;lipl-4;brc-2;sssh-1;rad-8
21ur-14818	-1.22976	4.33738	0.00762951	0.226871	0.452068278800017 ± 0.0922225311505084	IV	7266227	7266247	+	21ur-14818	ptr-21
21ur-2119	-2.17149	2.64456	0.00763566	0.226871	0.224159251677436 ± 0.0395119868965757	IV	6183393	6183413	-	21ur-2119	glp-1;pqn-85;srj-26;dhc-3;C23H4.6;fbxa-188;F07E5.4
21ur-7230	-1.21371	5.05057	0.00765724	0.226907	0.443753263380348 ± 0.144878454044721	IV	16795856	16795876	+	21ur-7230	NA	NA
21ur-2662	2.27981	2.9822	0.00775436	0.227054	6.04379840480356 ± 1.85878702157995	IV	14321652	14321672	+	21ur-2662	Y87G2A.13;F46F5.10;fbxa-224;glr-7;pqn-85;glct-2;F42G4.6;oac-44;oac-45;T28F4.1;Y67A10A.3;Y81G3A.1;C52B9.8;snpc-1.3;H20E11.2;Y20F4.8
21ur-15237	2.14192	3.45344	0.00779415	0.227054	3.85517595257393 ± 0.363667868163921	IV	16207349	16207369	+	21ur-15237	ncx-6;rib-2;srh-277;srv-10;C07C7.1;repo-1;Y64G10A.2;Y106G6D.5;F07C4.12;F18E9.4;teg-4;irld-42;Y67D8A.2;M04C3.5
21ur-10619	2.14192	3.45344	0.00779461	0.227054	3.85517595257393 ± 0.363667868163921	IV	16207348	16207368	+	21ur-10619	srh-277;pals-24;cyp-31A3
21ur-14619	2.14192	3.45344	0.00779469	0.227054	3.85517595257393 ± 0.363667868163921	IV	16207351	16207371	+	21ur-14619	nstp-1;nhr-175;swan-1;oac-10;npr-28;teg-4;K03C7.3
21ur-597	2.14191	3.45344	0.00779858	0.227054	3.85517595257393 ± 0.363667868163921	IV	16207352	16207372	+	21ur-597	swan-1;npr-28;teg-4
21ur-5650	4.71428	2.18978	0.00785408	0.227054	58873204401507040 ± 8735800524595886	IV	6028544	6028564	-	21ur-5650	ced-3;gon-1;lam-3;nas-16;rsd-2;C25D7.10;ubr-5;ric-7;M106.2;dkf-2;oac-49;nhr-230;ZK938.1;C03B1.7;F56A4.5;pde-4;Y45G12C.4
21ur-9913	4.71428	2.18978	0.00785408	0.227054	58873204401507040 ± 8735800524595886	IV	6028547	6028567	-	21ur-9913	arl-3;ceh-18;emb-4;let-653;lrp-1;phf-5;pqn-22;pqn-85;unc-22;xol-1;ceh-79;mrps-31;F14B6.6;T03F7.7;W04E12.2;Y39B6A.33;Y53C12A.3;ZK1321.4;C13A2.10;eif-2D;C42D8.1;uri-1;D1005.2;F46F5.11;F52C9.3;zmp-2;dgk-5;Y39A3A.2;Y40C7B.1;Y52D5A.2;xpc-1;mrt-1;C27A2.12;K09D9.14
21ur-12775	4.71428	2.18978	0.00785408	0.227054	58873204401507040 ± 8735800524595886	IV	6028549	6028569	-	21ur-12775	cah-2;let-653;mog-5;pqn-85;qui-1;srp-8;twk-44;unc-22;C06H2.7;swsn-7;K10C3.4;chil-19;chil-21;R09D1.14;T04F3.4;Y17G7B.18;Y57G11B.3;C10G11.6;D1005.2;F16H11.1;F48E3.8;F52C9.3;T10F2.2;Y55F3AM.9
21ur-396	2.90118	2.47316	0.00793956	0.227054	9.0559299486601 ± 1.74376115561257	IV	15137752	15137772	+	21ur-396	acr-12;bbs-2;cdk-4;cpr-5;csp-2;dhc-1;dig-1;dim-1;exc-7;gei-14;gex-2;gop-1;grp-1;hcp-4;ima-3;iars-2;kup-1;ect-2;let-418;lin-2;mbk-1;mec-1;nas-31;paf-1;plc-1;pqn-22;ret-1;sex-1;spr-5;sys-1;hdl-2;abcf-1;tbx-36;unc-38;leo-1;madf-5;C07A4.2;C08F11.3;chil-2;fipr-7;fipr-6;wdfy-3;C35A5.5;pfk-1.2;ttll-5;D1053.2;set-8;fbxa-45;F13G3.10;F14H3.3;F26H11.4;F32B6.10;F36A2.3;mam-7;F49E2.5;nep-17;F56A8.5;pot-2;golg…
21ur-625	2.90118	2.47316	0.00794507	0.227054	9.0559299486601 ± 1.74376115561257	IV	15137755	15137775	+	21ur-625	trr-1;Y20C6A.1;C53D5.1;Y22D7AR.14;dyf-2;eat-5;nmr-1;snf-11;tre-2;trp-4;uba-2;B0001.2;C23H4.2;pals-39;F23H12.5;pkn-1;K10C3.5;M04C3.1;abhd-11.2;atln-2;ZK643.6;C18E3.9;oac-12;F21C10.7;fbxb-106;Y37E3.1;R01H2.7	K10C3.5
21ur-2995	1.45031	3.6051	0.00797936	0.227054	3.18387075313451 ± 0.172580045502473	IV	14122316	14122336	-	21ur-2995	clh-2;clh-6;dhs-29;dpy-22;fmo-3;gcy-19;gcy-37;mdf-1;ric-19;sru-19;B0024.15;B0564.7;C09H10.5;F01G10.5;aptf-3;F45H10.2;F54D1.6;H13N06.2;K02B12.5;mask-1;VF13D12L.3;Y6E2A.7;arrd-5;cyp-13A10;B0205.1;C02D5.2;C35E7.4;met-1;D2096.10;math-26;math-27;F37A4.4;nstp-8;F59E11.7;R05H11.1;R08E3.1;Y32H12A.8;Y39A3CL.1;srbc-64;Y48G1C.10;Y55F3BR.6;ZK563.2;ZK1290.1;tag-241;C45G3.3;him-4;xpo-3;mbk-1;pcm-1;pkc-2;scc-3;…
21ur-15338	1.66933	4.50099	0.0080226	0.227054	2.77471348440766 ± 0.35357557358526	IV	14493922	14493942	-	21ur-15338	lat-2;pmp-5;ptr-10;sra-38;sru-44;srw-112;tag-4;tre-4;vars-1;B0334.5;hasp-1;C23H4.4;F01G10.9;F11F1.4;usp-33;sqst-1;slc-17.4;W02H3.1;gcl-1;lgc-55;irld-61;ZK1086.3;cpna-2;C35E7.5;F02C9.2;F40H6.5;cyp-25A6;ger-1;R13A5.11;T28C12.2;Y50D7A.3;F11F1.8;W03G9.8
21ur-5511	1.66924	4.50099	0.00803332	0.227054	2.77471348440766 ± 0.35357557358526	IV	14493923	14493943	-	21ur-5511	inx-10;lat-2;sra-38;srd-5;sru-44;srw-51;B0334.5;C07A9.9;C23H4.4;gadr-2;gale-1;F01G10.9;sqst-1;W02H3.1;ZK1086.3;hosl-1;sre-55;fbxb-111;F22E5.1;F40H6.5;gadr-3;cyp-33C8;Y27F2A.6;ttc-37;Y50D7A.3;W03G9.8
21ur-6082	1.66915	4.50099	0.00804418	0.227054	2.77471348440766 ± 0.35357557358526	IV	14493926	14493946	-	21ur-6082	cdf-1;oma-1;sri-33;srx-134;top-1;glb-8;cfim-2;swsn-2.2;C50E3.11;ets-6;gadr-3;K03B4.2;R151.2;trap-2;Y97E10B.1;C47E12.14;F41E6.15;Y71F9AM.8;D1046.18
21ur-9428	1.66906	4.50099	0.00805503	0.227054	2.77471348440766 ± 0.35357557358526	IV	14493931	14493951	+	21ur-9428	pqn-85;C34C12.7;F25B3.2;acdh-9;rfip-1;R05D3.9;Y48G1C.5;K09F5.6
21ur-12318	-1.33363	4.33924	0.00806976	0.227054	0.383104341915116 ± 0.0625022261415594	IV	6459407	6459427	-	21ur-12318	dpy-21;eef-1A.2;hch-1;ire-1;let-653;lpd-3;nhr-60;nhr-67;snr-1;chd-7;C14B4.2;C16C10.8;tbc-19;npr-10;F40F8.5;uso-1;K12D12.5;Y38H6C.8;tat-1;C16A3.6;ift-74;cyp-33C9;F10G7.10;che-10;F44E2.7;athp-2;ccep-290;Y71H2AM.15;W03D8.11
21ur-6318	1.1836	4.83173	0.008131	0.22774	2.30324323530515 ± 0.480671204477084	IV	13998026	13998046	-	21ur-6318	inx-1;nmr-1;tag-51;Y49E10.21;Y53F4B.13;shk-1;R02C2.7;ttr-42
21ur-15137	1.1836	4.83173	0.00813505	0.22774	2.30324323530515 ± 0.480671204477084	IV	13998025	13998045	-	21ur-15137	gop-1;nmr-1;sri-24;chil-6;chil-9;shk-1;mig-39;pck-1;ttr-42
21ur-6284	1.31729	3.35757	0.00819266	0.228779	3.19533715756537 ± 0.292711985066322	IV	14275597	14275617	+	21ur-6284	hst-6;inx-15;let-4;lrp-2;rpl-18;rpm-1;tps-2;F07C6.4;mon-2;scav-4;ztf-26;oac-37;T04F8.6;clec-256;sta-1;coa-6;C34D10.2;C50F7.9;cla-1;F57C9.4;R08E3.1;hasp-2;Y34B4A.7;toe-1;syd-9;Y51B9A.14;T28D9.16
21ur-8883	1.23902	5.6937	0.00822051	0.22881	2.20844067891458 ± 0.278464145200937	IV	14617170	14617190	+	21ur-8883	acr-8;apx-1;pqn-10;slo-1;rpoa-12;C45B11.2;fbxb-69;arrd-24;clec-142;K11H3.3;lsd-1;Y75B8A.13;math-6;C17H12.12;M01E11.1;T04B8.5;W06B4.2
21ur-6270	-1.12971	6.80742	0.00832447	0.22881	0.465819331916298 ± 0.0903384112443919	IV	14031989	14032009	-	21ur-6270	cpr-1;rig-1;rpl-5;C46A5.4;ZK813.4
21ur-38	1.14411	7.69722	0.00833165	0.22881	2.22099400308302 ± 0.782352491859173	IV	16789030	16789050	+	21ur-38	nhr-13;F32D8.12;lgc-1;F32D8.11	nhr-13
21ur-9583	1.03967	5.03355	0.00833946	0.22881	2.05666090222909 ± 0.292024430287721	IV	15897362	15897382	-	21ur-9583	col-116;odr-1;pms-2;str-57;madd-3;ZK1053.1;attf-4;C17C3.1;K10B4.3;T04C12.33
21ur-2794	1.03967	5.03355	0.00834265	0.22881	2.05666090222909 ± 0.292024430287721	IV	15897358	15897378	-	21ur-2794	ced-4;sru-25;srw-130;str-159;B0250.8;idh-2;pxd-1;F49E12.12;Y54G11A.11;ugt-6;atg-18;srsx-8;F53B3.6;ilcr-2;bgal-2;M04F3.5;ceh-54;Y75B7AL.2;ZC196.4;ZK154.6;Y57G11C.52
21ur-8986	-1.08183	5.45679	0.00836043	0.22881	0.489789069674705 ± 0.066046182407439	IV	5596060	5596080	-	21ur-8986	amx-2;cdh-5;dnc-1;gcy-25;lin-13;msh-2;tag-51;try-5;unc-8;tufm-1;trr-1;spe-44;rilp-1;C50B6.7;F32D8.8;mtcu-2;H05L14.1;K10H10.6;slc-17.4;cyp-33D3;Y53F4B.9;B0261.6;C36C9.4;K12D9.1;R02F11.3;R04A9.3;T01G6.10;T25D1.2;T26A8.1;Y40C7B.5;xpc-1
21ur-7186	-1.08181	5.45679	0.00836543	0.22881	0.489789069674705 ± 0.066046182407439	IV	5596056	5596076	-	21ur-7186	NA	NA
21ur-14751	-1.00721	6.47813	0.00844066	0.229397	0.509552318832753 ± 0.0616560853627948	IV	6051773	6051793	-	21ur-14751	lin-12;pqe-1;sma-6;str-246;clec-24;T28D9.16
21ur-2322	-1.0072	6.47813	0.00844641	0.229397	0.509552318832753 ± 0.0616560853627948	IV	6051770	6051790	-	21ur-2322	ptr-3;sro-1;wht-6;C49F5.6;srbc-8
21ur-10318	1.49561	4.70453	0.00851408	0.229397	2.66813708870132 ± 0.552388278894484	IV	15974494	15974514	+	21ur-10318	che-3;baz-2;gly-19;str-246;tre-1;F44E5.4;F44E5.5;F54E4.3;T01G5.1;T22C8.3;ZK1320.9;C05D9.3;C06E4.3;C16B8.2;C39D10.6;otpl-2;fbxb-11;otpl-5;F58E2.3;M70.5;T12A2.5;Y73B3A.4;ZC155.4;H06H21.11
21ur-5065	-1.2568	4.15367	0.00857448	0.229397	0.432746718669447 ± 0.108778461007392	IV	17199377	17199397	+	21ur-5065	sex-1;algn-13
21ur-5147	2.90162	2.47558	0.00859141	0.229397	9.3335547162986 ± 2.09455412973183	IV	16259546	16259566	+	21ur-5147	T14G10.5
21ur-2815	2.90162	2.47558	0.00859891	0.229397	9.3335547162986 ± 2.09455412973183	IV	16259547	16259567	+	21ur-2815	srv-31;B0454.6
21ur-10660	2.3725	3.04965	0.00860482	0.229397	6.41658759283267 ± 2.5955791009715	IV	15856015	15856035	-	21ur-10660	dnj-28;grl-14;him-4;srw-133;nkb-1;C26E1.1;C34C12.2;cyp-25A2;C30G12.1;C55B6.1;F42A9.7;fbxb-49
21ur-11553	2.90162	2.47558	0.008606	0.229397	9.3335547162986 ± 2.09455412973183	IV	16259551	16259571	+	21ur-11553	aass-1
21ur-3412	2.97109	2.49143	0.00863605	0.229649	12.3725788427289 ± 2.80622916276164	IV	15381743	15381763	+	21ur-3412	cat-4;srh-17;str-66;lron-1;ctc-1;T01D3.6;Y53C12B.1;Y57G11B.5;ugt-16;daf-10;hpr-17;kin-6;srh-131;unc-94;ntr-2;K09E4.4;lact-9;Y116A8C.33;best-22;ZK1053.4;ZK1307.8;C30G12.6;F10G7.10;T01G6.1;rbm-5;T19D12.5;ZK105.6;K07E3.9	lact-9
21ur-5194	1.33719	4.5351	0.00880646	0.231966	2.39131362399309 ± 0.276192364543425	IV	16149479	16149499	+	21ur-5194	fer-1;frm-10;ltd-1;rgs-7;snf-10;atx-3;lgc-31;nhr-192;zmp-4;ZK1225.5;dcaf-1;F18F11.4;lgc-30;F22E5.21;mrt-1;Y39F10C.3;rpm-1;srh-140;unc-36;tag-189;E03H4.2;F10A3.12;F58H1.5;uda-1;nduo-4;R05D11.5;Y116F11A.6;ZK1128.3;C13E3.1;F07B7.12;F55C12.4;T04A6.3;T19C3.5;Y22D7AL.9;szy-2;folt-3
21ur-2926	1.23728	5.04347	0.00887487	0.233216	2.28181200549818 ± 0.336544011573496	IV	14350841	14350861	+	21ur-2926	clc-5;drh-1;eat-4;baz-2;nrde-4;hsp-6;ncs-2;ptr-13;unc-34;utp-20;C17E4.1;acs-19;F02C12.2;F59C6.11;K10D6.4;R07E5.4;T01H3.2;lgc-13;Y73F8A.23;Y116A8C.11;ZK669.3;C11D2.4;F43C11.6;F46G11.2;F59E11.2;Y37B11A.2;hpo-29;daao-1;F13H10.8;Y52B11A.12;C07A12.18	hsp-6;R07E5.4
21ur-439	-2.49941	2.41672	0.00922488	0.240149	0.163513223607043 ± 0.0722292334175053	IV	17074616	17074636	+	21ur-439	lars-2;ccar-1;pgp-4;srg-60;F26C11.1;F59C6.8;dmsr-6;hex-5;snx-13;C34B2.8;memo-1;eri-7;ipla-5;nep-22;slc-17.1;lrp-1;C29F5.8
21ur-6066	1.02156	6.60847	0.00927131	0.240235	2.00293302872204 ± 0.531419752122694	IV	15631615	15631635	+	21ur-6066	cdc-14;dim-1;dlk-1;elt-2;glh-1;gly-14;srh-67;srh-68;srh-69;sru-40;srx-12;srx-90;srx-93;tsp-19;unc-97;best-1;C07B5.4;F29D10.1;parn-1;T09E11.8;T24B1.1;Y51A2D.1;Y54E2A.8;Y75B8A.7;ZK643.7;C02B10.5;ztf-3;D1007.15;dex-1;cst-1;F59A3.8;H35B03.2;fbxb-32;T04B8.5;ttr-30;T10B5.4;acdh-7;srt-63;T28C12.1;nphp-2;Y71F9AL.11;dss-1;ZK381.8;gfrp-1;F44F4.15
21ur-8611	1.9418	3.292	0.00931826	0.24052	3.51898816447396 ± 0.316283307480038	IV	14857682	14857702	+	21ur-8611	aex-3;cdh-4;emb-9;ggr-3;mel-32;mup-4;ptr-2;sli-1;suf-1;unc-40;C11H1.5;fbxb-65;C50F4.1;ugt-44;F13D2.1;tag-314;tag-290;clec-32;fbxa-69;capg-2;M03B6.3;T25B9.4;T26H8.4;Y46G5A.35;clec-194;nep-1;fbxb-70;hsp-110;C33E10.8;fbxb-88;F26G1.1;H18N23.2;T05C3.6;jhdm-1;Y54E10BR.2;fbxa-75;ZK546.5;Y2H9A.6;F55C12.19
21ur-4539	1.44137	3.70468	0.00938879	0.241037	2.74489809155125 ± 0.205375824380031	IV	14976503	14976523	+	21ur-4539	anc-1;str-18;str-31;stip-1;seb-2;B0252.1;C45H4.14
21ur-1589	1.04196	8.49299	0.00957658	0.241955	2.05204662092125 ± 0.621495561558522	IV	16166988	16167008	-	21ur-1589	ego-1;fbxa-158
21ur-10722	-1.84597	2.91698	0.00961496	0.242375	0.277231395710436 ± 0.0111163544372675	IV	5320693	5320713	-	21ur-10722	eat-2;glb-12;cyp-37A1;F11D5.1;T06A4.3;T27C4.1
21ur-6173	-2.22156	2.90574	0.00969895	0.243849	0.245324136384862 ± 0.118809394572967	IV	16704283	16704303	-	21ur-6173	NA	NA
21ur-5737	-1.36865	3.78659	0.00984742	0.245271	0.391405591746993 ± 0.0155112752250384	IV	5426063	5426083	-	21ur-5737	kin-20;Y61A9LA.3
21ur-15250	-1.36864	3.78659	0.00985237	0.245271	0.391405591746993 ± 0.0155112752250384	IV	5426062	5426082	-	21ur-15250	NA	NA
21ur-12411	-3.26452	2.06012	0.0098619	0.245271	0.0599591006063679 ± 0.0565157432151749	IV	15300294	15300314	+	21ur-12411	pqn-8;srv-9;C18E9.5;Y15E3A.5;mlck-1;M02H5.8

## Sheet: comparison 2
piRNA	logFC	logCPM	PValue	FDR	fc_sem_basedOnpseudo.counts	chr	startPos	endPos	strand	ID	Targets	Clash Supported Targets
21ur-7683	1.81643	4.71627	0.000129075	0.729018	3.56920003563697 ± 0.294692165648797	IV	14610233	14610253	+	21ur-7683	asp-6;cah-6;csn-6;cyk-3;let-653;nhr-49;pcp-3;pmk-3;srx-102;swp-1;wsp-1;C09G1.4;nhr-27;haly-1;usp-33;ctc-3;tat-1;Y69H2.1;ccdc-47;ZK1067.4;pks-1;F26F12.4;F53G2.1;K04F10.2;R193.2;T04C9.1;T19D12.1;T19D12.2;ZK154.5;frh-1;Y67A10A.3
21ur-11395	1.81643	4.71627	0.000129075	0.729018	3.56920003563697 ± 0.294692165648797	IV	14610238	14610258	+	21ur-11395	F38B2.4;T16G1.5;nhr-288;fic-1;btb-5;manf-1;igcm-4
21ur-9518	-1.22932	5.88059	0.00138153	1	0.430420203722972 ± 0.0538961038674027	IV	6015472	6015492	-	21ur-9518	gei-13
21ur-6166	-1.22931	5.88059	0.00138328	1	0.430420203722972 ± 0.0538961038674027	IV	6015469	6015489	-	21ur-6166	F44G4.6;pitr-2;ets-6
21ur-9620	1.30585	5.37892	0.00255157	1	2.68926023064577 ± 0.551023472298206	IV	17073013	17073033	+	21ur-9620	ced-13;csn-3;gst-20;pars-2;ell-1
21ur-4691	-1.51451	5.19834	0.00259136	1	0.357433957320328 ± 0.0572255396538354	IV	16674948	16674968	+	21ur-4691	srx-33;F13E9.11;mus-101
21ur-6534	-1.827	3.7278	0.00319463	1	0.271525226472454 ± 0.104633228239869	IV	16436154	16436174	-	21ur-6534	alh-3;mrp-1;pgp-2;F13C5.3;F59E11.7;T10B5.8
21ur-3007	2.5518	2.99972	0.00366875	1	8.81642387136063 ± 0.66752278325138	IV	16718868	16718888	-	21ur-3007	ifg-1;nhr-48;vglu-2;fbxb-72;Y48G1C.8;nlp-58;acr-16;glc-4;rbm-26;hpo-27;oac-9;hda-6
21ur-4867	2.20222	3.50735	0.00368703	1	5.90124895050801 ± 1.91548521156331	IV	16448403	16448423	-	21ur-4867	che-11;ego-2;gly-3;gon-2;klp-12;lrp-1;ocr-1;snf-6;T08G11.1;Y37A1B.4;prp-6;ZC84.1;spv-1;acer-1;F44A2.3;H01M10.2;sgca-1;T10E10.4
21ur-10780	-1.41852	4.68666	0.00371286	1	0.386390527886687 ± 0.0873163337528222	IV	15171423	15171443	+	21ur-10780	mrp-3;T07F12.4;T22B2.5;pinn-1;tag-281;ZK1010.12
21ur-1762	-1.4185	4.68666	0.00371653	1	0.386390527886687 ± 0.0873163337528222	IV	15171426	15171446	+	21ur-1762	asb-2;lin-31;pod-2;pqn-80;C49F5.6;F49E2.2;ceh-91
21ur-13073	-1.41849	4.68666	0.00371763	1	0.386390527886687 ± 0.0873163337528222	IV	15171422	15171442	+	21ur-13073	R01E6.7;F56D2.2;cec-6
21ur-12752	1.79776	4.03047	0.00439424	1	4.14077096521025 ± 1.59394878582234	V	16319146	16319166	+	21ur-12752	str-20;zag-1;rad-26;acox-1.1;cht-2;rpoa-1;ncam-1;Y55F3BR.1;cpsf-1;ZK652.6
21ur-13418	-2.48195	3.29656	0.0048142	1	0.155931944759737 ± 0.152887615598418	IV	15338237	15338257	-	21ur-13418	irld-59;ZK1225.1
21ur-5029	2.24741	3.16068	0.00531479	1	6.13519198290783 ± 0.765121627833305	IV	15495936	15495956	-	21ur-5029	bli-4;col-138;gei-4;klp-3;lin-25;lrk-1;pept-2;swsn-1;rab-30;sra-9;sra-34;srh-78;srh-125;srx-76;tag-131;twk-1;unc-9;unc-60;leo-1;fshr-1;papl-1;nspb-11;F53B7.4;M01G12.6;abce-1;pisy-1;Y56A3A.16;VM106R.1;B0207.6;hpo-28;C06A5.6;viln-1;C27D9.1;C33C12.10;C52A10.1;F14B8.5;F42A6.1;F42A9.3;sdz-18;F56H1.3;mps-2;dgk-5;cid-1;lgc-12;T19C3.3;cdap-2;spsb-2;Y55H10A.2;klu-2;ZK1248.19;Y51F10.11;T05C7.8
21ur-515	1.46434	4.67974	0.00626082	1	2.53924425582405 ± 0.217943087746885	IV	15487158	15487178	-	21ur-515	chc-1;sulp-1;feh-1;gcy-4;max-2;pqn-85;ptr-13;sra-21;srd-25;sre-2;srh-145;srx-80;rhgf-1;C34C12.8;fbxa-140;C48B4.3;srsx-31;R10E8.5;aakg-5;T01H3.2;prmt-7;tbc-17;Y52B11A.3;Y57G11C.38;Y57G11C.46;Y62H9A.14;oac-56;C14C11.4;C15F1.5;F10G7.10;F25E5.4;cdk-2;T02G5.3;tftc-1;ZK652.6;ZK688.5;ZK418.10;F13E9.15
21ur-7424	1.46434	4.67974	0.0062611	1	2.53924425582405 ± 0.217943087746885	IV	15487161	15487181	-	21ur-7424	daf-15;dnj-25;kgb-1;mat-1;sym-4;tag-120;ugt-17;C46F11.4;F10A3.4;K07F5.16;T02G6.5;ztf-17;T11F9.10;lpr-3;C09B8.3;C35D10.1;C38C3.3;C48E7.6;F09F7.5;F25E5.4;dhhc-3;F40G9.14;F56E10.1;abts-3;cgt-3;K10B4.1;mks-1;scl-17;C30G7.3
21ur-4545	1.39077	4.07952	0.00650117	1	3.10863604495685 ± 0.536634940404297	IV	15297370	15297390	+	21ur-4545	hda-10;str-136;xol-1;nduo-6;ZC376.6;C32D5.7;T27A10.2;ZK973.11
21ur-7816	1.27213	4.38918	0.00727662	1	2.82678825547557 ± 0.27377491912362	IV	16060860	16060880	-	21ur-7816	adr-2;bpl-1;cdh-4;gei-13;gld-3;itr-1;osm-6;ppw-1;ptr-2;rbd-1;scm-1;sod-4;srg-5;sphk-1;cdt-2;T26C5.2;W09H1.1;Y69H2.10;cand-1;exoc-8;B0495.7;tdo-2;C40A11.6;C40A11.7;F07E5.7;F09F9.2;F46G11.2;sago-2;K09F6.6;zfp-3
21ur-12955	1.27219	4.38918	0.00729232	1	2.82678825547557 ± 0.27377491912362	IV	16060857	16060877	-	21ur-12955	cnk-1;ggr-2;nmr-1;W07G4.5;B0207.5;C01C10.2;toe-2;F28B4.3;wago-10;K12C11.6;C05E4.15
21ur-10993	-1.18672	4.91301	0.00732978	1	0.443354838075366 ± 0.090001922627007	IV	6042855	6042875	+	21ur-10993	daf-11;dhc-1;dnj-8;ina-1;myo-1;nmy-1;orc-2;stam-1;rbg-1;sru-15;mrck-1;dgk-4;ubc-17;tln-1;unc-104;vha-12;zyg-9;chd-7;C15H7.3;C18E9.8;C27D8.3;C32H11.5;C50F4.4;din-1;mrpl-13;F25H2.6;F26A3.7;F26E4.7;F33H1.4;F39H11.1;F40F11.4;H37A05.2;K01D12.6;R08D7.7;R10E4.7;T03D8.6;T06D8.2;hpo-5;alh-13;nmy-3;Y32B12B.2;Y49E10.21;Y51A2B.6;Y54E5B.2;ZK858.2;B0507.6;B0507.8;B0563.6;C09E7.8;math-7;C38C3.6;F01G12.1;ugt-41;…
21ur-5271	1.46306	4.45537	0.00745983	1	2.8764086719139 ± 0.794694149970221	IV	16103522	16103542	+	21ur-5271	dhp-1;set-2;srg-51;unc-70;mct-2;srbc-2;srbc-1;mct-1
21ur-7066	1.27028	4.62069	0.00779186	1	2.4131195339692 ± 0.296062763134777	IV	5889009	5889029	-	21ur-7066	srw-61;C09G9.5;T20D4.15
21ur-10911	1.27028	4.62069	0.00779382	1	2.4131195339692 ± 0.296062763134777	IV	5889006	5889026	-	21ur-10911	Y34D9A.3
21ur-2518	-4.66645	2.62549	0.00815209	1	1.45536166586994e-17 ± 0	IV	14366277	14366297	+	21ur-2518	scl-18;srz-23;Y102A11A.9
21ur-12041	-1.1863	6.15497	0.00876762	1	0.430410641658469 ± 0.026791893457335	IV	15936923	15936943	-	21ur-12041	div-1;fzo-1;hcp-1;prk-1;rol-3;spd-5;C07B5.6;set-32;F15B9.8;atz-1;F35E8.7;ubr-5;F36F2.2;Y75B12B.11;sql-1;ZK822.4;cpna-2;daf-37;F52G3.3;F54H12.5;irld-45;T05A7.6;srt-62;cdh-12;lfi-1
21ur-4872	-1.18631	6.15497	0.00877094	1	0.430410641658469 ± 0.026791893457335	IV	15936922	15936942	-	21ur-4872	ced-11;coq-5;div-1;klp-20;prk-1;ubr-5;clec-29;Y75B12B.11;exoc-8;sql-1;pyk-2;cpna-2;daf-37;F52G3.3;F54H12.5;polq-1;lfi-1

## Sheet: comparison 3
piRNA	logFC	logCPM	PValue	FDR	fc_sem_basedOnpseudo.counts	chr	startPos	endPos	strand	ID	Targets	Clash Supported Targets
21ur-5985	-2.27219	6.01039	3.19717e-08	0.000179061	0.201955451536429 ± 0.0339613819296362	IV	13971956	13971976	-	21ur-5985	tsp-15;D2045.2;H04D03.3;T07D10.1;oac-23;strm-1;rde-10
21ur-1080	-2.27221	6.01039	3.21127e-08	0.000179061	0.201955451536429 ± 0.0339613819296362	IV	13971963	13971983	+	21ur-1080	tsp-11;T22C8.1;Y54E5A.7;npr-17;srz-69;eat-3;fzo-1;lag-1;cnc-7;otpl-8;lgc-25;T13H5.1;Y48C3A.14;srt-69;nhr-152;srt-4;sre-51;D1044.6;F38A5.2;R12C12.9;Y71G12B.6
21ur-7241	-3.17172	3.06761	7.71e-06	0.0286606	0.105441443843898 ± 0.00836986846622433	IV	13976827	13976847	-	21ur-7241	NA	NA
21ur-8268	2.13609	3.89287	0.00184396	1	4.35984022987069 ± 0.971297440437532	IV	14353167	14353187	-	21ur-8268	dnj-13;dpy-22;lpd-6;lys-3;nas-15;pis-1;pqn-21;rgs-1;rrf-1;srh-38;str-243;sym-4;arrd-3;twk-14;twk-31;igdb-2;C33B4.4;C53A5.11;F02C12.1;mlt-9;phf-31;wht-5;F34D10.6;fbxa-181;F47G9.4;F54F12.1;golg-4;fozi-1;ptp-4;pelo-1;ztf-17;oac-46;T24B8.3;T27D12.1;Y6E2A.5;slc-25A46;Y51A2D.13;Y105C5A.1;C05C8.8;hex-2;math-14;math-7;C17G10.1;anat-1;E01A2.1;ddx-23;skpo-3;rpb-4;F53B1.2;F56D2.3;H34I24.1;M57.1;T05H4.10;mat…
21ur-2046	-2.21866	2.65487	0.00266792	1	0.211431760293899 ± 0.112551503916371	IV	13600852	13600872	+	21ur-2046	emb-5;hcp-4;unc-52;unc-68;C15H7.3;rga-5;Y116A8C.37;F56C9.3;lipl-4;T12E12.3
21ur-2662	2.17907	2.99154	0.00293244	1	5.76453691525189 ± 0.647605450781505	IV	14321652	14321672	+	21ur-2662	Y87G2A.13;F46F5.10;fbxa-224;glr-7;pqn-85;glct-2;F42G4.6;oac-44;oac-45;T28F4.1;Y67A10A.3;Y81G3A.1;C52B9.8;snpc-1.3;H20E11.2;Y20F4.8
21ur-784	1.50704	3.89187	0.00399305	1	3.50344093179928 ± 0.196514580789429	IV	16749651	16749671	-	21ur-784	chc-1;K08A2.1
21ur-4691	-1.29359	5.13121	0.00400064	1	0.42305340757472 ± 0.0474892679858462	IV	16674948	16674968	+	21ur-4691	srx-33;F13E9.11;mus-101
21ur-8822	1.62267	4.17208	0.00404903	1	2.98580453900368 ± 0.191900531655847	IV	16282921	16282941	+	21ur-8822	rgs-11;spd-3;spr-4;unc-22;clec-11;nhr-205;ZK1307.9;snpc-1.1;F09C12.8;F29B9.8;F43C9.2;F43C11.1;F48E8.4;nep-2
21ur-9622	1.62267	4.17208	0.00405439	1	2.98580453900368 ± 0.191900531655847	IV	16282922	16282942	+	21ur-9622	sap-49;spr-4;str-48;unc-22;C32C4.3;ceeh-2;T21B10.3;snpc-1.1;F39C12.1;F43C9.2
21ur-5271	1.58379	4.53974	0.00429189	1	3.10853379158029 ± 0.981221206697192	IV	16103522	16103542	+	21ur-5271	dhp-1;set-2;srg-51;unc-70;mct-2;srbc-2;srbc-1;mct-1
21ur-10302	1.42	3.82641	0.0047941	1	3.28614487577684 ± 0.465546315117841	IV	15615085	15615105	-	21ur-10302	col-83;grl-1;mut-7;set-31;smcl-1;srsx-26;tkt-1;ipla-2;cwp-5;glo-3;dnpp-1;F13B6.1;M03F8.6;tin-44;Y40C7B.1;plep-1;Y58A7A.4
21ur-15416	1.19987	4.79923	0.00512411	1	2.37519514010113 ± 0.285063993079683	IV	17210217	17210237	+	21ur-15416	col-19;rab-39;srg-55;F25H9.7;K04H4.2;R02D5.6;flh-2;fbxb-114;K09C4.10;egrh-3
21ur-5794	1.19988	4.79923	0.00513168	1	2.37519514010113 ± 0.285063993079683	IV	17210220	17210240	+	21ur-5794	dnj-24;oct-2;srw-10;nduf-2.2;C17D12.7;K07A1.1;nuo-6;oac-40;R05F9.7;erfa-1
21ur-6665	2.42181	2.77607	0.0053532	1	6.79870066706101 ± 0.484495757407031	IV	16378294	16378314	-	21ur-6665	C03B1.6
21ur-12421	2.41225	2.76803	0.00595142	1	6.69653008588517 ± 0.929081777877797	IV	16013978	16013998	-	21ur-12421	col-20;gex-3;parg-1;sid-1;smf-2;srh-95;str-94;unc-40;wdfy-3;srbc-82;C47E12.3;pfas-1;C39D10.7;F41G3.6;tag-234;K05F6.4;ZK1248.15;C09B9.85
21ur-8010	2.41224	2.76803	0.0059668	1	6.69653008588517 ± 0.929081777877797	IV	16013979	16013999	-	21ur-8010	col-20;sid-1;srh-95;str-94;unc-89;ugt-44;pfas-1;ain-1;F39C12.1;sdz-18;tag-234;K05F6.4;aagr-2;T23B12.5;ZK380.4;F23D12.10;C09B9.85
21ur-13042	2.03993	3.4323	0.00614584	1	4.89469945085657 ± 1.74442487044015	IV	14325239	14325259	+	21ur-13042	daf-9;dcap-2;nhr-134;ocr-3;smg-1;str-87;unc-5;F22D6.2;F58H1.2;hpo-4;ekl-6;npr-34;gmeb-1;srt-64;tbck-1;ubr-4;cyp-33E1;C52E2.4;F23H11.4;F46F11.7;math-41;Y22D7AR.2;C13A2.12
21ur-3731	2.03993	3.4323	0.00614823	1	4.89469945085657 ± 1.74442487044015	IV	14325236	14325256	+	21ur-3731	frm-9;grd-9;let-767;npp-8;sel-10;srx-88;srx-90;C06B8.7;F13B12.3;cutl-18;miz-1;T24B8.4;aakb-2;dbt-1;C14C6.2;C23G10.10;nhr-173;F16H11.1;F54H5.5;clec-125;Y48G1BM.6
21ur-10654	4.78415	2.13081	0.00684541	1	65537674349681456 ± 22818853613708888	IV	15996639	15996659	+	21ur-10654	amt-2;dnj-20;ins-19;rpl-28;C40A11.6;nhr-171;ZK938.11
21ur-4119	4.57921	2.02721	0.00786453	1	56758567080716352 ± 4280817458544205	IV	15707726	15707746	-	21ur-4119	bli-4;rab-30;srw-53;vab-10;C47E12.13;acp-2;K10D3.6;fbxa-135;ZK829.9;dop-6;glb-9;oac-10;maco-1;F26F4.9;F37F2.2;prp-17;K06H6.4;irld-48;T22D1.1;zeel-1
21ur-13460	-1.51583	3.14972	0.00789134	1	0.325928461570544 ± 0.0308157946112152	IV	16040321	16040341	+	21ur-13460	dyn-1;lin-49;mua-3;pqn-32;F44D12.2;R03G8.4;T16G1.3;ZK524.4;C37C3.7;F40A3.3;C14A11.9
21ur-6619	-1.51587	3.14972	0.00791321	1	0.325928461570544 ± 0.0308157946112152	IV	16040328	16040348	+	21ur-6619	aat-1;his-2;his-6;his-9;his-13;his-17;his-25;his-27;his-40;his-42;his-49;his-63;his-73;mtm-1;sel-2;ssp-19;clec-48;R07E5.1;F47B7.3;T19D12.4
21ur-2580	2.13631	2.95802	0.00794942	1	5.55055849277509 ± 1.64648198077022	IV	5195759	5195779	+	21ur-2580	dpy-27;gab-1;pqn-83;sir-2.3;snf-1;sre-2;twk-37;ulp-5;chil-3;pals-7;fbxa-174;amph-1;fbxa-102;R09H10.5;trcs-2;abcf-2;lgc-7;srbc-7;fbxb-88;ubr-4;F10C5.2;nuo-4;T19D7.6;ZC239.15
21ur-2989	1.1668	4.72137	0.00795921	1	2.31682964174314 ± 0.303579550998467	IV	16256826	16256846	+	21ur-2989	che-14;dyf-2;D1046.2;R01H10.7;W07A12.4;B0041.8;srt-69;C15C7.6;F22F7.2;T08G2.2;T23G11.11
21ur-12473	1.16683	4.72137	0.00797908	1	2.31682964174314 ± 0.303579550998467	IV	16256829	16256849	+	21ur-12473	ran-2;drsh-1;srh-308;K08C7.4;F22F7.2;H20E11.1;frpr-13;T24E12.10
21ur-7948	2.88267	2.4679	0.00838988	1	11.8229739238982 ± 5.535401391237	IV	6137182	6137202	-	21ur-7948	C37A5.7;C48D5.3;T26C5.4;ZK430.5
21ur-626	1.1537	5.00557	0.00862299	1	2.22455356099091 ± 0.337463002160899	IV	14303123	14303143	-	21ur-626	csp-1;dhs-25;lev-9;lin-36;nfi-1;parp-2;srh-235;srx-112;C12D8.13;C49F5.7;C54G4.2;F45D3.2;T06G6.6;Y111B2A.3;gad-3;C02F12.8;C49H3.4;F39G3.3;R05G6.10;R10F2.5;Y48G1BL.7;ZK993.2;B0273.115
21ur-12179	1.1537	5.00557	0.00863645	1	2.22455356099091 ± 0.337463002160899	IV	14303126	14303146	-	21ur-12179	acr-18;snt-2;srx-42;srx-112;cgef-1;tlp-1;D1043.1;fbxa-144;F55A11.8;E02C12.8;M6.4;R05G6.10;sqst-2;ZC196.2;bah-1
21ur-1682	2.98813	2.53979	0.00892976	1	12.679193904971 ± 2.83665365790755	IV	15613706	15613726	-	21ur-1682	cyk-3;srh-24;mltn-13;mps-2;K01A2.9;T24C4.3;K01A2.12;sgn-1;T24B1.1;Y66D12A.9
21ur-4867	1.89168	3.26151	0.00908938	1	4.88526348976492 ± 1.26255833764896	IV	16448403	16448423	-	21ur-4867	che-11;ego-2;gly-3;gon-2;klp-12;lrp-1;ocr-1;snf-6;T08G11.1;Y37A1B.4;prp-6;ZC84.1;spv-1;acer-1;F44A2.3;H01M10.2;sgca-1;T10E10.4
21ur-2600	3.27368	2.71421	0.00954803	1	15.5367606288812 ± 7.18812121638193	IV	16077231	16077251	-	21ur-2600	rac-2;sym-1;srsx-19;tag-243
21ur-12697	1.31425	4.30188	0.00958228	1	2.46465019902098 ± 0.272352936038141	IV	15122727	15122747	-	21ur-12697	unc-89;B0462.4;C27C12.3;C56A3.5;H21P03.2;miz-1;T09B9.5;dct-16;ztf-22;C01B10.3;C18H2.1;C50F7.5;F07C3.3;attf-5;T14B4.1;flp-28
21ur-1412	1.31424	4.30188	0.00960047	1	2.46465019902098 ± 0.272352936038141	IV	15122730	15122750	-	21ur-1412	adt-2;alh-4;apd-3;apb-3;atf-2;bar-1;ceh-44;chd-3;clp-3;col-142;col-150;cyk-3;cyn-15;dnj-12;dop-2;dpy-27;egl-45;eif-3.G;evl-14;fli-1;gei-14;hcp-6;hlh-14;hpr-9;ida-1;ina-1;lam-1;let-716;lin-3;lin-59;mdt-6;mel-11;mut-16;nas-6;nca-2;odr-4;pqn-15;swsn-4;ptr-6;ran-2;rbd-1;rde-1;ref-1;ret-1;sax-3;srh-203;sri-74;sup-17;taf-8;tag-4;itsn-1;lim-9;nlg-1;ttn-1;tag-131;tag-153;unc-84;vab-8;xnp-1;zyg-1;utp-20;B…
21ur-8289	4.5729	2.0194	0.00965223	1	55601308767389072 ± 15993363257615202	IV	6045058	6045078	-	21ur-8289	alh-9;div-1;gst-24;lrp-1;odr-2;sax-7;sma-1;sqt-2;vab-10;C10C5.2;ttll-12;set-8;fbxb-115;W02B12.12;dhc-4;mct-6;pde-5;pks-1;F10D7.3;nuo-4;fah-1;R155.4;T05A8.1;T11F8.4;ZC190.8;C06C3.10;ZK1053.7
21ur-3990	-1.06716	4.42579	0.0096668	1	0.468505253198451 ± 0.0608957826383621	IV	15877516	15877536	-	21ur-3990	gcy-25;F28B1.2;F54D12.8
21ur-1941	3.12422	2.61909	0.00967125	1	14.01232359831 ± 5.25312124636237	IV	15628695	15628715	-	21ur-1941	cdh-5;eftu-2;lin-25;gana-1;T19D2.1;abt-1;sem-4;srd-44;ocrl-1;Y73F8A.5;kcnl-3;F58A6.2;R12E2.8;arx-4;nhr-238;C45G9.15;C41G7.9
21ur-9603	-1.06717	4.42579	0.00967304	1	0.468505253198451 ± 0.0608957826383621	IV	15877516	15877536	+	21ur-9603	snfc-5;F13A2.1;afd-1;Y18H1A.2
21ur-7506	2.33258	3.07505	0.00978366	1	6.36982385915418 ± 3.00908660153393	IV	16810981	16811001	-	21ur-7506	abt-5;cdh-3;ced-1;clh-6;col-97;csn-4;dhs-22;dsc-1;egl-10;gap-1;gst-3;sid-3;let-2;let-418;mif-1;mrp-2;mut-14;nac-3;nas-5;pgp-9;ketn-1;ptd-2;snf-12;sra-27;srw-100;srw-123;sur-2;ttn-1;svh-1;tln-1;C05C10.3;pptr-2;C14A4.8;gale-1;C51E3.9;cyp-35D1;F19H6.6;F21D9.4;F25H9.6;F32H2.8;bcs-1;F54F7.2;png-1;math-33;M01E5.3;trpa-2;cdt-2;T05H10.1;acbp-5;bgal-1;Y6E2A.4;Y32B12C.3;Y37D8A.2;ani-3;strd-1;Y73F4A.3;Y75B8…

## Sheet: comparison 4
piRNA	logFC	logCPM	PValue	FDR	fc_sem_basedOnpseudo.counts	chr	startPos	endPos	strand	ID	Targets	Clash Supported Targets
21ur-12605	-2.90552	3.42987	1.91476e-05	0.209991	0.104731490187186 ± 0.0952818206709073	IV	5019469	5019489	+	21ur-12605	dcp-66;srw-115;srw-124;tps-2;unc-68;D1081.7;gpdh-1;pot-2;nduo-3;sulp-7;Y53H1C.3;Y54E5A.7;nrps-1;Y87G2A.16;soap-1;ddr-1;vha-16;F07E5.8;F13C5.2;cee-1;F28A10.5;K09E2.1;clec-175;W03F9.9;clec-123;ttc-37;Y54E10A.11;npr-5;ZK381.8;R05C11.4
21ur-6173	2.83118	3.25822	6.37308e-05	0.274554	6.60679128812811 ± 0.594611243831882	IV	16704283	16704303	-	21ur-6173	NA	NA
21ur-5217	1.56804	5.70972	7.51036e-05	0.274554	3.06170238862977 ± 0.441980567911127	IV	15763871	15763891	-	21ur-5217	puf-3;C47E12.11;C56A3.6;C52B9.4;Y47G6A.26;puf-11;C15H11.13
21ur-1427	-3.21253	2.99858	0.000179298	0.291065	0.0963733409539456 ± 0.0498588217309601	IV	5033690	5033710	+	21ur-1427	atp-3;pop-1;srw-107;smgl-1;R05H10.7;R10H10.3;Y43D4A.6;nhr-238
21ur-13860	-3.21252	2.99858	0.000179401	0.291065	0.0963733409539456 ± 0.0498588217309601	IV	5033691	5033711	-	21ur-13860	ergo-1
21ur-4918	1.30645	9.34774	0.000187674	0.291065	2.47209913028282 ± 0.437601124823703	IV	15764649	15764669	-	21ur-4918	Y22D7AR.2;cex-1;Y60A3A.25
21ur-6714	1.29547	6.80499	0.000215679	0.291065	2.45251982504003 ± 0.198708488756622	IV	14669529	14669549	+	21ur-6714	ced-5;C08G9.2;F48E8.4;K11D12.12;egg-2;Y97E10B.1
21ur-6752	1.37486	7.1342	0.000238821	0.291065	2.59598012553939 ± 0.539971298162182	IV	15191402	15191422	-	21ur-6752	emr-1;let-504;C04H5.1;C42D4.13;K09H9.7;W09G12.9
21ur-14327	1.37486	7.1342	0.00023886	0.291065	2.59598012553939 ± 0.539971298162182	IV	15191403	15191423	-	21ur-14327	emr-1;frm-1;let-504;C04H5.1;ing-3;C42D4.13;pud-3;F30H5.3;K09H9.7;ZK688.10
21ur-15588	1.31163	5.84511	0.000351086	0.385036	2.53601081702795 ± 0.257332326601975	IV	2388245	2388265	+	21ur-15588	bar-1;mca-3;str-135;C47E12.12;usp-48;pole-1;chd-1;sipa-1;Y46G5A.8;C29H12.2;F18E9.3;F44A2.3;wdr-12;Y38F2AR.9
21ur-1362	1.20357	7.60834	0.000830936	0.66882	2.29707090382359 ± 0.265385427842959	IV	14183831	14183851	+	21ur-1362	ceh-20;ptc-3;src-1;unc-89;wdfy-3;ipla-2;bath-4;mfsd-6;nhr-222;Y39A3CL.7
21ur-11117	-2.36927	3.11247	0.000842954	0.66882	0.177192842005311 ± 0.00765409014662051	IV	16535689	16535709	-	21ur-11117	rme-8;unc-26;F07C6.2;srz-103;eif-2D
21ur-11154	1.26889	6.08844	0.0008534	0.66882	2.41304893463274 ± 0.25801451752471	IV	13691047	13691067	+	21ur-11154	clec-182;Y42H9B.3
21ur-1753	1.26889	6.08844	0.000853787	0.66882	2.41304893463274 ± 0.25801451752471	IV	13691044	13691064	+	21ur-1753	col-63;col-153;dpy-7;fkh-8;klp-12;let-765;mrp-7;mup-4;nhr-54;pld-1;mdt-30;rig-3;sma-6;taf-5;tnt-2;wrm-1;mdt-17;C04F12.1;cyp-36A1;kcnl-2;F20G2.2;copb-2;srpa-68;K01A11.2;R10E8.6;pges-2;nhr-271;ekl-6;Y6E2A.7;pnc-2;tag-349;sql-1;Y116A8C.11;nhr-229;C01F1.6;C02F5.12;C15B12.4;cyp-33C9;fbxb-35;fbxb-36;F10G7.9;F45F2.10;cpd-1;F59E12.9;T12E12.1;zeel-1;Y73E7A.8;K06B4.15;K10D2.8;F01E11.17;Y41C4A.32;gcy-9;lad-…
21ur-6979	1.77495	3.99376	0.00094412	0.690278	3.62096636226714 ± 0.864544842863359	IV	17160767	17160787	-	21ur-6979	dyc-1;ggr-3;osm-6;srw-69;acd-3;R08A2.5;fbxb-59;C50D2.9;maoc-1;frpr-6;mfsd-6;F07E5.5;otub-2;pde-6;ZK1055.2;F57C12.6
21ur-12417	1.42697	5.28885	0.0010935	0.705619	2.71027526739311 ± 0.58070805988144	IV	5053078	5053098	+	21ur-12417	W02B12.12;F31F7.1
21ur-3753	1.42697	5.28885	0.00109378	0.705619	2.71027526739311 ± 0.58070805988144	IV	5053075	5053095	+	21ur-3753	acy-1;atl-1;cyp-13A7;chs-2;cpi-1;col-167;dnj-8;fkb-7;hum-7;ida-1;inx-1;kin-15;kup-1;lim-4;lpd-3;mog-5;nas-16;dcap-2;nhr-43;nhr-115;nlr-1;nmy-2;npp-6;pan-1;plc-1;ptrn-1;pqn-41;prp-21;swsn-1;ptr-13;ptr-23;rde-1;rol-3;rrf-2;sma-9;srh-7;srh-118;srh-120;sru-11;sru-36;srw-85;srx-129;sym-1;trt-1;twk-13;unc-31;unc-82;xtr-2;B0198.2;C01G6.5;lmtr-3;set-3;C09G1.2;C11H1.5;C13C4.6;C14C10.2;C14C10.5;nrx-1;C34F6…
21ur-6818	1.08504	7.44375	0.00127138	0.774625	2.11696345590421 ± 0.139503469800585	IV	13908129	13908149	+	21ur-6818	dhs-17;H24K24.2;T01H10.11;Y55F3AM.14	Y55F3AM.14
21ur-3970	1.05942	8.96418	0.00137337	0.778594	2.08395650344917 ± 0.212737947887232	IV	15496142	15496162	+	21ur-3970	pck-3;fbxa-143
21ur-2174	1.32878	5.17934	0.00141988	0.778594	2.51480444234699 ± 0.356428899104028	IV	5832009	5832029	-	21ur-2174	F34D10.6
21ur-839	-1.32138	5.22606	0.00188343	0.909666	0.402029791343045 ± 0.0619643843152609	IV	15845457	15845477	-	21ur-839	srg-28;sars-2;taf-1;ttn-1;ubc-8;D2030.11;F19B2.5;F55A11.4;T05D4.5;ztf-22;sfa-1;rha-2;C24H12.4;F09E5.11;clec-180;F53G12.8;dop-3;Y57G7A.5;syx-16;Y41E3.18;acy-1;cbp-1;cyn-16;msh-6;pat-3;pyc-1;mrck-1;C06B8.2;C07A9.5;C17D12.3;ehbp-1;F33H1.4;K07F5.14;R07B7.10;T04F3.1;T13H5.8;Y47H9A.1;sinh-1;B0496.6;C28C12.12;C42C1.13;C50D2.6;E02C12.6;F37A4.4;F46C8.1;R02F11.4;set-15;T01B10.5;Y34B4A.8;josd-1;F59A6.12
21ur-9049	2.10556	2.73627	0.00199295	0.909666	5.48031133546897 ± 1.07429820545497	IV	14192970	14192990	+	21ur-9049	ced-5;chp-1;col-63;col-79;col-99;ctn-1;dys-1;egl-8;ego-2;F35A5.8;fli-1;fars-3;glr-1;him-1;hum-4;hum-7;isw-1;kin-18;lrk-1;nmy-2;nud-1;pms-2;ptr-23;rfc-1;rig-1;spc-1;srw-87;srx-36;srx-92;taf-3;ttn-1;mrck-1;unc-22;unc-41;B0001.2;sucl-1;C06C3.7;C14B1.2;C28D4.4;C28D4.5;F02C12.1;eif-2Bdelta;lex-1;mig-32;F22B5.10;F25H5.2;F46C5.10;F53C11.4;F54B3.1;F54D1.6;png-1;chd-1;H12D21.10;K01D12.10;mam-3;K11B4.1;R03…
21ur-9240	3.99959	2.3511	0.00213408	0.909666	23.3627450874319 ± 15.420999194199	IV	14339836	14339856	+	21ur-9240	abt-2;aha-1;amt-4;avr-15;clh-3;daf-15;dnj-16;evl-14;xnd-1;gst-15;his-12;his-16;his-43;his-68;hlh-26;let-418;mix-1;nas-39;nxf-2;pcp-4;pop-1;sin-3;pqn-92;swsn-4;rme-1;sea-2;jmjd-1.1;srw-34;swp-1;unc-22;tln-1;vha-7;B0024.3;gspd-1;C01G12.3;C05C10.2;C05D12.4;pptr-2;C16C2.4;rad-26;xpf-1;phf-34;F23B12.7;F23H12.3;aptf-3;cfp-1;F54C9.9;dgat-2;golg-4;M162.7;arrd-11;T01H3.5;sdz-30;chaf-1;rmh-2;T13H5.1;samp-1…
21ur-1175	1.19692	5.20683	0.0022998	0.909666	2.34649997289559 ± 0.307676130030111	IV	14026879	14026899	+	21ur-1175	bpl-1;cya-2;dpf-7;dpy-22;dsl-6;efn-2;ears-2;gcy-8;acdh-13;hus-1;mtk-1;nfm-1;rsp-4;soc-2;srh-279;vps-16;tnt-4;twk-8;vhp-1;ugt-22;folr-1;set-5;nhr-165;F10D11.3;ehbp-1;F26A3.1;F38A1.8;F57C2.5;M03C11.8;ikke-1;Y51B9A.5;tag-273;ZC116.3;ZC247.2;C04E7.3;C23F12.3;C27A12.6;cnnm-3;maph-9;C46C11.2;F08F1.9;lgc-38;F14H12.2;F19B10.10;F25B4.5;F27D9.7;F32B5.2;epg-4;nhr-182;cla-1;nprl-2;fbxa-41;nhr-195;H06I04.3;H2…	C39E9.12;pygl-1
21ur-15039	1.19692	5.20683	0.00230016	0.909666	2.34649997289559 ± 0.307676130030111	IV	14026882	14026902	+	21ur-15039	dpf-3;hsr-9;kin-18;C16C10.8;F14F7.4;T05F1.11;bcl-11;F14B8.6;Y87G2A.25
21ur-6426	1.06272	7.47325	0.00250447	0.909666	2.08246107555625 ± 0.142106509496316	IV	14659743	14659763	-	21ur-6426	klp-7;lea-1;msh-2;sra-10;srw-29;unc-64;ver-1;tofu-1;C49C3.4;T27F6.6	lea-1
21ur-2150	-4.78111	2.09251	0.00276967	0.909666	4.51846399694736e-18 ± 0	IV	15680096	15680116	+	21ur-2150	cept-1;Y70G10A.3;F46C8.3;nhr-186;K07E3.9;srh-72;tab-1;anp-1;nhr-288;ZK1053.6;vps-22;K08D9.4
21ur-3333	1.09131	8.06298	0.00281417	0.909666	2.13144799372008 ± 0.38888932002487	IV	14421688	14421708	+	21ur-3333	col-182
21ur-13366	1.09131	8.06298	0.00281625	0.909666	2.13144799372008 ± 0.38888932002487	IV	14421689	14421709	+	21ur-13366	NA	NA
21ur-6071	-2.06299	2.90069	0.00283145	0.909666	0.203709643124094 ± 0.10459424653423	IV	17189847	17189867	-	21ur-6071	ceh-44;dys-1;gap-2;gly-14;mec-1;mars-1;srj-45;tig-2;unc-11;cyp-29A4;C15A11.4;rrbs-1;rnf-121;C39B10.1;lact-7;mec-19;D2045.8;clec-42;mfap-1;lgc-44;rpn-6.2;K02B7.3;K08H2.3;vglu-2;M03C11.8;M04C9.4;ctc-3;ctc-1;mrps-12;vps-53;T18D3.1;Y41C4A.9;Y51A2D.7;daf-38;irld-20;ZK512.2;ZK899.6;C06E4.3;C08A9.3;eif-2D;D1005.2;otpl-2;F08C6.5;F09F7.5;F27C1.2;F41C3.4;F54A3.2;spe-49;calu-1;M04G7.3;T22E5.1;W09C3.4;W10C8.…
21ur-10503	-1.98685	3.26333	0.00285311	0.909666	0.225946720197006 ± 0.106424692852869	IV	14122847	14122867	-	21ur-10503	ace-3;alh-1;atf-6;crh-1;dgk-1;lem-2;lin-45;mec-9;mix-1;pes-9;pqn-89;swsn-1;ref-2;srw-9;wwp-1;C17D12.7;F53F8.5;F53H2.3;M04B2.2;T24B8.7;T28F4.5;pamn-1;trpl-2;cdap-2;Y51H7C.5;Y54G2A.11
21ur-7175	-1.98689	3.26333	0.00285719	0.909666	0.225946720197006 ± 0.106424692852869	IV	14122846	14122866	-	21ur-7175	ace-3;aha-1;alh-1;atf-6;ced-1;dgk-1;ham-1;lin-45;mix-1;mpz-1;pes-9;swsn-1;ser-1;srw-9;unc-62;wwp-1;lcmt-1;clec-230;F53F8.5;F53H2.3;egas-3;Y73F8A.5;F19C7.8;F31A3.3;prp-17;plpp-1.1;F54G2.1;T03G6.3;T04A6.1;T28F2.2;Y51H7C.5;ZC196.4
21ur-434	-1.09181	7.23329	0.00286205	0.909666	0.467895223002706 ± 0.0889437809136694	IV	15384654	15384674	-	21ur-434	K10G9.2;cht-3;acr-23;dnj-12;mec-4;mdt-17;D1081.6;F26F2.1;fdps-1;glb-29;gad-3;F15E6.6;che-10;thoc-1;T20B12.3;T27A10.6;fbxa-66	dnj-12
21ur-13500	1.67314	3.81491	0.00299351	0.909666	3.37015331502958 ± 0.8441371466453	IV	15363375	15363395	+	21ur-13500	acr-11;ncs-3;str-39;str-44;C10C6.7;cyp-31A2;dcn-1;T07C4.3;nep-23;lam-2
21ur-1348	1.67318	3.81491	0.00299885	0.909666	3.37015331502958 ± 0.8441371466453	IV	15363378	15363398	+	21ur-1348	srh-88;R10E8.1
21ur-3654	2.02327	3.06355	0.0031734	0.909666	4.91962892969593 ± 1.4135658715049	IV	17049123	17049143	-	21ur-3654	wrn-1;oac-27;syp-4
21ur-10423	-2.44655	2.8848	0.00327044	0.909666	0.172562715873393 ± 0.109788337923996	IV	13989630	13989650	+	21ur-10423	itx-1;crn-7;C03F11.2;fbxb-36
21ur-1342	-2.44653	2.8848	0.00327396	0.909666	0.172562715873393 ± 0.109788337923996	IV	13989627	13989647	+	21ur-1342	fkb-6;imb-3;nhr-120;pept-2;osm-12;tra-2;best-13;F40F12.7;T01H3.3;ZK1037.6;C01G8.1;hpo-12;ltah-1.1;F19C7.5;F28C10.3;acs-4;F49E8.7;K12H4.5;gei-8;nhr-116;sams-5;unc-52;C13B4.1;C14B4.2;F46C5.9;F57A8.4;best-25;Y52B11A.11;C50C3.2;sre-51;Y58A7A.3;Y58A7A.4	C13B4.1
21ur-15361	2.01156	3.14953	0.0033141	0.909666	4.05785121499124 ± 0.700109659720963	IV	15063784	15063804	+	21ur-15361	NA	NA
21ur-1436	2.01157	3.14953	0.00331783	0.909666	4.05785121499124 ± 0.700109659720963	IV	15063780	15063800	+	21ur-1436	mop-25.1
21ur-7555	-2.72361	3.06881	0.00396071	0.942013	0.139411060843531 ± 0.0651630988505662	IV	4835460	4835480	-	21ur-7555	amx-1;clc-1;col-68;gcy-35;gro-1;let-363;let-607;lrp-2;mig-5;mua-3;nas-23;npp-10;odr-1;tank-1;rab-14;sfxn-1.1;B0024.15;chil-3;C36B1.11;C54G4.2;F13E9.11;drsh-1;F47H4.2;dot-1.4;K02C4.3;nhr-198;K08E4.6;R09E10.5;T27F6.7;T28C6.7;nmy-3;Y73F8A.13;Y75B8A.3;soem-1;tftc-3;B0416.5;B0563.7;glb-6;elf-1;zgpa-1;C55B7.11;aipr-1;F07E5.5;F07E5.7;F07E5.8;cutl-5;F53B1.8;myo-5;cutl-16;R05H11.1;ztf-16;mks-1;T05C3.2;let…
21ur-12479	3.1491	1.98099	0.00421103	0.942013	15.6622073465048 ± 2.85893446278051	IV	14625651	14625671	+	21ur-12479	pqn-24;tsp-2;F31C3.3;sdz-31;chil-26;srbc-60
21ur-2334	3.14912	1.98099	0.00421221	0.942013	15.6622073465048 ± 2.85893446278051	IV	14625654	14625674	+	21ur-2334	dgk-4;tbcd-1;fozi-1;madf-10;arrd-5;F09C12.6;K09F6.10;abts-4
21ur-12750	-4.83459	2.11252	0.00428886	0.942013	4.19356617203862e-18 ± 0	IV	14953897	14953917	+	21ur-12750	C46A5.4
21ur-12654	-4.83466	2.11252	0.00429315	0.942013	4.19356617203862e-18 ± 0	IV	14953896	14953916	+	21ur-12654	gcy-1;gcy-2;glp-1;nhr-108;Y7A9A.1;pitr-2;C46A5.4;C17G10.13
21ur-1643	1.09724	4.96856	0.00439478	0.942013	2.18908479800017 ± 0.156940347050336	IV	15967146	15967166	-	21ur-1643	ymel-1;egl-4;gld-2;hum-1;sax-3;srg-23;srg-24;C44B9.2;K07F5.16;pitp-1;Y70G10A.3;exoc-8;ZC116.3;ZK524.4;sco-1;ddo-3;F28B3.5;swip-10;nlf-1;pho-14
21ur-12921	1.09726	4.96856	0.00440947	0.942013	2.18908479800017 ± 0.156940347050336	IV	15967147	15967167	-	21ur-12921	hst-1;hum-1;rad-54;sph-1;srg-23;srg-24;sru-26;str-61;str-261;rnf-121;C44B9.2;M03C11.3;R11H6.4;rsy-1;ZC116.3;sco-1;Y40C5A.3;ZC190.6
21ur-4893	-1.11195	6.18867	0.00451199	0.942013	0.456326186727638 ± 0.102252548809056	IV	15332425	15332445	-	21ur-4893	NA	NA
21ur-9482	1.17087	6.97697	0.00453431	0.942013	2.26321349014834 ± 0.452119201289888	IV	14459431	14459451	-	21ur-9482	tofu-5
21ur-14972	1.17088	6.97697	0.00453559	0.942013	2.26321349014834 ± 0.452119201289888	IV	14459427	14459447	-	21ur-14972	rilp-1;T04G9.6;Y32H12A.8
21ur-1499	-2.66186	2.99835	0.00455245	0.942013	0.127531983179858 ± 0.115647791838476	IV	16793212	16793232	-	21ur-1499	haf-9;nsy-1;xbx-1;srz-16;mrpl-36;Y54E2A.9;Y105C5B.11;smcr-8;Y46E12BL.2;cdk-8;ceh-18;col-158;cup-5;eif-3.D;gcy-6;gly-20;hse-5;let-23;mog-3;paf-2;ptp-2;rfs-1;sax-2;sdc-2;syd-2;taf-1;srgp-1;AC8.3;B0334.13;C17E4.1;C31G12.4;ehbp-1;F28H7.3;F33C8.4;F42G4.2;fbxa-185;fbxa-189;noah-2;gkow-1;glb-24;Y47D3A.13;Y62E10A.19;Y106G6A.1;ZK896.5;cpna-2;pot-1;soap-1;fln-2;C27A12.6;C27A12.7;tppp-1;C34H4.5;C53C9.2;F26A…
21ur-6318	-1.34686	4.70676	0.00502036	0.952695	0.382855164063367 ± 0.0874936535621017	IV	13998026	13998046	-	21ur-6318	inx-1;nmr-1;tag-51;Y49E10.21;Y53F4B.13;shk-1;R02C2.7;ttr-42
21ur-6816	1.47077	5.23863	0.00503024	0.952695	2.7938789255348 ± 1.07571873621053	IV	5425479	5425499	+	21ur-6816	cmk-1;ctn-1;mars-1;rbr-2;rnf-5;sng-1;sru-35;F35G12.7;mnk-1;pde-1;acs-1;T05A8.5;tpxl-1
21ur-15137	-1.34689	4.70676	0.00503032	0.952695	0.382855164063367 ± 0.0874936535621017	IV	13998025	13998045	-	21ur-15137	gop-1;nmr-1;sri-24;chil-6;chil-9;shk-1;mig-39;pck-1;ttr-42
21ur-13542	1.03774	6.29148	0.0054032	0.952695	2.04840099921172 ± 0.301902831192764	IV	15360132	15360152	-	21ur-13542	kqt-1;slo-1;slo-2;srj-25;heh-1;R10E11.6;T05B9.1;mlc-5;jun-1;jmjd-3.1;T25D10.1;Y110A7A.9
21ur-3885	1.03774	6.29148	0.00541623	0.952695	2.04840099921172 ± 0.301902831192764	IV	15360129	15360149	-	21ur-3885	acr-7;emo-1;feh-1;fkb-7;hsp-1;pgp-12;rrf-2;F49C12.7;ZK1321.4;C02F5.3;fbxa-164;bath-31;fbxa-54;T19C3.5;fbxa-13;Y73C8C.10;cin-4
21ur-85	1.60101	3.51065	0.00549292	0.952695	3.46426711994585 ± 0.708137215175879	IV	13678164	13678184	-	21ur-85	ran-2;srg-59;C27C7.7;F56A8.4;gss-1;C28H8.5;spt-16;cnx-1;ins-31;sax-2;srw-55;syg-2;F36A2.9;tcc-1;F12E12.1;F35D11.3;nprl-2;R05D3.12;ZK105.1
21ur-8188	-1.28474	5.32073	0.00559759	0.952695	0.398570008944442 ± 0.173603910571696	IV	4875304	4875324	-	21ur-8188	acr-6;hap-1;nhr-2;nos-3;svh-5;tsn-1;aptf-4;T13H5.1;F58F9.4;T12E12.3
21ur-5319	-1.50715	3.82513	0.00572456	0.952695	0.335290595752455 ± 0.0549012500311649	IV	14415504	14415524	-	21ur-5319	fars-3;srh-269;unc-89;fbxa-144;K08C7.7;K10D6.4;M03B6.5;Y42A5A.1;K06A5.1;natc-1;M199.9;cpi-2;efl-2;gar-1;irk-2;nas-13;nhr-130;pes-4;rcq-5;rde-2;sec-24.2;srg-15;srh-184;sri-27;str-182;unc-76;ugt-2;B0198.2;C06A1.2;C18B12.6;K02D3.2;K07A12.4;ymel-1;sre-4;T13H5.1;srz-91;crp-1;Y81G3A.4;puf-12;B0563.6;C18H9.5;cnnm-3;sre-49;F07F6.4;F41D9.2;F46H5.7;F53H1.1;vps-18;mgl-3;abtm-1;syd-9;lsy-12;Y69H2.17
21ur-5151	1.21951	6.73327	0.00574803	0.952695	2.3459650147355 ± 0.732509623734766	IV	17074978	17074998	-	21ur-5151	NA	NA
21ur-3483	-1.32877	5.30734	0.0057824	0.952695	0.38949838928121 ± 0.164836091947827	IV	16581998	16582018	-	21ur-3483	fkh-3;fli-1;gfi-1;AC3.5;glna-2;F33H1.4;F44E5.4;F44E5.5;T08A11.1;slc-17.4;sre-47;gcn-2;B0511.12;C06G3.8;C28H8.7;C35E7.6;lst-6;E02D9.1;fbxb-6;F25E5.1;F35H12.6;F57F4.4
21ur-2638	-1.29973	4.64341	0.00590423	0.952695	0.38814139946557 ± 0.155439114666864	IV	13956565	13956585	-	21ur-2638	lgx-1;mig-2;mtm-5;nhr-19;nhr-21;sri-29;ten-1;unc-34;spin-2;clec-227;pfas-1;aman-2;H01G02.1;R107.5;Y44A6C.2;F08F8.10;cpsf-2;clec-1;F26G1.1;F36H9.5;F56F4.4;ctsa-1;T03D3.5;lgc-54;T22F7.3;W06E11.1;W08F4.12;Y54G2A.12	aman-2;Y54G2A.12
21ur-5030	-1.36041	4.74267	0.00590711	0.952695	0.380500445628276 ± 0.14423778736653	IV	15228810	15228830	-	21ur-5030	dpy-11;frm-9;plc-3;ptr-23;rpl-24.2;madd-3;F54E4.2;chil-18;mrpl-16;T28A8.5;set-25;ZK1098.1;C33C12.10;C46A5.6;D1007.8;pccb-1;F53E10.6;Y24D9A.6;Y48A5A.1;icd-2;ZK652.8;nep-25;F32H2.11
21ur-11722	1.23598	5.23832	0.00636679	0.959529	2.32572722756076 ± 0.361860074548295	IV	6602669	6602689	-	21ur-11722	pgp-10
21ur-4992	-1.33464	4.53776	0.00641424	0.959529	0.38337655626212 ± 0.158803431202339	IV	15989190	15989210	+	21ur-4992	gly-4;lys-3;rpn-1;hrg-4;kmo-2;R10H10.3;F22F4.1;agr-1;Y71H2AM.1;nhr-41
21ur-2511	1.07146	5.48624	0.0065507	0.959529	2.12537531313845 ± 0.34273611647526	IV	6181237	6181257	-	21ur-2511	gta-1;nhx-8;ocr-1;mdt-30;F28H6.6;fbxb-8;F28C10.3;egg-5;R119.5;egg-4;cdh-12;Y41E3.18
21ur-5065	1.49652	4.29644	0.00686829	0.959529	2.81008340125353 ± 0.731139080537095	IV	17199377	17199397	+	21ur-5065	sex-1;algn-13
21ur-2604	1.02397	5.66115	0.00720093	0.959529	2.00214977445111 ± 0.0535053141031593	IV	13635208	13635228	-	21ur-2604	eea-1;Y57G11B.3;F25B5.5;Y48G1BR.1
21ur-8512	3.27711	2.00006	0.00722935	0.959529	16.9066565702148 ± 7.1137533625724	IV	12242075	12242095	-	21ur-8512	cpf-1;fut-8;nhr-88;nhr-95;pat-2;sqv-8;srd-16;str-44;taf-2;C23H4.3;oac-7;sre-21;F35C5.3;F36F2.7;srt-48;Y51H4A.25;C09E8.1;C30F12.5;srab-7;F41G3.10;F48C1.8;F53H1.1;F55D1.1;H09G03.1;T08B6.1;Y43H11AL.1;vha-19;Y82E9BR.16;nhr-41
21ur-13912	-1.5361	3.52078	0.00724429	0.959529	0.317167241181774 ± 0.112339988061644	IV	16116495	16116515	-	21ur-13912	col-87;coq-8;dpf-7;dsl-5;gst-33;hmr-1;let-607;let-756;nfm-1;pgp-14;phf-5;pmr-1;rpl-11.1;sma-3;tba-1;try-6;unc-11;C32C4.1;C32C4.3;C44B9.3;timm-23;degt-1;nurf-1;F35C11.4;acbp-3;png-1;M03C11.6;M153.3;T22C1.5;cutl-4;pptr-1;nhr-230;Y43F8B.1;spe-38;eyg-1;Y102A5C.2;Y105C5B.1;B0432.7;nhr-152;sre-11;srbc-9;C18F10.9;C33E10.6;rpap-3;F37A4.1;M70.5;R09B5.11;smcr-8;T20B6.2;T26A8.1;W02D7.4;Y49F6C.2;Y54F10AM.8;Y…
21ur-12175	-1.53611	3.52078	0.00724729	0.959529	0.317167241181774 ± 0.112339988061644	IV	16116493	16116513	-	21ur-12175	cng-3;col-19;col-132;hsp-90;dcr-1;let-49;let-607;lin-29;ngp-1;pmr-1;pars-2;rab-8;srj-53;try-6;wnk-1;degt-1;F35C11.4;F42G4.2;F49E12.12;M04C3.2;T02C1.2;T25C12.3;W09D10.4;irld-56;Y43F8B.1;nova-1;Y105C5B.1;Y105C5B.8;Y111B2A.12;srt-12;EEED8.2;lmd-4;F10D7.5;nop-1;math-27;F53F10.2;F59A7.2;gnrr-5;H34C03.2;smcr-8;T07E3.4;T26A8.1;helq-1;mrpl-45;F20D6.12;Y48A5A.3;C46C11.4;ZK105.11
21ur-5954	-1.53615	3.52078	0.00725632	0.959529	0.317167241181774 ± 0.112339988061644	IV	16116490	16116510	-	21ur-5954	aat-4;acr-9;eps-8;fem-2;nhr-128;nhr-137;pkc-3;skr-8;srg-16;tsp-11;ulp-5;unc-36;tiar-3;C14A4.6;C33B4.5;C33D3.3;rtfo-1;K12G11.6;T13H10.2;W09D10.4;Y37H2A.1;Y43F4B.7;Y48C3A.18;parn-2;yars-1;ZK1067.4;B0546.4;C16C8.13;tbc-16;F54A3.5;R06B10.7;smcr-8;trpl-2;Y5H2B.1;nsy-4;Y39G10AL.1;Y67D2.7;Y92H12A.5;plst-1;ZK185.1;M02E1.3;srsx-15;tag-266
21ur-10335	-1.87487	3.58242	0.007651	0.959529	0.286295791456866 ± 0.140023700935471	IV	15865196	15865216	-	21ur-10335	gly-7;gpr-1;grl-17;nab-1;smc-3;snt-3;srg-31;str-236;twk-40;unc-115;AC3.5;lron-3;C14H10.2;C53D6.6;yif-1;glo-3;K02B12.2;T06C12.12;T16H12.3;ash-2;ippk-1;Y39B6A.29;lin-38;Y66D12A.21;ZK856.5;rha-2;dnc-4;bicd-1;srbc-16;sre-54;C56E6.2;ncam-1;F13A2.4;F18E3.10;F29B9.8;T22B11.4;Y69F12A.1;F59C6.14
21ur-14067	-1.87486	3.58242	0.0076536	0.959529	0.286295791456866 ± 0.140023700935471	IV	15865201	15865221	-	21ur-14067	alh-4;ceh-33;cux-7;dyc-1;ech-9;let-23;mpz-1;pfn-1;pqn-63;sid-2;srh-244;srv-29;srw-62;srw-130;srw-133;srx-60;unc-44;unc-69;clec-223;C54C8.4;nmat-2;F45B8.3;fbxa-188;F54B3.2;F54B11.11;K01D12.6;K04C1.5;trpa-2;zbp-1;R03G8.4;T04F8.2;W02A2.5;Y39A1A.18;Y47H9C.8;lgc-8;vps-51;sams-4;C18G1.6;C45G9.10;C50F7.9;nhr-173;D2092.6;F18E3.11;picc-1;F36D4.4;F39C12.1;F40A3.2;F41B4.2;irld-42;osg-1;T15B12.1;blos-4;Y45G5…
21ur-15224	1.10484	4.59556	0.00783129	0.959529	2.19972735603172 ± 0.21552099121928	IV	15347219	15347239	+	21ur-15224	NA	NA
21ur-5155	1.10484	4.59556	0.00783203	0.959529	2.19972735603172 ± 0.21552099121928	IV	15347222	15347242	+	21ur-5155	NA	NA
21ur-5442	-2.31251	2.80644	0.00797789	0.959529	0.205544735840178 ± 0.0365761058705347	IV	16283048	16283068	-	21ur-5442	dnj-29;dyf-6;egl-43;gop-3;mek-1;mrp-1;nhr-135;nrf-5;pqn-80;prx-1;srh-154;srh-236;srw-16;ttn-1;vit-2;swsn-9;lact-6;smcl-1;E03H4.8;F01D5.3;F31D4.2;copb-2;F47B10.5;abts-1;ric-7;K12D12.5;Y43F8B.3;acl-7;Y47H10A.3;dsbn-1;Y37H9A.5;C34F11.1;dnpp-1;acp-5;cdh-8;Y9C9A.16	dsbn-1
21ur-11491	-2.31245	2.80644	0.00798731	0.959529	0.205544735840178 ± 0.0365761058705347	IV	16283052	16283072	-	21ur-11491	dhs-8;fmo-1;gtl-1;ina-1;iars-1;srh-122;srx-10;F10A3.12;F23B12.7;F28D9.4;K05D4.9;K10H10.6;T12D8.9;comt-2;Y62H9A.5;cpsf-3;Y79H2A.3;Y80D3A.8;Y111B2A.10;ZK632.2;ZK945.4;C01F1.5;C18B10.6;bbs-9;F13C5.3;F49E10.2;W03B1.5;W03B1.9;irld-15;Y22D7AL.9;ZC53.4;ZK328.6;srz-104
21ur-3636	1.01119	6.25166	0.00804117	0.959529	2.03278804061382 ± 0.373568262936436	IV	13886176	13886196	+	21ur-3636	dhs-20;lin-9;F35B12.3;mrps-26;F13H8.6;F52H2.7;Y45G5AM.3;F41G3.18
21ur-11063	-1.0892	5.18095	0.0080922	0.959529	0.45531085807412 ± 0.110812041295909	IV	5600018	5600038	-	21ur-11063	C12D12.3;Y48G8AL.10
21ur-14029	2.02496	2.94946	0.00827196	0.959529	4.89560086119118 ± 1.59233739081615	IV	5388077	5388097	+	21ur-14029	clec-142;C46H11.2;mltn-6
21ur-3157	1.05084	5.82724	0.00850886	0.959529	2.1143474473844 ± 0.441657256261541	IV	14183190	14183210	-	21ur-3157	act-2;gcy-3;dpt-1;F35E12.10;nkb-3;btb-19;nrde-2;Y37H2A.10;F44E2.4
21ur-14541	1.05085	5.82724	0.00851367	0.959529	2.1143474473844 ± 0.441657256261541	IV	14183189	14183209	-	21ur-14541	cft-1;srd-31;tba-5;dpt-1;btb-19;C05D11.1;T02B11.3;ser-6
21ur-7161	1.05086	5.82724	0.00852336	0.959529	2.1143474473844 ± 0.441657256261541	IV	14183184	14183204	+	21ur-7161	cdh-7;sdc-3
21ur-11656	-4.64586	2.01499	0.00862206	0.959529	5.34318547651161e-18 ± 0	IV	5916627	5916647	+	21ur-11656	hum-10
21ur-8812	-2.6163	2.64013	0.00881445	0.959529	0.177917852845907 ± 0.0891280524520215	IV	6016086	6016106	+	21ur-8812	flp-4;kpc-1;rad-51;mrpl-54;ate-1;K10D11.6;scav-2;ZK643.7;C16A11.5;Y37E11AM.3;acs-6;btb-22
21ur-8903	4.63492	1.83386	0.00882293	0.959529	195870583794922304 ± 48112362579580248	IV	14863159	14863179	-	21ur-8903	dnj-8;gcy-1;gcy-2;twk-37;chil-1;chil-3;chil-4;chil-5;chil-6;chil-8;F26E4.7;skpo-1;ugt-55;ZK673.11;chil-9;B0416.7;ugt-51;T26A8.1;Y71H2AM.3
21ur-5459	-1.51948	3.81877	0.00918614	0.959529	0.327088677698625 ± 0.0998316827331981	IV	15789372	15789392	+	21ur-5459	str-33;sre-30;glct-3;Y20C6A.1;Y38E10A.8;F59E12.9;K12H6.2;Y59H11AR.4
21ur-1178	-1.71824	3.07579	0.00955019	0.959529	0.26803043087107 ± 0.160427612629467	IV	15882626	15882646	+	21ur-1178	pxn-1;mys-4;mspn-1;tmc-2;hecd-1;math-25;dhhc-11;ZC190.4;nhr-286
21ur-14169	-1.71824	3.07579	0.00955093	0.959529	0.26803043087107 ± 0.160427612629467	IV	15882625	15882645	+	21ur-14169	coq-2;tag-68;mspn-1;hphd-1;sld-5;fbxa-38;dhhc-11
21ur-12509	-1.07497	10.5798	0.00964584	0.959529	0.474654603311317 ± 0.107669333468743	IV	14647011	14647031	-	21ur-12509	eat-3;eif-3.E;let-92;srh-85;srw-41;str-118;F14D7.6;T27F6.8;C04E7.4;C05D10.4;H20J04.7;K12H6.12;srbc-67;Y71H2B.2;cpsf-1;T06E4.14;F17C8.9;C53A5.17
21ur-4411	-1.07497	10.5798	0.00965258	0.959529	0.474654603311317 ± 0.107669333468743	IV	14647014	14647034	-	21ur-4411	csq-1;grl-15;let-502;ptd-2;spp-18;srh-174;C06B8.3;folt-1;F02A9.4;F26A3.4;F43G6.8;T07G12.2;T07G12.4;T16G12.3;Y106G6G.2;F41C3.8;F58F6.6;nep-2;ZC196.9;F38G1.3
21ur-3696	1.28714	5.20319	0.00978726	0.959529	2.42152955165366 ± 0.676988069137617	IV	5212725	5212745	+	21ur-3696	ceh-40;clp-4;fkb-8;gln-1;gln-5;lin-49;rde-1;alg-4;xnp-1;tag-325;C47F8.3;F14H8.4;ash-2;Y38E10A.3;afmd-2;Y116F11A.1;efr-3;F22H10.1;hmbx-1;F59B1.10;fbxc-24;Y110A2AL.1;set-18;bus-18;folt-3;hch-1;rme-6;ufd-3;R05D11.9;clec-29;irld-56;ZC376.6;ZK849.6;sgca-1;fpn-1.2;lfi-1;ZK6.8;tag-241
21ur-329	1.0065	5.50076	0.00984486	0.959529	2.03897925901869 ± 0.35535049738449	IV	14975060	14975080	-	21ur-329	npp-8;tap-1;ugt-47;C06E7.2;F39B2.3;fbxb-87

## Sheet: comparison 5
piRNA	logFC	logCPM	PValue	FDR	fc_sem_basedOnpseudo.counts	chr	startPos	endPos	strand	ID	Targets	Clash Supported Targets
21ur-6173	2.01789	3.89625	0.00144148	1	4.07486955424414 ± 0.306336747206842	IV	16704283	16704303	-	21ur-6173	NA	NA
21ur-2209	-1.53866	4.53705	0.00226167	1	0.301160112784584 ± 0.133709197450582	IV	14864367	14864387	-	21ur-2209	srg-6
21ur-11494	-1.53874	4.53705	0.00226914	1	0.301160112784584 ± 0.133709197450582	IV	14864368	14864388	-	21ur-11494	NA	NA
21ur-10144	-1.53881	4.53705	0.00227662	1	0.301160112784584 ± 0.133709197450582	IV	14864370	14864390	-	21ur-10144	scpl-4;C03G6.17
21ur-2715	-2.21594	3.2172	0.00377565	1	0.160907972736526 ± 0.0777373505585897	IV	14228321	14228341	-	21ur-2715	ajm-1;col-46;gei-4;nas-14;vab-10;H03A11.1;Y40B1B.7;ZK792.1;ZK829.1;C17F3.3;ddx-23;Y47A7.2;dpy-21;pqn-21;srh-257;pot-3;cutl-18;M01B2.10
21ur-2011	1.74523	3.88249	0.00428069	1	3.39345681662659 ± 0.317214494196346	IV	15506818	15506838	+	21ur-2011	bbs-2;dnj-12;gcy-17;ngp-1;ret-1;soc-2;twk-29;C46C2.3;F15D4.6;F22G12.3;T25B9.6;dkf-1;Y39B6A.33;faah-6;ZC373.5;B0212.3;math-9;aagr-1;ugt-36;polk-1;F25A2.1;rod-1;M57.1;R04A9.6;fbxa-71;clik-1;mltn-6;Y56A3A.41
21ur-7883	2.6992	3.17181	0.00503046	1	6.74308278009932 ± 1.55461546084575	IV	16005213	16005233	+	21ur-7883	NA	NA
21ur-14038	-1.63528	3.65922	0.00517805	1	0.263855668111561 ± 0.113305958437324	IV	15771139	15771159	+	21ur-14038	aars-1;dhs-30;C02F4.5;F44E5.2;K09B11.5;rle-1;R09E10.5;F35H12.6;F41C3.11;ruvb-2
21ur-13894	-1.6344	3.65223	0.00552843	1	0.264480489153661 ± 0.142159814299415	IV	15390780	15390800	-	21ur-13894	C28G1.4;elks-1
21ur-6753	3.0396	2.88091	0.00640336	1	12.7409224337045 ± 1.61543913228245	IV	16279402	16279422	-	21ur-6753	ntl-3;tom-1;hecw-1;panl-2
21ur-7203	-1.46724	5.30654	0.00697897	1	0.336668212725939 ± 0.208163199172916	IV	15890189	15890209	+	21ur-7203	aha-1;atm-1;dcr-1;dpy-22;eat-6;gex-2;gst-37;hcp-4;mbk-2;mog-5;ptr-15;sma-1;ttn-1;toc-1;twk-36;vab-8;wrn-1;scpl-1;C07E3.8;C09E9.1;mrps-22;ccdc-55;C18E9.7;C28A5.2;rskn-2;C55A6.7;F11A10.5;F20C5.5;myo-6;F55H12.3;T25G3.1;rga-1;nmy-3;Y43F8A.2;pdpr-1;Y106G6D.5;anmt-1;C13A2.3;ttc-4;C17G10.7;C45G9.10;lmd-4;F16G10.2;clec-180;F53G2.1;trx-5;ephx-1;R03H10.2;npr-31;T20D4.7;T23F2.2;T23H2.3;jhdm-1;rft-2;Y50D7A.3…
21ur-858	4.82121	2.79323	0.00969596	1	209837582834955424 ± 97791766471507936	IV	14384559	14384579	+	21ur-858	dnj-15;gip-1;htp-2;ncx-3;nhr-127;npp-14;rbd-1;ret-1;srw-9;str-12;str-92;sul-2;ttn-1;abcf-1;unc-68;unc-104;xol-1;chil-3;srsx-29;eif-2Bepsilon;F07H5.6;F18C12.3;kbp-3;uig-1;F44G4.1;dbn-1;K10D11.4;pad-2;T21C9.6;clec-108;ZK1098.3;B0034.5;glb-10;C30G12.1;atic-1;F18E9.1;pgal-1;T24E12.10;Y38C1AA.9	rbd-1;xol-1;chil-3;kbp-3

## Sheet: comparison 6
piRNA	logFC	logCPM	PValue	FDR	fc_sem_basedOnpseudo.counts	chr	startPos	endPos	strand	ID	Targets	Clash Supported Targets
21ur-1427	-3.73896	3.47846	2.51625e-05	0.1406	0.0661095884341496 ± 0.0375687165807521	IV	5033690	5033710	+	21ur-1427	atp-3;pop-1;srw-107;smgl-1;R05H10.7;R10H10.3;Y43D4A.6;nhr-238
21ur-13860	-3.73887	3.47846	2.52787e-05	0.1406	0.0661095884341496 ± 0.0375687165807521	IV	5033691	5033711	-	21ur-13860	ergo-1
21ur-9652	-1.50983	4.47189	0.00387334	1	0.348351530239365 ± 0.035972219073689	IV	6489352	6489372	-	21ur-9652	Y67A10A.2
21ur-3769	-1.86921	3.74555	0.00391839	1	0.276545506050411 ± 0.0210414228021122	IV	5113614	5113634	+	21ur-3769	npp-12;pho-1;skn-1;C49C3.9;srab-2;cla-1
21ur-3365	-1.86915	3.74555	0.00392846	1	0.276545506050411 ± 0.0210414228021122	IV	5113618	5113638	+	21ur-3365	lir-1;C56G2.4
21ur-3367	-1.86913	3.74555	0.00393204	1	0.276545506050411 ± 0.0210414228021122	IV	5113615	5113635	+	21ur-3367	kin-24;npp-12;C49C3.9;gmd-2;K01C8.1;cla-1;K05F1.6
21ur-11839	-1.84047	3.96181	0.00448656	1	0.278778521797884 ± 0.0658806695876056	IV	15880634	15880654	+	21ur-11839	dnj-16;lbp-3;lrp-1;W09D6.1;npr-13;ZK673.11;B0205.1;F25E5.5;K08A2.4;ZC155.2
21ur-11888	-1.84046	3.96181	0.00449001	1	0.278778521797884 ± 0.0658806695876056	IV	15880635	15880655	+	21ur-11888	fmo-2;lbp-3;unc-16;cec-3;enol-1;W09D6.1;tbc-11;K08A2.4;nprt-1;F21C10.17
21ur-2196	-1.99245	3.37717	0.00465119	1	0.229642532152665 ± 0.0743895515279379	IV	5520565	5520585	+	21ur-2196	ced-12;srg-61;zyg-8;F39H2.3;M03C11.6;lgc-52;ipmk-1;C30G12.1;atg-16.1;ekl-7;lrk-1;ogt-1;lex-1;R03G8.4;sec-16;ZK381.8
21ur-4867	1.97698	3.34336	0.00495208	1	5.25088148266109 ± 0.628311501742296	IV	16448403	16448423	-	21ur-4867	che-11;ego-2;gly-3;gon-2;klp-12;lrp-1;ocr-1;snf-6;T08G11.1;Y37A1B.4;prp-6;ZC84.1;spv-1;acer-1;F44A2.3;H01M10.2;sgca-1;T10E10.4
21ur-6141	-1.19474	6.08293	0.00508116	1	0.431622624484913 ± 0.0447021748988214	IV	6083113	6083133	+	21ur-6141	gbh-1;klp-6;mec-4;nsy-1;twk-2;F31C3.3;R07D5.2;T14G8.3;Y70G10A.2;ttr-35;sulp-3;T05E7.4
21ur-1412	1.69672	4.52752	0.00556556	1	3.21276026903913 ± 0.880210730309545	IV	15122730	15122750	-	21ur-1412	adt-2;alh-4;apd-3;apb-3;atf-2;bar-1;ceh-44;chd-3;clp-3;col-142;col-150;cyk-3;cyn-15;dnj-12;dop-2;dpy-27;egl-45;eif-3.G;evl-14;fli-1;gei-14;hcp-6;hlh-14;hpr-9;ida-1;ina-1;lam-1;let-716;lin-3;lin-59;mdt-6;mel-11;mut-16;nas-6;nca-2;odr-4;pqn-15;swsn-4;ptr-6;ran-2;rbd-1;rde-1;ref-1;ret-1;sax-3;srh-203;sri-74;sup-17;taf-8;tag-4;itsn-1;lim-9;nlg-1;ttn-1;tag-131;tag-153;unc-84;vab-8;xnp-1;zyg-1;utp-20;B…
21ur-12697	1.69672	4.52752	0.00556895	1	3.21276026903913 ± 0.880210730309545	IV	15122727	15122747	-	21ur-12697	unc-89;B0462.4;C27C12.3;C56A3.5;H21P03.2;miz-1;T09B9.5;dct-16;ztf-22;C01B10.3;C18H2.1;C50F7.5;F07C3.3;attf-5;T14B4.1;flp-28
21ur-6031	1.2561	6.19482	0.00636771	1	2.37451287974373 ± 0.512548230794487	IV	16556699	16556719	-	21ur-6031	add-2;col-177;lin-41;lrp-1;mua-3;rol-3;ser-2;sra-34;srb-3;srh-89;srw-51;srx-46;sdhb-1;plrg-1;sart-3;C05C10.2;srsx-37;srsx-36;T28D6.5;Y17G7B.19;Y37A1A.2;sdz-2;C25E10.5;F26A10.2;F29A7.6;sdz-23;T20D4.11;mis-12;gck-2;F26G1.11;ZC513.14;C13C4.8;Y69A2AR.46
21ur-14239	1.2561	6.19482	0.00637039	1	2.37451287974373 ± 0.512548230794487	IV	16556698	16556718	-	21ur-14239	daf-18;lrp-1;nhr-5;srh-89;srv-6;plrg-1;AC3.5;sart-3;C06A12.3;C27A7.1;pyp-1;F13G3.7;F49C12.12;fbxa-135;T28D6.5;Y41C4A.9;ZK666.8;C25E10.5;F56B3.9;sdz-23;T20D4.11;srz-97;clec-250;C25F9.11;F26G1.11;ZC513.14;C13C4.8
21ur-7137	1.2561	6.19482	0.00637356	1	2.37451287974373 ± 0.512548230794487	IV	16556700	16556720	-	21ur-7137	add-2;dnj-29;frh-1;glt-4;inx-7;mua-3;plk-2;parp-2;pmp-3;srh-89;sup-17;sdhb-1;sart-3;thn-1;thn-3;thn-2;F34H10.2;thn-4;F54B11.9;K02E11.6;fbxa-135;Y79H2A.3;F37A4.4;cyp-33C5;cyp-33C4;T07F12.2;T19A5.1;gck-2;pdp-1;F26G1.11;ZC513.14
21ur-10538	-1.00919	9.23395	0.006637	1	0.496714809331027 ± 0.0348267404725003	IV	6260940	6260960	-	21ur-10538	atp-2;gst-24;haf-3;unc-22;unc-60;ttr-39;F13A7.11;clec-161;T24B8.3;F01F1.3;R119.3;Y71H2AM.6
21ur-13871	-1.00919	9.23395	0.00664139	1	0.496714809331027 ± 0.0348267404725003	IV	6260941	6260961	-	21ur-13871	atp-2;col-175;dhp-2;fkb-5;ncx-3;unc-22;unc-44;F13A7.11;clec-161;Y71H2AM.6
21ur-9017	-1.28249	5.52579	0.00768053	1	0.422588976777574 ± 0.0724722241348412	IV	6682632	6682652	-	21ur-9017	ckb-1;spr-1;srw-13;T17A3.12;fbxa-74
21ur-10904	-2.26784	3.19223	0.00776651	1	0.185559463918823 ± 0.0660586786623609	IV	5883384	5883404	-	21ur-10904	acy-1;amx-1;eat-3;pqn-87;ttn-1;twk-26;F56A8.5;scl-21;chil-10;arid-1
21ur-11318	-2.26791	3.19223	0.00777616	1	0.185559463918823 ± 0.0660586786623609	IV	5883385	5883405	-	21ur-11318	ttn-1;twk-17;unc-52;wsp-1;C23H4.2;F25B3.5;fbxa-185;F56A8.5;lron-14;W03H9.2;W04A8.2;scl-21;ZK945.4;chil-10;C52E2.4;T08B6.9;ZC487.1;nep-25;lsy-12
21ur-14513	2.13005	3.02942	0.00792494	1	5.9584994559436 ± 0.707709768513054	IV	17244537	17244557	-	21ur-14513	C36B7.5
21ur-8477	2.13006	3.02942	0.00792567	1	5.9584994559436 ± 0.707709768513054	IV	17244539	17244559	-	21ur-8477	NA	NA
21ur-11705	2.13006	3.02942	0.007926	1	5.9584994559436 ± 0.707709768513054	IV	17244536	17244556	-	21ur-11705	egl-36;madd-3;C36B7.5
21ur-11311	-2.57068	2.76094	0.00843729	1	0.116896289218962 ± 0.114920492055483	IV	5824750	5824770	+	21ur-11311	F32B6.10;mxt-1;mrpl-38;Y71G12B.31
21ur-4028	-2.23021	3.39887	0.00844985	1	0.21787887415004 ± 0.10670733450006	IV	15544729	15544749	+	21ur-4028	E03H4.4;fbxb-72;F52C12.6
21ur-2998	-1.4041	4.42504	0.00889691	1	0.353270092601646 ± 0.0684666803200724	IV	14287105	14287125	+	21ur-2998	gcy-12;sid-3;srw-85;unc-70;istr-1;F18E3.10;K09F6.6;Y64H9A.2;vamp-7
21ur-10848	1.41913	5.04041	0.00917056	1	2.76001757230238 ± 0.88436632033392	IV	16014934	16014954	-	21ur-10848	bbs-2;cdh-4;cft-1;flp-19;gcy-11;grl-1;grl-3;isw-1;lem-3;let-268;let-526;lrp-1;mom-4;pek-1;pik-1;pld-1;ptr-4;rps-23;sax-2;skr-7;skr-10;sma-2;sra-12;srh-48;sue-1;dgk-4;twk-32;unc-76;C01G10.9;C05D12.2;C15C6.4;C23H4.6;C25G4.7;csa-1;F19C6.4;F21G4.6;F33H1.4;oac-19;F39B2.8;F40G12.11;F44F1.4;hecw-1;fbxa-134;F49C12.9;F53B6.7;F56D5.9;rde-12;set-14;T28C6.7;T28D6.5;W02B8.2;dkf-1;Y6D1A.2;nmy-3;fbxa-107;Y38H6C…
21ur-6924	1.45796	4.13527	0.00958809	1	3.28803262724764 ± 0.264122477640267	IV	16130754	16130774	+	21ur-6924	gei-8;gon-2;ifg-1;kup-1;nhr-104;pbo-4;smg-3;sri-26;srj-11;str-207;dgk-4;unc-16;unc-70;unc-77;zyg-11;tag-179;B0491.7;C12D8.15;C13C12.2;D1054.1;acox-1.1;F28H6.6;F37A8.5;cnnm-5;T01B7.5;sas-1;ZK678.3;B0507.1;C03B8.2;dyci-1;memo-1;C42C1.8;C50F2.1;srz-24;F53A10.2;hmbx-1;F55C12.5;K03B4.1;M02D8.5;T14B4.3;T24A6.1;T25B6.4;T26A8.1;W05G11.2;nbet-1;F59A3.13
21ur-1116	1.45799	4.13527	0.00959344	1	3.28803262724764 ± 0.264122477640267	IV	16130751	16130771	+	21ur-1116	col-177;fkh-9;frm-9;kqt-1;kup-1;ncx-7;pqe-1;rho-1;snf-12;srh-99;srh-100;sri-26;srx-45;srx-136;sym-1;tre-3;unc-22;unc-103;B0001.3;jmjd-3.3;ugt-21;rin-1;F13D12.8;F21G4.6;F55H12.3;F59A1.15;toca-2;M106.2;nduo-5;R13H4.6;cyp-34A1;scl-18;slc-17.4;set-25;lipl-8;Y69H2.9;cyp-42A1;ccdc-47;C06G1.1;C10G8.3;C37C3.1;grsp-4;tofu-2;F40H3.3;F48A11.4;F52H2.6;R03G5.6;Y46E12BL.2;trpp-1;Y34F4.6

## Sheet: comparison 7
piRNA	logFC	logCPM	PValue	FDR	fc_sem_basedOnpseudo.counts	chr	startPos	endPos	strand	ID	Targets	Clash Supported Targets
21ur-5271	2.00865	4.85113	0.000489604	1	4.35130670520763 ± 1.62591006151368	IV	16103522	16103542	+	21ur-5271	dhp-1;set-2;srg-51;unc-70;mct-2;srbc-2;srbc-1;mct-1
21ur-1135	-1.47699	6.17986	0.000586331	1	0.359421577942865 ± 0.048424372192918	IV	14707515	14707535	-	21ur-1135	cul-2;glh-2;hmg-1.2;let-805;nhr-121;nuo-1;ptr-6;unc-89;C30H6.5;cut-3;eea-1;acc-4;zipt-2.3;parn-2;ZK632.5;C03G6.17;pdfr-1;C44E4.5;syf-1;F31A3.5;F56F10.2;fbxa-11;oac-50;fbxa-13;Y57G7A.6;fbxa-80;irld-64;lsy-12;gst-31;ksr-2;sel-1;C09G1.2;myrf-2;cfp-1;capg-2;F58D12.3;fbxa-206;shk-1;srz-70;T07F8.1;W03F11.4;ZC21.8;ZC477.2;fbn-1
21ur-9046	-4.24388	3.59201	0.000719314	1	0.0405878791976235 ± 0.0379625664252655	IV	16040957	16040977	+	21ur-9046	lrx-1;pry-1;srd-7;srd-12;srh-68;tlk-1;2RSSE.1;C33G3.6;xbx-6;K05C4.2;ipla-7;ZK632.12;F56C9.3;srt-54;Y97E10B.1;Y53F4B.62
21ur-2580	2.59266	3.41028	0.000912449	1	8.33068049442788 ± 1.41578079021696	IV	5195759	5195779	+	21ur-2580	dpy-27;gab-1;pqn-83;sir-2.3;snf-1;sre-2;twk-37;ulp-5;chil-3;pals-7;fbxa-174;amph-1;fbxa-102;R09H10.5;trcs-2;abcf-2;lgc-7;srbc-7;fbxb-88;ubr-4;F10C5.2;nuo-4;T19D7.6;ZC239.15
21ur-5596	1.90065	4.21793	0.000913831	1	3.94819325086871 ± 0.460896698444477	IV	13806485	13806505	+	21ur-5596	fars-1;glr-3;ins-12;let-99;nhr-28;pab-2;ret-1;rig-3;trr-1;ugt-1;F40F9.10;F54B3.1;psf-1;arrd-17;Y38H8A.4;cccp-1;Y53F4B.21;lgc-34;VC5.2;W03F8.4;M01D1.12
21ur-8475	-2.71088	3.12843	0.00121358	1	0.12571692930595 ± 0.117873288874455	IV	13649468	13649488	-	21ur-8475	dic-1;snr-3;srh-21;sri-11;F13D12.10;F57G12.2;golg-4;K08E4.3;T05A1.5;Y17G7B.20;ZK550.3;F17E9.2;tut-1;F43C11.6;T02H6.1;ogdh-1;mrps-2;plpp-1.2;Y25C1A.8;Y41D4A.6;Y55D5A.1;him-19;W10C8.6;fbxa-143
21ur-7508	1.86631	3.88455	0.00177168	1	4.78186089143301 ± 1.02823423407929	IV	5593664	5593684	+	21ur-7508	srw-4;cyp-35D1;nth-1;F57B10.8
21ur-13689	-5.33535	3.03522	0.00233597	1	1.82896084995711e-17 ± 0	IV	6596561	6596581	-	21ur-13689	dcp-66;egl-20;gei-4;gur-4;gcc-1;let-765;lip-1;nlp-29;pkc-1;pmk-3;sax-3;unc-89;ver-3;C07A9.5;C15C8.7;nrx-1;C35C5.10;C54C6.6;pyk-1;F32D8.10;F58A4.6;F58D5.5;K02E11.4;K04H4.2;K10D3.4;pix-1;R08B4.3;T05G5.1;T06C12.11;rbm-22;Y105E8A.14;svop-1;C18H9.3;C25F6.7;C28H8.5;tag-250;C32D5.11;F16B4.2;icmt-1;flcn-1;F23F1.4;nop-1;F41C3.6;sptl-2;fbxa-145;plpp-1.1;fncm-1;emc-1;pup-2;mgl-3;Y37E11AM.3;trpl-3;trpl-4;Y67…
21ur-34	-1.89438	3.44573	0.00266597	1	0.205235438331826 ± 0.0917894546165796	IV	15874138	15874158	-	21ur-34	rad-50;K09E2.1;R107.9;epg-5;dgk-5
21ur-12270	-1.89451	3.44573	0.00267296	1	0.205235438331826 ± 0.0917894546165796	IV	15874141	15874161	-	21ur-12270	gex-3;srg-67;srh-99;srw-41;K01F9.2;B0348.1
21ur-9747	1.19416	6.08249	0.0032201	1	2.30860458188063 ± 0.234069477622369	IV	5515093	5515113	-	21ur-9747	bre-2;che-1;dpf-6;epi-1;gly-19;lin-35;ltd-1;ntl-2;snf-10;srb-1;srb-2;srh-74;srgp-1;C23H4.6;drsh-1;cyp-14A4;srxa-8;vglu-3;clec-34;srt-11;W04G5.4;Y48E1B.8;Y54G9A.9;Y67A10A.9;kri-1;C01B4.8;npr-19;pde-5;C33E10.6;pks-1;C48B6.2;nmur-3;F22F1.3;folt-2;odr-8;K04G7.1;K10C2.1;mop-25.1;cnnm-2;met-2;cec-6;W03F9.1;Y19D10A.5;ift-139;toe-1;R13A5.15
21ur-5665	-1.17379	5.98317	0.00326657	1	0.424916734688762 ± 0.0741597938182906	IV	14202798	14202818	+	21ur-5665	bir-1;her-1;clec-182;srt-43;wdr-46;Y7A5A.7;irld-56;Y51A2A.5;pot-1;swd-2.2;F26F12.5;Y49F6C.6;xpc-1
21ur-13202	1.79741	3.84448	0.00356763	1	4.47230840996325 ± 1.33091110359158	IV	5333887	5333907	-	21ur-13202	cyk-1;cyk-3;dnj-26;phy-2;cutl-27;maph-1.2;F33H2.6;ZC116.3;C25G6.3;igcm-2
21ur-6489	1.79743	3.84448	0.00356824	1	4.47230840996325 ± 1.33091110359158	IV	5333888	5333908	-	21ur-6489	anc-1;atp-3;cdl-1;cyk-3;acdh-13;gcc-1;snf-2;pbrm-1;cutl-27;F33H2.6;F52B5.3;M162.5;R05D11.9;C25G6.3;K07H8.10;epg-7;Y48G8AL.10;Y73B6BL.27;C46C2.7
21ur-10664	-5.23587	2.98046	0.00373524	1	1.97361015228137e-17 ± 0	IV	6596563	6596583	-	21ur-10664	amt-1;cmd-1;dat-1;die-1;cks-1;gei-17;grl-7;lite-1;hmr-1;kin-20;let-765;nas-3;nhr-3;pept-2;pqn-85;prk-1;rab-37;rgr-1;srg-47;srg-56;unc-57;C15C8.7;nrx-1;C35C5.10;C46F11.5;xpf-1;slrp-1;otub-3;F35C11.5;F57A8.1;K09E4.2;pix-1;ttr-28;zipt-9;rbm-22;T21C9.6;Y57A10B.2;fbxa-111;Y105E8A.3;svop-1;H40L08.2;cpna-2;C06A6.4;C28H8.3;tag-250;ugt-40;icmt-1;F36H5.8;F41C3.6;sulp-3;F41H8.2;npax-2;mrps-16;T04B8.5;T05A8.…
21ur-6643	-1.35537	4.89999	0.00511147	1	0.356879723950313 ± 0.11504357792062	IV	15875583	15875603	+	21ur-6643	NA	NA
21ur-4197	-1.05431	6.60903	0.0057887	1	0.480463765652494 ± 0.0630328299924793	IV	14163248	14163268	-	21ur-4197	NA	NA
21ur-1249	-1.05431	6.60903	0.00579651	1	0.480463765652494 ± 0.0630328299924793	IV	14163249	14163269	-	21ur-1249	rbg-1;D1081.7
21ur-13201	-1.4283	5.67914	0.00612207	1	0.372958432483473 ± 0.112830834637274	IV	14050415	14050435	-	21ur-13201	srd-47;taf-2;F09E5.11
21ur-8376	-1.13347	5.62778	0.00639031	1	0.430397840252178 ± 0.114581972363425	IV	15509711	15509731	+	21ur-8376	aqp-5;isw-1;rbc-1;rpl-7;twk-9;secs-1;F15D4.2;M01F1.4;vps-11;T01H3.5;T13H5.1;coa-4;ucr-2.1;Y43C5A.2;C29F5.1;F09C12.6;oac-29;F53H1.3;F55A12.5;tin-44;ufbp-1	rpl-7
21ur-12560	-1.06618	6.65937	0.00644484	1	0.472313026444913 ± 0.101702692244878	IV	14597131	14597151	+	21ur-12560	asp-3;cyn-15;dnj-27;ech-1.1;egl-19;mlc-1;mpz-1;nmy-2;mdt-30;srr-3;unc-22;C29F7.2;lipl-7;kcnl-2;F28B1.2;F35C11.3;F46A9.1;F58D12.3;M05D6.1;mrpl-49;Y57G11C.31;ZK632.2;lst-6;F40E3.5;M03F8.3;math-42;T25F10.4;Y37E3.17;Y110A7A.7;Y54G2A.37;T01D1.7
21ur-3018	-1.06618	6.65937	0.0064475	1	0.472313026444913 ± 0.101702692244878	IV	14597130	14597150	+	21ur-3018	dpf-6;hum-7;sru-35;unc-45;unc-68;nep-17;T05D4.3;srz-99;Y39B6A.16;oac-22;Y34B4A.9;egl-19;glh-1;kcnl-2;F58D12.3;R09D1.12;Y56A3A.33;ZK632.2;F56C11.6;M151.1;W10C8.4;Y23H5B.6;Y54G2A.37;lin-15A;T01D1.7	kcnl-2
21ur-7948	3.56778	3.10938	0.00673608	1	21.95234849732 ± 9.55510329692315	IV	6137182	6137202	-	21ur-7948	C37A5.7;C48D5.3;T26C5.4;ZK430.5
21ur-3271	-1.69085	4.25998	0.00675131	1	0.272122616347844 ± 0.16953618991637	IV	16118282	16118302	-	21ur-3271	apb-3;emb-4;gsk-3;mac-1;nhr-125;sma-1;lim-9;tsp-18;twk-31;unc-22;unc-82;pals-4;qns-1;F19H6.3;F21D5.7;F28C6.10;F38A1.8;K02B12.5;ath-1;K04H4.5;vps-11;R10H10.7;T28B8.3;ceh-100;Y45F3A.9;C18E3.3;C23H3.2;ubr-4;syf-1;pole-2;F18A12.7;F36H5.4;ugt-61;F49D11.4;R03H10.5;T13G4.5;T23E7.2;T28A11.4;fbxa-64;Y73C8C.8;fbn-1;pals-9
21ur-5012	2.50102	3.04308	0.00760476	1	8.00104517502602 ± 2.76912463820075	IV	13955016	13955036	+	21ur-5012	cct-6;inx-16;pll-1;rin-1;F14F8.9;R12E2.1
21ur-7203	-1.77965	5.47995	0.00760999	1	0.27722413899416 ± 0.174490370936172	IV	15890189	15890209	+	21ur-7203	aha-1;atm-1;dcr-1;dpy-22;eat-6;gex-2;gst-37;hcp-4;mbk-2;mog-5;ptr-15;sma-1;ttn-1;toc-1;twk-36;vab-8;wrn-1;scpl-1;C07E3.8;C09E9.1;mrps-22;ccdc-55;C18E9.7;C28A5.2;rskn-2;C55A6.7;F11A10.5;F20C5.5;myo-6;F55H12.3;T25G3.1;rga-1;nmy-3;Y43F8A.2;pdpr-1;Y106G6D.5;anmt-1;C13A2.3;ttc-4;C17G10.7;C45G9.10;lmd-4;F16G10.2;clec-180;F53G2.1;trx-5;ephx-1;R03H10.2;npr-31;T20D4.7;T23F2.2;T23H2.3;jhdm-1;rft-2;Y50D7A.3…
21ur-4087	4.63664	2.68651	0.00786843	1	39596317700559624 ± 7333221017348978	IV	5711382	5711402	+	21ur-4087	cca-1;chs-1;dbr-1;fbf-1;fbf-2;gei-6;hmr-1;pgp-2;ptr-6;sax-2;twk-2;trpa-1;ugt-21;C33G3.4;E01G6.3;rbm-34;oac-17;F32D8.4;F56G4.6;H01G02.1;dhhc-6;ceh-74;C18H7.7;cnnm-3;hosl-1;F08F8.4;F31F4.17;nhr-39;M03F8.3;Y71H2AM.1
21ur-9036	2.75644	2.74364	0.00786843	1	12.798974193977 ± 1.78734206915617	IV	5046629	5046649	-	21ur-9036	srw-41;rilp-1;K04C1.5;cyp-13B2;panl-3;F25B4.7;cpg-8;Y73B3A.7;ZC395.5;C18H7.12
21ur-21	4.63599	2.67277	0.00801844	1	36820013591704440 ± 9573786444608502	IV	6186929	6186949	+	21ur-21	fum-1;C03H5.3;C09B8.3;cdf-1;dars-2;fmo-2;glr-8;mat-2;sir-2.3;smd-1;sra-38;str-90;6R55.2;noca-1;clec-34;F14H12.2;fbxa-182;myo-5;T05C3.2;Y34B4A.6;trpl-3;trpl-4;Y104H12D.3;ZC21.6;C55C3.8;nhr-146
21ur-601	-1.80146	3.81455	0.00848534	1	0.249814572418183 ± 0.195156044363445	IV	14232452	14232472	-	21ur-601	NA	NA
21ur-2600	2.60478	2.68326	0.00861865	1	11.8104780571662 ± 3.40865708296497	IV	16077231	16077251	-	21ur-2600	rac-2;sym-1;srsx-19;tag-243
21ur-4563	1.25421	5.13386	0.00907735	1	2.38005223808365 ± 0.304510495572017	IV	5583665	5583685	-	21ur-4563	nhr-99;clec-166;hipr-1;bus-8;daf-2;gar-3;gpa-3;mrp-5;pgp-8;sax-2;ocrl-1;nstp-9;Y32B12C.3;Y45F10D.7;C16E9.1;coel-1;srz-24;F36A4.2;btb-7;sorf-2;K08D10.10;oac-40;ZK112.6;F22D6.8;C17E4.20

## Sheet: comparison 8
piRNA	piRNA	logFC	logCPM	PValue	FDR	fc_sem_basedOnpseudo.counts	chr	startPos	endPos	strand	ID	Targets	Clash Supported Targets
21ur-8188	21ur-8188	1.73623	5.31622	5.75263e-07	0.00422432	3.39229101423247 ± 0.224159437657104	IV	4875304	4875324	-	21ur-8188	acr-6;hap-1;nhr-2;nos-3;svh-5;tsn-1;aptf-4;T13H5.1;F58F9.4;T12E12.3
21ur-10292	21ur-10292	-3.08032	2.9638	1.38364e-06	0.00422432	0.0870441096904354 ± 0.0389091896293223	IV	6435554	6435574	+	21ur-10292	NA	NA
21ur-3454	21ur-3454	1.52165	7.8795	2.42364e-06	0.00422432	2.86171497619566 ± 0.68511297733723	IV	14382935	14382955	-	21ur-3454	apc-2;hum-5;srh-142;B0513.5;C47E12.11;C53B4.2;pde-2;anp-1;W08G11.3;Y37A1B.5;Y57A10A.1;ZK1053.4;C28G1.6;ubr-1;irld-8;F53F10.2;bath-9;set-28;lfi-1;F56H9.6;C54C8.12	apc-2
21ur-14962	21ur-14962	1.52165	7.8795	2.42449e-06	0.00422432	2.86171497619566 ± 0.68511297733723	IV	14382931	14382951	-	21ur-14962	alg-2;daf-18;dys-1;gpa-6;sel-7;syx-4;unc-24;unc-80;hgap-2;vps-36;F20C5.6;F32A11.1;pnn-1;ppat-1;T16G1.6;Y75B8A.16;rpom-1;ZC116.3;clec-117;C23H3.2;C35E7.10;C55C3.4;cla-1;F56F10.2;ephx-1;ergo-1
21ur-10045	21ur-10045	1.52165	7.8795	2.42529e-06	0.00422432	2.86171497619566 ± 0.68511297733723	IV	14382936	14382956	-	21ur-10045	bre-5;daf-12;inx-20;srw-31;srx-26;C50F4.10;C53B4.2;D2045.7;JC8.2;K04C1.5;R09A8.2;T10H4.4;T25B9.4;Y50E8A.6;dus-2;fbxa-53;T05C3.2;jhdm-1;sedl-1;bath-9;sar-1;upp-1;F11E6.11;F56H9.6;R02F11.9
21ur-8348	21ur-8348	1.49055	8.14717	2.74885e-06	0.00422432	2.81396642794965 ± 0.461058930183295	IV	5602145	5602165	-	21ur-8348	daf-7;dpy-9;lat-2;lpl-1;srx-111;lact-7;C43D7.8;F20G4.2;F54B3.1;K02D3.1;fbxa-147;Y39B6A.30;Y62H9A.11;C02G6.2;C06A6.4;C18H2.1;C46H11.3;F54E2.1;snap-29;K09D9.3;mrps-2;Y38A10A.2;ZK1127.5
21ur-735	21ur-735	-1.48072	6.92233	2.8123e-06	0.00422432	0.359494903661663 ± 0.0277294654305028	IV	5589636	5589656	-	21ur-735	dpy-2;htp-2;prx-11;tra-1;F21D5.3;ZK632.12;srz-102;C54F6.17;grl-3;xpo-2;cpna-1;unc-84;set-5;K10D6.4;slc-25A46;Y105E8A.3;B0511.11;F13B9.1;frl-1;srz-37
21ur-4918	21ur-4918	-1.15284	9.29825	3.04291e-06	0.00422432	0.450016988575961 ± 0.0251522091131984	IV	15764649	15764669	-	21ur-4918	Y22D7AR.2;cex-1;Y60A3A.25
21ur-2584	21ur-2584	1.35248	11.0304	4.56754e-06	0.00524404	2.5530062092764 ± 0.566563478031294	IV	13762282	13762302	-	21ur-2584	R09E10.5;folt-3
21ur-6712	21ur-6712	-1.82575	4.48114	4.72181e-06	0.00524404	0.278993009355541 ± 0.0336232497878687	IV	6544393	6544413	-	21ur-6712	srh-92;oac-20;ugt-57;Y73B6A.1
21ur-5997	21ur-5997	-1.09288	8.43488	6.13113e-06	0.00619021	0.466717061674864 ± 0.0326032346926037	IV	6114548	6114568	+	21ur-5997	srw-103;T27E4.1
21ur-6009	21ur-6009	1.40057	8.07057	6.80885e-06	0.00630159	2.63470767378588 ± 0.496099764798634	IV	14667793	14667813	+	21ur-6009	div-1;gcy-15;gcy-18;gcy-21;let-805;mrp-1;pcp-1;pgl-1;pqn-41;spo-11;sra-21;srj-21;unc-44;trpp-9;scl-24;F53F8.3;capg-2;chd-1;fbxa-197;T23G7.3;T28C6.8;lron-10;Y39B6A.30;Y43F8B.12;sinh-1;scrm-3;tsg-101;flh-2;C50D2.5;C56C10.9;C56C10.11;bath-27;irld-29;dip-2;F28F9.2;hda-6;clec-78;aagr-4;F59E12.3;H10E21.4;irld-40;K08F11.1;Y50D4A.4;ZK688.5;cpsf-4;ZC21.10;W03D8.11;T27F7.4;che-3;ckk-1;dyf-1;fut-8;gck-1;gst…	C50F4.6;Y51H7C.7
21ur-434	21ur-434	1.26963	7.25819	8.93795e-06	0.00751935	2.40572053409841 ± 0.221698573112975	IV	15384654	15384674	-	21ur-434	K10G9.2;cht-3;acr-23;dnj-12;mec-4;mdt-17;D1081.6;F26F2.1;fdps-1;glb-29;gad-3;F15E6.6;che-10;thoc-1;T20B12.3;T27A10.6;fbxa-66	dnj-12
21ur-1221	21ur-1221	-2.56816	3.68953	1.05322e-05	0.00751935	0.156125515580895 ± 0.0701060854087819	IV	5951929	5951949	-	21ur-1221	nhr-117;dgat-2;clpf-1;K08C9.2;Y57A10C.8;Y75B8A.32;gcn-2;ZK550.4;ZK1321.4;C18A3.10;F39C12.1;F53H8.3;oac-41;pqbp-1.1;F58G6.9;T24C4.8;mpz-1;nhr-116;rig-4;spe-39;srw-26;unc-10;zyg-9;acs-20;F49D11.3;H11E01.3;Y50D4C.5;Y73B6BL.31
21ur-6496	21ur-6496	-1.75873	4.24082	1.17187e-05	0.00751935	0.285172384825928 ± 0.0345280930042236	IV	6576592	6576612	-	21ur-6496	rfc-1
21ur-6405	21ur-6405	1.21082	10.1279	1.32176e-05	0.00751935	2.31262890748107 ± 0.4487253908624	IV	15326727	15326747	-	21ur-6405	che-3;chs-2;fmo-1;srh-231;C01G10.10;C14H10.3;F13D2.1;W09G3.1;slc-17.3;C15B12.1;C49A9.9;srt-16;E02H9.3;fbxc-54;R03H10.6;Y73C8C.3;unc-5;irg-4;H40L08.3;alg-3;T24B8.4;bath-36;Y105E8A.3;ugt-51;K09F6.7;F44E5.15
21ur-4375	21ur-4375	1.24131	12.163	1.34268e-05	0.00751935	2.36349229690518 ± 0.415996414664734	IV	14126024	14126044	-	21ur-4375	bre-1;cep-1;ears-1;haf-4;lig-1;mec-12;nhr-102;tank-1;ric-3;rme-8;sax-2;srw-36;unc-82;ver-4;glp-4;C33G3.4;ztf-2;F15B9.6;F29G6.1;F38A1.8;cal-7;magu-4;cbd-1;chd-1;dod-17;T06E4.5;pash-1;W04A8.6;Y44A6D.2;eif-2Bbeta;asna-1;dbt-1;arrd-4;npr-19;math-8;C45G9.10;C50C3.2;F01F1.3;F37A4.4;nhr-142;nep-16;F56F4.3;K09H11.4;R05F9.11;R05G9R.1;erfa-1;fbxa-60;T21D12.7;nhr-226;sknr-1;Y32H12A.7;mbtr-1;cdh-12;prp-31;F4…
21ur-2473	21ur-2473	1.11945	8.60211	1.35052e-05	0.00751935	2.17078202065626 ± 0.270033382076335	IV	16870043	16870063	-	21ur-2473	ggr-1;gst-5;lrp-1;nas-32;qui-1;vit-6;wee-1.3;eif-2Bdelta;M05B5.4;rev-1;ubr-4;T23E7.2;Y39F10B.1	rev-1
21ur-8082	21ur-8082	1.11945	8.60211	1.3524e-05	0.00751935	2.17078202065626 ± 0.270033382076335	IV	16870040	16870060	-	21ur-8082	wee-1.3;F49B2.6;nphp-4;pde-1;scav-2;ZK856.5;sec-10;F18A1.1;hda-6;F47E1.1;F17C8.9
21ur-11405	21ur-11405	1.11945	8.60211	1.35411e-05	0.00751935	2.17078202065626 ± 0.270033382076335	IV	16870044	16870064	-	21ur-11405	ggr-1;lrp-1;mrp-7;qui-1;srr-2;set-6;eif-2Bdelta;M05B5.4;ain-1;ubr-4;R05G6.10;btb-12
21ur-5217	21ur-5217	-1.42084	5.65976	1.81545e-05	0.00960113	0.361618781538063 ± 0.0582828054063922	IV	15763871	15763891	-	21ur-5217	puf-3;C47E12.11;C56A3.6;C52B9.4;Y47G6A.26;puf-11;C15H11.13
21ur-1903	21ur-1903	1.1304	9.43473	2.1394e-05	0.0103745	2.1900406190604 ± 0.343289472245299	IV	15549690	15549710	+	21ur-1903	flp-9;gon-14;npp-3;rnp-6;snf-9;srh-271;srp-1;str-178;uggt-2;F49B2.6;cyp-31A2;sec-10;mage-1;K12H6.6;T09B4.5;aqp-4;spd-3;twk-30;vha-11;F07B10.4;F16C3.1;R09H10.1;scpl-4;ZK896.1;C28H8.3;F10G7.10;ech-1.2;W03A5.6
21ur-839	21ur-839	2.06978	5.19315	2.23189e-05	0.0103745	4.10780766975931 ± 0.559992127415569	IV	15845457	15845477	-	21ur-839	srg-28;sars-2;taf-1;ttn-1;ubc-8;D2030.11;F19B2.5;F55A11.4;T05D4.5;ztf-22;sfa-1;rha-2;C24H12.4;F09E5.11;clec-180;F53G12.8;dop-3;Y57G7A.5;syx-16;Y41E3.18;acy-1;cbp-1;cyn-16;msh-6;pat-3;pyc-1;mrck-1;C06B8.2;C07A9.5;C17D12.3;ehbp-1;F33H1.4;K07F5.14;R07B7.10;T04F3.1;T13H5.8;Y47H9A.1;sinh-1;B0496.6;C28C12.12;C42C1.13;C50D2.6;E02C12.6;F37A4.4;F46C8.1;R02F11.4;set-15;T01B10.5;Y34B4A.8;josd-1;F59A6.12
21ur-5750	21ur-5750	1.9064	5.21056	2.27385e-05	0.0103745	3.65572022865999 ± 0.815400535421268	IV	14102889	14102909	+	21ur-5750	acr-2;anc-1;cdh-9;chs-1;dpy-22;ego-1;fmi-1;kgb-1;lig-1;lin-1;lir-2;mog-1;msh-5;nhr-69;npp-14;pek-1;pgp-4;pgp-9;pqn-41;rgs-7;srh-39;ttn-1;tbx-7;cpna-5;wts-1;chd-7;B0001.5;C11E4.6;C18E9.2;jmjd-3.3;gcp-2.2;secs-1;cfim-1;F54B11.11;K07A12.5;phf-33;M03C11.3;R11G10.2;nhr-271;T06G6.4;rmh-2;T23D8.3;T28B8.3;agef-1;fbxa-210;Y69H2.9;Y116F11B.7;ZK507.1;ZK507.3;nhr-246;ZK1053.4;cpna-2;vps-33.1;B0361.6;C06G3.6;…	ttn-1
21ur-11117	21ur-11117	3.91468	3.14668	2.33534e-05	0.0103745	17.5910316062225 ± 2.8770973991067	IV	16535689	16535709	-	21ur-11117	rme-8;unc-26;F07C6.2;srz-103;eif-2D
21ur-3085	21ur-3085	1.08644	11.2459	2.70051e-05	0.0106154	2.12331846850983 ± 0.319478989282986	IV	14644297	14644317	-	21ur-3085	tag-273;sptl-1;lem-4
21ur-5983	21ur-5983	-1.61368	5.16167	2.77594e-05	0.0106154	0.327792862042998 ± 0.0530504814513812	IV	14652731	14652751	-	21ur-5983	lgc-31;T24B8.7;prp-19
21ur-6236	21ur-6236	1.44011	9.06089	2.89274e-05	0.0106154	2.71670484636815 ± 0.561247296828786	IV	16319309	16319329	+	21ur-6236	gei-3;mask-1;F55A12.2;K07H8.5;syx-16
21ur-5965	21ur-5965	1.44011	9.06089	2.89658e-05	0.0106154	2.71670484636815 ± 0.561247296828786	IV	16319306	16319326	+	21ur-5965	clc-5;dpy-11;fmo-5;rpl-18;srh-11;tsp-7;srt-7;lron-15;Y34F4.4;madf-9
21ur-11063	21ur-11063	1.69358	5.1334	3.23354e-05	0.0106154	3.23211058900938 ± 0.364775102006739	IV	5600018	5600038	-	21ur-11063	C12D12.3;Y48G8AL.10
21ur-2638	21ur-2638	1.66402	4.66876	3.45557e-05	0.0106154	3.30411378395132 ± 0.257427520045978	IV	13956565	13956585	-	21ur-2638	lgx-1;mig-2;mtm-5;nhr-19;nhr-21;sri-29;ten-1;unc-34;spin-2;clec-227;pfas-1;aman-2;H01G02.1;R107.5;Y44A6C.2;F08F8.10;cpsf-2;clec-1;F26G1.1;F36H9.5;F56F4.4;ctsa-1;T03D3.5;lgc-54;T22F7.3;W06E11.1;W08F4.12;Y54G2A.12	aman-2;Y54G2A.12
21ur-2738	21ur-2738	1.35829	5.93808	3.47011e-05	0.0106154	2.57908889883093 ± 0.392693894115494	IV	16810588	16810608	+	21ur-2738	csn-2;gst-6;C40H1.2;D2030.2;kcnl-2;mspn-1;Y105E8B.9;Y116A8C.25;ift-74
21ur-197	21ur-197	1.20178	6.59716	3.49546e-05	0.0106154	2.2841939248857 ± 0.250224400273385	IV	17051044	17051064	-	21ur-197	ctn-1;tag-89;C08A9.3;dnc-4;mrps-18C;Y41D4A.1;pas-4;cyp-13A11;C04G6.2;C49C8.1;W06G6.17	pas-4
21ur-3483	21ur-3483	1.52669	5.37099	3.54008e-05	0.0106154	2.86946485171176 ± 0.462844180203764	IV	16581998	16582018	-	21ur-3483	fkh-3;fli-1;gfi-1;AC3.5;glna-2;F33H1.4;F44E5.4;F44E5.5;T08A11.1;slc-17.4;sre-47;gcn-2;B0511.12;C06G3.8;C28H8.7;C35E7.6;lst-6;E02D9.1;fbxb-6;F25E5.1;F35H12.6;F57F4.4
21ur-2174	21ur-2174	-1.39941	5.25094	3.73747e-05	0.0106154	0.381327471986988 ± 0.0419790339945667	IV	5832009	5832029	-	21ur-2174	F34D10.6
21ur-2511	21ur-2511	-1.2623	5.65161	3.89151e-05	0.0106154	0.415965690954942 ± 0.0242451178627377	IV	6181237	6181257	-	21ur-2511	gta-1;nhx-8;ocr-1;mdt-30;F28H6.6;fbxb-8;F28C10.3;egg-5;R119.5;egg-4;cdh-12;Y41E3.18
21ur-6752	21ur-6752	-1.07245	6.97515	3.91534e-05	0.0106154	0.47696109254465 ± 0.0242537474572984	IV	15191402	15191422	-	21ur-6752	emr-1;let-504;C04H5.1;C42D4.13;K09H9.7;W09G12.9
21ur-14327	21ur-14327	-1.07245	6.97515	3.92111e-05	0.0106154	0.47696109254465 ± 0.0242537474572984	IV	15191403	15191423	-	21ur-14327	emr-1;frm-1;let-504;C04H5.1;ing-3;C42D4.13;pud-3;F30H5.3;K09H9.7;ZK688.10
21ur-13852	21ur-13852	-2.6887	2.73106	4.09166e-05	0.0106154	0.115326917718075 ± 0.0515517583764879	IV	6428742	6428762	+	21ur-13852	vps-54;oac-6;F49B2.6;gdh-1;hex-2;oatr-1;C25F6.1;F55F10.1;K11H12.4
21ur-9760	21ur-9760	-2.6887	2.73106	4.09166e-05	0.0106154	0.115326917718075 ± 0.0515517583764879	IV	6428743	6428763	+	21ur-9760	gdh-1;H11E01.3
21ur-13283	21ur-13283	-1.0533	7.61231	4.1766e-05	0.0106154	0.483609109324002 ± 0.0370438238439105	IV	14054963	14054983	-	21ur-13283	NA	NA
21ur-2230	21ur-2230	-1.0533	7.61231	4.18107e-05	0.0106154	0.483609109324002 ± 0.0370438238439105	IV	14054964	14054984	-	21ur-2230	che-3;gei-4;lag-2;ltd-1;moe-3;nhr-85;prx-14;srp-7;srx-130;twk-39;wrt-8;nrde-1;F18A11.2;F18C12.4;nuaf-3;T10G3.4;T23G5.2;T27D12.1;such-1;ZC443.3;B0432.13;fbxl-1;C15B12.8;C18E3.1;C23H3.9;C24A3.2;mms-19;tbck-1;cpsf-2;F28B4.3;cdc-73;dgn-2;irld-11;calu-1;W05H7.1;eri-5;Y46E12BL.2;Y54F10BM.3;Y59E9AR.2;ZC196.4;bus-18;C45G9.15;Y38C1AA.19;acr-8;B0491.6;T09E11.12	B0491.6
21ur-14930	21ur-14930	1.63687	5.00885	4.26081e-05	0.0106154	3.19829535007021 ± 0.55896932020142	IV	15672870	15672890	-	21ur-14930	hum-7;nhr-126;sbp-1;srd-43;sup-37;tag-63;tag-131;rict-1;T05F1.11;Y48C3A.20;riok-2;flh-2;D2096.7;F55F8.2;T25D1.2;W02G9.4;clec-134;Y40D12A.1;npp-24
21ur-3993	21ur-3993	1.63688	5.00885	4.26704e-05	0.0106154	3.19829535007021 ± 0.55896932020142	IV	15672871	15672891	-	21ur-3993	cgh-1;gpa-4;hum-7;lrp-1;pqn-41;srd-43;srw-135;tbx-7;mys-4;C39B10.4;etc-1;mam-7;F59A1.11;clec-189;mask-1;prp-6;ugt-5;C18G1.8;C52D10.3;D2096.7;F20H11.4;F55F8.2;gpx-7;W02G9.4;clec-134;npp-24;Y53F4B.51
21ur-5140	21ur-5140	1.66915	5.14806	4.46836e-05	0.0106154	3.17938907943781 ± 0.605354490762724	IV	14099925	14099945	-	21ur-5140	cmk-1;emb-30;fce-1;hif-1;ndg-4;oat-1;rrf-3;ant-1.1;qns-1;C54G4.3;eif-2Bepsilon;F09A5.2;F19B6.1;F31C3.6;T11G6.5;T13H5.1;scpl-4;T28A8.6;rga-1;tdpt-1;B0303.7;C13A2.10;C16D9.5;F18E9.4;F52F10.2;H06I04.5;K11H12.7;T25E4.2;Y47G7B.2	ant-1.1
21ur-11154	21ur-11154	-1.2962	6.1464	4.48902e-05	0.0106154	0.40776644061019 ± 0.0664987194919714	IV	13691047	13691067	+	21ur-11154	clec-182;Y42H9B.3
21ur-1753	21ur-1753	-1.2962	6.1464	4.4924e-05	0.0106154	0.40776644061019 ± 0.0664987194919714	IV	13691044	13691064	+	21ur-1753	col-63;col-153;dpy-7;fkh-8;klp-12;let-765;mrp-7;mup-4;nhr-54;pld-1;mdt-30;rig-3;sma-6;taf-5;tnt-2;wrm-1;mdt-17;C04F12.1;cyp-36A1;kcnl-2;F20G2.2;copb-2;srpa-68;K01A11.2;R10E8.6;pges-2;nhr-271;ekl-6;Y6E2A.7;pnc-2;tag-349;sql-1;Y116A8C.11;nhr-229;C01F1.6;C02F5.12;C15B12.4;cyp-33C9;fbxb-35;fbxb-36;F10G7.9;F45F2.10;cpd-1;F59E12.9;T12E12.1;zeel-1;Y73E7A.8;K06B4.15;K10D2.8;F01E11.17;Y41C4A.32;gcy-9;lad-…
21ur-6816	21ur-6816	-1.4351	5.25292	4.89137e-05	0.0106392	0.36809364941459 ± 0.0127237983257597	IV	5425479	5425499	+	21ur-6816	cmk-1;ctn-1;mars-1;rbr-2;rnf-5;sng-1;sru-35;F35G12.7;mnk-1;pde-1;acs-1;T05A8.5;tpxl-1
21ur-3583	21ur-3583	1.18587	7.94483	5.10804e-05	0.0106392	2.27461650200719 ± 0.357400100830991	IV	17129634	17129654	-	21ur-3583	gcy-14;gcy-20;rfc-1;smu-1;C01G6.5;din-1;rpoa-2;C30B5.6;D1007.5;F31F7.1;F46F5.11;pygl-1;ZC190.5;mltn-5
21ur-12416	21ur-12416	1.18587	7.94483	5.11653e-05	0.0106392	2.27461650200719 ± 0.357400100830991	IV	17129637	17129657	-	21ur-12416	smu-1;F26F4.2;srw-22;F25H9.6;hpo-11;Y11D7A.7;marc-6;K02F6.4;R05F9.6;fbxb-81;T20H4.2
21ur-46	21ur-46	1.679	5.13188	5.19177e-05	0.0106392	3.23216897120181 ± 0.609797898361533	IV	16550084	16550104	+	21ur-46	lon-2;rig-5;F56B3.4;C08H9.3;C11H1.3;C48B4.8;F22B8.3;F35E12.9;Y5F2A.4;Y75B8A.16;T24H7.2
21ur-14098	21ur-14098	1.679	5.13188	5.19292e-05	0.0106392	3.23216897120181 ± 0.609797898361533	IV	16550086	16550106	+	21ur-14098	ads-1;daf-10;ego-1;nhr-58;sel-9;pot-3;eif-2Bdelta;F13D2.1;F46A8.3;F46A8.8;F56G4.6;F59A2.5;T09B9.3;mrpl-51;Y46G5A.18;srz-96;doxa-1;nhr-162;F49F1.10;clec-265;him-19;ZK185.1;mrpl-39
21ur-11023	21ur-11023	1.679	5.13188	5.19865e-05	0.0106392	3.23216897120181 ± 0.609797898361533	IV	16550087	16550107	+	21ur-11023	dhs-5;ego-1;nhr-58;srz-96;W08F4.5
21ur-4451	21ur-4451	-1.40362	5.1385	5.20892e-05	0.0106392	0.370767833891612 ± 0.036620464597991	IV	6398407	6398427	+	21ur-4451	apx-1;aqp-6;dig-1;klp-13;lin-36;mix-1;msh-5;osm-8;pcs-1;pqn-39;swsn-1;sdc-3;sid-1;ttn-1;uba-1;vab-10;C14B4.2;C31E10.5;pals-39;mon-2;F20C5.4;F43G6.4;F48F7.6;dot-1.4;F57G8.7;T04F3.2;T06G6.4;zim-2;sdz-31;T21C9.9;T25B9.8;mlt-11;Y11D7A.8;mrpl-37;Y105E8A.25;ZK856.5;C18H9.5;C23F12.3;cnnm-3;cogc-5;C49C8.1;C50F2.2;C52B11.5;lam-2;bath-28;F18E9.4;F26G1.1;F56C9.8;ttll-11;R07E4.1;R13A1.5;M02B7.7;F10D7.10
21ur-3093	21ur-3093	-1.29098	6.21567	5.26884e-05	0.0106392	0.410360241014634 ± 0.0516407015569397	IV	15980476	15980496	+	21ur-3093	ajm-1;ced-5;coh-1;col-75;deg-3;eri-1;cutl-27;F35H8.2;T25G3.4;ragc-1;mrpl-9;C23H3.2;npr-8;F36A4.1;F55F10.1;tat-2;gpx-6;hex-4;fln-1;H03G16.6;K03B4.8
21ur-5375	21ur-5375	-1.45173	5.63402	5.445e-05	0.0107986	0.377297750318568 ± 0.0850409287344723	IV	5343724	5343744	-	21ur-5375	sup-17;F10C2.5;R07A4.3
21ur-15147	21ur-15147	1.33837	5.98531	5.81792e-05	0.0110152	2.53274296187329 ± 0.29977396588585	IV	16745315	16745335	-	21ur-15147	srg-57;prmt-6;F08F3.6;C01F6.14
21ur-8403	21ur-8403	1.32567	6.16173	5.95321e-05	0.0110152	2.50592546847231 ± 0.355200626248912	IV	14991255	14991275	+	21ur-8403	nhr-12;F25D7.5;T01D3.6;Y39B6A.36;cbn-1
21ur-326	21ur-326	1.32566	6.16173	5.96994e-05	0.0110152	2.50592546847231 ± 0.355200626248912	IV	14991258	14991278	+	21ur-326	srw-68;D1086.3;T01D3.6;T02E1.2;ZK1225.4;clec-205
21ur-4188	21ur-4188	1.00079	10.216	6.23112e-05	0.0110152	2.00053655575524 ± 0.228245295409628	IV	15874774	15874794	+	21ur-4188	hmp-1;hpk-1;lam-3;nmr-2;sru-38;C08E8.2;mogs-1;sta-2;C50C3.1;F09E5.3;ess-2;F44A2.7;F46F11.8;swt-1
21ur-324	21ur-324	1.29621	6.26909	6.24403e-05	0.0110152	2.43275138589389 ± 0.354215794689726	IV	16791235	16791255	+	21ur-324	best-26;F59E11.5;R09F10.3;unc-77;swsn-7;C34C12.8;F54B3.1;F58D12.3;C25A11.2;Y102A11A.3;M199.134
21ur-7482	21ur-7482	1.24839	6.90891	6.34204e-05	0.0110152	2.38660612544938 ± 0.413271969157137	IV	17048494	17048514	-	21ur-7482	che-6;egl-2;emb-9;sqv-5;lmtr-3;tbc-8;uggt-2;C15F1.2;F15E6.5;F20A1.10;sdz-24
21ur-1517	21ur-1517	1.24839	6.90891	6.3473e-05	0.0110152	2.38660612544938 ± 0.413271969157137	IV	17048495	17048515	-	21ur-1517	sqv-5;dkf-2
21ur-10275	21ur-10275	1.24839	6.90891	6.3477e-05	0.0110152	2.38660612544938 ± 0.413271969157137	IV	17048491	17048511	-	21ur-10275	srd-50;vha-7;nkcc-1;clec-52;C44E4.5;fbxc-19
21ur-4952	21ur-4952	5.42365	2.63511	7.96211e-05	0.0134001	Inf ± NaN	IV	16246907	16246927	-	21ur-4952	cca-1;dsl-7;mml-1;ppk-3;pri-2;ptr-3;rbf-1;sdhb-1;F21D5.4;F35E2.8;oac-38;Y42A5A.1;K02D10.4;bris-1;ZK488.5;dim-1;eat-20;flp-18;gly-12;hsp-17;nas-15;spp-7;srx-56;srx-62;tag-96;C09G9.1;F17A2.13;T20D3.8;math-8;timm-17B.1;R02F11.3
21ur-80	21ur-80	5.42366	2.63511	7.96335e-05	0.0134001	Inf ± NaN	IV	16246908	16246928	-	21ur-80	abu-1;akt-1;ama-1;arx-1;arx-3;asb-2;btf-1;ccr-4;cel-1;cfz-2;ckb-1;cog-1;col-158;cua-1;cyn-2;cyn-8;daf-16;dhs-30;eat-6;emb-8;ent-1;evl-14;fat-3;fbp-1;fkh-7;gad-1;grp-1;gst-11;hlh-17;hlh-27;hmr-1;hsp-60;ifa-3;ify-1;ins-28;lec-3;lin-8;lrp-1;ccar-1;mat-3;mcm-2;cogc-1;dapk-1;ncl-1;ncx-1;ndx-6;nlp-9;ntl-4;nuc-1;par-6;pes-4;pfn-3;pph-4.1;epac-1;ran-3;rap-2;rig-3;rpl-20;sax-3;sdf-9;snt-2;srb-1;srd-40;srh…
21ur-13366	21ur-13366	-1.02289	8.07161	8.42872e-05	0.0135981	0.493447993976152 ± 0.0438214046947472	IV	14421689	14421709	+	21ur-13366	NA	NA
21ur-3333	21ur-3333	-1.02289	8.07161	8.42941e-05	0.0135981	0.493447993976152 ± 0.0438214046947472	IV	14421688	14421708	+	21ur-3333	col-182
21ur-6250	21ur-6250	1.50202	4.97125	8.55541e-05	0.0135981	2.79539357345394 ± 0.363091605857604	IV	15605264	15605284	+	21ur-6250	col-84;let-363;nlp-11;ppt-1;srg-16;sul-2;twk-22;scav-6;ctf-4;F21D5.6;R01H10.7;T26E4.4;W08G11.1;Y39B6A.10;sup-35;Y53F4B.20;Y54G9A.7;C06A5.3;C24A1.3;C49A9.3;dip-2;F41C3.6;cct-3;irld-42;glb-25;sftb-2;Y4C6B.3;set-29;Y6G8.9;dyb-1;E01G6.3;vacl-14;K08D8.5;fbxb-104;droe-8	vacl-14
21ur-13528	21ur-13528	1.50201	4.97125	8.57073e-05	0.0135981	2.79539357345394 ± 0.363091605857604	IV	15605261	15605281	+	21ur-13528	acr-8;cnt-2;cpb-1;dyb-1;sel-11;F13H10.3;F54D5.9;sre-4;C28C12.12;E_BE45912.2;bmy-1;H12I13.3;W04C9.6;fbxb-104;cosa-1
21ur-12509	21ur-12509	1.20389	10.6011	9.10285e-05	0.0137481	2.30331458500638 ± 0.558317094002869	IV	14647011	14647031	-	21ur-12509	eat-3;eif-3.E;let-92;srh-85;srw-41;str-118;F14D7.6;T27F6.8;C04E7.4;C05D10.4;H20J04.7;K12H6.12;srbc-67;Y71H2B.2;cpsf-1;T06E4.14;F17C8.9;C53A5.17
21ur-4411	21ur-4411	1.20389	10.6011	9.10452e-05	0.0137481	2.30331458500638 ± 0.558317094002869	IV	14647014	14647034	-	21ur-4411	csq-1;grl-15;let-502;ptd-2;spp-18;srh-174;C06B8.3;folt-1;F02A9.4;F26A3.4;F43G6.8;T07G12.2;T07G12.4;T16G12.3;Y106G6G.2;F41C3.8;F58F6.6;nep-2;ZC196.9;F38G1.3
21ur-1682	21ur-1682	3.7884	3.05199	9.22527e-05	0.0137481	16.7112646870367 ± 2.31191074267196	IV	15613706	15613726	-	21ur-1682	cyk-3;srh-24;mltn-13;mps-2;K01A2.9;T24C4.3;K01A2.12;sgn-1;T24B1.1;Y66D12A.9
21ur-2058	21ur-2058	-1.22468	6.0326	9.38922e-05	0.0137481	0.434024972563239 ± 0.0642506710680551	IV	5072747	5072767	-	21ur-2058	zif-1;F27D9.13
21ur-7174	21ur-7174	1.20579	12.46	9.42548e-05	0.0137481	2.30653067690922 ± 0.537869094663502	IV	15603855	15603875	+	21ur-7174	acr-5;unc-22;mig-32;isy-1;H05L14.1;mrpl-16;Y57G11C.43;irld-58;sdz-36;C14C6.6;F56E10.1;copa-1
21ur-6706	21ur-6706	1.21876	10.3629	9.61045e-05	0.0137481	2.3264997447846 ± 0.607502920346561	IV	16003334	16003354	+	21ur-6706	aqp-9;ndg-4;spk-1;sru-11;taf-1;uba-2;unc-22;fbxa-167;Y39B6A.30;Y64G10A.7;cla-1;slc-25A18.2;lect-2;K05F6.10;erfa-1
21ur-10963	21ur-10963	1.39334	5.83551	9.75403e-05	0.0137481	2.59837603229236 ± 0.498264392064833	IV	14311877	14311897	-	21ur-10963	gop-1;unc-112;fbxa-185;Y32F6A.5;spin-4;C15C7.7;F48C1.6;K10C2.7;ZC308.4;pdhk-2;sre-46
21ur-4854	21ur-4854	1.39334	5.83551	9.76681e-05	0.0137481	2.59837603229236 ± 0.498264392064833	IV	14311876	14311896	-	21ur-4854	gop-1;rps-2;srh-2;str-10;F31C3.3;F55D12.5;Y32F6A.5;erp-44.2;lonp-1;D1014.6;F48C1.6;F53A10.2;K10C2.7;srz-69;sre-46
21ur-12125	21ur-12125	-1.39618	6.2652	9.7794e-05	0.0137481	0.37922304998388 ± 0.0708814403317459	IV	6455764	6455784	+	21ur-12125	smgl-1;sorb-1;pals-37
21ur-6779	21ur-6779	-1.09152	6.87681	0.000100385	0.013936	0.471057257885767 ± 0.043653881458537	IV	5252887	5252907	+	21ur-6779	zif-1;F27D9.13
21ur-6652	21ur-6652	-1.06568	7.73188	0.000104256	0.0139493	0.480328257336814 ± 0.0448633561175199	IV	5529097	5529117	-	21ur-6652	lin-7;exos-1;T10E10.3
21ur-11401	21ur-11401	-1.06568	7.73188	0.000104334	0.0139493	0.480328257336814 ± 0.0448633561175199	IV	5529098	5529118	-	21ur-11401	lin-7;mec-10;romo-1;exos-1
21ur-5288	21ur-5288	1.11423	10.0919	0.000104591	0.0139493	2.16400020875816 ± 0.445289310009748	IV	16140517	16140537	+	21ur-5288	vps-33.1
21ur-3897	21ur-3897	1.27847	6.04302	0.000110122	0.0139493	2.44093845009907 ± 0.364309310692719	IV	15616639	15616659	-	21ur-3897	fmi-1;unc-2;kcnl-2;chil-25;fbxc-18;F48D6.4;fbxa-71;acp-6;sdz-34
21ur-6628	21ur-6628	1.27847	6.04302	0.000110447	0.0139493	2.44093845009907 ± 0.364309310692719	IV	15616640	15616660	-	21ur-6628	arf-3;him-6;lin-26;srx-3;dgk-4;unc-2;C06H2.7;kcnl-2;F30A10.12;chil-25;Y55D9A.2;B0218.5;C06G3.5;fbxc-18;fbxc-39;T01D1.4;T28C12.2;Y61A9LA.3;acp-6;sdz-34;ZK1127.3;H05L14.3
21ur-12041	21ur-12041	1.29932	6.17586	0.000111322	0.0139493	2.45746496768373 ± 0.486092618827576	IV	15936923	15936943	-	21ur-12041	div-1;fzo-1;hcp-1;prk-1;rol-3;spd-5;C07B5.6;set-32;F15B9.8;atz-1;F35E8.7;ubr-5;F36F2.2;Y75B12B.11;sql-1;ZK822.4;cpna-2;daf-37;F52G3.3;F54H12.5;irld-45;T05A7.6;srt-62;cdh-12;lfi-1
21ur-4872	21ur-4872	1.29932	6.17586	0.00011137	0.0139493	2.45746496768373 ± 0.486092618827576	IV	15936922	15936942	-	21ur-4872	ced-11;coq-5;div-1;klp-20;prk-1;ubr-5;clec-29;Y75B12B.11;exoc-8;sql-1;pyk-2;cpna-2;daf-37;F52G3.3;F54H12.5;polq-1;lfi-1
21ur-10780	21ur-10780	1.57712	4.70365	0.000115856	0.0139493	2.97469378047382 ± 0.171052038355749	IV	15171423	15171443	+	21ur-10780	mrp-3;T07F12.4;T22B2.5;pinn-1;tag-281;ZK1010.12
21ur-13073	21ur-13073	1.57712	4.70365	0.000115901	0.0139493	2.97469378047382 ± 0.171052038355749	IV	15171422	15171442	+	21ur-13073	R01E6.7;F56D2.2;cec-6
21ur-1762	21ur-1762	1.57712	4.70365	0.000116013	0.0139493	2.97469378047382 ± 0.171052038355749	IV	15171426	15171446	+	21ur-1762	asb-2;lin-31;pod-2;pqn-80;C49F5.6;F49E2.2;ceh-91
21ur-7296	21ur-7296	1.54684	5.23858	0.000116334	0.0139493	2.9503865496395 ± 0.608101475820215	IV	16608049	16608069	-	21ur-7296	gon-1;pal-1;pll-1;smc-4;syd-2;epc-1;C14C10.5;F19D8.2;F20C5.6;F25H8.1;T09B9.5;oac-46;ugt-54;dkf-1;Y57A10A.13;fars-2;B0207.5;C02F5.3;efr-3;F16B4.2;hpo-3;math-27;H10D18.5;Y23H5B.5;Y110A2AL.2
21ur-7550	21ur-7550	-1.21517	5.54725	0.00011665	0.0139493	0.430525636867761 ± 0.0065948898466969	IV	6171998	6172018	-	21ur-7550	mod-5;pqn-59;catp-6;F25E5.1;ipgm-1;dod-19;F26D10.13;Y48A6C.6
21ur-11413	21ur-11413	-1.21517	5.54725	0.000116809	0.0139493	0.430525636867761 ± 0.0065948898466969	IV	6171995	6172015	-	21ur-11413	pqn-59;C34F6.1;nlf-1;xpg-1;epg-7
21ur-944	21ur-944	-1.92567	3.74955	0.000122606	0.0140645	0.256541645787991 ± 0.0722077536963924	IV	15571490	15571510	+	21ur-944	acr-17;aex-2;dhs-2;emb-5;eps-8;grl-9;ifc-2;lrk-1;nas-7;nas-22;srh-304;uev-2;unc-53;unc-104;chil-7;C31E10.6;D1081.3;tkt-1;phf-34;F53H2.3;F54B3.1;srbc-75;M28.9;oac-46;T21C12.4;Y10G11A.1;Y39B6A.30;Y39B6A.41;fcd-2;tpst-1;inst-1;C06A6.4;catp-3;C18F10.7;ugt-57;F21C10.7;F48E3.9;H01M10.2;nhr-216;W06H8.6;Y34B4A.8;Y71G12B.5;Y97E10AR.4;ZC581.3;swsn-6;vps-36;F56G4.4;clec-187
21ur-14492	21ur-14492	-1.92567	3.74955	0.000122615	0.0140645	0.256541645787991 ± 0.0722077536963924	IV	15571489	15571509	+	21ur-14492	sac-1;C44B7.12;Y39A3A.4;rga-4
21ur-10487	21ur-10487	1.92919	4.60339	0.00012277	0.0140645	3.72560217851801 ± 0.90533304848007	IV	14459108	14459128	-	21ur-10487	col-91;gsk-3;ppm-1;tpa-1;C08F11.13;rtel-1;ztf-11;nphp-4;C14C6.6;M02D8.5;Y102A11A.3;ZK1236.1
21ur-15210	21ur-15210	-1.92567	3.74955	0.000122839	0.0140645	0.256541645787991 ± 0.0722077536963924	IV	15571487	15571507	+	21ur-15210	mat-1;M01E5.3;T22B2.3;Y39A3A.4
21ur-1420	21ur-1420	1.32861	5.39227	0.000129841	0.0145777	2.52517473443859 ± 0.152263850348054	IV	14306167	14306187	-	21ur-1420	akt-1;alh-12;bli-4;brd-1;inx-1;inx-16;nex-4;nhr-60;nhr-99;nlp-26;odr-4;swsn-1;ptp-3;srx-134;str-1;syg-1;twk-13;unc-18;unc-33;unc-34;unc-89;trr-1;B0001.3;C14B4.2;gbf-1;idh-2;C36B1.9;C36E8.1;etc-1;E01G6.3;ttr-21;fipr-13;F57B1.1;clec-161;F58D5.5;enu-3.1;nhr-268;R03G8.4;R06F6.8;nlp-80;rmh-2;T09E11.8;vps-25;cacn-1;Y7A9A.1;Y47D3A.21;Y51H4A.6;egas-3;Y105E8A.3;mlt-4;ZK1098.3;B0205.9;nstp-6;math-8;swsn-2.…
21ur-14538	21ur-14538	1.32861	5.39227	0.000129947	0.0145777	2.52517473443859 ± 0.152263850348054	IV	14306168	14306188	-	21ur-14538	aqp-9;nos-2;pbo-4;pgp-12;ser-2;spe-39;srd-32;srg-9;str-141;ten-1;top-1;twk-20;C05C10.2;set-32;K10H10.4;M04B2.2;clec-38;F18E9.1;irld-13;ztf-16;frpr-19;Y73C8B.1;Y92H12A.5;H01G02.4;F13A2.10
21ur-1807	21ur-1807	1.36627	6.11995	0.00014054	0.0156084	2.55212896411335 ± 0.557231325505448	IV	13682090	13682110	+	21ur-1807	daf-7;haf-4;F46B6.4;F55A11.1;K03B8.6;C06G3.6;dct-6;F33G12.6;F33H12.6;F59H6.5;H10E21.1;trap-2;Y16E11A.2;Y46B2A.2;Y77E11A.8;ZK250.9;best-19;shw-3;Y22D7AL.9
21ur-4552	21ur-4552	-1.22836	5.36958	0.000146328	0.0160903	0.422524772998943 ± 0.0242369631832999	IV	6135467	6135487	+	21ur-4552	age-1;trt-1;exc-6
21ur-10875	21ur-10875	-3.88394	2.37789	0.000153873	0.0165558	0.0443472330952185 ± 0.0419542629165528	IV	5863568	5863588	-	21ur-10875	abt-5;inf-1;nhr-137;sqv-5;str-257;twk-2;unc-68;igdb-2;K11B4.1;R07B1.5;igdb-1;T24B8.7;C07H6.4;F14F9.2;ttr-30;Y19D10A.1;Y48G9A.6;Y55F3AM.11;Y53C10A.15;F55G7.5
21ur-71	21ur-71	-3.88395	2.37789	0.000153934	0.0165558	0.0443472330952185 ± 0.0419542629165528	IV	5863567	5863587	-	21ur-71	nhr-22;srx-112;F21D5.5;rrf-2;sqv-5;str-257;unc-68;nhr-147;C50F7.3;nep-12;mrpl-1;F53F10.2;F55A3.2;H11E01.3;K03B4.2;neto-1;ztf-4;Y19D10A.1;Y51H7C.7;Y55F3AM.11
21ur-6033	21ur-6033	-1.33399	5.59071	0.000155803	0.0165558	0.405208675885793 ± 0.061507706695519	IV	15914360	15914380	+	21ur-6033	NA	NA
21ur-14711	21ur-14711	-1.33395	5.59071	0.000156524	0.0165558	0.405208675885793 ± 0.061507706695519	IV	15914361	15914381	+	21ur-14711	cin-4
21ur-6060	21ur-6060	1.45634	5.13467	0.000163905	0.0171729	2.72497763279187 ± 0.441933023947716	IV	16228690	16228710	-	21ur-6060	lron-1;Y45F10D.7;C55C2.3;nhr-187
21ur-6195	21ur-6195	3.04298	3.58426	0.000169885	0.0174777	9.25468155315169 ± 3.58169562179235	IV	14967616	14967636	+	21ur-6195	mig-6;smc-4;srh-245;hgap-2;F58B3.4;oac-37;M02G9.1;reps-1;srbc-2;acd-2;C49A9.6;srbc-1;K03B4.1;srbc-5;C45B11.6;bli-3;daf-18;mel-11;srv-16;K09E9.1;ZK1098.1;best-6;bbs-9;C50F7.9;duox-2;W08E12.9
21ur-14225	21ur-14225	3.04298	3.58426	0.000169961	0.0174777	9.25468155315169 ± 3.58169562179235	IV	14967617	14967637	+	21ur-14225	daf-18;lim-7;zig-5;fbxa-96;magi-1;M28.4;Y105C5B.18;bbs-9;lrr-1;W08E12.9;Y69A2AR.32
21ur-4940	21ur-4940	-1.54149	5.11773	0.000174209	0.0176274	0.344356822441421 ± 0.0829476784665732	IV	16877762	16877782	-	21ur-4940	gon-1;ZK1098.9;C31B8.1;Y82E9BL.6;F23F12.13
21ur-12184	21ur-12184	-1.54149	5.11773	0.000174592	0.0176274	0.344356822441421 ± 0.0829476784665732	IV	16877765	16877785	-	21ur-12184	lrp-1;lrp-2;srh-146;sri-6;clec-147;C50B8.4;K01A12.3;nol-14;F54E2.9
21ur-133	21ur-133	3.73153	3.01513	0.000181005	0.0181103	16.0256084950213 ± 2.79915002640375	IV	13992564	13992584	+	21ur-133	gcy-8;uev-1;set-6;F53H2.1;uso-1;scrm-3;drp-1;hum-5;kgb-1;pqn-41;sqv-1;sym-3;C33G3.5;dcn-1;B0205.6;hecd-1;wdr-12;rmh-1;C53D6.11;zip-9	drp-1;dcn-1;zip-9
21ur-1390	21ur-1390	1.13616	6.92164	0.000187684	0.0186109	2.18412979031 ± 0.383671212503482	IV	14993413	14993433	+	21ur-1390	lrp-2;nsy-1;srg-27;unc-89;C04B4.6;inft-2;W08G11.3;B0207.5;C17H12.8;F46H5.4;R11G1.1;T24E12.10;elt-3;evl-14;srm-2;srx-129;alkb-8;F09C6.3;ZK1320.11;cpna-2;B0261.5;fbxc-21;R10F2.6;mel-46
21ur-6015	21ur-6015	-1.34509	5.01726	0.000195674	0.0190833	0.392089660076083 ± 0.0228066177370734	IV	5705619	5705639	+	21ur-6015	daf-4;itx-1;smg-5;E04D5.5;Y59A8B.19;elpc-2;C16C8.4;H20J04.1;K07E3.4;pals-18;Y59A8B.26
21ur-3968	21ur-3968	1.05766	9.70921	0.000197262	0.0190833	2.0821881638835 ± 0.399674126666793	IV	14225677	14225697	-	21ur-3968	npp-3;srh-69;str-148;fbxa-100;Y60A3A.21;ugt-18;F20D12.2;Y92H12BL.5;syx-16;ZC239.13;egl-15;glt-6;srxa-18;Y43F8C.6;acr-24;R04E5.9;set-30
21ur-3129	21ur-3129	1.04968	6.93024	0.000197603	0.0190833	2.05376250690012 ± 0.244348213371735	IV	13946211	13946231	+	21ur-3129	orc-5;chil-10;T22F3.11;K10H10.12
21ur-10817	21ur-10817	-2.09096	3.38512	0.000210101	0.0201154	0.199434442724276 ± 0.114189000987105	IV	7384434	7384454	-	21ur-10817	mes-1;twk-11;ztf-15;T21C9.13;sec-10
21ur-10378	21ur-10378	1.62522	5.19079	0.000215617	0.0203671	3.09507946264716 ± 0.821194484839567	IV	5112956	5112976	+	21ur-10378	tkr-3;C48D1.1;F14E5.1;F33H1.3;row-1;sta-2;bath-43;C29F5.3;E02C12.10;lin-65
21ur-1358	21ur-1358	-1.47181	4.32547	0.000218231	0.0203671	0.349659931617441 ± 0.0164336070149172	IV	14261550	14261570	-	21ur-1358	mig-15;vps-26;pptr-2;F13B12.2;Y45F10C.1;ZK1128.1;C15H9.4;F08D12.4;tbc-16;T14E8.4;grl-10;nhr-97;scd-2;sma-1;F54D1.6;rle-1;rmd-1;C31B8.9;F35B3.7;F53H1.4
21ur-10968	21ur-10968	-1.47181	4.32547	0.000218232	0.0203671	0.349659931617441 ± 0.0164336070149172	IV	14261547	14261567	-	21ur-10968	nhr-97;epac-1;jmjd-1.1;twk-4;T01D3.6;ZK643.6;npr-19;C15B12.4;clec-3;T10E9.2
21ur-5208	21ur-5208	1.01121	6.51042	0.000236451	0.0215282	2.01157799150236 ± 0.0762199315029328	IV	14751836	14751856	+	21ur-5208	cpr-2;lpd-3;rbr-2;unc-97;sre-51;M01G5.1;ZK742.3
21ur-2923	21ur-2923	1.01121	6.51042	0.000236489	0.0215282	2.01157799150236 ± 0.0762199315029328	IV	14751839	14751859	+	21ur-2923	lin-35;ptr-22;F30F8.1;fbxa-126;CC8.2;ast-1;ZK177.1;mel-28;B0464.9;K04G2.9;ZC116.3;C05B5.16
21ur-12190	21ur-12190	1.48389	4.48	0.000240338	0.0215318	2.90247339163439 ± 0.148259862049545	IV	14686770	14686790	+	21ur-12190	cel-1;prp-8;sdc-3;tsp-14;F31C3.3;F32D8.12;F56F10.1;K07B1.4;oac-57;R03H10.2
21ur-930	21ur-930	1.48389	4.48	0.000240406	0.0215318	2.90247339163439 ± 0.148259862049545	IV	14686767	14686787	+	21ur-930	ced-11;cng-1;dim-1;sra-14;srw-99;xbx-1;srxa-14;Y67A10A.9;F10E9.1;rod-1;cpd-1;bgal-2;K02A6.3;fpn-1.1;Y57G7A.11;W09C5.12;nhr-47;srj-38;srj-45;lpr-5;ZC412.3;F56F10.1;F59A7.2;atg-3;C05E4.15
21ur-13171	21ur-13171	-1.96703	3.58481	0.000253019	0.0223583	0.234349737017142 ± 0.0519066866096677	IV	5618248	5618268	-	21ur-13171	daf-18;glr-2;grl-18;tag-89;ugt-49;C33G3.5;C33G3.6;C53B4.4;F07D3.3;F31C3.3;F41E7.2;F46A8.3;F46A8.4;H05L14.2;clec-142;K01H12.4;R10D12.8;qdpr-1;srap-1;nova-1;msrp-6;F19F10.11;tag-343;K09E2.2;Y20F4.4;C25F9.10;T07D4.5
21ur-237	21ur-237	-1.96706	3.58481	0.00025366	0.0223583	0.234349737017142 ± 0.0519066866096677	IV	5618249	5618269	-	21ur-237	age-1;twk-3;Y70C5A.2;F54G2.1;Y82E9BL.6;K11E4.6;daf-18;dyf-11;sid-3;lin-13;mrp-2;sru-3;ttn-1;tag-89;trpa-1;C33G3.5;fbxa-172;E01G6.2;F07D3.3;F10C2.5;ceh-89;F31C3.3;dep-1;qdpr-1;srap-1;srsx-33;ZK1098.6;ift-43;C45G9.10;F32B5.7;tbc-11;F36H12.17;F59B1.8;H24G06.1;K08D9.2;K09E2.2;M01E11.2;T24E12.2;Y41G9A.5;ccep-290;Y47G6A.25;mam-1;ZK616.2;tag-232
21ur-1824	21ur-1824	-1.53203	4.02589	0.000268037	0.0230022	0.326984614880189 ± 0.05504033360744	IV	4960014	4960034	-	21ur-1824	dlk-1;C36B1.9;F26H11.4;mtcu-1;nsun-5;math-3;F25E5.8;cgt-3;esyt-2;W02B3.4;cng-1;lep-2;sdc-3;sri-26;ZC376.2
21ur-13918	21ur-13918	-1.53203	4.02589	0.000268191	0.0230022	0.326984614880189 ± 0.05504033360744	IV	4960015	4960035	-	21ur-13918	cng-1;sra-33;lron-14;ZC376.2;ttr-33
21ur-3205	21ur-3205	1.10032	7.57676	0.00026925	0.0230022	2.14147844212323 ± 0.370352009423754	IV	16696520	16696540	+	21ur-3205	lev-10;pqn-15;rsd-6;stl-1;cup-16;prp-3;madf-4;hsp-12.1;gpi-1;nep-23;ZC376.1;bbs-9;mps-2;K01A2.9;T04B8.5;W03F11.4;nsun-4;Y54F10BM.12;K01A2.12
21ur-4951	21ur-4951	1.60378	4.34491	0.000276084	0.023406	3.02961386107325 ± 0.266706379738374	IV	13828642	13828662	+	21ur-4951	cut-6;nlg-1;ppm-1;pnk-4;clec-225;C34B7.1;F35E12.6;fbxa-118;T01D3.1;C06E4.6;C48E7.6;nep-6;clec-90	clec-90
21ur-670	21ur-670	2.15049	3.98212	0.000322362	0.0266964	4.61915717181211 ± 1.27177375797609	IV	16024747	16024767	-	21ur-670	bli-4;F53A2.3;fbxb-117;ZC376.6;nep-26;bath-44;C48E7.6;dod-19;srz-67;Y73B6BL.44;ceh-17;parn-1;yars-1;lst-6
21ur-8652	21ur-8652	2.15048	3.98212	0.000322619	0.0266964	4.61915717181211 ± 1.27177375797609	IV	16024744	16024764	-	21ur-8652	F31D4.2
21ur-5291	21ur-5291	1.21241	8.40038	0.000326673	0.0266964	2.3202104278057 ± 0.390211541325121	IV	15288590	15288610	+	21ur-5291	B0393.3
21ur-4668	21ur-4668	1.3996	4.77215	0.000338198	0.0266964	2.76124649292928 ± 0.208636602839865	IV	15989441	15989461	+	21ur-4668	ape-1;cpb-3;fbf-2;fce-2;C45G3.3;ins-13;ins-21;klp-13;kpc-1;nhr-136;npp-16;rom-2;sma-2;spp-15;srd-45;srg-4;taf-11.1;try-7;B0024.15;C05E7.3;C34C12.8;tag-297;drh-3;ugt-65;bed-3;F28C1.3;F28H6.6;F43G6.5;dep-1;kbrl-1;F52D10.4;K04D7.6;K08F9.3;chil-13;nduo-4;R04F11.3;lgc-15;rmh-2;pap-1;lact-8;snx-14;natc-2;mrpl-11;acdh-2;sre-52;F23C8.5;irg-7;F56H1.3;R06A10.1;R08C7.4;T28A11.4;W07B8.4;Y46D2A.1;Y92H12BL.1;C…
21ur-8287	21ur-8287	1.52502	5.82763	0.000347466	0.0266964	2.89014985374105 ± 0.809450561368223	IV	5039652	5039672	-	21ur-8287	str-14;nduo-4;F36A4.5
21ur-4579	21ur-4579	-2.49447	2.81847	0.000353568	0.0266964	0.139272614280245 ± 0.0740304611350857	IV	16659949	16659969	-	21ur-4579	flr-4;str-169;dmsr-7
21ur-2320	21ur-2320	-1.16993	5.70699	0.000354459	0.0266964	0.453650737216962 ± 0.0732751756293394	IV	6063965	6063985	-	21ur-2320	B0491.7;F41E7.1;K11E4.1;ZC434.9;T04G9.7;Y43C5A.7
21ur-6698	21ur-6698	-1.10426	6.05564	0.000356473	0.0266964	0.455001907235774 ± 0.0659814220300264	IV	15236520	15236540	-	21ur-6698	asm-1;cul-5;dgk-3;kin-1;nhr-95;xtr-1;B0464.6;rpb-6;pho-13;F22B3.5;F54B3.2;dod-22;cdc-48.3;T12A7.6;T27D12.1;Y32F6B.1;Y56A3A.31;lgc-55;C04F5.9;cls-1;smc-5;C50D2.6;ugt-37;F23C8.3;F42C5.4;F46H5.4;R01B10.3;Y39A3CL.1;dnc-6;irld-65;ZK993.2;C15B12.9;F55C9.14;T05B4.14;bbs-2;gop-1;haf-1;hsf-1;mep-1;msh-5;osm-3;sri-18;taf-6.1;tln-1;vgln-1;ugt-43;F21C3.6;T24H10.4;Y40H7A.2;Y105E8A.27;C07F11.2;F18E3.10;ifo-1;K…
21ur-861	21ur-861	-1.10427	6.05564	0.000356525	0.0266964	0.455001907235774 ± 0.0659814220300264	IV	15236517	15236537	-	21ur-861	ced-1;csp-2;hum-4;ifp-1;lbp-8;lpd-3;npp-10;oxi-1;pqn-41;rpl-11.1;snt-2;sqv-6;srh-7;srh-8;tap-1;tars-1;twk-20;pnk-4;gspd-1;leo-1;ccm-3;nrx-1;C56A3.6;cut-4;F08G12.5;uggt-2;F44E5.3;F46F2.5;F57G12.2;glo-3;K08F4.12;cpt-2;T05F1.7;T11G6.5;nra-1;Y39B6A.3;mrps-28;Y45F10D.6;sta-1;Y57G11A.2;Y57G11C.6;rpom-1;ZK507.1;ZK507.3;sor-3;spdl-1;C13A2.7;C17B7.12;D1014.2;F07G11.1;tag-340;srsx-9;F33D11.10;F35F10.5;F42C…
21ur-3176	21ur-3176	5.2086	2.50567	0.000360101	0.0266964	Inf ± NaN	IV	15623587	15623607	-	21ur-3176	frm-3;inx-3;sop-3;spe-15;sys-1;try-5;unc-38;dhc-3;C01G6.5;C14A4.13;M04B2.7;chil-23;swt-6;vps-39;Y11D7A.3;Y17G7B.18;irld-60;B0244.11;C10G11.6;pdfr-1;C54G6.2;bath-29;bath-30;F15E6.5;pgal-1;figl-1;otpl-7;T04D1.2;srab-20;zeel-1;Y108F1.5;C05C10.8	bath-29;bath-30
21ur-9436	21ur-9436	5.1244	2.45781	0.000362753	0.0266964	Inf ± NaN	IV	15816228	15816248	+	21ur-9436	ced-5;nhr-2;rha-1;srh-44;str-45;str-222;unc-32;F32H2.6;F34D10.6;F53F4.7;fbxa-102;tgn-38;T13H5.6;Y37H2C.4;atfs-1;C23G10.6;tmem-131;C29F9.2;C36C9.4;F40H6.2;F42G2.5;oef-1;zmp-2;K07A3.3;fbxb-32;R08E5.4;T05C3.2;clec-218;Y34B4A.4;Y41D4B.4;Y92H12BM.1;tmem-17;C46C11.4;C09B9.85
21ur-8076	21ur-8076	5.12443	2.45781	0.000362971	0.0266964	Inf ± NaN	IV	15816225	15816245	+	21ur-8076	coq-8;dnj-3;fbf-2;srh-44;str-262;try-5;rin-1;mans-2;klf-2;T09F3.2;tbc-9;Y105C5A.1;Y116F11B.11;C05D11.8;C23G10.6;emc-1;R08E5.4;T21D12.7;cutl-23;Y49F6C.6
21ur-1643	21ur-1643	-1.15378	5.05293	0.000374985	0.027045	0.438443206994235 ± 0.0445246897859244	IV	15967146	15967166	-	21ur-1643	ymel-1;egl-4;gld-2;hum-1;sax-3;srg-23;srg-24;C44B9.2;K07F5.16;pitp-1;Y70G10A.3;exoc-8;ZC116.3;ZK524.4;sco-1;ddo-3;F28B3.5;swip-10;nlf-1;pho-14
21ur-12921	21ur-12921	-1.1538	5.05293	0.000376741	0.027045	0.438443206994235 ± 0.0445246897859244	IV	15967147	15967167	-	21ur-12921	hst-1;hum-1;rad-54;sph-1;srg-23;srg-24;sru-26;str-61;str-261;rnf-121;C44B9.2;M03C11.3;R11H6.4;rsy-1;ZC116.3;sco-1;Y40C5A.3;ZC190.6
21ur-5511	21ur-5511	1.52811	4.52445	0.000381754	0.027045	2.82576333821848 ± 0.389265613322984	IV	14493923	14493943	-	21ur-5511	inx-10;lat-2;sra-38;srd-5;sru-44;srw-51;B0334.5;C07A9.9;C23H4.4;gadr-2;gale-1;F01G10.9;sqst-1;W02H3.1;ZK1086.3;hosl-1;sre-55;fbxb-111;F22E5.1;F40H6.5;gadr-3;cyp-33C8;Y27F2A.6;ttc-37;Y50D7A.3;W03G9.8
21ur-6082	21ur-6082	1.52809	4.52445	0.000382222	0.027045	2.82576333821848 ± 0.389265613322984	IV	14493926	14493946	-	21ur-6082	cdf-1;oma-1;sri-33;srx-134;top-1;glb-8;cfim-2;swsn-2.2;C50E3.11;ets-6;gadr-3;K03B4.2;R151.2;trap-2;Y97E10B.1;C47E12.14;F41E6.15;Y71F9AM.8;D1046.18
21ur-9428	21ur-9428	1.52809	4.52445	0.0003823	0.027045	2.82576333821848 ± 0.389265613322984	IV	14493931	14493951	+	21ur-9428	pqn-85;C34C12.7;F25B3.2;acdh-9;rfip-1;R05D3.9;Y48G1C.5;K09F5.6
21ur-15338	21ur-15338	1.52809	4.52445	0.000382322	0.027045	2.82576333821848 ± 0.389265613322984	IV	14493922	14493942	-	21ur-15338	lat-2;pmp-5;ptr-10;sra-38;sru-44;srw-112;tag-4;tre-4;vars-1;B0334.5;hasp-1;C23H4.4;F01G10.9;F11F1.4;usp-33;sqst-1;slc-17.4;W02H3.1;gcl-1;lgc-55;irld-61;ZK1086.3;cpna-2;C35E7.5;F02C9.2;F40H6.5;cyp-25A6;ger-1;R13A5.11;T28C12.2;Y50D7A.3;F11F1.8;W03G9.8
21ur-9109	21ur-9109	1.66786	4.49851	0.000396857	0.0276539	3.07645503995511 ± 0.356312766680027	IV	14889855	14889875	+	21ur-9109	baf-1;sra-36;sul-1;unc-75;glb-3;igdb-2;C50B6.3;F25F2.1;bath-45;F32H5.4;C18F10.2;hecd-1;F39C12.1;T04D1.2;Y18H1A.15;atm-1;exp-2;let-4;lin-3;nhr-94;rsd-6;tph-1;tsp-11;frpr-5;fecl-1;R06F6.8;fbxa-104;Y69H2.7;cpna-2;viln-1;C18E3.1;C33E10.6;ipla-4;F22F7.2;hda-6;T28D9.9;Y71G12B.17;ZC581.9;ZK354.2;best-24
21ur-7052	21ur-7052	1.66783	4.49851	0.000397656	0.0276539	3.07645503995511 ± 0.356312766680027	IV	14889854	14889874	+	21ur-7052	atm-1;bli-4;bra-1;ceh-23;col-76;dhs-4;dur-1;exp-2;gei-4;grd-10;hcp-6;let-4;lin-3;mrp-2;ncx-1;rsd-6;srw-107;uev-3;unc-68;unc-82;vit-6;D2005.4;chw-1;F35G12.7;F38H4.4;F56A12.2;fecl-1;R03G8.4;T05G5.4;fbxa-104;T07D4.2;mlt-11;Y39B6A.18;Y48A6C.4;arrd-16;nsun-5;Y69H2.7;rbm-12;B0207.5;math-4;srxa-5;viln-1;C18F10.2;C33E10.6;ipla-4;F22F7.2;hda-6;athp-2;R05F9.7;T24E12.10;T28D9.9;Y37F4.1;Y71G12B.17;Y73C8C.3;Z…
21ur-1520	21ur-1520	-1.85361	3.36039	0.000400517	0.0276539	0.252996712951666 ± 0.0533117940641709	IV	6471844	6471864	+	21ur-1520	Y54F10AR.2
21ur-7530	21ur-7530	1.11931	7.40742	0.000402701	0.0276539	2.17469194480317 ± 0.448532418713232	IV	16896561	16896581	-	21ur-7530	air-2;col-10;col-41;col-44;col-53;col-65;col-144;col-145;col-159;col-160;col-174;cul-5;dpy-13;dpy-14;dpy-22;emb-9;fbl-1;let-2;lon-3;mcm-4;mtm-3;rol-6;smc-3;sos-1;twk-11;unc-68;C14H10.3;hgap-2;tag-314;F16A11.1;F18A11.2;F19H6.6;rbpl-1;F49C5.4;F53B6.7;H12D21.2;T04F3.1;T08G11.1;T20G5.9;W06D11.3;W09G3.6;ceh-100;elpc-2;F07F6.4;M4.1;T22B11.4;F27E5.7
21ur-14020	21ur-14020	-1.5715	4.74079	0.000405763	0.0276539	0.315243481005716 ± 0.129023525169998	IV	15265720	15265740	+	21ur-14020	eat-3;let-363;nhr-107;srx-78;C29A12.6;cyp-37B1;T16A9.5;F15B10.3;F17A9.2;acds-10;Y18H1A.9;fipr-18;fipr-19;Y54G2A.76
21ur-3477	21ur-3477	-1.5715	4.74079	0.000405869	0.0276539	0.315243481005716 ± 0.129023525169998	IV	15265715	15265735	+	21ur-3477	cyn-13;gon-2;ifa-4;lec-3;sel-2;C09F9.2;npr-4;F28B4.3;T19E7.6
21ur-1213	21ur-1213	1.14912	7.1096	0.000412752	0.0279402	2.22867135905729 ± 0.37012100481211	IV	14538688	14538708	-	21ur-1213	acr-23;mbk-2;rde-1;elpc-2
21ur-6394	21ur-6394	-1.12712	5.28989	0.000417688	0.0279402	0.443905186354412 ± 0.0644867466801423	IV	6639355	6639375	-	21ur-6394	lin-12;mex-6;srh-218;skpo-1;W06D11.2;Y47H9C.1;B0207.1;tyr-1;T13F3.8
21ur-10861	21ur-10861	1.21707	5.69222	0.00042265	0.0279402	2.3530111899492 ± 0.398774617270395	IV	14270313	14270333	+	21ur-10861	let-413;nmy-2;rad-50;smp-2;srh-201;srh-203;ubc-9;C14A6.3;C14A6.6;set-6;nhr-167;D1086.3;fbxa-95;exo-1;T09F3.4;sql-1;B0507.7;B0524.4;eri-6;C50E3.12;E02C12.6;F18G5.6;F28E10.1;F40H3.3;F53A10.2;K09F6.3;T20D4.10;F17B5.6	C50E3.12
21ur-668	21ur-668	1.12172	7.05483	0.000437269	0.0285976	2.18095519401997 ± 0.392370232670949	IV	16358559	16358579	+	21ur-668	dhc-1;ego-2;goa-1;lpr-1;lov-1;odr-1;pmp-4;sru-7;hgap-2;F19H8.2;F20G2.5;F28H7.8;glo-3;irld-39;K04G11.3;R10D12.8;T20F10.5;mrpl-50;Y46G5A.29;sta-1;syx-6;C36E6.2;C45E1.4;bcl-11;F19C7.2;cla-1;H43E16.1;K02F6.3;R05D3.2;T19D12.1;set-30;C18D11.7;C53D6.11;M03A1.8	dhc-1
21ur-12908	21ur-12908	1.12172	7.05483	0.000437745	0.0285976	2.18095519401997 ± 0.392370232670949	IV	16358558	16358578	+	21ur-12908	cdh-9;cuc-1;dhc-1;egl-9;gcy-22;gei-8;gei-13;goa-1;gst-42;lpr-1;lov-1;odr-1;pmp-4;szy-20;abu-13;pqn-85;ptr-13;sru-7;srx-131;sys-1;vps-34;chd-7;C03E10.3;chil-6;hgap-2;F19H8.2;F20G2.5;bed-3;F28H7.8;hpo-31;K03H1.5;K04G11.3;K04H4.2;R03C1.1;mask-1;mrpl-50;T23B5.3;W03C9.1;Y56A3A.2;Y75B8A.8;chil-9;C12D12.1;syx-6;acdh-2;C45E1.4;C46H11.10;clec-141;farl-11;F22E5.2;cla-1;comt-1;F56A4.4;H43E16.1;pqn-52;npp-21…
21ur-1312	21ur-1312	-1.06214	6.24177	0.000449612	0.0292011	0.466881851052121 ± 0.102600037382197	IV	16550925	16550945	+	21ur-1312	unc-97;F54C8.4;tftc-3;trpp-12;sre-34;Y119C1B.12;C41G7.8;dys-1;tsp-6;C48D1.1;dpt-1;glb-15;pde-12;inos-1;srz-85;F55C12.6;K04A8.1
21ur-1589	21ur-1589	1.39545	8.40484	0.000466171	0.0299878	2.63274168524559 ± 0.831420977332027	IV	16166988	16167008	-	21ur-1589	ego-1;fbxa-158
21ur-4893	21ur-4893	1.03487	6.28492	0.000477925	0.0299878	2.0731233664911 ± 0.228653214340039	IV	15332425	15332445	-	21ur-4893	NA	NA
21ur-8605	21ur-8605	1.77232	4.21151	0.000488429	0.0300238	3.34723353826207 ± 0.286598307407419	IV	15946626	15946646	-	21ur-8605	cyp-29A4;C04A11.1;best-14;F54C8.7;F58D2.2;arrd-17;T15D6.8;C18C4.7;C33F10.8;C46A5.4;uri-1;F52G3.4;F54E7.6;K07E3.4;T10H10.2;aly-3;cyb-3;cyn-12;dys-1;frm-5.1;gap-2;gst-6;laf-1;lrp-2;prx-3;rpl-33;snf-6;srh-89;sym-4;dmd-6;B0019.2;usp-50;E03H4.3;F01G10.10;F49B2.6;F56H6.1;T13F3.4;agxt-1;inpp-1;W02B12.4;Y11D7A.7;Y60A3A.16;tag-349;C05D9.7;F09E10.7;T04C4.1;bcas-2;tat-4;Y37B11A.2;fbxa-25;T09E11.12;C13C4.8;F…
21ur-4229	21ur-4229	1.7723	4.21151	0.000488929	0.0300238	3.34723353826207 ± 0.286598307407419	IV	15946629	15946649	-	21ur-4229	asm-1;bbs-2;ceh-32;cyb-3;dys-1;lin-45;ncx-3;pen-2;skr-19;srd-55;srh-89;srv-24;pptr-2;C25F9.5;C35C5.8;C47E8.4;C49C3.9;F22B5.6;F47B10.8;M04C3.2;lgc-16;T08G11.3;T14G10.5;inpp-1;T28B8.3;nduf-7;nhr-234;Y43F8A.5;Y43F8B.11;tbc-20;tag-349;srbc-43;srbc-44;bath-24;B0416.2;C09F5.1;fbxc-53;cutl-28;bath-2;myo-5;atg-2;T04C4.1;T05H4.7;T14B4.8;tat-4;gpa-18;W05G11.4;srsx-6;Y60A3A.24;pals-15;irld-51;R04A9.9
21ur-9479	21ur-9479	1.62155	4.26625	0.000497321	0.0300238	3.08846564761366 ± 0.382098845198163	IV	15103642	15103662	+	21ur-9479	sra-32;tsp-3;ver-3
21ur-2119	21ur-2119	-2.48369	2.82735	0.000497723	0.0300238	0.17241553447571 ± 0.0277223019956127	IV	6183393	6183413	-	21ur-2119	glp-1;pqn-85;srj-26;dhc-3;C23H4.6;fbxa-188;F07E5.4
21ur-3885	21ur-3885	-1.04278	6.33374	0.000499219	0.0300238	0.493068723684893 ± 0.0469368066504398	IV	15360129	15360149	-	21ur-3885	acr-7;emo-1;feh-1;fkb-7;hsp-1;pgp-12;rrf-2;F49C12.7;ZK1321.4;C02F5.3;fbxa-164;bath-31;fbxa-54;T19C3.5;fbxa-13;Y73C8C.10;cin-4
21ur-13542	21ur-13542	-1.04278	6.33374	0.000499638	0.0300238	0.493068723684893 ± 0.0469368066504398	IV	15360132	15360152	-	21ur-13542	kqt-1;slo-1;slo-2;srj-25;heh-1;R10E11.6;T05B9.1;mlc-5;jun-1;jmjd-3.1;T25D10.1;Y110A7A.9
21ur-7789	21ur-7789	1.27681	7.09187	0.000502428	0.0300238	2.43015902086713 ± 0.509583363157756	IV	13830207	13830227	-	21ur-7789	srh-71;unc-22;C39E9.7;R08D7.5;Y53F4B.10;C23H3.9;mms-19;skpo-3;F42H10.2;timp-1;fbxb-83
21ur-1148	21ur-1148	1.27681	7.09187	0.000502829	0.0300238	2.43015902086713 ± 0.509583363157756	IV	13830206	13830226	-	21ur-1148	cul-3;eat-16;fmo-3;let-19;lst-2;mau-2;rab-8;ran-4;sec-24.2;srh-21;sri-18;ubl-5;vps-26;mdt-21;hinf-1;Y38F1A.8;ttr-26;parn-2;Y105C5A.15;glb-9;C48E7.1;pole-2;kvs-3;F54A3.2;cct-3;T10B5.10;dmsr-13;siah-1;Y41D4A.6;K04C2.7;srb-2;tmd-2;Y53F4B.10;mrps-9;skpo-3;timp-1
21ur-13928	21ur-13928	1.29452	5.14626	0.000517343	0.030123	2.44398916512776 ± 0.20284818281176	IV	13707553	13707573	+	21ur-13928	che-7;cyl-1;ketn-1;rnr-1;srw-103;ril-2;arrd-9;F36H2.3;M110.7;oac-56;ZK792.7;math-25;D1014.5;srt-35;abts-3;Y22D7AL.15;Y40A1A.2;M02G9.4;F52D2.12
21ur-5826	21ur-5826	1.29452	5.14626	0.000518215	0.030123	2.44398916512776 ± 0.20284818281176	IV	13707549	13707569	+	21ur-5826	dic-1;gcy-33;him-4;hmr-1;hog-1;let-19;nhr-68;ocr-4;srh-49;sru-23;str-76;twk-2;C32H11.9;dod-21;drh-3;hgap-2;glna-3;F54D1.6;R06A4.2;chil-21;pde-12;T03D8.6;qdpr-1;acl-2;T19A6.1;T28C6.5;Y6D1A.1;Y54E5B.2;faah-4;ZC302.3;atg-4.2;ZK896.4;ZK896.5;C28H8.2;chtl-1;ubxn-3;F53B1.4;R02F2.7;R11G1.6;tmc-1;str-265;fahd-1;ZK973.11
21ur-12846	21ur-12846	1.29451	5.14626	0.000518674	0.030123	2.44398916512776 ± 0.20284818281176	IV	13707554	13707574	+	21ur-12846	chs-2;ocr-4;rnr-1;srw-103;unc-68;ver-3;clec-48;T25B9.6;jmjd-2;ZK1067.4;tbc-6;D1014.5;EEED8.15;srt-35;abts-3;F59B1.6;K10B3.5;Y22D7AL.15;Y71G12B.6;srbc-60;C29E4.15;Y34F4.6;F52D2.12
21ur-1574	21ur-1574	1.24571	5.86962	0.000518832	0.030123	2.34947031508541 ± 0.518968872285964	IV	15548953	15548973	-	21ur-1574	asp-1;grd-14;let-363;nas-17;pyr-1;srv-13;B0024.15;pfas-1;F18C12.3;aptf-4;scl-18;Y57G11B.5;ZK930.7;srbc-23;F59E12.9;helq-1;Y119D3B.14;irld-63;Y26D4A.21;K12B6.4;M70.4
21ur-5873	21ur-5873	1.29451	5.14626	0.000519752	0.030123	2.44398916512776 ± 0.20284818281176	IV	13707554	13707574	-	21ur-5873	srj-14;gipc-2
21ur-9242	21ur-9242	1.29451	5.14626	0.000520765	0.030123	2.44398916512776 ± 0.20284818281176	IV	13707555	13707575	-	21ur-9242	ced-12;ceh-13;pros-1;chd-3;ckb-1;cle-1;dis-3;dpy-21;dpy-26;dyf-2;efk-1;egl-19;fbl-1;hmg-1.2;let-268;let-630;lrp-1;ltd-1;mig-1;nmr-2;npp-3;npp-14;oxi-1;pmp-1;ppw-1;prp-21;ptp-2;ptr-22;rbg-2;rsd-6;sec-5;slt-1;smu-2;snt-3;spr-2;srh-34;srv-5;srw-8;taf-1;srgp-1;ttn-1;zhit-3;unc-129;xbx-1;zyg-9;rfp-1;AC8.3;B0001.2;tads-1;C01F6.2;cnnm-4;glb-4;ccdc-55;C17E4.1;C36B1.9;C38D9.2;ddo-1;C47E8.3;C49A1.1;C54G4.9…
21ur-3753	21ur-3753	-1.2346	5.19334	0.000540113	0.030869	0.427303976236061 ± 0.0219391604993151	IV	5053075	5053095	+	21ur-3753	acy-1;atl-1;cyp-13A7;chs-2;cpi-1;col-167;dnj-8;fkb-7;hum-7;ida-1;inx-1;kin-15;kup-1;lim-4;lpd-3;mog-5;nas-16;dcap-2;nhr-43;nhr-115;nlr-1;nmy-2;npp-6;pan-1;plc-1;ptrn-1;pqn-41;prp-21;swsn-1;ptr-13;ptr-23;rde-1;rol-3;rrf-2;sma-9;srh-7;srh-118;srh-120;sru-11;sru-36;srw-85;srx-129;sym-1;trt-1;twk-13;unc-31;unc-82;xtr-2;B0198.2;C01G6.5;lmtr-3;set-3;C09G1.2;C11H1.5;C13C4.6;C14C10.2;C14C10.5;nrx-1;C34F6…
21ur-7440	21ur-7440	-1.17295	5.91043	0.000540161	0.030869	0.450462407194868 ± 0.0672095105284421	IV	16154887	16154907	-	21ur-7440	C50A2.3
21ur-12417	21ur-12417	-1.23459	5.19334	0.000542	0.030869	0.427303976236061 ± 0.0219391604993151	IV	5053078	5053098	+	21ur-12417	W02B12.12;F31F7.1
21ur-1075	21ur-1075	1.43498	4.89004	0.000560114	0.0317108	2.66904023858516 ± 0.468262298385605	IV	15706678	15706698	-	21ur-1075	K09E3.5
21ur-9850	21ur-9850	2.90132	3.05481	0.000563684	0.0317108	7.93479080173298 ± 1.06706700844304	IV	15960290	15960310	+	21ur-9850	meg-3;K06A4.2
21ur-628	21ur-628	1.06721	9.59297	0.000584545	0.0326229	2.09480681126178 ± 0.518406048214229	IV	14690413	14690433	-	21ur-628	nrf-6;tag-153;unc-49;chil-27;cpsf-3;W08F4.7;Y47G6A.5;otub-2;Y82E9BR.3;cul-6;lad-2;mua-3;unc-52;C45B11.2;F01D5.6;R08A2.2;hrde-2;rga-1;tat-1;abhd-3.1;cyp-31A5;gdh-1;hpo-28;F47E1.4;egas-4;glf-1;R08C7.8;ZK686.2;Y60A3A.25;F26G1.9	gdh-1
21ur-12780	21ur-12780	-1.38164	4.71129	0.000599687	0.0329151	0.366454102292733 ± 0.0606837251916818	IV	5721863	5721883	+	21ur-12780	fkh-5;haf-9;ima-3;F07A11.4;T21C9.4;Y6B3B.4;Y6G8.2;gcn-2;ubr-1;F48E8.4;zip-4
21ur-6239	21ur-6239	-1.38166	4.71129	0.000600793	0.0329151	0.366454102292733 ± 0.0606837251916818	IV	5721868	5721888	+	21ur-6239	T24H10.5;mmcm-1;math-2;math-4;rig-6;F18E3.10;F47E1.4;sdz-23
21ur-9111	21ur-9111	-1.85565	3.69206	0.000608546	0.0329151	0.265820799906781 ± 0.0155791083151751	IV	16182183	16182203	-	21ur-9111	nas-36;Y39A1A.21;ceh-13;dnj-28;lst-2;taf-5;rhgf-1;gasr-8;srz-16;F20C5.5;M01F1.3;B0261.5;nra-4;C05C8.5;C14C6.6;tiar-1;T07A9.10;fbxa-51;T21G5.1;lfi-1;ZK488.5
21ur-2161	21ur-2161	-1.1382	5.28816	0.000609481	0.0329151	0.45356224798521 ± 0.0207014442066402	IV	13610116	13610136	-	21ur-2161	cdh-3;cnx-1;daf-5;gcy-7;gst-6;pat-12;pqn-84;pars-1;ttn-1;kcc-1;clec-162;tbc-1;F49B2.3;F58B3.6;mcrs-1;tasp-1;arrd-11;fbxa-209;Y116A8B.1;slc-17.8;F33G12.6;R02C2.6;camt-1;fbxb-10
21ur-7561	21ur-7561	-1.85566	3.69206	0.000609676	0.0329151	0.265820799906781 ± 0.0155791083151751	IV	16182182	16182202	-	21ur-7561	dhs-22;egl-4;lec-2;msh-5;npp-14;rnf-1;rnp-6;srx-129;twk-33;trr-1;C01A2.1;C36E8.1;lgc-43;skih-2;mon-2;R10E4.7;coa-6;acdh-12;F19B10.5;F35A5.1;F54G2.1;abts-4;T02H6.1;math-38;ZK121.2;ceh-13;che-3;iglr-1;F22D6.9;F53B7.4;mecr-1;rha-2;C25H3.9;ncam-1;T07A9.10
21ur-5706	21ur-5706	1.47086	5.3163	0.000613491	0.0329151	2.74468985710201 ± 0.745194181851362	IV	15794793	15794813	+	21ur-5706	F36F12.3;set-19
21ur-3696	21ur-3696	-1.2819	5.2054	0.000630483	0.0336642	0.427014233774224 ± 0.0908218353112696	IV	5212725	5212745	+	21ur-3696	ceh-40;clp-4;fkb-8;gln-1;gln-5;lin-49;rde-1;alg-4;xnp-1;tag-325;C47F8.3;F14H8.4;ash-2;Y38E10A.3;afmd-2;Y116F11A.1;efr-3;F22H10.1;hmbx-1;F59B1.10;fbxc-24;Y110A2AL.1;set-18;bus-18;folt-3;hch-1;rme-6;ufd-3;R05D11.9;clec-29;irld-56;ZC376.6;ZK849.6;sgca-1;fpn-1.2;lfi-1;ZK6.8;tag-241
21ur-4537	21ur-4537	1.06223	6.56411	0.000686872	0.0357615	2.10629452776823 ± 0.237066063711862	IV	13801050	13801070	-	21ur-4537	myrf-2;copb-2;agl-1;cox-6B;K10C2.14;F23H12.3;F44A2.7
21ur-7534	21ur-7534	1.06223	6.56411	0.000687231	0.0357615	2.10629452776823 ± 0.237066063711862	IV	13801051	13801071	-	21ur-7534	aqp-7;fmo-1;ptr-9;rpm-1;srw-33;str-108;tsp-14;F37B12.3;F38B7.3;C08D8.1;erp-44.1;fbxa-38;F44A2.7
21ur-4783	21ur-4783	1.24965	5.66451	0.000694026	0.0357615	2.37769365162315 ± 0.101548253783669	IV	14393942	14393962	+	21ur-4783	alg-1;spp-8;tps-2;cyp-25A1;cyp-25A2;chil-12;rhy-1;cyp-25A3;C39D10.7;F56F10.2;cyp-25A6;ZC317.2
21ur-2173	21ur-2173	1.24965	5.66451	0.000695181	0.0357615	2.37769365162315 ± 0.101548253783669	IV	14393939	14393959	+	21ur-2173	gcy-4;ptr-19;ugt-15;irld-34;fbxl-1;F21A3.11;sma-5;srg-69;srw-98;tsp-17;cdk-12;C06C3.4;C34C6.4;arrd-10;T04F3.1;oac-46;srbc-21;srbc-22;Y38C1BA.1
21ur-5677	21ur-5677	-1.66596	4.51543	0.000697823	0.0357615	0.313987244170363 ± 0.0494413286003779	IV	17185050	17185070	+	21ur-5677	phf-34;nkat-3
21ur-11397	21ur-11397	1.25831	5.75318	0.000698743	0.0357615	2.37144157520104 ± 0.455470476883687	IV	13719914	13719934	-	21ur-11397	apd-3;bbs-2;ced-7;csq-1;dao-4;dis-3;dpf-3;ehn-3;fkh-5;kin-30;let-23;let-381;mig-15;mog-5;dcap-2;nhr-34;nhr-134;nhr-136;tank-1;ras-1;skr-20;spc-1;taf-1;tkr-3;ugt-1;B0001.2;C28A5.6;tbc-19;F07A5.2;F10G8.8;oac-15;F15D4.4;F23B2.10;glb-15;F52F12.9;F54B3.1;F54D1.1;xdh-1;F57G12.1;F59D12.3;K02C4.3;cbp-2;lgc-49;pitp-1;M7.7;dlc-2;R03G8.1;chil-19;chil-21;mask-1;eea-1;srab-17;rbm-22;T19B10.5;chil-26;mlt-11;tt…
21ur-10993	21ur-10993	1.48397	5.01671	0.000710804	0.0360465	2.81224507180392 ± 0.648154721354534	IV	6042855	6042875	+	21ur-10993	daf-11;dhc-1;dnj-8;ina-1;myo-1;nmy-1;orc-2;stam-1;rbg-1;sru-15;mrck-1;dgk-4;ubc-17;tln-1;unc-104;vha-12;zyg-9;chd-7;C15H7.3;C18E9.8;C27D8.3;C32H11.5;C50F4.4;din-1;mrpl-13;F25H2.6;F26A3.7;F26E4.7;F33H1.4;F39H11.1;F40F11.4;H37A05.2;K01D12.6;R08D7.7;R10E4.7;T03D8.6;T06D8.2;hpo-5;alh-13;nmy-3;Y32B12B.2;Y49E10.21;Y51A2B.6;Y54E5B.2;ZK858.2;B0507.6;B0507.8;B0563.6;C09E7.8;math-7;C38C3.6;F01G12.1;ugt-41;…
21ur-2518	21ur-2518	5.24259	2.51364	0.000728974	0.0364412	Inf ± NaN	IV	14366277	14366297	+	21ur-2518	scl-18;srz-23;Y102A11A.9
21ur-4189	21ur-4189	1.08118	6.01689	0.0007325	0.0364412	2.12570981238459 ± 0.252755353233534	IV	4877847	4877867	-	21ur-4189	acs-10;irld-2;F59F5.3;W01B6.6;C24H12.4;C25E10.4;C48E7.6
21ur-11972	21ur-11972	1.08118	6.01689	0.000732662	0.0364412	2.12570981238459 ± 0.252755353233534	IV	4877848	4877868	-	21ur-11972	nhr-137;pas-6;ppw-2;rme-6;tmbi-4;arrd-5;C25E10.4;F55F10.1;M116.5;Y73E7A.2
21ur-3882	21ur-3882	-1.16459	5.04951	0.000734992	0.0364412	0.446833718461605 ± 0.0149457034546395	IV	4961787	4961807	-	21ur-3882	sre-1
21ur-162	21ur-162	1.20439	5.9723	0.000746413	0.0364832	2.30352878486029 ± 0.537923460317398	IV	13621601	13621621	-	21ur-162	aco-1;gcy-36;gld-2;glt-3;nob-1;sop-2;srh-31;sru-27;srx-73;str-148;str-199;tag-353;aptf-4;R09A8.1;T16G12.6;Y48C3A.5;srab-1;C44E12.1;C48E7.1;sre-51;cutl-29;F35D2.1;T07D1.2;W08A12.3;mppa-1;syd-9;pitp-1;F46G11.2;W03F11.5
21ur-1171	21ur-1171	-2.86517	2.57881	0.000753189	0.0364832	0.0983373501930122 ± 0.0506045757275803	IV	16747881	16747901	+	21ur-1171	unc-44;clec-162;F30F8.10;dmsr-4;ugt-38;F53B1.8;frpr-16;fkh-8;ZC132.3
21ur-6718	21ur-6718	-1.04811	5.60745	0.000756098	0.0364832	0.485577586110494 ± 0.0602159900083996	IV	16870677	16870697	+	21ur-6718	adr-2;apl-1;atf-7;ced-5;dhs-20;dig-1;dsl-7;elo-4;gcy-9;gdi-1;gop-1;gpa-13;hcp-2;hot-4;let-418;let-805;msh-2;nhr-89;nnt-1;nrf-6;pqe-1;pqn-21;pqn-24;trpl-5;rom-2;rpt-1;sbp-1;F56B3.4;smg-2;snt-3;srg-47;srh-7;srj-5;sru-19;srv-3;srw-33;srw-67;srw-101;srx-92;syx-2;taf-2;tbx-39;tfg-1;tra-2;unc-5;unc-36;ver-3;vha-3;wve-1;zmp-1;pbrm-1;crm-1;BE10.1;C05C10.2;C07A4.2;C17E4.2;C23H4.2;C25G4.7;C33D9.6;C36H8.1;C…
21ur-296	21ur-296	1.14538	6.14909	0.00075903	0.0364832	2.20114164597105 ± 0.474733521396817	IV	13863445	13863465	-	21ur-296	ptr-2;srw-103;F38B2.3;R12H7.4;bbs-9;npr-26;C13A2.4;C17B7.5;F38E9.1;gbb-1
21ur-4772	21ur-4772	1.05202	8.37871	0.000760973	0.0364832	2.06906927901393 ± 0.499236118450911	IV	14714760	14714780	-	21ur-4772	cel-1;cul-4;dhs-20;msh-2;ret-1;vps-34;wrn-1;jud-4;F55F3.4;Y111B2A.3;arle-14;F54D12.2;nath-10;F58F9.6;R01H2.4;vamp-7;ZK250.14
21ur-739	21ur-739	1.05201	8.37871	0.000761889	0.0364832	2.06906927901393 ± 0.499236118450911	IV	14714756	14714776	-	21ur-739	egl-44;pes-10;wee-1.3;mboa-1;acs-12;F54C9.9;F58E6.6;F58H1.7;F27C1.2;cpt-4;T03G6.3;Y54F10BM.1;sek-3;F17B5.10;egl-27;pes-7;srh-173;srh-244;srh-247;rhgf-1;Y40C5A.4;K03H1.13
21ur-10033	21ur-10033	1.05201	8.37871	0.000762121	0.0364832	2.06906927901393 ± 0.499236118450911	IV	14714755	14714775	-	21ur-10033	nhr-101;pes-7;srh-237;sri-12;lips-17;F36H2.6;F15H10.12
21ur-2997	21ur-2997	1.26822	5.51619	0.000787798	0.0371747	2.38035728977462 ± 0.492799074683196	IV	16627585	16627605	+	21ur-2997	arl-3;arl-8;ced-3;daf-4;daz-1;dpy-23;ego-2;fat-6;flp-2;frm-1;frm-8;gna-1;jac-1;lin-7;ncx-1;nhl-1;nhr-88;pdk-1;ran-5;rbg-2;ret-1;rsp-1;rsp-7;san-1;snr-4;sqt-2;srw-133;srx-8;srx-44;trr-1;B0564.6;B0564.9;C09G9.1;lid-1;irld-24;C36E8.1;C50H2.5;D2030.2;F11E6.9;F13B12.1;acp-3;F23B2.10;F30F8.1;F53H2.3;F55H2.5;H06A10.1;K07A1.13;M28.8;R07D5.2;pelo-1;T01D3.1;T02E1.2;T03F7.5;T05F1.2;W04A8.1;W04G5.5;prmt-7;Y1…
21ur-2463	21ur-2463	1.26821	5.51619	0.000789099	0.0371747	2.38035728977462 ± 0.492799074683196	IV	16627582	16627602	+	21ur-2463	csp-3;dys-1;exc-7;frm-8;grl-3;haf-1;mec-1;nhr-48;nnt-1;myrf-1;pri-2;qua-1;str-25;zmp-1;C01G6.5;C05C12.6;bud-31;F10A3.4;F22B8.3;F40D4.12;clec-24;F54B11.5;srz-42;K03A11.1;M176.4;T04F3.1;Y42A5A.1;Y51H4A.7;Y56A3A.2;fbxa-30;ZC373.5;C14F11.4;C23G10.6;efr-3;cyp-33C1;del-7;nhr-36;F41G3.3;F45F2.11;lmd-3;H20J04.1;lipl-3;T07F8.1;T19B4.5;F41G3.19;Y43F8B.15;ZK250.13
21ur-257	21ur-257	1.19184	5.54965	0.000789954	0.0371747	2.27139139589678 ± 0.170913555464589	IV	15666938	15666958	+	21ur-257	daf-28;gly-3;nhl-3;ocr-1;pqn-42;ptr-18;rab-18;sqv-2;srh-78;srh-82;srh-102;srh-146;srh-211;ula-1;ugt-60;oac-14;F28D9.4;piki-1;spat-1;ric-7;F59B2.9;nhr-207;R10E8.6;R17.3;chaf-1;chhy-1;jmjd-2;ntl-11;Y106G6H.9;F26A1.3;F46F5.11;sec-3;F55F10.1;F58F12.2;M01B12.4;M70.5;W07E6.2;unc-132;ZC155.2;ZC581.9;ZK105.3;pudl-1;pudl-2;ZC449.7;F26D11.13;Y48G1C.13;F23C8.14;mtm-5;smp-1;C08B11.8;bcl-11;nhr-221;usp-5;ZK41…
21ur-14771	21ur-14771	1.08469	6.90168	0.000814066	0.0373919	2.12942864496343 ± 0.327808109479608	IV	15616409	15616429	-	21ur-14771	nhx-1;san-1;exos-4.1;C01F1.3;F40G9.12;R05G9R.1;hrpu-2;tin-9.2
21ur-12506	21ur-12506	1.08469	6.90168	0.000814294	0.0373919	2.12942864496343 ± 0.327808109479608	IV	15616412	15616432	-	21ur-12506	spg-7;unc-11;exos-4.1;lgc-21;srap-1;C02F5.5;tmem-131;aagr-1;tin-9.2
21ur-4960	21ur-4960	1.08469	6.90168	0.000814492	0.0373919	2.12942864496343 ± 0.327808109479608	IV	15616413	15616433	-	21ur-4960	acr-16;gbh-2;sra-2;exos-4.1;rpn-6.2;H06A10.1;aagr-1;F36H9.2;Y67D8C.3;tin-9.2	rpn-6.2
21ur-7640	21ur-7640	1.08469	6.90168	0.00081477	0.0373919	2.12942864496343 ± 0.327808109479608	IV	15616417	15616437	-	21ur-7640	cka-2;dcap-2;pgp-9;sph-1;srw-95;trxr-2;C25E10.10;C33E10.8;nhr-139;hpo-27;F35A5.4;pho-6
21ur-5836	21ur-5836	-1.17097	5.34833	0.000856064	0.0389649	0.437249351521485 ± 0.0691156287324391	IV	6052507	6052527	-	21ur-5836	cdh-7;gcy-23;nas-37;srj-38;ttn-1;C05C9.3;C15C8.6;F57C7.4;R03G8.1;Y113G7B.15;W03F8.6;Y110A7A.9
21ur-1528	21ur-1528	1.22565	5.58048	0.000918205	0.0416228	2.33327584732395 ± 0.526891720048646	IV	15629441	15629461	-	21ur-1528	let-526;pfn-2;rpl-42;sph-1;sra-13;srh-235;vav-1;C27B7.9;C38C6.5;phf-34;Y17G7B.8;Y47H9C.8;C03G6.17;srab-3;C09E7.8;F44A2.3;K06H6.1;T28A11.17;Y48G1BR.1;rbm-42;B0403.6
21ur-1847	21ur-1847	1.14164	7.06608	0.000943973	0.0424851	2.22467754435725 ± 0.33663809657144	IV	13914730	13914750	-	21ur-1847	bli-4;qars-1;fkh-5;rad-50;sec-23;str-30;F14B6.6;degt-1;pole-1;piit-1;F44E5.3;madd-4;clec-142;K01D12.5;R01E6.2;T27E7.4;egas-3;gad-3;clec-89;fln-2;F48E8.3;T19C3.2;nhr-228;pqn-73;nuo-2
21ur-1181	21ur-1181	1.74287	3.826	0.000949036	0.0424851	3.56599720813189 ± 0.10891415066202	IV	13627029	13627049	-	21ur-1181	F10C2.5;aph-1;col-118;kin-4;nmr-1;pin-2;kcc-1;evl-18;F56A8.3;fbxa-108;ZC84.7;cutl-14;C09E7.4;C16D9.8;T04G9.6;T22B2.3;Y18H1A.4;Y45G5AL.1;C30G7.2
21ur-528	21ur-528	1.03535	7.5818	0.000953826	0.0424851	2.0470411136231 ± 0.483876715077724	IV	15991855	15991875	-	21ur-528	cap-2;pqn-62;pqn-88;pyr-1;sra-8;vps-35;wrt-8;chd-7;clec-57;F21G4.6;F54D5.9;F57G12.1;klu-1;C32D5.8;D1022.5;F11D5.1;xrep-4;mrps-16;R52.6;T22B2.1;ogdh-1;T28A11.20;sdz-35;irld-27;col-177;hum-7;lin-41;prx-12;srv-17;vet-6;gska-3;thn-4;Y54E5B.2;Y106G6H.1;spv-1;C05C8.5;C48E7.6;rabn-5;msrp-1;F52H2.4;cyp-35B3;Y97E10AR.6
21ur-4863	21ur-4863	1.2166	5.2805	0.000961807	0.0424851	2.35470458170449 ± 0.315500507033611	IV	15926268	15926288	-	21ur-4863	col-113;cyd-1;ifg-1;klp-15;lin-11;lin-49;mec-14;pgp-10;pld-1;parp-1;pqn-87;rop-1;spp-15;srw-101;str-60;str-188;taf-1;tcl-2;unc-89;spon-1;xol-1;tufm-2;wdfy-3;vps-50;F11F1.1;F11F1.5;F20C5.6;F49E2.2;K11D2.4;T24C2.3;Y43F8B.14;lact-9;Y55D9A.2;spv-1;ZK829.9;gad-3;ugt-26;C26B9.1;ubr-4;hosl-1;acs-17;F12D9.2;F22E5.17;smk-1;sumv-2;F54G2.2;exc-6;kcc-3;R02D3.7;pygl-1;ztf-18;T25G12.2;jhdm-1;W01B11.6;Y4C6B.1;Y…	klp-15;xol-1;K11D2.4;msrp-2
21ur-10239	21ur-10239	1.2166	5.2805	0.000962378	0.0424851	2.35470458170449 ± 0.315500507033611	IV	15926267	15926287	-	21ur-10239	col-113;daf-8;dpf-4;elt-1;glt-6;hum-1;ifg-1;lin-11;ltd-1;mat-2;mec-14;mars-1;rae-1;pld-1;pqn-87;ric-8;spe-12;srj-29;srw-101;str-188;tag-53;tcl-2;spon-1;xol-1;scpl-1;fubl-1;spe-44;wdfy-3;vps-50;F11F1.5;srz-16;F20C5.6;mig-38;F49E2.2;K01G5.10;K11D2.4;T24C2.3;catp-6;Y39A1A.16;snrp-200;spv-1;ZK829.9;gad-3;C02B10.6;C04E7.4;C10G8.2;C17H12.4;ubr-4;hosl-1;atg-16.1;F12D9.2;vps-41;F36H12.10;sumv-2;athp-2;T2…	xol-1
21ur-4780	21ur-4780	2.23279	3.28908	0.000979039	0.0424851	5.02411298261651 ± 0.44576191812071	IV	15839015	15839035	+	21ur-4780	let-502;nhr-64;cyld-1;rpoa-1;vps-41;cutl-20;shc-1;Y22D7AR.2;M01A12.4
21ur-9911	21ur-9911	1.25298	5.16347	0.00100104	0.0424851	2.3747192013447 ± 0.390779557071802	IV	14714443	14714463	-	21ur-9911	btf-1;ima-1;snrp-27;nra-4;F56F11.2
21ur-12822	21ur-12822	1.25298	5.16347	0.00100123	0.0424851	2.3747192013447 ± 0.390779557071802	IV	14714441	14714461	-	21ur-12822	cpb-3;grl-7;pop-1;pqn-35;C34F6.5;K10D3.4;E04F6.6
21ur-3981	21ur-3981	1.25298	5.16347	0.00100176	0.0424851	2.3747192013447 ± 0.390779557071802	IV	14714440	14714460	-	21ur-3981	sre-24;cpb-3;dab-1;grl-7;pqn-35;R07B7.12;T01D3.1;fbxb-14	dab-1;fbxb-14
21ur-5720	21ur-5720	1.32348	4.71646	0.00100202	0.0424851	2.58077931381197 ± 0.0903828596498193	IV	15294145	15294165	-	21ur-5720	oac-4
21ur-2164	21ur-2164	1.3235	4.71646	0.00100553	0.0424851	2.58077931381197 ± 0.0903828596498193	IV	15294153	15294173	+	21ur-2164	aat-1;clh-5;col-53;col-91;col-121;col-148;col-158;col-173;daf-10;dhs-29;dim-1;dpy-6;dpy-7;dyf-6;egl-45;eor-1;fox-1;gcy-22;gly-2;gpb-2;gst-33;haf-3;him-1;isw-1;itr-1;lbp-3;let-23;lmn-1;lars-2;ccar-1;mig-23;mrp-7;mut-7;mut-14;nhr-68;npp-3;nsf-1;plc-3;parg-1;pmp-4;rad-50;rpn-5;sas-4;sel-5;sex-1;spg-7;srd-40;tor-2;twk-5;wrk-1;wrt-7;zen-4;asfl-1;folt-1;ugt-17;C08E8.5;C09F9.2;C09G1.2;pptr-2;C14A6.5;C25…
21ur-5255	21ur-5255	1.41933	4.9903	0.00101331	0.0424851	2.69085600330592 ± 0.603312930162982	IV	14866269	14866289	-	21ur-5255	srx-29;C43G2.3;gbb-2
21ur-5312	21ur-5312	1.20678	6.15218	0.00102035	0.0424851	2.28980868528952 ± 0.576383764060392	IV	14261634	14261654	-	21ur-5312	lrp-1;npp-10;pcp-2;sel-5;srd-15;str-64;str-208;str-255;tag-68;tsp-6;vbh-1;C10C5.7;C14C10.5;C34C12.2;F31D4.2;F53C11.5;F54D5.12;F57F5.1;T28A8.3;mecr-1;Y7A9A.1;efa-6;ZK795.2;ZK1098.3;ugt-7;prmt-4;C30E1.8;C34D10.1;F10G7.10;F20D6.11;F21A9.2;F40E3.6;F48E3.4;F54D10.4;teg-4;K08D9.2;R151.8;spat-3;tftc-1;gbb-1;F43D2.6;T28A8.8	ZK795.2
21ur-5831	21ur-5831	1.00377	9.62483	0.00102707	0.0424851	2.00252272745207 ± 0.425743404666609	IV	14868264	14868284	+	21ur-5831	ndx-3;smf-3;tbx-7;F14E5.1;dpyd-1;sdz-7;M02H5.8;Y55B1BL.1;fbxa-142;C10C5.4;C47F8.3;crml-1;ZC116.1;C32D5.7;gfrp-1;M03A1.8;W02H5.11
21ur-4578	21ur-4578	1.00377	9.62483	0.00102822	0.0424851	2.00252272745207 ± 0.425743404666609	IV	14868267	14868287	+	21ur-4578	dhhc-6;F45D11.14;F45D11.15;F45D11.16
21ur-4555	21ur-4555	1.14602	6.13588	0.00103603	0.0424851	2.22098570308046 ± 0.443941207753786	IV	15804809	15804829	+	21ur-4555	dcp-66;dcr-1;dhp-1;emb-30;flr-4;hsp-16.41;inx-22;let-19;msh-5;pqn-21;rbr-2;scd-2;unc-40;unc-129;cpna-5;lgc-43;F21G4.5;F34D10.6;F36A2.12;F36H2.3;F55F3.2;K10C3.5;T09F3.4;T28C6.7;W04E12.2;nlp-53;ilcr-1;egal-1;C32B5.15;F13H8.2;F18E9.3;F33G12.6;irld-7;mig-39;F48A9.1;F48E8.2;npr-30;K08B4.2;K09E3.5;gpx-7;T10E9.4;fbxb-34;mltn-8;nol-14;wago-5;K07H8.12;C33D9.13;F28A12.10;npr-16;uso-1;ZK524.4;cht-3;Y55F3BR.1
21ur-853	21ur-853	1.14602	6.13588	0.00103664	0.0424851	2.22098570308046 ± 0.443941207753786	IV	15804810	15804830	+	21ur-853	Y57G11C.31;K07E3.1
21ur-3466	21ur-3466	1.14602	6.13588	0.00103669	0.0424851	2.22098570308046 ± 0.443941207753786	IV	15804806	15804826	+	21ur-3466	nhr-69;rhi-1;tra-1;F13B12.3;best-14;T24B8.7;Y111B2A.3;mth-2;Y76B12C.6
21ur-1070	21ur-1070	-1.13212	5.117	0.00106025	0.0432421	0.46131079631201 ± 0.0475436725887545	IV	15568697	15568717	-	21ur-1070	ptr-22;clec-166;F43G9.12;ptp-4;irld-52;Y37H9A.1;math-16;srab-9;ubr-4;E02C12.8;pygl-1;nhr-225
21ur-785	21ur-785	1.88136	3.952	0.00106364	0.0432421	3.56088934687676 ± 0.684478886985701	IV	14403915	14403935	+	21ur-785	snf-2;pezo-1;E03H4.3;acl-13;F36A2.3;F58E6.6;T04H1.5;ZK596.3;cpsf-2;F54D7.2;T09B4.8;lpr-7
21ur-11139	21ur-11139	1.76784	4.10752	0.00106926	0.0432421	3.28788869586038 ± 0.76567538210959	IV	16751174	16751194	+	21ur-11139	srh-92;T28F4.1;Y116A8C.30;sqd-1
21ur-5595	21ur-5595	1.76781	4.10752	0.00107073	0.0432421	3.28788869586038 ± 0.76567538210959	IV	16751169	16751189	+	21ur-5595	mgl-1;srg-34;F53H4.6;D1014.7;K02F6.3;cht-4
21ur-128	21ur-128	-1.10391	6.09517	0.00108851	0.0438006	0.459233151158304 ± 0.116651748253332	IV	16835929	16835949	+	21ur-128	fer-1;srw-40;fbxb-8;H37A05.2;Y38H6C.13;fbxa-105;C27F2.6;mtp-18;dpy-22;fat-6;grd-2;Y75B8A.7;EEED8.15;R13A5.10
21ur-746	21ur-746	-1.72069	3.18906	0.00110399	0.0442633	0.275880733130912 ± 0.043239747775924	IV	5621165	5621185	-	21ur-746	let-363;rpl-11.1;rsd-2;vars-1;trr-1;C08B11.9;E03H4.2;F13E6.1;ccdc-149;srt-44;tofu-5;elpc-2;clec-10;ugt-25;C35E7.11;czw-1;oaz-1;lsy-12;F46B6.2;T06E4.9;ddl-3;B0563.8;F52G3.4;Y54F10BM.20
21ur-6153	21ur-6153	5.0931	2.42361	0.00115182	0.046015	Inf ± NaN	IV	16820182	16820202	-	21ur-6153	dnj-27;frm-10;gcs-1;gcy-7;gcy-33;gpa-8;let-363;mat-2;mec-2;phg-1;pqn-80;prx-1;rrf-2;rsd-2;srh-8;srh-39;srh-52;srw-19;srw-90;twk-24;C01B9.1;D1081.7;kcnl-2;F15H10.7;F26A3.1;F28B1.2;F32A7.4;clec-31;F54C9.7;ptp-4;K07G5.5;M162.7;T24B8.2;lpr-3;Y7A5A.7;Y17D7B.4;Y39E4B.5;hrpu-1;Y51A2B.6;Y53F4B.13;Y62E10A.13;ipmk-1;ugt-46;C04F1.1;srab-1;rha-2;C14A11.6;math-10;lst-5;E04F6.6;F29B9.7;F40G9.8;F41C3.11;F48E8.4…
21ur-5499	21ur-5499	3.30328	2.72396	0.00115869	0.0461232	14.6303115793588 ± 4.76205080515539	IV	6203345	6203365	+	21ur-5499	adm-4;ubc-24;npr-3;Y73B6BL.29
21ur-4927	21ur-4927	2.5853	3.24612	0.00116745	0.0461606	6.18621708229387 ± 0.974708051246952	IV	15880204	15880224	+	21ur-4927	col-83;pcp-2;unc-89;clec-65;clec-66;R07E4.1
21ur-9956	21ur-9956	-1.08049	5.24336	0.00118209	0.0461606	0.469436287114713 ± 0.0267291657486833	IV	4957585	4957605	+	21ur-9956	NA	NA
21ur-13580	21ur-13580	-1.08049	5.24336	0.00118456	0.0461606	0.469436287114713 ± 0.0267291657486833	IV	4957588	4957608	+	21ur-13580	cyp-13A7;ima-3;cyp-13A3;Y110A7A.15
21ur-15293	21ur-15293	-1.03134	5.90991	0.00122723	0.0468384	0.482954643925784 ± 0.0469559186293547	IV	13704786	13704806	+	21ur-15293	twk-12;ctc-1;W08G11.1;acs-22
21ur-2589	21ur-2589	-1.03134	5.90991	0.00122726	0.0468384	0.482954643925784 ± 0.0469559186293547	IV	13704775	13704795	-	21ur-2589	erm-1;gad-1;gtl-2;lpd-2;nhr-60;sqv-6;nrfl-1;unc-52;F21G4.6;nep-17;Y32B12B.4;ZK938.3;F47B3.7;Y69A2AR.31;tomm-70
21ur-8060	21ur-8060	1.03653	7.42161	0.00129387	0.0486928	2.05973051798261 ± 0.274418809466642	IV	14999882	14999902	+	21ur-8060	ketn-1;C32F10.8;set-15;Y70C5A.3;pgl-2;rme-4;twk-7;ugt-2;rpb-3;C51E3.10;F14B6.2;rbpl-1;M05B5.1;T13H5.8;T16G1.5;jun-1;W08G11.5;C24D10.5;C49A9.6;CC8.2;rpc-2;F25G6.1;igcm-1;F56F4.4;osg-1;npr-31;Y49F6B.8;T26H5.10
21ur-4085	21ur-4085	1.03654	7.42161	0.00129623	0.0486928	2.05973051798261 ± 0.274418809466642	IV	14999879	14999899	+	21ur-4085	dpy-26;lec-3;mec-10;ugt-2;T01D3.6;F26A1.3;F41H10.4;M02D8.5;lgc-50;fbxb-14;W08F4.12;Y9C9A.13;Y97E10B.1
21ur-4887	21ur-4887	5.08917	2.42593	0.00130593	0.0486928	Inf ± NaN	IV	13918439	13918459	-	21ur-4887	col-153;fkh-6;gst-41;srh-78;srh-166;vab-10;mus-101;F40G12.5;K07F5.12;T26C5.3;Y39E4B.10;nrps-1;D1044.6;F40H6.5;F56C3.4;ugt-10;Y54E10A.11;rep-1
21ur-1246	21ur-1246	1.95086	3.52607	0.0013226	0.0491262	3.95097883846485 ± 0.73940383083322	IV	14814102	14814122	+	21ur-1246	acp-7;npp-10;C18B12.6;F45F2.10;fbxb-14
21ur-2935	21ur-2935	1.61354	4.59199	0.00134001	0.0495583	3.03467559559191 ± 0.89756527643642	IV	5974848	5974868	-	21ur-2935	nex-1;snt-3;srg-30;asd-2;F36D3.5;mask-1;T16G12.1;chil-25;Y43F8B.2;Y43F8B.13;mrpl-9;F41G3.6;irld-8;T10E10.3;shl-1;T03F6.7;Y55F3C.9
21ur-12829	21ur-12829	-1.48134	4.22054	0.00136197	0.0500861	0.380684601589417 ± 0.0998201869956284	IV	5511724	5511744	+	21ur-12829	ama-1;him-4;klp-3;laf-1;mtm-9;tax-6;vab-10;wnk-1;npr-3;C09G5.7;D2005.4;F42H11.1;F52B5.3;ppm-2;W02B12.11;Y38E10A.17;acdh-6;C53H9.2;E03H12.5;irld-29;F45E1.5;K07H8.10;T20F5.6;T23B3.5;ift-139
21ur-7425	21ur-7425	1.45827	4.06163	0.00136939	0.0500965	2.9216156849113 ± 0.118409916593239	IV	16795393	16795413	+	21ur-7425	D2005.4;hgap-2;alh-13;rbmx-2
21ur-4078	21ur-4078	1.12453	5.62408	0.00137568	0.0500965	2.19632562867952 ± 0.242231992167592	IV	13700705	13700725	-	21ur-4078	NA	NA
21ur-12930	21ur-12930	1.12453	5.62408	0.00137578	0.0500965	2.19632562867952 ± 0.242231992167592	IV	13700706	13700726	-	21ur-12930	ceh-40;F44F1.4;cla-1
21ur-4063	21ur-4063	-1.04101	6.06742	0.00140195	0.0505522	0.481241931747017 ± 0.0735974219438745	IV	15960756	15960776	-	21ur-4063	mlh-1;ptp-2;srw-135;srx-131;tbx-7;F29D10.3;gadr-6;C05D9.3;C14C11.1;C18G1.9;F19F10.12;F21C10.9;F23C8.13;ubxn-3;R05F9.7;ZC317.6
21ur-4449	21ur-4449	-1.24804	4.65358	0.00141168	0.0507381	0.417326849663498 ± 0.0151861018228899	IV	16069173	16069193	+	21ur-4449	NA	NA
21ur-1794	21ur-1794	1.13605	6.29636	0.00141718	0.0507715	2.1815404936732 ± 0.282415925988239	IV	14541971	14541991	-	21ur-1794	act-2;cpb-3;hot-7;nhx-4;par-4;pes-23;rpl-15;src-2;C18B12.6;F36G3.1;F46G10.2;R05D7.5;C16D9.3;acdh-5;K05B2.4
21ur-6979	21ur-6979	-1.99654	4.11812	0.00142693	0.0509567	0.24328335106393 ± 0.0490138677917346	IV	17160767	17160787	-	21ur-6979	dyc-1;ggr-3;osm-6;srw-69;acd-3;R08A2.5;fbxb-59;C50D2.9;maoc-1;frpr-6;mfsd-6;F07E5.5;otub-2;pde-6;ZK1055.2;F57C12.6
21ur-4408	21ur-4408	1.11105	5.91294	0.00143228	0.0509836	2.14808598622566 ± 0.283289963439115	IV	14161007	14161027	-	21ur-4408	abt-2;bra-1;cpb-2;mom-5;nas-31;puf-8;trp-1;rbpl-1;R09A8.1;fcd-2;sta-1;ZK1307.4;pitr-3;C16C8.11;atg-16.1;Y18H1A.1;wdr-4;uvs-1;T06F4.3	sta-1
21ur-629	21ur-629	1.2198	5.54154	0.00144102	0.0510489	2.28419718193514 ± 0.472894916517952	IV	15340252	15340272	+	21ur-629	acr-14;atgp-1;atl-1;bbs-2;ceh-44;chn-1;clk-2;daf-15;dnj-22;alp-1;ech-8;egl-27;evl-14;fum-1;glh-3;glt-4;gop-2;grl-14;gst-36;hcp-6;ifd-2;inx-1;irk-3;lap-1;let-630;lst-4;mec-1;nhr-134;pxf-1;rad-54;ret-1;spd-5;srh-149;srw-130;srw-138;fbxa-199;str-150;str-208;tra-2;twk-3;unc-34;unc-52;unc-112;zfp-1;utp-20;pot-3;ctr-9;ccm-3;C17D12.7;set-32;clec-151;F20C5.5;F21D9.4;F21H7.3;rtel-1;F26C11.1;fbxa-99;F44D12…
21ur-4721	21ur-4721	1.44142	4.65607	0.00145869	0.0510489	2.69639772644487 ± 0.592551571267511	IV	5600980	5601000	-	21ur-4721	B0464.6;F32H5.4;R11E3.2;atg-5
21ur-7646	21ur-7646	1.44137	4.65607	0.00146513	0.0510489	2.69639772644487 ± 0.592551571267511	IV	5600983	5601003	-	21ur-7646	apc-10;tag-124;lron-4;srm-6;T25C12.3;chil-11;kcc-2;zfp-3;dmsr-9;ZC513.2
21ur-2427	21ur-2427	1.44136	4.65607	0.00146674	0.0510489	2.69639772644487 ± 0.592551571267511	IV	5600999	5601019	+	21ur-2427	iglr-2
21ur-9583	21ur-9583	1.24893	4.99271	0.00148619	0.0510489	2.36300212129083 ± 0.365771549355647	IV	15897362	15897382	-	21ur-9583	col-116;odr-1;pms-2;str-57;madd-3;ZK1053.1;attf-4;C17C3.1;K10B4.3;T04C12.33
21ur-2794	21ur-2794	1.24892	4.99271	0.00148713	0.0510489	2.36300212129083 ± 0.365771549355647	IV	15897358	15897378	-	21ur-2794	ced-4;sru-25;srw-130;str-159;B0250.8;idh-2;pxd-1;F49E12.12;Y54G11A.11;ugt-6;atg-18;srsx-8;F53B3.6;ilcr-2;bgal-2;M04F3.5;ceh-54;Y75B7AL.2;ZC196.4;ZK154.6;Y57G11C.52
21ur-8410	21ur-8410	1.00717	7.15536	0.00148874	0.0510489	2.0124233191175 ± 0.432247830990112	IV	5873199	5873219	+	21ur-8410	srh-233;srh-237;srh-239;srh-246;ZK896.5;Y50D7A.8
21ur-3331	21ur-3331	1.26545	5.21364	0.00149546	0.0510489	2.34629581529483 ± 0.493435919997991	IV	13990335	13990355	+	21ur-3331	acy-1;haf-1;srb-8;T22C1.3;cct-3;cng-2;kup-1;rme-8;wrt-2;F19C6.2;F38B2.3;F52E10.2;Y16B4A.2;C52A10.2;nhr-186;atg-9;ZC328.3;R06A10.5
21ur-11253	21ur-11253	1.26544	5.21364	0.00149713	0.0510489	2.34629581529483 ± 0.493435919997991	IV	13990332	13990352	+	21ur-11253	rad-54;sri-10;shn-1;dgk-4;F16A11.1;mbr-1;F54G2.1;glit-1;fbxb-18;K05F6.4;pqn-52
21ur-9206	21ur-9206	1.515	4.20743	0.00151274	0.0510666	2.77521045958975 ± 0.368412525705767	IV	14038774	14038794	-	21ur-9206	dsc-1;grl-2;hmp-1;mec-6;nhr-84;pmp-4;prx-3;ptc-3;srw-141;srw-142;str-180;sur-2;twk-8;unc-33;unc-34;unc-44;clec-162;C09F12.3;C25D7.10;tbc-19;prp-4;C53D6.6;rtcb-1;F25D7.5;F26C11.1;fecl-1;sprr-1;mrps-18B;T22C1.6;tiar-2;fipr-17;ekl-4;cyc-2.2;svop-1;C02F5.13;fbxa-170;D1007.8;fbxb-108;ugt-41;F19F10.1;rbbp-5;F32D1.5;myo-5;F59A6.5;H23L24.1;ugt-19;gsto-3;pqn-52;hrg-1;R04E5.8;R12C12.5;T23F2.2;Y9C9A.1;Y17G9…
21ur-4860	21ur-4860	1.51498	4.20743	0.00151417	0.0510666	2.77521045958975 ± 0.368412525705767	IV	14038775	14038795	-	21ur-4860	hcp-6;let-2;smg-2;str-180;C13C4.4;C17E4.1;cpt-5;F22B5.5;snx-27;F26C11.1;aptf-4;F58G11.3;T01B4.3;gcn-2;ZK792.5;skpo-2;rbbp-5;lact-1;R04E5.8;C45G7.13	gcn-2
21ur-6171	21ur-6171	1.11342	5.93092	0.00152168	0.0510666	2.18745877175351 ± 0.415575938800958	IV	14600196	14600216	+	21ur-6171	hsp-3;lin-13;sax-2;str-93;itsn-1;tig-2;M163.5;Y52B11A.4;oac-10;D2096.5;trx-4;Y71G12B.25
21ur-11732	21ur-11732	1.11342	5.93092	0.00152197	0.0510666	2.18745877175351 ± 0.415575938800958	IV	14600193	14600213	+	21ur-11732	let-413;npp-12;abhd-11.1;mspn-1;C42C1.8;trx-4;ZC404.7
21ur-514	21ur-514	1.48872	4.41031	0.00157469	0.0526761	2.9056303645273 ± 0.651287678629875	IV	17129797	17129817	-	21ur-514	ced-7;cul-4;dig-1;dpf-2;nhr-127;pld-1;slt-1;ttn-1;mdt-10;drsh-1;nkcc-1;Y51B9A.5;ZC434.9;C32B5.13;C48E7.6;nhr-172;nep-9;jmjd-3.1;did-2;F40F4.7;F41H10.4;F47G3.1;F54C1.6;emc-1;R10F2.5;T10B11.8;lgc-45;Y27F2A.6;ZC21.6;cil-1;pros-1;col-12;egl-10;gcy-8;gly-19;jip-1;let-711;lars-2;nhr-62;nmy-2;ula-1;C50F4.12;F25H2.3;cwp-5;memi-3;JC8.7;nfya-1;spat-2;Y70D2A.1;math-6;sec-15;fbxa-120;apy-1;usp-39;ceh-81;F59A…
21ur-2983	21ur-2983	1.17094	7.11243	0.00166323	0.0551398	2.25905631248878 ± 0.584158724424229	IV	16707990	16708010	+	21ur-2983	smg-1;ruvb-1;ubr-5;F53H4.6;T07G12.2;T07G12.4;T26C5.3;tftc-3;C32D5.7;C53H9.2;F39C12.1;pygl-1;kvs-5;cdh-7;ikb-1;imb-2;grsp-2;Y57A10B.6;sql-1;C06A6.4;fln-1;Y102A11A.3
21ur-6322	21ur-6322	-1.54271	3.74439	0.00170183	0.05578	0.32254087337449 ± 0.126883330399418	IV	17234765	17234785	+	21ur-6322	rha-1;F13G3.7;K04C2.2
21ur-10269	21ur-10269	-1.54272	3.74439	0.00170263	0.05578	0.32254087337449 ± 0.126883330399418	IV	17234764	17234784	+	21ur-10269	unc-22;C06H5.6;F46A9.1;scpl-4;E02C12.6;F26A1.13;cox-18;Y82E9BR.1
21ur-8761	21ur-8761	1.50107	4.46004	0.00172378	0.0562727	2.79519022598658 ± 0.254091893134076	IV	14561196	14561216	+	21ur-8761	clu-1;flp-17;npp-12;sdc-1;sqv-7;F49C12.10;srsx-21;tiar-1;fbxa-52;chd-3;mlk-1;aagr-3;F58H10.1;chil-22;R09D1.12;npr-20;Y48C3A.14;flcn-1;F55A3.2;Y53G8AL.1;ZK484.4	Y48C3A.14
21ur-11763	21ur-11763	1.03609	6.07695	0.00174337	0.0562727	2.02916042913432 ± 0.263358150884855	IV	16098299	16098319	-	21ur-11763	abt-4;bli-3;daf-18;nhx-8;sra-37;tln-1;D1053.4;srt-55;B0041.5;F11G11.5;ugt-42;fbxb-83;nekl-1;gbb-2
21ur-11806	21ur-11806	1.03609	6.07695	0.00174369	0.0562727	2.02916042913432 ± 0.263358150884855	IV	16098295	16098315	-	21ur-11806	atl-1;atm-1;ect-2;pgp-1;zipt-13;C31E10.5;C31H5.6;cfp-1;aakb-1;K03A11.1;R90.1;vps-39;sld-5;ZC376.6;cpna-2;C14A11.5;C36B7.2;akap-1;cutl-29;F46F11.1;F48E3.2;K04A8.1;K11D12.6;nekl-1
21ur-295	21ur-295	1.03609	6.07695	0.00174387	0.0562727	2.02916042913432 ± 0.263358150884855	IV	16098296	16098316	-	21ur-295	bbs-2;dsl-1;ggr-2;grd-9;xpo-3;pgp-1;C50H2.4;srz-18;F54F7.3;cpna-2;C53A3.1;insc-1;K11D12.6;nekl-1;Y20F4.8
21ur-1656	21ur-1656	1.1283	7.82246	0.00174444	0.0562727	2.18283849911794 ± 0.606505374763136	IV	14097572	14097592	-	21ur-1656	cyn-6;dnj-16;dpf-4;nhr-1;pqn-10;glb-8;W02D9.4;F13H8.8;T25F10.3;W08F4.10
21ur-12864	21ur-12864	1.00085	6.1511	0.00174807	0.0562727	1.9854965000571 ± 0.118944364310513	II	1255983	1256003	+	21ur-12864	nhr-65;sri-26;iglr-1;F21G4.3;Y52B11A.4;Y43H11AL.1
21ur-3380	21ur-3380	1.41435	4.30169	0.00179967	0.0576462	2.65155436216018 ± 0.448781528149165	IV	15564401	15564421	-	21ur-3380	C31E10.5;F31D4.5;F45E10.2;fbxa-210;Y51A2D.18;Y105C5B.20;T19D2.1;R05C11.4
21ur-9047	21ur-9047	-1.86723	3.46798	0.00180112	0.0576462	0.263968275819076 ± 0.0345831463183036	IV	6264774	6264794	-	21ur-9047	ceh-82;dyc-1;ifta-1
21ur-9783	21ur-9783	1.38367	5.50433	0.00183247	0.0578617	2.63685072894702 ± 0.663089578622758	IV	15569083	15569103	-	21ur-9783	kal-1;F49B2.6;clec-247
21ur-3657	21ur-3657	1.38367	5.50433	0.0018325	0.0578617	2.63685072894702 ± 0.663089578622758	IV	15569086	15569106	-	21ur-3657	srh-21;F08G5.3;swan-2;M79.2;W04A4.5;ZC247.1
21ur-15463	21ur-15463	1.38367	5.50433	0.00183262	0.0578617	2.63685072894702 ± 0.663089578622758	IV	15569089	15569109	-	21ur-15463	amt-4;coh-1;emb-5;gcy-15;oat-1;rme-4;tag-124;C16C10.1;F07B10.4;F32D8.8;pho-6;R04E5.8
21ur-917	21ur-917	1.10493	8.21957	0.00185561	0.0578617	2.14868584294198 ± 0.572025795519886	IV	16821915	16821935	-	21ur-917	daf-14;lin-10;rpc-1;sma-6;srd-45;unc-18;unc-61;C25A1.1;C27B7.5;F23D12.2;uggt-2;slc-25A32;K09G1.1;M199.2;lron-14;T10G3.3;saeg-2;agef-1;Y32B12B.4;Y43F8C.18;gcn-2;Y105C5B.15;C44E4.5;F16B4.5;F28A10.4;F42A10.5;F56F10.2;bath-21;bath-5;K06H7.2;T05H4.15;ugt-12;T20B12.4;Y45G5AM.3;Y45G12C.4;Y48G1BM.6;ddx-35;F36A2.14;fipr-5;tag-267;C41D11.10;K10G6.9;R03H10.11;egl-10;frm-4;mua-3;srh-18;str-85;str-211;cal-5;B…
21ur-11333	21ur-11333	1.10493	8.21957	0.00185588	0.0578617	2.14868584294198 ± 0.572025795519886	IV	16821912	16821932	-	21ur-11333	che-3;gfl-1;sop-2;srx-73;droe-4;Y39A1A.14;C04E6.5;C08G9.2;C10A4.1;EEED8.15;tin-44;W05G11.4;F11E6.11
21ur-5357	21ur-5357	1.15695	5.02031	0.00185995	0.0578617	2.31043434059162 ± 0.331088848585484	IV	15105629	15105649	-	21ur-5357	acr-14;ama-1;cct-5;col-182;dpy-28;far-2;gcy-37;gfi-2;gly-4;gly-5;gly-20;mca-3;mec-2;pabp-2;pat-12;plx-1;pqn-83;pqn-87;ptp-2;ras-1;sad-1;srd-4;srh-92;srw-2;str-109;ctbp-1;nrfl-1;tsr-1;twk-17;unc-29;unc-108;unc-115;6R55.2;dohh-1;har-1;C17E4.2;C34F6.10;sams-1;srsx-26;nlp-59;ent-6;idha-1;K03H1.12;ctf-18;atp-6;T03F7.6;T04F8.3;T07D4.2;slc-17.9;jun-1;dkf-2;mlt-11;zip-3;Y39A1A.3;Y39E4B.6;dhhc-2;snx-14;ar…
21ur-5433	21ur-5433	-1.21054	4.90968	0.00188503	0.058478	0.429308652644707 ± 0.0311695230919298	IV	5825470	5825490	+	21ur-5433	NA	NA
21ur-13977	21ur-13977	1.30426	4.66283	0.0019077	0.0590165	2.52311596879492 ± 0.0487556823270522	V	14393808	14393828	+	21ur-13977	itx-1;nsy-1;ram-5;str-230;swp-1;C08H9.1;F38H4.4;Y37E11AL.9;mltn-7
21ur-10241	21ur-10241	1.72232	3.68472	0.00191693	0.0591374	3.43329503969304 ± 0.430634366613222	IV	15267154	15267174	-	21ur-10241	amt-2;col-135;dig-1;elt-1;frm-7;gcy-18;gly-2;kap-1;ngn-1;nhr-87;nuo-1;ebax-1;prx-1;srj-5;sul-1;taf-5;mlt-2;C15H7.4;pals-7;lron-5;F20G2.5;glb-18;F53F1.4;F54B3.1;F56H11.2;T02G6.3;T15D6.5;dkf-1;Y43F8C.18;spat-2;ska-1;ZC374.2;C27D6.1;C28H8.7;C49C8.5;C50E3.9;F27C1.1;ift-81;R08F11.1;cdh-1;acdh-10;pygl-1;cgr-1;Y46H3C.5;supr-1;Y73C8C.4;Y119C1B.6;ZC449.1;ZK354.8;ZK1055.6;pals-11;Y110A7A.21;T05B4.14;T05A7.…
21ur-6380	21ur-6380	-1.15297	4.62975	0.00196854	0.0599114	0.447880164382636 ± 0.0496032118933161	IV	14962406	14962426	+	21ur-6380	D2045.5;gpx-2;T04D3.1;sdz-12
21ur-10659	21ur-10659	-1.15297	4.62975	0.00196899	0.0599114	0.447880164382636 ± 0.0496032118933161	IV	14962403	14962423	+	21ur-10659	nhl-1;C44H4.4;sdz-12;H06I04.6
21ur-4991	21ur-4991	-1.36479	4.75217	0.00198175	0.0601347	0.385138781867566 ± 0.0175204149808513	IV	14508849	14508869	+	21ur-4991	adm-2;kat-1;lam-3;rnp-2;F35G12.12;cyp-29A2;rga-1;C32B5.13;acly-1;K02E7.10;Y71H2AR.2	rga-1
21ur-8326	21ur-8326	1.73142	3.53864	0.00200652	0.0602161	3.55217698839027 ± 0.21277669653887	IV	15570028	15570048	+	21ur-8326	abt-5;dhp-2;dys-1;fut-8;gpb-1;lin-40;plc-1;sax-2;srj-29;unc-14;unc-41;zen-4;C01G6.9;C11E4.6;C36H8.1;mogs-1;tat-5;R10H10.7;B0205.4;C16D9.3;cyp-33B1;C27H5.2;pks-1;magu-3;rpa-1;H06I04.5;H24G06.1;R03E9.2;acs-3;Y71G12B.13;acs-6;C06H5.12;C06H5.13;C06H5.14;elt-2;glr-2;gst-13;him-4;lin-39;lars-1;mab-5;nas-37;pha-1;rfc-1;set-2;srh-255;tra-1;unc-44;C18E9.8;C50H2.5;F16B12.6;F32G8.2;gadr-6;golg-4;clip-1;pnn-…
21ur-2675	21ur-2675	1.05379	5.81225	0.00201012	0.0602161	2.08002939317371 ± 0.368776006944732	IV	15316350	15316370	+	21ur-2675	dhc-1;dpy-1;spr-5;F43D9.1;K08H10.6;T01H3.2;oac-41;T14B4.3;Y17G9B.2
21ur-10281	21ur-10281	1.05379	5.81225	0.00201154	0.0602161	2.08002939317371 ± 0.368776006944732	IV	15316349	15316369	+	21ur-10281	dig-1;ran-2;sax-3;srh-292;srw-89;tam-1;E02H4.4;K08H10.6;T01H3.2;T14G10.5;dnc-4;oac-41;T14B4.3;T10F2.5
21ur-719	21ur-719	1.28297	4.55144	0.0020304	0.0602188	2.46580510370759 ± 0.342686012079589	IV	14463088	14463108	-	21ur-719	atm-1;bli-3;cdh-10;kin-20;mig-22;rcq-5;srh-48;tag-65;twk-9;twk-11;unc-116;gbf-1;C50H2.4;F11D11.6;myo-6;F55G11.1;T03F6.3;T05F1.13;T26C5.2;T27A8.5;cutl-6;Y51B9A.5;mlt-10;C18F10.2;irld-23;C36C5.14;F09G2.1;nep-6;asp-13;F35F10.13;F39C12.1;F52G3.5;duox-2;R03E9.2;T22F3.11;Y67D8B.5;sqd-1;ZK546.14;Y37A1A.4;Y43F8B.15;C41D11.10
21ur-7963	21ur-7963	-1.49542	3.79806	0.00203174	0.0602188	0.342202180831055 ± 0.0424361931410415	IV	15317799	15317819	+	21ur-7963	hpo-33;F28B1.2;vps-41;F35H10.10;K07E3.9
21ur-6861	21ur-6861	-1.03026	5.36705	0.00204713	0.0604665	0.485862668839873 ± 0.0365022132914364	IV	15322858	15322878	-	21ur-6861	fkh-9;his-24;myo-3;pdi-2;snf-5;str-221;unc-3;B0393.3;chil-5;dhhc-7;C53B4.1;F21C3.6;cids-2;F38A1.8;gipc-2;H16D19.3;K08H10.6;T05H10.4;T07D10.3;dkf-2;Y5F2A.4;Y17G7B.10;snpc-1.2;fcd-2;yars-1;npr-32;gad-3;krr-1;C23G10.2;C25H3.1;got-2.1;F16B4.6;symk-1;F26F12.3;F47B7.2;pqn-52;dop-3;T22B2.1;Y46E12BL.2;D2062.13;Y51H4A.941
21ur-6318	21ur-6318	1.26604	4.80977	0.00206192	0.0605576	2.45564387235832 ± 0.512537171667515	IV	13998026	13998046	-	21ur-6318	inx-1;nmr-1;tag-51;Y49E10.21;Y53F4B.13;shk-1;R02C2.7;ttr-42
21ur-15137	21ur-15137	1.26604	4.80977	0.00206327	0.0605576	2.45564387235832 ± 0.512537171667515	IV	13998025	13998045	-	21ur-15137	gop-1;nmr-1;sri-24;chil-6;chil-9;shk-1;mig-39;pck-1;ttr-42
21ur-4183	21ur-4183	1.05788	7.05026	0.00206657	0.0605576	2.07723310555136 ± 0.36393250616045	IV	14977707	14977727	-	21ur-4183	bra-1;M163.5;dcaf-1
21ur-5801	21ur-5801	1.9327	3.67865	0.00208406	0.0609095	3.84432289008832 ± 0.735951727372738	IV	15960492	15960512	+	21ur-5801	lbp-7;sul-1;clec-143;algn-2
21ur-2533	21ur-2533	-1.04479	5.77518	0.00217849	0.0628117	0.490058943949045 ± 0.0871851854859439	IV	14259503	14259523	+	21ur-2533	spat-1
21ur-4580	21ur-4580	-1.04479	5.77518	0.00217968	0.0628117	0.490058943949045 ± 0.0871851854859439	IV	14259502	14259522	+	21ur-4580	algn-11;frpr-3;fbxc-51
21ur-8010	21ur-8010	2.46149	3.15632	0.00218051	0.0628117	5.38920890516233 ± 0.865587331457834	IV	16013979	16013999	-	21ur-8010	col-20;sid-1;srh-95;str-94;unc-89;ugt-44;pfas-1;ain-1;F39C12.1;sdz-18;tag-234;K05F6.4;aagr-2;T23B12.5;ZK380.4;F23D12.10;C09B9.85
21ur-12421	21ur-12421	2.46145	3.15632	0.00218308	0.0628117	5.38920890516233 ± 0.865587331457834	IV	16013978	16013998	-	21ur-12421	col-20;gex-3;parg-1;sid-1;smf-2;srh-95;str-94;unc-40;wdfy-3;srbc-82;C47E12.3;pfas-1;C39D10.7;F41G3.6;tag-234;K05F6.4;ZK1248.15;C09B9.85
21ur-8180	21ur-8180	4.90667	2.32177	0.00223333	0.0636227	Inf ± NaN	IV	4946295	4946315	+	21ur-8180	glt-6;iars-1;lad-2;nas-23;srd-34;C34B7.2;C55A1.1;fbxa-107;clec-95;nep-15;mage-1;pdp-1;pals-37
21ur-3166	21ur-3166	-1.06497	5.23006	0.00223818	0.0636227	0.487778935070515 ± 0.074996868566139	IV	6180665	6180685	+	21ur-3166	cpin-1;dhs-15;far-7;mel-11;nas-39;pezo-1;arrd-14;tat-3;Y51H4A.25;Y116F11B.14;C14A11.6;CC8.2;K03H9.3;R155.3;T01B11.1;T02G5.3;math-42;mab-31;W03D8.11;srx-122;F11C3.1;clec-170;mig-38;Y38H6C.21
21ur-9597	21ur-9597	-1.06497	5.23006	0.00223991	0.0636227	0.487778935070515 ± 0.074996868566139	IV	6180664	6180684	+	21ur-9597	F11C3.1;myrf-2;clec-170;ZK287.4;ogdh-2;fbxc-25
21ur-2604	21ur-2604	-1.07505	5.72726	0.00230589	0.0653298	0.477785204987896 ± 0.0576103603971689	IV	13635208	13635228	-	21ur-2604	eea-1;Y57G11B.3;F25B5.5;Y48G1BR.1
21ur-1439	21ur-1439	-1.74893	3.3838	0.00232706	0.0657617	0.276845250563301 ± 0.07533085638771	IV	13612687	13612707	+	21ur-1439	dhp-1;fog-1;let-363;mab-5;str-162;unc-80;C11H1.2;T13H10.2;Y53F4B.13;C30F12.3;H05C05.1;T14B4.1;T28D9.4;Y48G1A.1;T28B8.6;T06D4.6;rad-51;smp-1;lact-6;C49F8.1;gmeb-2;dld-1;lipl-4;brc-2;sssh-1;rad-8
21ur-456	21ur-456	1.28839	5.09516	0.00235247	0.066311	2.41620445738508 ± 0.600516851013738	IV	15118472	15118492	-	21ur-456	col-44;rpn-8;M03F4.4
21ur-3401	21ur-3401	1.09309	9.5662	0.00237083	0.0666483	2.13337772556645 ± 0.639702592380061	IV	13906594	13906614	-	21ur-3401	micu-1;soap-1
21ur-5028	21ur-5028	-1.02798	6.54042	0.00237644	0.0666483	0.501211292859577 ± 0.120160796414088	IV	5809473	5809493	-	21ur-5028	clh-6;raga-1;twk-4;agmo-1;C26E1.1;xbx-5;T28A8.6;ZK896.1;srz-23;F59A3.2;atg-9;Y37H2A.13
21ur-2089	21ur-2089	1.47308	4.1042	0.00238608	0.0667501	2.76949213079654 ± 0.297222969534104	IV	16905971	16905991	-	21ur-2089	cca-1;cku-70;cyk-1;dop-2;xnd-1;hum-6;knl-1;mig-1;mog-4;mog-5;asns-1;pct-1;sax-2;sel-1;fut-3;ppm-1;tim-1;twk-21;unc-33;unc-44;wah-1;utp-20;chd-7;B0035.6;B0464.6;tbc-19;F23B2.7;rtel-1;F29C6.1;F32B4.4;F36F2.2;F38H4.4;F43G9.12;F49E2.5;ccz-1;K07A12.1;K08F4.5;K09A9.6;M01E5.3;M117.4;R07E5.1;chil-18;R10E9.3;R11.3;R11D1.10;T03D8.6;zim-1;zim-3;lsd-1;T13H5.6;T21C9.6;T24B8.7;tat-3;Y6B3B.3;acdh-11;Y57A10A.1;Y…	fut-3
21ur-1930	21ur-1930	1.62018	3.76424	0.00246432	0.0684218	3.10509103686085 ± 0.124332216401443	IV	13751790	13751810	+	21ur-1930	act-3;akt-2;alh-4;egl-4;egl-30;ego-2;grk-2;kin-20;mab-5;nhr-85;pif-1;pph-4.2;pqn-87;srj-4;srx-12;mrck-1;ufd-2;unc-46;unc-63;unc-75;unc-103;cal-5;vha-11;C11G10.1;ccm-3;C35A5.8;fbxb-65;C47G2.3;D2030.2;F02H6.2;mob-2;F40E10.5;F42G4.5;F54D1.6;meg-2;ndfl-4;R07B7.2;zipt-9;mlt-11;W05B5.1;Y43F8B.1;Y48C3A.18;Y48G10A.6;Y51A2D.18;Y52B11A.10;Y62E10A.13;Y105C5A.1;ZK1073.2;misc-1;C01B10.6;EEED8.10;F07F6.7;tpp-2…
21ur-10371	21ur-10371	-1.19297	5.17224	0.00247733	0.0686116	0.425517845048873 ± 0.0878793855229651	IV	5670241	5670261	-	21ur-10371	ctl-1;ctl-2;ego-2;lec-2;let-4;let-721;nhr-95;nhr-124;osm-1;pld-1;pxn-2;rme-6;ser-1;sop-3;srd-40;srx-38;srx-50;suf-1;ttn-1;uev-3;C17E4.6;fbxa-136;C28A5.6;C31E10.6;C31H5.1;C49C3.11;D1025.1;D1081.9;F19B2.6;F32H2.8;fbxb-117;Y15E3A.3;cup-14;ctl-3;Y57G11C.23;ftr-1;C05C8.8;erp-44.2;C09F5.1;C42D4.1;cyp-33C2;C46A5.1;C52B9.4;ipla-4;cpsf-2;F11D5.1;mth-2;bath-4;bath-7;F56C3.4;bath-3;H34C03.2;K06A5.1;R01B10.6…
21ur-6307	21ur-6307	1.22163	4.83229	0.00249561	0.0687616	2.38201930648466 ± 0.339505329017977	IV	14577635	14577655	-	21ur-6307	cyd-1;sft-4;trm-1;vps-52;C14B4.2;C46C2.6;irg-4;F25H9.2;T15H9.6;C15B12.4;T05A12.4;T19A5.3;T20H9.6;Y42H9B.3;ZK353.9;fbxb-87;ugt-35
21ur-2698	21ur-2698	1.09708	5.02726	0.00251184	0.0687616	2.20153440727934 ± 0.255773581944729	IV	13946067	13946087	+	21ur-2698	clh-4;gcy-21;Y39B6A.43;C35E7.7;tag-234;lips-17;T08B1.4
21ur-13490	21ur-13490	1.09708	5.02726	0.00251315	0.0687616	2.20153440727934 ± 0.255773581944729	IV	13946064	13946084	+	21ur-13490	NA	NA
21ur-1342	21ur-1342	2.28575	3.03303	0.00253536	0.0687616	5.19207966307354 ± 0.489850270621421	IV	13989627	13989647	+	21ur-1342	fkb-6;imb-3;nhr-120;pept-2;osm-12;tra-2;best-13;F40F12.7;T01H3.3;ZK1037.6;C01G8.1;hpo-12;ltah-1.1;F19C7.5;F28C10.3;acs-4;F49E8.7;K12H4.5;gei-8;nhr-116;sams-5;unc-52;C13B4.1;C14B4.2;F46C5.9;F57A8.4;best-25;Y52B11A.11;C50C3.2;sre-51;Y58A7A.3;Y58A7A.4	C13B4.1
21ur-10423	21ur-10423	2.28574	3.03303	0.0025376	0.0687616	5.19207966307354 ± 0.489850270621421	IV	13989630	13989650	+	21ur-10423	itx-1;crn-7;C03F11.2;fbxb-36
21ur-10492	21ur-10492	4.83269	2.2976	0.00253801	0.0687616	Inf ± NaN	II	13247294	13247314	-	21ur-10492	dhs-5;ego-1;gon-4;let-363;lin-61;nxf-1;pll-1;pqn-85;dhc-3;C38D9.2;bgnt-1.1;F15D4.5;rtcb-1;F32H2.6;chd-1;vps-53;T28D6.4;snrp-200;lin-38;Y54G11A.2;Y66D12A.6;tpst-1;nep-24;svop-1;ZK1067.3;kynu-1;sre-9;C30A5.4;ubr-4;ttr-10;rgl-1;F39C12.1;K09E2.1;ctsa-1;M03F8.3;Y38A10A.2;Y94H6A.5;ZC395.5;T07A5.7;F32H2.12
21ur-5907	21ur-5907	-1.01013	4.86243	0.00256685	0.0687616	0.478184325803336 ± 0.0637596122237436	IV	14701405	14701425	+	21ur-5907	tag-52;twk-13;uaf-1;F47B3.7
21ur-10506	21ur-10506	-1.01013	4.86243	0.00256865	0.0687616	0.478184325803336 ± 0.0637596122237436	IV	14701404	14701424	+	21ur-10506	twk-13;oig-8;jmjc-1;W03G9.5
21ur-6018	21ur-6018	4.80738	2.27777	0.00258431	0.0687616	Inf ± NaN	IV	6453342	6453362	-	21ur-6018	npp-5;oxi-1;pat-2;rrf-1;srw-8;zyg-12;C31C9.2;F14D7.5;F15H10.7;aptf-3;cids-2;lipl-1;him-18;T24H10.1;Y43F8B.9;Y54G11A.3;C25G6.3;C48E7.6;CD4.8;lmd-4;spg-20;K09F6.4;M151.2;R02F11.1;W03G9.2;W08E12.3;txl-1;ZK402.2;ZK402.3;ZK402.5;set-18
21ur-11726	21ur-11726	-1.16939	4.73692	0.00258521	0.0687616	0.455307554136755 ± 0.0433917053660363	IV	14535867	14535887	-	21ur-11726	xpo-3;pad-1;rib-1;str-246;F01G10.6;clec-96;ZK596.2;ZK1098.3;ddo-2;islo-1;hpo-6
21ur-6612	21ur-6612	-1.16937	4.73692	0.002588	0.0687616	0.455307554136755 ± 0.0433917053660363	IV	14535868	14535888	-	21ur-6612	fkh-2;pak-1;rars-2;srd-3;vav-1;D2005.4;nhr-152
21ur-3525	21ur-3525	1.07359	7.12058	0.00263472	0.0698331	2.10689577094718 ± 0.543660519148825	IV	15099767	15099787	+	21ur-3525	mrp-1;pcp-2;abu-13;srgp-1;M01G12.9;such-1;inst-1;C09B9.2;E02H9.4;cpsf-2;F16H11.1;gbas-1;lipl-4;Y54E10BR.4;mog-1;mtm-3;copa-1
21ur-9431	21ur-9431	-1.31847	4.23092	0.0026491	0.0698331	0.38814852350067 ± 0.0484294255980878	IV	15604694	15604714	+	21ur-9431	acr-17;akt-1;atn-1;cah-1;cdh-4;cec-1;cky-1;cle-1;cpin-1;cyn-9;dhs-19;dnj-8;dpy-21;dyf-2;egl-15;egl-45;emb-9;emb-30;far-3;fsn-1;fut-4;gei-6;glr-4;gon-2;gpa-14;grl-1;his-31;hum-1;itr-1;lst-2;mgl-2;ncr-2;ngp-1;nhr-16;nhr-69;nhr-70;nhr-97;npp-9;nsf-1;pqn-29;pqn-80;ptr-22;rol-1;rom-2;rpm-1;sax-3;sir-2.1;smg-2;smn-1;srh-48;srv-4;srw-31;srw-61;srw-95;srw-100;str-114;str-139;sym-3;ttn-1;nrfl-1;nduf-2.2;t…
21ur-5030	21ur-5030	1.2082	4.89352	0.00268527	0.0698476	2.30563987531197 ± 0.336675448843004	IV	15228810	15228830	-	21ur-5030	dpy-11;frm-9;plc-3;ptr-23;rpl-24.2;madd-3;F54E4.2;chil-18;mrpl-16;T28A8.5;set-25;ZK1098.1;C33C12.10;C46A5.6;D1007.8;pccb-1;F53E10.6;Y24D9A.6;Y48A5A.1;icd-2;ZK652.8;nep-25;F32H2.11
21ur-4238	21ur-4238	1.2595	5.47382	0.0027311	0.0698476	2.43366273309099 ± 0.511761988712811	IV	15912956	15912976	-	21ur-4238	lfe-2;parg-1;srh-216;ugt-1;chst-1;F42F12.4;T13C5.9
21ur-10848	21ur-10848	1.34663	5.5922	0.0027351	0.0698476	2.50779321403688 ± 0.721825283116462	IV	16014934	16014954	-	21ur-10848	bbs-2;cdh-4;cft-1;flp-19;gcy-11;grl-1;grl-3;isw-1;lem-3;let-268;let-526;lrp-1;mom-4;pek-1;pik-1;pld-1;ptr-4;rps-23;sax-2;skr-7;skr-10;sma-2;sra-12;srh-48;sue-1;dgk-4;twk-32;unc-76;C01G10.9;C05D12.2;C15C6.4;C23H4.6;C25G4.7;csa-1;F19C6.4;F21G4.6;F33H1.4;oac-19;F39B2.8;F40G12.11;F44F1.4;hecw-1;fbxa-134;F49C12.9;F53B6.7;F56D5.9;rde-12;set-14;T28C6.7;T28D6.5;W02B8.2;dkf-1;Y6D1A.2;nmy-3;fbxa-107;Y38H6C…
21ur-4196	21ur-4196	1.05799	9.25138	0.00274205	0.0698476	2.0831396222464 ± 0.47079633788648	IV	15365491	15365511	+	21ur-4196	syx-5;C27D8.3;Y38H6C.8
21ur-925	21ur-925	1.1377	6.81937	0.00274388	0.0698476	2.19751375338671 ± 0.519961600274897	IV	14972386	14972406	-	21ur-925	pros-1;fkb-6;gcy-27;gpa-11;srw-36;twk-36;C05C9.1;D1025.1;glb-22;Y44A6C.1;eipr-1;srt-22;acs-22;pals-34;ugt-61;T06C10.3
21ur-5377	21ur-5377	1.1377	6.81937	0.00274413	0.0698476	2.19751375338671 ± 0.519961600274897	IV	14972383	14972403	-	21ur-5377	C05C9.1;acd-3;best-8;cutl-17;T06C12.9;B0511.12;best-6
21ur-4765	21ur-4765	1.05799	9.25138	0.00274459	0.0698476	2.0831396222464 ± 0.47079633788648	IV	15365487	15365507	+	21ur-4765	NA	NA
21ur-4181	21ur-4181	1.32391	4.87199	0.00274928	0.0698476	2.53306525873462 ± 0.576243594815311	IV	5417466	5417486	-	21ur-4181	dao-3;gld-2;ins-31;klp-6;ncr-2;ndx-8;plx-2;sbp-1;vps-35;fbxa-176;D2030.2;fbxa-44;srz-6;cyp-34A8;C06E1.11;dop-6;clec-5;ubr-4;F58H7.5;K03H6.5;M60.7;srt-18;T01C8.3;epg-7;T09D3.3;ogdh-1;Y66H1A.4;irld-63;ZK721.3;fbxa-42;B0511.19
21ur-14323	21ur-14323	-1.68714	3.54816	0.0027549	0.0698476	0.31720524055652 ± 0.093002075845287	IV	5908512	5908532	+	21ur-14323	klp-17;Y14H12B.2
21ur-7783	21ur-7783	-1.68713	3.54816	0.00275772	0.0698476	0.31720524055652 ± 0.093002075845287	IV	5908493	5908513	+	21ur-7783	grl-1;pmp-5;sra-3;srd-64;srh-1;tbx-39;abts-2;cbd-1;oac-37;R10E8.6;T01D3.1;W01F3.2;Y40B1A.3;Y50E8A.6;Y53C10A.6;C02B8.3;F25G6.8;F41H10.12;Y53G8AR.9
21ur-4370	21ur-4370	1.09091	5.10095	0.00275908	0.0698476	2.14154042653361 ± 0.266785622692322	IV	14042462	14042482	-	21ur-4370	pqn-84;rme-2;C23H4.6;C25F9.5;C38D4.9;rskn-1;mrps-9;egg-5;egg-4;ZK484.7	rme-2;rskn-1
21ur-12903	21ur-12903	1.09091	5.10095	0.0027648	0.0698476	2.14154042653361 ± 0.266785622692322	IV	14042460	14042480	-	21ur-12903	crb-1;gpa-11;nhr-21;C25F9.5;F55C10.4;lpr-2;T21E8.4;atln-2;C13A2.1;irld-42;R02E12.4;Y40C7B.3;irld-12
21ur-462	21ur-462	1.09091	5.10095	0.00276724	0.0698476	2.14154042653361 ± 0.266785622692322	IV	14042459	14042479	-	21ur-462	cut-1;dpf-5;dpy-27;hsp-43;msh-6;nmy-2;odr-4;plc-3;prpf-4;ret-1;snf-2;unc-33;mdt-27;B0564.2;alkb-8;C14C10.5;C39E9.7;F21H7.2;F57G8.7;gsnl-1;K10D11.4;ctc-3;R05D11.5;nphp-4;T07D4.2;T28A8.3;mltn-11;fcd-2;hrpu-1;Y53C12B.1;ZK829.3;inst-1;F20B6.5;stn-2;R07E4.1;immt-1;Y41D4B.4;ZK177.2;fbn-1;F59E12.15;crb-1;cul-1;nhr-21;srh-279;unc-22;C25F9.5;ntr-2;atln-2;C13A2.1;C49A9.3;H20J04.1;C25E10.13
21ur-3532	21ur-3532	1.26822	5.65039	0.00282904	0.0707576	2.42402151303296 ± 0.496833509593589	IV	15192977	15192997	-	21ur-3532	frm-2;gcy-1;gcy-2;lam-3;lgg-3;mec-6;mom-1;paf-1;pqn-80;ptr-3;rec-8;srh-133;srh-295;sri-42;srw-73;xnp-1;chil-2;chil-8;gadr-2;C35A5.8;din-1;rtcb-1;F46C5.6;F59F5.7;chil-13;chil-18;bgnt-1.7;T25B9.1;ZK669.3;C31H1.5;C32D5.7;pks-1;met-1;C48B6.3;cdh-8;F19C7.3;nep-15;irld-13;fbxc-33;T13G4.4;irld-1;T08G11.2;fkh-9;gcy-13;mlh-1;plx-1;rsd-6;srv-14;srx-1;srx-101;vha-3;tufm-1;C05C10.7;oac-5;D1046.2;F13B12.3;F19…	F52B5.3
21ur-9363	21ur-9363	1.26822	5.65039	0.00283203	0.0707576	2.42402151303296 ± 0.496833509593589	IV	15192976	15192996	-	21ur-9363	ced-10;gcy-13;haf-1;lin-49;plx-1;spe-15;D1046.2;ent-6;phlp-2;H40L08.1;T05C12.11;T06D8.2;W03C9.5;ash-2;Y26G10.1;pro-3;ttm-1;Y39E4B.6;clec-194;misc-1;C17F4.7;C54E4.4;tag-304;F54D12.7;F55G1.15;K09D9.9;R07E4.1;fbxb-82;Y55F3BR.6;hrpu-2;ZC449.4;F26F2.8;ZK813.6
21ur-1264	21ur-1264	1.52448	4.24321	0.00289644	0.071964	2.81325482666779 ± 0.167781425283332	IV	16547563	16547583	+	21ur-1264	skih-2;fhod-1;che-10;AC3.12
21ur-1477	21ur-1477	-1.29786	3.82895	0.00292356	0.072133	0.372270906609912 ± 0.113119826787755	IV	14036297	14036317	-	21ur-1477	mup-4;sym-4;F26C11.3;enol-1;acr-24;K07E8.6;Y49G5B.1;mrt-1
21ur-1095	21ur-1095	-1.2979	3.82895	0.00292916	0.072133	0.372270906609912 ± 0.113119826787755	IV	14036296	14036316	-	21ur-1095	dpf-7;sym-4;F17H10.2;F26C11.3;F44D12.2;W04E12.7;dagl-2;K07E8.6
21ur-5764	21ur-5764	1.89859	3.31167	0.00295548	0.072133	3.860719017199 ± 0.560108208808463	IV	14495188	14495208	-	21ur-5764	gei-4;ebax-1;srg-55;C26D10.6;W04A8.1;sre-16;efa-6;ZK1058.3;anat-1;C44B7.7;K09F5.1;R05G6.9;Y53F4B.62
21ur-4272	21ur-4272	1.89861	3.31167	0.0029582	0.072133	3.860719017199 ± 0.560108208808463	IV	14495189	14495209	-	21ur-4272	clk-1;fbl-1;ebax-1;srg-55;unc-112;F14F7.5;clec-24;ttr-50;ippk-1;atln-2;B0507.6;C09D4.4;anat-1;C44B7.7;ceh-82;R05G6.9;ugt-31;Y42H9B.3
21ur-3633	21ur-3633	-2.29489	2.72979	0.00299687	0.0725125	0.198071508873695 ± 0.031847467819072	IV	14006320	14006340	-	21ur-3633	rab-30;unc-89;K08E7.5;K08E7.8;fbxc-40;C56G2.3;F32A5.3;baz-2
21ur-7835	21ur-7835	-1.1449	4.61351	0.00304213	0.0734476	0.45840405657553 ± 0.0729415575564577	IV	16772095	16772115	-	21ur-7835	col-7;col-62;T09B9.5;T27A8.5;C38C3.3;cnep-1;C30G7.3
21ur-9953	21ur-9953	4.90171	2.32895	0.00309101	0.0743046	Inf ± NaN	IV	5736377	5736397	-	21ur-9953	cal-1;fer-1;fmo-3;gro-1;lin-18;lir-2;lpd-3;mxl-2;nrf-5;unc-31;C05C12.1;apc-17;mma-1;F08G12.3;F19B2.7;F45D3.3;smc-6;Y39B6A.27;Y39B6A.43;afmd-2;Y113G7A.12;smc-5;zgpa-1;cyp-33C1;F07F6.8;nep-6;cir-1;F57C9.4;R05G9R.1;nuo-2;W03G9.5;W10C8.4;thoc-5;Y39A3A.4;clec-205;ZK402.1;C04A2.15
21ur-54	21ur-54	1.27237	5.3088	0.00310854	0.0745646	2.46568397899517 ± 0.146831703145731	IV	15904913	15904933	+	21ur-54	fmo-2;mig-22;pqn-87;sel-5;tlk-1;twk-22;C53D6.4;F49C12.4;T21B10.3;Y38H6A.3;Y67A10A.9;Y75B8A.7;imp-3;vpr-1;cbn-1;bris-1;W03G9.5;Y55F3BR.6;Y97E10AR.3;C23H4.8;F53G2.2
21ur-12148	21ur-12148	1.11589	4.93873	0.0032097	0.0755602	2.12893784999288 ± 0.199045782925468	IV	15174209	15174229	-	21ur-12148	imb-1;mpz-1;rha-1;spp-16;srw-77;emre-1;F52G2.3;K01D12.7;lsd-1;ekl-6;T28F3.5;Y57G11C.6;Y105C5B.18;tep-1;C24D10.1;F18A1.1;F23C8.5;nstp-8;lgl-1;F53F10.8;Y49E10.29
21ur-5586	21ur-5586	1.11588	4.93873	0.00321122	0.0755602	2.12893784999288 ± 0.199045782925468	IV	15174208	15174228	-	21ur-5586	dic-1;rha-1;spp-16;srw-77;clec-109;emre-1;ekl-1;F53C11.4;spat-1;rga-5;K01D12.7;mrps-34;Y57G11C.6;tep-1;C01B7.7;C24D10.1;npr-35;F07B7.13;ugtp-1;Y49E10.29
21ur-817	21ur-817	-1.02607	5.68094	0.00330567	0.0773013	0.488201183358159 ± 0.0175278038001127	IV	14897227	14897247	-	21ur-817	amt-2;nhr-126;plc-3;sma-9;B0379.2;cpsf-3;zeel-1;ZC21.6
21ur-6531	21ur-6531	-1.97938	2.97062	0.00333311	0.0774425	0.2088720255468 ± 0.0939228565153763	IV	6876511	6876531	-	21ur-6531	myo-2;nex-3;tbc-7;erp-44.3;myo-5
21ur-10700	21ur-10700	-1.08996	5.99145	0.00336786	0.077972	0.467734550375119 ± 0.0276939731108591	IV	15548862	15548882	+	21ur-10700	aex-5;dpy-21;dys-1;nhr-71;ptr-14;F36G3.1;F49C12.15;M28.2;ztf-6;gcl-1;B0361.3;C23H3.9;F59B1.8;F59B1.10;Y48G8AL.5;nol-6;eel-1
21ur-12063	21ur-12063	1.09665	5.96037	0.00339958	0.0781711	2.15779087466828 ± 0.400052386515736	IV	16043482	16043502	-	21ur-12063	bli-3;wrn-1;oac-3;Y7A5A.1;duox-2;elpc-1
21ur-1437	21ur-1437	1.09665	5.96037	0.00340355	0.0781711	2.15779087466828 ± 0.400052386515736	IV	16043481	16043501	-	21ur-1437	tim-1;glb-13;F49C12.4;nphp-4;dmd-3;Y81G3A.4;ZK228.3;oac-2;C23H5.15;T01H10.11;eif-2A;clec-224	eif-2A
21ur-15623	21ur-15623	2.86969	2.48739	0.00344447	0.0781711	10.1888070088296 ± 0.597141111788979	IV	14975753	14975773	-	21ur-15623	grk-1;parg-1;sqv-5;srb-7;unc-14;R11.4;T24B8.7;cra-1;W09C3.8
21ur-2416	21ur-2416	2.86969	2.48739	0.00344447	0.0781711	10.1888070088296 ± 0.597141111788979	IV	14975754	14975774	-	21ur-2416	grk-1;mcm-6;parg-1;pyc-1;srh-146;magu-4;F52H2.4;cra-1;T04G9.4	mcm-6
21ur-1686	21ur-1686	2.23767	3.26624	0.00346423	0.0781711	5.63356462653484 ± 1.52426633440782	IV	14932050	14932070	+	21ur-1686	cua-1;dhs-22;gly-20;srg-48;C06C6.7;ugt-34;T24B8.7;Y73B3A.20
21ur-7292	21ur-7292	-1.10011	6.65918	0.00346962	0.0781711	0.463559409342897 ± 0.0701534908317891	IV	14582601	14582621	+	21ur-7292	ctl-1;ctl-3;bath-3;C17E4.20;cars-1;gpa-6;grd-4;ntl-2;ketn-1;sma-1;sri-50;unc-86;D2045.2;F33E11.3;F37A4.1
21ur-5840	21ur-5840	1.89369	3.29775	0.00349221	0.078511	4.02487773457025 ± 0.317727700825665	IV	15695453	15695473	-	21ur-5840	abt-2;asp-2;bre-3;cof-2;del-1;flr-4;lin-37;nhr-98;nhr-123;ora-1;str-28;str-84;tax-2;B0250.8;C05C12.1;stip-1;C08B6.10;mltn-12;H05L14.1;M05B5.4;ugt-55;sptl-3;rlbp-1;T24D5.2;T25B9.9;irld-56;Y37H9A.3;spat-2;acr-24;C08A9.6;C56G2.15;D2024.1;afmd-1;DC2.5;E04F6.15;F32A5.8;tbc-11;F42C5.3;K05F1.9;R05D3.12;T15B12.2;Y18H1A.1;fln-1;ZK402.1
21ur-9639	21ur-9639	1.79779	3.41952	0.00357057	0.0801106	3.85252420281725 ± 0.6461498679035	IV	5599829	5599849	-	21ur-9639	par-3;sra-14;dcn-1;C16E9.2;srab-9;C48E7.6
21ur-4757	21ur-4757	1.22522	4.79427	0.00359248	0.0802778	2.34723164612438 ± 0.188314962234604	IV	13727384	13727404	-	21ur-4757	nhr-97;srd-1;C18E9.7;nhr-199;gana-1;ZC376.6;ZK1037.6;osta-1;F16B4.5;F42C5.9;F49F1.9;K02F6.3;M03D4.4;Y47G6A.25;Y50D7A.3;Y54E10BR.4;F08A8.8;ptr-11;F54F11.1;fbxa-127;cas-2;fil-2;Y65B4A.4;nep-25
21ur-3084	21ur-3084	-1.22457	4.28059	0.0037064	0.0823265	0.427209686090966 ± 0.033724341528757	IV	14343241	14343261	-	21ur-3084	cca-1;ina-1;sdc-2;tag-65;unc-68;C38C6.3;F35G2.3;K08H2.3;vap-2;hrpu-1;C18H2.1;pks-1;F27D9.4;vps-41;F38A5.6;R05D3.2;T12A2.1;Y14H12B.2;dpm-1;npp-6;tufm-2;R04B3.1;sav-1
21ur-10722	21ur-10722	-1.93888	2.97966	0.00382955	0.0832729	0.242241135772984 ± 0.0129304983403558	IV	5320693	5320713	-	21ur-10722	eat-2;glb-12;cyp-37A1;F11D5.1;T06A4.3;T27C4.1
21ur-2823	21ur-2823	1.00824	6.22105	0.00383545	0.0832729	1.99549452016063 ± 0.424312887455883	IV	14315333	14315353	+	21ur-2823	fmo-2;frm-9;kin-18;ntl-4;C23H4.4;C49A1.5;slc-25A29;prmn-1;piki-1;gpap-1;tat-1;Y54E2A.4;Y111B2A.3;clec-58;ZK809.5;ZK945.4;F21C10.7;flcn-1;F35D11.3;frl-1;lfi-1;npp-13;clec-166;M02B1.3;M03B6.3;asp-18;tald-1;cct-8
21ur-13095	21ur-13095	1.00823	6.22105	0.00383945	0.0832729	1.99549452016063 ± 0.424312887455883	IV	14315329	14315349	+	21ur-13095	pgp-13;ulp-4;hinf-1;T28C6.7;F42C5.5;W07E6.3
21ur-6507	21ur-6507	-1.00601	5.35592	0.00384045	0.0832729	0.506916638030184 ± 0.0720590821759941	IV	17231212	17231232	-	21ur-6507	F46B6.9;oac-56
21ur-15348	21ur-15348	-1.00599	5.35592	0.00384648	0.0832729	0.506916638030184 ± 0.0720590821759941	IV	17231208	17231228	-	21ur-15348	NA	NA
21ur-14430	21ur-14430	-1.04016	6.68838	0.00397774	0.085297	0.488105572801983 ± 0.0664513047075877	IV	16082674	16082694	+	21ur-14430	inx-15;pus-1;jmjd-1.1;unc-39;BE10.3;gck-4;C17G1.2;kbrl-1;acaa-2;F59F5.5;T16G1.9;pptr-1;B0280.11;C13A10.2;mth-1;swsn-3
21ur-6811	21ur-6811	-1.04015	6.68838	0.00397838	0.085297	0.488105572801983 ± 0.0664513047075877	IV	16082679	16082699	+	21ur-6811	frm-9;hlh-2;F11E6.3;F19C6.2;R10E11.5;C53B7.6;F27C1.11;irg-7;F55F10.1;sre-40;fbxa-54;T25F10.3
21ur-1387	21ur-1387	-1.32762	3.97321	0.00401771	0.0853168	0.387715107260671 ± 0.0469437575128831	IV	15394410	15394430	-	21ur-1387	unc-55;K08D8.1;W04G5.4;Y53C12B.1
21ur-6814	21ur-6814	1.62428	3.61466	0.00405015	0.0858414	3.30458012791742 ± 0.606713667981086	IV	16720897	16720917	-	21ur-6814	sym-2;K10C3.5;npr-22
21ur-4193	21ur-4193	-2.32731	2.73859	0.00406404	0.0859718	0.186046645042886 ± 0.0585620605792956	IV	16211364	16211384	+	21ur-4193	C40H5.7
21ur-2150	21ur-2150	4.70324	2.23144	0.00409285	0.0861714	Inf ± NaN	IV	15680096	15680116	+	21ur-2150	cept-1;Y70G10A.3;F46C8.3;nhr-186;K07E3.9;srh-72;tab-1;anp-1;nhr-288;ZK1053.6;vps-22;K08D9.4
21ur-12605	21ur-12605	1.58365	3.71754	0.00409363	0.0861714	3.12552670440962 ± 0.323048341291977	IV	5019469	5019489	+	21ur-12605	dcp-66;srw-115;srw-124;tps-2;unc-68;D1081.7;gpdh-1;pot-2;nduo-3;sulp-7;Y53H1C.3;Y54E5A.7;nrps-1;Y87G2A.16;soap-1;ddr-1;vha-16;F07E5.8;F13C5.2;cee-1;F28A10.5;K09E2.1;clec-175;W03F9.9;clec-123;ttc-37;Y54E10A.11;npr-5;ZK381.8;R05C11.4
21ur-566	21ur-566	4.6979	2.21395	0.00410451	0.0861714	Inf ± NaN	IV	17030222	17030242	+	21ur-566	alh-7;aph-1;cam-1;cdl-1;gar-2;nrde-4;hsp-43;kin-20;lec-4;lin-2;srd-12;srj-10;srj-50;lim-9;unc-26;wsp-1;zig-6;C03A3.1;C25F9.9;C35C5.10;saps-1;rskn-2;F07C6.4;ensa-1;M01E5.3;pde-2;coa-4;B0511.12;mai-2;C06G1.1;C53D5.1;F18E9.3;F31A3.5;F40H3.3;sumv-2;pup-2;R01B10.4;C16A11.10;M04C3.5;col-110;cux-7;npp-3;unc-68;wnk-1;seb-3;C36B1.9;K10G4.5;M28.9;W06D11.3;Y54G11A.4;Y54G11A.7;Y56A3A.7;Y116A8C.11;nhr-229;mrp…
21ur-8302	21ur-8302	1.71112	3.53221	0.00413012	0.0862824	3.26688556441321 ± 0.20407144169828	IV	16508518	16508538	+	21ur-8302	bmk-1;coq-2;gei-8;gpa-12;hog-1;lig-4;plx-1;ptr-15;sma-1;spl-1;tbx-35;tir-1;twk-24;unc-82;unc-116;wrm-1;yars-2;nfx-1;C18B12.6;cyp-36A1;C51E3.6;scav-4;F28C1.1;F28H6.4;evl-18;F46C5.9;H05L14.2;T21C9.6;T22C1.11;clec-29;W06F12.2;sws-1;Y45F10C.1;Y48G10A.2;prp-6;epg-8;ZC374.2;ZK673.2;cas-2;F02E8.4;fbxa-53;F09E5.11;F14D2.8;cutl-28;F41H10.2;F53E10.5;pmt-2;aman-1;H27M09.5;R05C11.2;tfbm-1;T20B12.4;W02D7.6;Y3…
21ur-7081	21ur-7081	1.11754	6.18957	0.00415111	0.0862824	2.17417068769441 ± 0.621494351366595	IV	15909473	15909493	-	21ur-7081	daf-3;dpf-1;gcy-5;grd-11;ifc-2;kin-29;mat-2;mup-4;nmy-1;pcp-2;ran-2;sqv-1;sri-21;vps-34;F26F2.3;F38B2.3;ddx-17;M153.3;R06F6.8;T05F1.2;prmt-9;npr-34;Y64G10A.7;lgc-37;ZK673.2;mvb-12;C56G2.3;F23C8.3;F35C8.5;F53C3.1;F56C9.6;H11E01.2;fbxa-54;Y32H12A.7;Y41D4A.6;Y48G1C.5;dnc-6;bus-1	daf-3;mat-2
21ur-12189	21ur-12189	1.11754	6.18957	0.00415641	0.0862824	2.17417068769441 ± 0.621494351366595	IV	15909472	15909492	-	21ur-12189	daf-3;gcy-1;gcy-2;gcy-3;gcy-5;gcy-9;him-1;mat-2;mup-4;nhr-20;nhr-91;nhr-104;pcp-2;pgp-4;pkc-3;ran-2;rnp-2;sqv-1;srh-231;sri-21;unc-79;unc-89;unc-101;vab-19;vps-34;pbrm-1;glb-8;hrdl-1;F38B2.3;F45D3.1;madd-4;F58E6.6;ddx-17;H03A11.1;M153.3;prmt-9;Y64G10A.7;lron-12;lgc-37;sulp-8;cyp-34A8;orai-1;C18F10.7;F13C5.2;F35C8.5;F53C3.1;F56C9.6;F57C9.4;ddl-1;ani-2;rbm-5;W03G9.5;Y32H12A.7;aakg-3;Y48G1C.5;dnc-6
21ur-7340	21ur-7340	-1.03924	4.96524	0.00417824	0.0865738	0.492767416747734 ± 0.0209975403191753	IV	14962289	14962309	+	21ur-7340	grl-14;F41H10.4
21ur-12821	21ur-12821	-2.28183	2.52124	0.00422016	0.0867947	0.149040850986766 ± 0.0940449462866734	IV	9434499	9434519	-	21ur-12821	arx-2;cps-6;cux-7;dat-1;del-1;parg-1;pqn-15;rbr-2;sra-4;str-168;sur-2;mdt-10;folt-1;nhr-154;F10C2.4;F15D4.5;F19B2.5;F19B2.6;F22B3.8;F22G12.5;F55A11.1;xdh-1;T25B9.9;Y53F4B.10;Y67A10A.9;elpc-2;ZK829.9;ZK909.6;B0495.8;C24A1.3;srab-6;C45G9.6;cebp-1;F35B3.7;pst-2;ddx-15;F57B9.8;irld-40;fbxa-67;Y53G8B.2
21ur-7260	21ur-7260	-1.64678	3.821	0.00424628	0.087112	0.305687775875706 ± 0.18758241787133	IV	15430052	15430072	+	21ur-7260	cdf-1;dis-3;dpy-7;mom-5;mua-3;nas-38;nhr-38;sel-5;glod-4;ubh-2;syx-7;clec-32;T06C12.11;T09B9.3;C25E10.10;symk-1;dhhc-3;T24G10.2;Y39F10B.1;comt-3;tyr-5;hpo-39;ZK112.4;C27F2.9	glod-4
21ur-7559	21ur-7559	4.70055	2.22403	0.00425128	0.087112	Inf ± NaN	IV	5134727	5134747	-	21ur-7559	ced-10;nos-2;plx-1;tsp-9;wnk-1;zig-3;rei-1;F32H2.8;F33H2.8;F49E2.2;enu-3.1;M04C3.1;kmo-2;T10B10.3;Y6G8.2;Y17G7B.3;math-3;C27D6.3;C27H5.4;C31B8.9;adss-1;hpo-12;C50E3.13;math-26;math-27;F40G9.5;fbxb-44;acl-14;K12H4.4;T19D12.1;T19D12.2;Y48G9A.6;set-27;shl-1;Y73C8C.8;Y43F8B.23;C17B7.15
21ur-849	21ur-849	1.09272	6.43454	0.00436914	0.0882472	2.14172833355453 ± 0.443175654318312	IV	16540137	16540157	+	21ur-849	dop-1;mab-5;mec-6;mrp-8;nlp-18;srd-21;C04H5.7;dph-1;F23A7.5;F38A6.4;K10D11.4;K11H3.3;T13H5.1;srxa-15;csnk-1;C17E7.4;hecd-1;F54D7.2;hot-8;hgap-1;Y59E9AL.4;srt-53;ZK6.11;F23F12.13;Y54G2A.50;R13A5.15
21ur-9631	21ur-9631	-1.45881	3.30546	0.00437819	0.0882472	0.328149924060319 ± 0.0726827155258952	IV	7534697	7534717	+	21ur-9631	ckc-1;clp-2;col-9;dna-2;glr-6;hst-3.1;kin-20;let-23;let-858;mtm-5;ppk-1;pqn-15;pqn-84;rgs-11;rom-4;rsp-3;srj-8;srr-4;sru-6;ulp-5;unc-43;pals-5;C33G3.5;com-1;etc-1;F01G10.5;chw-1;ubr-5;ttc-36;klf-2;copz-1;K01D12.6;R11D1.2;R74.2;ttr-14;Y6B3B.1;Y39E4B.10;Y62F5A.10;Y71A12B.12;ZK899.2;ZK970.7;cdk-11.1;B0507.8;lmp-2;C06A5.6;spas-1;hsp-110;pks-1;cnnm-1;cla-1;M60.4;T03F1.11;attf-5;T07D3.4;math-38;algn-1;…
21ur-7317	21ur-7317	-3.30915	2.10129	0.00441607	0.0883735	0.069272822016824 ± 0.0655348707240714	IV	6058040	6058060	-	21ur-7317	ced-10;csp-3;pqn-27;pqn-39;sel-2;srg-30;ulp-1;unc-70;rad-26;F40F11.4;T13F2.4;W04G5.4;ZK899.5;C04F1.1;C31B8.1;C32D5.11;C45B2.6;sdz-11;Y42G9A.1
21ur-8836	21ur-8836	1.21774	4.51075	0.00441987	0.0883735	2.41082419935562 ± 0.468884042280273	IV	15610509	15610529	-	21ur-8836	cnk-1;rbr-2;snf-2;srw-85;T02G6.7;Y49E10.21;cyp-34A9;cyp-34A10;nol-2;herc-1;Y110A7A.9
21ur-4906	21ur-4906	1.21776	4.51075	0.00442425	0.0883735	2.41082419935562 ± 0.468884042280273	IV	15610508	15610528	-	21ur-4906	cnk-1;npr-2;oct-2;snf-2;T02G6.7
21ur-4939	21ur-4939	-1.87939	3.26256	0.00448455	0.0890973	0.252043964777272 ± 0.0395037280847068	IV	15619732	15619752	-	21ur-4939	ula-1;F09E10.7
21ur-4916	21ur-4916	1.29456	4.95543	0.0046088	0.0900453	2.46703923599102 ± 0.501284764666201	IV	14879477	14879497	-	21ur-4916	nca-2;T09F3.5
21ur-11414	21ur-11414	1.29202	4.12747	0.00470963	0.0900453	2.51219520242671 ± 0.308575481533199	IV	13894749	13894769	+	21ur-11414	K02B12.5;Y46G5A.18;M04D5.1;C18H7.1;drl-1;npr-30;Y59E9AL.8
21ur-12937	21ur-12937	1.05412	5.62804	0.00471726	0.0900453	2.10481139830448 ± 0.285335095429911	I	7279603	7279623	-	21ur-12937	elo-7;rpl-11.2;F36G9.13;C06G1.2;lgc-54;cus-2
21ur-3588	21ur-3588	1.29203	4.12747	0.00472276	0.0900453	2.51219520242671 ± 0.308575481533199	IV	13894750	13894770	+	21ur-3588	elp-1;npp-7;unc-93;C46F11.6;ppfr-1;F28C1.3;Y46G5A.18;egas-1;C17C3.1;cdgs-1;F16F9.4;drl-1;stt-3;ZK993.2
21ur-8949	21ur-8949	1.09761	4.87018	0.0047273	0.0900453	2.12117647030944 ± 0.321204240663839	IV	16028759	16028779	+	21ur-8949	F38A1.6;swan-1;asah-1;C55C3.4;K09E2.3;Y67D8C.2;fbxb-33;T01D1.8
21ur-8216	21ur-8216	1.0976	4.87018	0.00473129	0.0900453	2.12117647030944 ± 0.321204240663839	IV	16028760	16028780	+	21ur-8216	pab-1;F38A1.6;clec-161;asah-1;Y45G5AM.3;fbxb-33;T01D1.8
21ur-6308	21ur-6308	1.0976	4.87018	0.00473559	0.0900453	2.12117647030944 ± 0.321204240663839	IV	16028763	16028783	+	21ur-6308	NA	NA
21ur-6969	21ur-6969	1.56239	3.71595	0.00474111	0.0900453	2.89308672440479 ± 0.375238757463691	IV	5965887	5965907	+	21ur-6969	hum-2;mup-4;srx-86;C43F9.4;din-1;zim-2;jmjd-2;eipr-1;Y106G6G.4;B0228.7;C33F10.4;pks-1;D1007.10;F14D2.7;F31E3.2;F52C9.5;T04G9.7;T15B7.14;fbxa-20;ZC239.6;K09D9.14
21ur-15352	21ur-15352	1.56239	3.71595	0.0047422	0.0900453	2.89308672440479 ± 0.375238757463691	IV	5965884	5965904	+	21ur-15352	frm-9;lad-2;nas-39;ttn-1;tbx-37;xpa-1;clec-151;F11E6.8;erp-44.2;C06E2.5;F19B10.4;F19G12.2;F42A10.7;Y73C8C.8;mrps-30
21ur-2574	21ur-2574	1.092	5.15042	0.00477343	0.0900453	2.12359188999209 ± 0.302733730554525	IV	16126948	16126968	+	21ur-2574	gbh-2;glb-18;R10H10.3;rev-1;faah-1;C30G12.3;npr-35;mth-1;H31G24.3;R11F4.3;T02B11.8
21ur-14959	21ur-14959	-1.15885	4.66355	0.00478817	0.0900453	0.467534818954226 ± 0.109649610441925	IV	5822650	5822670	-	21ur-14959	hrde-4
21ur-987	21ur-987	-1.15884	4.66355	0.00479123	0.0900453	0.467534818954226 ± 0.109649610441925	IV	5822655	5822675	-	21ur-987	gcy-27;gop-2;mec-1;mix-1;mog-4;syd-2;C08F11.3;C17E4.1;ugt-15;E04D5.2;cup-15;M199.7;R11D1.2;ssu-1;Y116A8C.9;nhr-141;F48E8.4;R01B10.6;W01A11.1;Y53G8B.2;madf-1;sdz-34;acl-9;fbxb-87
21ur-8308	21ur-8308	4.79574	2.26777	0.00480898	0.0900873	Inf ± NaN	IV	16450189	16450209	+	21ur-8308	alg-1;nhr-130;tag-77;srz-1;pck-2;tbc-9;Y66D12A.13;F26F4.12;F48B9.8;F59B1.6;athp-2;T11F8.12
21ur-3763	21ur-3763	4.79572	2.26777	0.00481017	0.0900873	Inf ± NaN	IV	16450186	16450206	+	21ur-3763	ajm-1;apx-1;ceh-44;cnt-1;cyn-2;dim-1;dpy-21;dur-1;dyf-11;dys-1;fkh-9;gld-3;glt-3;him-4;imb-2;klp-12;lea-1;ect-2;lpr-1;lgg-1;nab-1;nas-10;nhx-8;pop-1;prp-8;pxn-1;rcq-5;ret-1;rgs-3;sop-3;spc-1;tph-1;twk-35;unc-44;unc-85;unc-89;pals-5;pals-38;E01G6.3;F09C6.1;F11F1.1;ncs-4;exos-7;F43G9.4;ipla-2;F47B8.5;F56A12.2;rde-12;rga-5;H40L08.1;K01G12.3;M88.3;R07E3.6;snfc-5;T01B7.5;rmd-1;gcc-2;T24B8.7;syx-17;mlt…
21ur-4821	21ur-4821	1.51148	3.91724	0.00483662	0.0902153	2.79622237365351 ± 0.420235509475406	IV	14333900	14333920	-	21ur-4821	dpf-1;efl-1;hum-2;hum-7;mkk-4;npp-8;unc-26;vps-34;F36A2.2;cyld-1;R07E5.17;sna-2;T16G12.7;lnkn-1;sulp-3;H09G03.1;K10B4.1;D1086.10;Y62H9A.15
21ur-11915	21ur-11915	1.51146	3.91724	0.00484138	0.0902153	2.79622237365351 ± 0.420235509475406	IV	14333897	14333917	-	21ur-11915	lrp-1;nhr-19;pgp-4;pgp-14;ptr-5;rps-4;srg-62;srx-98;unc-26;eif-2Bepsilon;F11F1.1;K07C5.2;T21C9.6;sre-20;clec-208;math-28;sulp-3;F42G9.1;srbc-40;K06H6.2;K11G12.6;K12H4.3;M02D8.3;T19A5.1;ZK867.2;Y51A2B.16
21ur-7389	21ur-7389	1.9633	3.55138	0.00490456	0.0910869	4.08405377443713 ± 0.828375568691345	IV	16982478	16982498	-	21ur-7389	cnt-2;hch-1;pgp-2;unc-2;F11F1.4;F14B6.3;mam-3;ggtb-1;soap-1;fnta-1;cblc-1;ZK1290.7;T06D4.6
21ur-8828	21ur-8828	4.71694	2.23665	0.00493384	0.0914727	Inf ± NaN	IV	5888160	5888180	-	21ur-8828	apm-1;dnj-20;ify-1;let-418;lig-4;syg-2;ugt-15;F13B12.3;H12D21.10;K10G4.5;M05D6.5;T04F3.1;nstp-9;T23G7.3;W07G4.2;M04D5.1;srab-9;C48B6.4;F07G6.3;F32B5.3;marc-6;K09C4.1;npp-26;Y59H11AR.4;pcp-5;tag-241;C55C3.8;che-13;C23H4.3;nhr-208
21ur-1665	21ur-1665	1.63578	3.45341	0.0049418	0.0914727	3.56910394314618 ± 0.803036705205305	IV	15054811	15054831	-	21ur-1665	srh-23;str-25;pad-2;klo-2;F16B4.2;tag-343;F57H12.5;athp-2;abtm-1;ZC449.7;T10C6.15;dhs-27;npp-10;pqe-1;ptr-20;aspm-1;mans-1;fbxa-108;gpcp-2;vps-39;F41H10.3;F53F10.2;F59A3.7;W03D8.2
21ur-11534	21ur-11534	-4.98235	2.04369	0.00500359	0.0920338	0 ± 0	IV	5570638	5570658	-	21ur-11534	ooc-3;C08B6.5;algn-2;slc-17.8
21ur-8072	21ur-8072	-4.98238	2.04369	0.0050074	0.0920338	0 ± 0	IV	5570635	5570655	-	21ur-8072	che-14;fkh-5;mboa-7;fbxb-101;ceh-84;K04C2.2;iglr-2
21ur-5846	21ur-5846	1.19424	4.83575	0.00501355	0.0920338	2.2326488674605 ± 0.305059478951362	IV	15372284	15372304	+	21ur-5846	adm-4;hsp-70;rpc-1;str-44;C54G4.9;T23G5.2;utx-1;F25D1.8
21ur-5399	21ur-5399	-1.63902	4.1218	0.00504265	0.0923086	0.325387643572729 ± 0.083160271886493	IV	13633693	13633713	-	21ur-5399	hst-2;kin-20;pbs-7;wrt-4;F02E9.7;rga-5;T25C8.1;nep-1;pifk-1;Y22D7AR.7;Y71H2AM.15
21ur-7230	21ur-7230	-1.16549	5.01482	0.00506176	0.0923086	0.446781754705875 ± 0.14298599300347	IV	16795856	16795876	+	21ur-7230	NA	NA
21ur-14778	21ur-14778	1.57829	3.58591	0.00515621	0.0929625	3.16967908738622 ± 0.546280472323861	IV	16720913	16720933	-	21ur-14778	cdh-3;daf-16;unc-80;smgl-1;scl-3;K05C4.5;R10E4.11;ZK1025.4;cdk-11.1;glo-4;cyp-33C5;srb-12;catp-7;Y65B4A.8;D1086.17;nipi-4
21ur-4414	21ur-4414	2.18645	2.98248	0.00531001	0.0952714	4.98444101101096 ± 0.36023423279248	IV	15858847	15858867	-	21ur-4414	dat-1;die-1;gfl-1;plc-1;ppw-1;tsn-1;cpna-3;C27A7.1;C53A5.9;T16G12.6;W05B2.2;Y39E4B.10;Y53F4B.18;ZK287.4;sago-2;M01H9.3
21ur-6252	21ur-6252	1.41243	4.03173	0.0053676	0.0954157	2.76082769474263 ± 0.439510919907718	IV	16363876	16363896	-	21ur-6252	Y116A8C.13;F38A5.2
21ur-12845	21ur-12845	-1.24284	4.8909	0.00537231	0.0954157	0.428901582577243 ± 0.0590638205476823	IV	16781725	16781745	-	21ur-12845	parp-1;fbxb-60
21ur-5819	21ur-5819	-1.24283	4.8909	0.00537607	0.0954157	0.428901582577243 ± 0.0590638205476823	IV	16781724	16781744	-	21ur-5819	R13D11.3
21ur-13365	21ur-13365	-1.24282	4.8909	0.00537903	0.0954157	0.428901582577243 ± 0.0590638205476823	IV	16781721	16781741	-	21ur-13365	sri-30;B0393.3;rbm-5
21ur-5475	21ur-5475	1.52652	3.83665	0.00540715	0.0954157	2.85586311184648 ± 0.202168791919959	IV	6266306	6266326	+	21ur-5475	tbx-34;try-5;R02F2.7;Y74C10AL.2	Y74C10AL.2
21ur-5249	21ur-5249	4.79149	2.24657	0.00541795	0.0954157	Inf ± NaN	IV	15751404	15751424	+	21ur-5249	sid-3;let-767;sru-30;twk-8;xbp-1;C36B1.11;F21D5.6;K08E3.5;K09G1.2;tofu-4;R10F2.6;clec-125;lfi-1;egrh-3;F23D12.10;C29F3.7;K07D4.2;gip-2;B0261.9
21ur-12466	21ur-12466	-1.624	3.22822	0.00542818	0.0954157	0.301731085363568 ± 0.100520758261391	IV	9568544	9568564	+	21ur-12466	gei-3;ncr-2;sma-5;spd-1;str-84;C36E8.4;C46C2.2;M03C11.8;noca-1;srbc-45;arrd-15;efr-3;jmjd-3.1;F21D12.3;swip-10;snap-29;hira-1;srt-18;R05D3.12;T04D1.2;Y39G10AR.9;Y61A9LA.3;gck-2;F45D11.7
21ur-13078	21ur-13078	1.4034	4.14049	0.00544054	0.0954157	2.56680240048945 ± 0.434182627426278	IV	13825772	13825792	+	21ur-13078	egl-23;gei-17;gon-14;nhr-136;qua-1;rdy-2;spon-1;F55C9.6;T22C1.9;ZC376.3;ZK896.5;C37A2.8;F36H9.5;cla-1;M02B7.2
21ur-2307	21ur-2307	1.40333	4.14049	0.00545552	0.0954157	2.56680240048945 ± 0.434182627426278	IV	13825773	13825793	+	21ur-2307	egl-23;elt-3;gei-4;gei-17;lov-1;nhr-136;ptp-3;qua-1;unc-41;clec-147;C55A6.11;D1081.3;F10D11.2;F36H2.3;F55C9.6;him-18;T05C12.1;fbxa-2;T22C1.9;epg-6;Y48C3A.14;ZC376.3;ZK896.5;rpb-2;C37A2.8;twk-47;F36H9.5;tag-343;K02F6.4;T10E9.4;Y40A1A.3;Y73E7A.8;F49D11.10;C05B5.16
21ur-3449	21ur-3449	2.24813	3.0039	0.00558218	0.0968095	5.74501612823808 ± 0.88013561479266	IV	15955239	15955259	-	21ur-3449	daf-15;hot-7;nas-4;pqn-36;rnt-1;asd-2;mogs-1;ppfr-1;nphp-1;R10E4.1;samp-1;K04A8.1;T23E1.1;vps-24;ZK616.8;apb-3;clh-3;clx-1;gex-3;gfi-1;hmp-1;lea-1;nhr-64;nhr-104;osm-8;rsd-2;srv-22;srw-71;str-162;wah-1;C05D12.1;C27D8.3;vps-50;C47F8.7;acox-1.5;F20G2.5;mus-101;cfp-1;F59D12.1;lpin-1;JC8.2;K07F5.16;K10D6.4;nduo-2;R07A4.2;R102.2;T07A5.1;T09F3.4;T20D3.8;ola-1;nmy-3;snx-14;Y54G11A.7;srsx-25;Y69H2.9;ZK66…
21ur-12265	21ur-12265	1.30238	4.91922	0.00559143	0.0968095	2.46266729561607 ± 0.654600176399494	IV	5770668	5770688	+	21ur-12265	fut-4;madd-3;zak-1;gale-1;F23D12.1;F36A2.2;F55H2.5;M02G9.1;nhr-145;Y48E1C.4;ZK596.2;pks-1;F16G10.11;F44E2.6;fbxa-183;F47B7.4;fbxb-17;memb-2;R04B3.3;Y55H10A.2;ZK180.3;ttr-42
21ur-618	21ur-618	1.30237	4.91922	0.00559623	0.0968095	2.46266729561607 ± 0.654600176399494	IV	5770665	5770685	+	21ur-618	cey-1;chk-2;dpy-6;ggr-1;ndx-6;num-1;srx-58;tba-2;unc-63;vav-1;npr-6;erv-46;M04C3.2;M106.2;nhr-206;lyst-1;T25G3.4;T28C6.7;W04G5.4;ash-2;fbxa-209;snx-14;Y67H2A.10;ZK1098.2;C03B1.6;C05D10.4;lam-2;F32A5.4;F48C1.3;H14N18.4;T02G5.3;W03D8.1;Y4C6B.5;Y17G9B.8;hpo-29;Y71H2AM.3;Y92H12BL.1;dmsr-9;gcy-33;mgl-1;nhr-109;pqn-96;rig-3;acs-19;C53A5.13;mlcd-1;F36A2.2;F53C11.1;F54B3.1;M18.6;T13F3.6;T28A8.6;best-22;m…
21ur-2011	21ur-2011	1.62624	3.63425	0.00567353	0.097539	2.94506238602941 ± 0.45279542629006	IV	15506818	15506838	+	21ur-2011	bbs-2;dnj-12;gcy-17;ngp-1;ret-1;soc-2;twk-29;C46C2.3;F15D4.6;F22G12.3;T25B9.6;dkf-1;Y39B6A.33;faah-6;ZC373.5;B0212.3;math-9;aagr-1;ugt-36;polk-1;F25A2.1;rod-1;M57.1;R04A9.6;fbxa-71;clik-1;mltn-6;Y56A3A.41
21ur-4636	21ur-4636	-1.63136	3.22282	0.00578443	0.0985483	0.296600829210729 ± 0.0437017729587871	IV	13806857	13806877	-	21ur-4636	mtm-3;sax-7;lpr-5;B0207.5
	21ur-6134	-1.6403	3.02731	0.00590481	0.100427	0.269296320112192 ± 0.1213797887577	IV	5639820	5639840	+	21ur-6134	ceh-24;col-135;nhr-66;cpna-4;C06B8.7;F01G4.4;K07G5.5;D1044.6
	21ur-13184	-1.64034	3.02731	0.00591775	0.100493	0.269296320112192 ± 0.1213797887577	IV	5639821	5639841	+	21ur-13184	col-135;nhr-66;unc-89;cnnm-2;R08E5.3
	21ur-7800	-1.52914	3.8032	0.00597961	0.100773	0.352869603630128 ± 0.0476970891859979	IV	16157943	16157963	+	21ur-7800	cdc-25.4;C33A12.19;F55H12.3;T16H12.3;dkf-1;ugt-31
	21ur-7699	2.53621	3.08508	0.00600119	0.100984	6.56038518735124 ± 3.34003215884251	IV	15587021	15587041	-	21ur-7699	cas-1;dlg-1;hrp-2;hum-4;nhr-121;str-148;tor-2;C14B4.2;ugt-23;F15D3.4;pole-1;clec-31;K02E11.7;K03A11.5;blos-8;nrde-2;Y17G7B.8;Y59A8B.8;Y70C5B.1;mcp-1;C13A2.6;C25E10.11;acs-22;ccpp-1;cdk-2;gba-4;Y55B1BL.1;dpm-1;Y59A8B.25;T09E11.12;W06G6.21
	21ur-5160	-1.08346	4.73576	0.0061024	0.102394	0.458008623132495 ± 0.0366418982588329	IV	14348693	14348713	-	21ur-5160	aps-3;arf-1.2;arf-3;cdh-4;ist-1;sec-8;vap-1;C09F9.2;F54C9.11;grdn-1;cpna-2;F33E11.3;ceh-83;smcr-8;Y34D9A.3;ZK1053.7;lsy-12;C25G4.17	aps-3
	21ur-10932	-1.08346	4.73576	0.00610343	0.102394	0.458008623132495 ± 0.0366418982588329	IV	14348694	14348714	-	21ur-10932	cdh-4;nhr-126;sec-8;sms-3;vap-1;C25G4.2;F54C9.11;F54F12.1;haao-1;C04E12.5;cnnm-1;F10G7.9;F37C4.5;ceh-83;smcr-8;T20D4.3;T20D4.5;Y59C2A.1;ZC581.7;ZK1053.7;lsy-12
	21ur-4503	1.0017	6.03022	0.00614176	0.102576	2.00709086359586 ± 0.480810814040369	IV	15103103	15103123	+	21ur-4503	cnk-1;lgg-1;npp-6;sdc-3;ttr-21;obr-2;cyp-13B2;K09E9.3;M28.9;pro-3;C48E7.6;F23F1.6
	21ur-3883	-1.0987	4.27516	0.00624746	0.103619	0.441843864308315 ± 0.102982905161477	IV	13936940	13936960	+	21ur-3883	atl-1;col-154;frh-1;glh-3;gly-15;him-10;inx-17;let-502;lpd-3;lst-2;msp-59;oat-1;smf-3;srh-76;toh-1;unc-77;cpna-5;C07E3.3;C29A12.6;C33B4.5;C34C6.3;C38D4.7;clec-114;F11E6.8;F16B12.5;F35E12.2;hecw-1;F53B6.7;chil-17;npr-26;T05F1.2;nhr-26;T16A9.5;W02H3.1;Y26D4A.5;Y116A8C.30;ZK1098.11;B0303.11;math-7;C44B7.5;F13D11.4;F16B4.5;nep-6;cdh-8;F27D9.2;F28B4.1;F32A5.4;che-10;F36H12.17;sec-20;M151.3;R09F10.5;T1…
	21ur-12065	-1.09871	4.27516	0.0062511	0.103619	0.441843864308315 ± 0.102982905161477	IV	13936939	13936959	+	21ur-12065	mig-15;pak-1;pqe-1;twk-4;ocrl-1;D2045.7;F16B12.5;F16B12.7;sdhd-1;M03B6.3;fbxa-164;fbxa-165;E_BE45912.2;F22H10.1;aakg-4;zmp-6;pig-1;gba-4
	21ur-13299	1.72593	3.85282	0.00626973	0.103773	3.22159354550634 ± 0.600357028622366	IV	15829494	15829514	-	21ur-13299	egl-45;klp-20;lpd-3;stn-1;arrd-3;dhc-3;F01D4.5;nphp-4;Y116A8C.11;nhr-229;ZK637.4;B0524.6;exoc-7;M04F3.4;copb-1;nol-6;F31E3.12
	21ur-6337	-1.07913	4.41377	0.00629033	0.103959	0.46954560626362 ± 0.0746198307722795	IV	5713257	5713277	-	21ur-6337	lam-1;lig-4;snt-2;sym-4;cutl-27;F18A11.2;Y57A10A.5;C07H6.2;C30A5.10;M151.1;natc-1;Y59H11AM.4;exos-2;T08D10.5;C30A5.16;C53B4.4
	21ur-5559	2.42003	2.76512	0.0063701	0.104695	6.01876222546143 ± 1.06798550487954	IV	13900671	13900691	+	21ur-5559	bre-3;dgk-3;gly-20;gon-1;gpb-2;lpd-3;map-1;ifet-1;pars-1;ptr-13;qua-1;rab-14;scc-3;sdc-2;snf-9;srd-5;srh-85;sru-17;taf-1;tra-1;unc-24;unc-62;B0001.8;C11H1.2;mrps-22;syg-2;mrps-31;C34E11.2;F13G3.7;phlp-2;top-2;nduo-5;T01D3.3;T01G5.1;T23G5.2;T26C5.3;Y17G7B.8;attf-6;sre-18;ztf-22;lin-38;grdn-1;tag-273;Y57G11C.31;Y73F8A.5;Y75B8A.7;rbm-12;C02B8.6;cyp-35A1;C09D4.1;chil-11;C46H11.6;C52B11.5;pcyt-1;F08F1…
	21ur-4618	2.77946	2.44173	0.00638799	0.104695	9.6506615571838 ± 0.201459409109078	IV	14037140	14037160	+	21ur-4618	arf-6;cog-1;nas-30;oct-2;sqv-2;srd-23;srr-2;srv-4;tns-1;mrps-31;prp-4;clec-63;F45H10.5;F46G10.2;srz-42;chch-3;R02D5.1;ztf-6;dmd-3;afmd-2;Y46G5A.8;Y47D3A.14;sam-10;pinn-4;npr-34;Y81G3A.4;ZK287.9;trpp-12;C50F2.4;cyp-33C7;sulp-3;lin-42;F56E10.1;K06H7.1;pdf-1;sma-10;nhr-226;W09G12.9;mrpl-15;ZC190.4;srz-97;F21C10.17
	21ur-6104	1.15266	4.59874	0.006461	0.104773	2.20863622601369 ± 0.248617323628157	IV	16661371	16661391	-	21ur-6104	nas-23;nca-2;pqn-32;str-27;bud-31;cutl-27;F07C6.4;idhg-1;utx-1;T05A12.4;Y53G8AM.6;sre-34;haf-7;jtr-1;lea-1;str-163;str-166;acp-4;acs-12;mak-1;gpx-2;clec-226;R102.4;Y59A8B.21;sdha-1;C36B7.5;acdh-12;sre-39;daao-1;Y92H12A.4;Y97E10AR.4;Y55F3BL.4
	21ur-13746	1.15265	4.59874	0.00646698	0.104773	2.20863622601369 ± 0.248617323628157	IV	16661372	16661392	-	21ur-13746	flp-9;fzy-1;haf-7;lea-1;mab-20;mrp-1;mrp-2;myo-3;nhr-17;npp-10;npp-14;odd-2;snf-11;srg-60;str-163;str-166;try-5;vab-19;acs-12;F32B4.8;F45H10.2;vha-14;ensa-1;R102.4;rbm-25;Y59A8B.21;Y75B8A.19;Y106G6H.1;C05E11.3;fbxa-158;C32D5.7;tbck-1;C36B7.5;sre-39;F36H9.7;T08G2.2;T10H10.2;Y34D9A.3;Y46E12BR.1;daao-1;Y92H12A.4;Y55F3BL.4;T23F11.11
	21ur-7451	1.12652	4.66717	0.00654427	0.105182	2.15473868385548 ± 0.42892838190731	IV	15840671	15840691	-	21ur-7451	bli-4;par-4;parp-2;unc-8;jmjd-3.3;T16G1.4;bgal-1;let-611;ncbp-1;R155.4;Y92H12BR.3;mog-4;rde-4;F54D5.11;rde-12;T01G5.1;cdkr-3;cbs-1;F25E5.4;F48E8.3;R08C7.5
	21ur-13984	1.12649	4.66717	0.00655976	0.105279	2.15473868385548 ± 0.42892838190731	IV	15840672	15840692	-	21ur-13984	clc-4;cogc-2;hcp-6;irk-2;nhr-123;nhx-3;rde-4;sir-2.4;srh-48;srv-7;F23B12.7;F25H9.2;T01G5.1;ztf-22;dus-2;cdkr-3;cbs-1;B0432.9;C49H3.4;F32B5.7;arrd-18;F48E8.3;F55A12.5;F57C9.4;Y53G8AR.8;ZC196.3;F13E9.13;Y37A1A.4;T07H3.10
	21ur-9575	2.15846	3.23699	0.0065803	0.105456	4.69037208070081 ± 1.25671549441472	IV	16220819	16220839	+	21ur-9575	clh-1;dpy-20;hif-1;lin-56;ntl-4;prx-3;set-2;tag-38;ttn-1;trm-1;dhc-3;C31G12.4;prp-4;C44H9.4;C48D1.5;D1025.1;tag-314;M05B5.4;cyp-13A8;T11F9.12;Y47H10A.3;gpi-1;Y105C5A.8;nep-1;B0207.5;C03B1.6;npr-17;C07G3.8;C17H12.2;fln-2;C30E1.3;cyp-33C7;F41H10.3;H34I24.2;irld-45;clec-265;ttr-7;jmjc-1;bath-23;K11H12.11	C17H12.2
	21ur-8606	1.33528	4.08232	0.00660988	0.105593	2.4543457852952 ± 0.342726085476613	IV	14665595	14665615	+	21ur-8606	ncx-9;ptc-3;mmcm-1;C42C1.8;T27F7.12
	21ur-11880	1.64159	3.63972	0.00661736	0.105593	3.1705213807671 ± 0.811290727782273	IV	16526709	16526729	+	21ur-11880	arx-6;che-11;clh-4;dnj-20;eftu-2;nhr-31;nhr-100;pfn-2;pqn-85;rrf-3;srd-16;mttu-1;mlt-2;C05B5.5;C27A7.3;M199.7;Y45F10C.1;hpo-27;F54H12.4;fbxb-44;K09E3.6;R05D3.12;clec-175;T12E12.6;cil-7;fbxb-43;nhr-41;oaz-1
	21ur-7411	-2.5728	2.41643	0.00667417	0.106042	0.120739402851194 ± 0.0621327119644131	IV	15433345	15433365	+	21ur-7411	brc-1;cca-1;far-3;gcy-20;gob-1;gro-1;hcp-1;him-4;ina-1;mrp-6;mua-6;nsy-1;tank-1;rps-7;scd-1;wrt-3;glct-5;D1086.5;F20C5.7;drap-1;F42G10.1;cri-1;K08H10.6;T05F1.7;Y106G6A.4;bath-33;F21F3.4;F32E10.5;F44E2.7;F58F6.6;ogdh-1;ZC196.9;K05F1.13
	21ur-9604	-1.39357	3.09702	0.00680655	0.107071	0.320448706474697 ± 0.164171193047749	IV	16174414	16174434	+	21ur-9604	acr-2;btf-1;ceh-16;dig-1;dlk-1;dpy-8;dars-1;egl-27;emb-8;fer-1;glr-1;him-1;hsr-9;ida-1;let-4;let-526;lrp-1;mut-16;myo-3;nas-29;ncx-8;pef-1;parp-2;pqn-80;rbc-2;sri-34;srx-10;top-1;unc-22;unc-96;zip-1;mys-1;cpna-5;C02F4.4;gcy-29;sucl-1;C06C6.8;C18D1.2;slc-17.2;C39E9.11;com-1;C53B4.4;D1053.3;D1081.9;F07H5.7;F13B12.6;hxk-1;F23B2.10;F23B12.7;F33H2.6;mlcd-1;F36A2.9;F36G9.15;F44F1.6;hxk-2;M03B6.3;somi-1…
	21ur-10318	1.17268	4.78406	0.00686095	0.107106	2.25497373870293 ± 0.495208064130976	IV	15974494	15974514	+	21ur-10318	che-3;baz-2;gly-19;str-246;tre-1;F44E5.4;F44E5.5;F54E4.3;T01G5.1;T22C8.3;ZK1320.9;C05D9.3;C06E4.3;C16B8.2;C39D10.6;otpl-2;fbxb-11;otpl-5;F58E2.3;M70.5;T12A2.5;Y73B3A.4;ZC155.4;H06H21.11
	21ur-12919	2.03387	3.15724	0.00690514	0.107557	4.1372574557464 ± 0.526541867996212	IV	15604945	15604965	-	21ur-12919	cdh-4;dhs-17;dnj-19;hot-4;nhr-20;osm-5;rnt-1;srw-88;tre-5;vars-1;dmd-6;C27B7.7;D1086.8;chd-1;trcs-2;T15D6.5;ttr-17;Y17G7B.8;sinh-1;nuo-3;arrd-15;mct-2;ufl-1;pde-5;C44B7.12;C48E7.6;F18E9.3;F25E5.16;F37A4.3;F48C1.8;klf-1;K02E7.10;M02E1.1;R05C11.2;R12E2.1;mct-1;siah-1;Y45G5AM.2;Y55F3BR.2;Y60C6A.1;pinn-1
	21ur-330	1.01384	4.97323	0.00695241	0.108059	2.06886578336672 ± 0.301216683186516	IV	17235892	17235912	-	21ur-330	gcy-35;hot-4;ifg-1;mif-4;nas-32;pgp-6;pgp-7;rsd-2;spn-4;F21H7.2;srbc-76;cox-14;W02B8.1;hphd-1;Y39A1A.24;Y39B6A.30;Y39B6A.43;Y42A5A.1;nstp-5;fbxa-183;fncm-1;npl-4.1;npl-4.2;cyp-35A3;fbxa-86;Y38C1AA.6;thn-5;fln-1;trpp-10;zig-9;F54F7.14;asd-2;lsl-1;T19A6.4;dct-15;snx-14;AH9.3;doxa-1;C46E10.8;F39C12.1;nrde-3;T14B4.1;ZC123.4;fbxa-4
	21ur-6071	1.8609	3.05375	0.00695678	0.108059	3.9729682320989 ± 0.130568332404492	IV	17189847	17189867	-	21ur-6071	ceh-44;dys-1;gap-2;gly-14;mec-1;mars-1;srj-45;tig-2;unc-11;cyp-29A4;C15A11.4;rrbs-1;rnf-121;C39B10.1;lact-7;mec-19;D2045.8;clec-42;mfap-1;lgc-44;rpn-6.2;K02B7.3;K08H2.3;vglu-2;M03C11.8;M04C9.4;ctc-3;ctc-1;mrps-12;vps-53;T18D3.1;Y41C4A.9;Y51A2D.7;daf-38;irld-20;ZK512.2;ZK899.6;C06E4.3;C08A9.3;eif-2D;D1005.2;otpl-2;F08C6.5;F09F7.5;F27C1.2;F41C3.4;F54A3.2;spe-49;calu-1;M04G7.3;T22E5.1;W09C3.4;W10C8.…
	21ur-4498	3.37603	2.83875	0.00697289	0.108158	14.2570702792698 ± 9.62819502868259	IV	15302064	15302084	+	21ur-4498	asp-3;cah-6;dsl-2;haf-8;hil-5;jph-1;srj-27;str-222;nhr-154;C31E10.1;F45G2.8;F53A2.9;dph-3;lge-1;R10H10.7;W01B6.4;bath-34;atln-2;Y44F5A.1;Y51H4A.7;algn-7;ZK287.4;F23H11.4;F35F10.13;K08D9.2;gldc-1;F30A10.15
	21ur-4456	1.01557	5.05908	0.00705829	0.108824	2.02362818442128 ± 0.305584714476475	IV	15830113	15830133	+	21ur-4456	C13C12.2;R09D1.13;fbxa-89;C35D10.8;trk-1;ugt-36;F58E2.4;fbxa-66;H05L14.3
	21ur-10701	-2.28771	2.52292	0.00707321	0.108824	0.16321238571352 ± 0.120477364446521	IV	14131118	14131138	-	21ur-10701	ama-1;atm-1;ceh-36;cle-1;cyn-16;gpn-1;hum-6;mcm-6;str-35;syd-2;syp-1;unc-73;wnk-1;tufm-1;F15D3.4;clsp-1;R09E10.1;pges-2;glb-22;T13F2.2;T24B8.7;T27E7.3;Y48E1B.8;Y53F4B.7;Y53F4B.26;hpo-32;C09F5.1;C17H11.6;C25H3.1;set-4;fhod-1;F10E7.1;F13B9.1;F27C1.6;F33H12.6;cla-1;F48B9.3;F52G3.1;F59H6.5;R08F11.7;rbm-5;Y16E11A.2;hlh-33;Y43H11AL.1;Y46B2A.2;Y47D9A.3;eel-1;Y67D8C.7;Y73B6BL.31;ZK250.9
	21ur-8127	-2.28776	2.52292	0.00709857	0.10889	0.16321238571352 ± 0.120477364446521	IV	14131119	14131139	-	21ur-8127	ama-1;ccg-1;ceh-36;cyn-16;dig-1;fkb-5;gpn-1;mcm-6;msh-6;snf-10;jmjd-1.1;syd-2;ttn-1;mrck-1;unc-73;wnk-1;tufm-1;best-5;clsp-1;K03A11.4;nol-56;M03B6.4;R09E10.1;pges-2;glb-22;R31.2;T13F2.2;W08E3.2;Y53F4B.7;Y53F4B.26;C09F5.1;C17H11.6;C18H2.1;ubr-1;fhod-1;C54F6.12;F27C1.6;F33H12.6;F48B9.3;F59H6.5;T28D9.1;Y16E11A.2;Y43H11AL.1;Y46B2A.2;Y73B6BL.31;ZC8.6;ZK250.9;F40G9.18;C05B5.17
	21ur-1216	1.28969	4.56497	0.00723336	0.109515	2.37376540084912 ± 0.560259799287379	IV	16901600	16901620	+	21ur-1216	ceh-44;dys-1;gcy-9;kin-18;lin-46;sax-2;B0024.15;B0272.4;F14D7.6;gmps-1;nhr-37;lgc-50;Y65B4A.6;clp-6;dyf-2;gsy-1;nas-8;pqn-18;sel-11;srh-227;srh-228;srh-283;srh-284;srx-58;ttn-1;unc-73;vars-1;lgc-20;C15C8.6;C27B7.7;C33D9.6;smcl-1;fbxa-189;F54E12.2;srxa-2;prp-3;rbm-28;npax-3;hrde-2;irld-56;Y43D4A.5;tdpt-1;fbxa-126;Y73F8A.14;C26E6.12;C35D10.7;F53A10.2;H14N18.4;nstp-7;K09E3.6;igdb-3;T23B3.6;mgl-3;Y46…
	21ur-3924	-1.42517	3.65421	0.00725442	0.109515	0.360920514133135 ± 0.141656698823629	IV	14695110	14695130	-	21ur-3924	egl-23;F58E6.6;mam-3;Y43C5B.3;Y51A2D.1;egas-1;C15B12.2;C50F2.2;Y34D9A.7;F49B2.9
	21ur-9124	-1.61281	3.32253	0.00729672	0.109956	0.319180638162548 ± 0.0100726920058319	IV	13944812	13944832	+	21ur-9124	cdh-4;gei-1;prx-6;ret-1;sax-7;sru-25;taf-1;svh-1;C01A2.6;ahsa-1;C23H4.6;ztf-7;F53F4.7;clpf-1;F59B10.5;trpa-2;T09E11.9;T24B8.4;W04G3.5;dhc-4;W07G4.3;nkcc-1;tpst-1;tep-1;C06E1.1;ubr-1;nhr-260;fbxa-62;F25B5.3;F53A10.2;F55F10.1;K03A1.4;rga-3;lmtr-5;R148.5;thoc-1;W06B4.2;otub-2;Y55F3AM.9;fbxa-138;ZK616.1;srm-5;Y37A1A.4;dyc-1;swsn-4;rsr-1;B0393.3;F19C6.5;F44G4.1;pola-1;Y119C1B.5
	21ur-38	1.15653	7.70825	0.00734753	0.110571	2.23248129985615 ± 0.814846047422603	IV	16789030	16789050	+	21ur-38	nhr-13;F32D8.12;lgc-1;F32D8.11	nhr-13
	21ur-15361	-1.76926	3.02334	0.00742901	0.110717	0.301451578709673 ± 0.0696497854444458	IV	15063784	15063804	+	21ur-15361	NA	NA
	21ur-1436	-1.76925	3.02334	0.00743236	0.110717	0.301451578709673 ± 0.0696497854444458	IV	15063780	15063800	+	21ur-1436	mop-25.1
	21ur-9551	-1.86831	2.51375	0.00744321	0.110717	0.213611620002986 ± 0.113545414612619	IV	4944742	4944762	-	21ur-9551	cft-1;col-80;egl-2;fzo-1;ggr-2;kin-23;lig-1;mig-15;nhr-68;pod-2;F23D12.3;F49C12.15;droe-4;K01D12.9;ash-2;C49A9.1;C54G7.1;F41B4.2;M151.1;cdh-1;cec-8;Y82E9BR.18
	21ur-13794	-1.86831	2.51375	0.00744321	0.110717	0.213611620002986 ± 0.113545414612619	IV	4944743	4944763	-	21ur-13794	ggr-2;glr-2;ima-2;kin-23;mig-15;nhr-68;clsp-1;F49C12.15;K01D12.9;top-2;ash-2;asp-15;Y44A6D.3;ZC247.2;C49A9.1;C54G7.1;F07E5.9;F36D4.5;F37A4.4;F39H12.1;F48E8.4;M151.1;cdh-1;cec-8;Y82E9BR.18;ZC53.4;fbn-1;clec-25;M01A12.4
	21ur-2984	-1.13786	4.74	0.0076242	0.112566	0.462917387350841 ± 0.103424674104962	IV	5745366	5745386	+	21ur-2984	lgl-1
	21ur-1211	2.22782	3.01379	0.00763209	0.112566	4.60324029929788 ± 0.716827179980454	IV	15838174	15838194	+	21ur-1211	abt-1;nas-21;tra-3;C11H1.2;fbxa-88;oac-20;clec-1;F56H1.3
	21ur-9673	-1.04928	4.24045	0.00775056	0.113747	0.473621018773489 ± 0.0400657925260158	IV	6093203	6093223	+	21ur-9673	fbxc-44
	21ur-14443	-1.04928	4.24045	0.00775314	0.113747	0.473621018773489 ± 0.0400657925260158	IV	6093202	6093222	+	21ur-14443	fbxc-44;srt-16
	21ur-484	-4.74947	1.95673	0.0078429	0.114459	0 ± 0	IV	16039978	16039998	-	21ur-484	aha-1;anc-1;apr-1;csb-1;cul-3;daf-4;dhc-1;dnj-11;duo-1;hcp-4;hdl-1;him-4;hot-7;jph-1;klp-11;lgg-2;mes-1;nas-7;nhr-98;nhr-131;pes-8;pgl-1;pqn-15;pqn-85;san-1;srg-46;srh-146;stn-1;str-256;tkr-3;tgt-2;twk-13;wve-1;B0491.6;C17G1.5;lid-1;mrps-31;nfki-1;C34F6.10;pals-39;bgnt-1.1;F01D5.7;F02E9.10;F09B12.5;F10C2.3;F20D1.3;F21D5.3;F21G4.6;F26E4.3;gpx-1;fbxa-99;tat-5;sptf-1;F46B6.9;F53F1.3;capg-2;F58D5.5;f…
	21ur-2687	4.4494	2.10911	0.0078429	0.114459	Inf ± NaN	IV	16250693	16250713	-	21ur-2687	grl-5;kin-29;mua-3;pat-3;ketn-1;ptr-2;str-122;glb-11;nhr-288;Y54E5A.7;hach-1;F35H10.2;F46H5.4;Y4C6B.2;Y22D7AR.2	F46H5.4
	21ur-5283	1.59107	3.99012	0.00796439	0.115323	3.03624369243552 ± 0.817632033705369	IV	15566414	15566434	+	21ur-5283	gop-1;sec-5;sru-27;str-43;tax-6;F10B5.2;F59B2.3;M01F1.9;R08B4.4;gpcp-2;T11F9.1;Y16B4A.2;fbxa-216;impt-1;Y75B8A.10;B0361.2;C01G5.4;C04E7.1;C24H12.1;C52A10.2;farl-11;sgt-1;srbc-37;ZK353.9;ZK1248.5
	21ur-1348	-1.30846	3.64347	0.00803757	0.115766	0.381332162782762 ± 0.0727664609171374	IV	15363378	15363398	+	21ur-1348	srh-88;R10E8.1
	21ur-13500	-1.30847	3.64347	0.00804356	0.115766	0.381332162782762 ± 0.0727664609171374	IV	15363375	15363395	+	21ur-13500	acr-11;ncs-3;str-39;str-44;C10C6.7;cyp-31A2;dcn-1;T07C4.3;nep-23;lam-2
	21ur-10409	-1.55717	2.99454	0.00805033	0.115766	0.291492264439119 ± 0.191660588334379	IV	5976190	5976210	+	21ur-10409	dpy-27;gpa-8;srx-129;C30F2.2;gadr-2;srbc-63;clec-212;F53G2.2;R11G1.1;T08B2.4;Y47G6A.15;C29E4.15
	21ur-6362	-1.18644	5.37165	0.00812452	0.11625	0.432553265919325 ± 0.16136899156229	IV	15956361	15956381	-	21ur-6362	let-765;srd-51;tag-77;C09H10.9;F19H8.2;srab-17;Y6D1A.1;attf-6;C04G6.6;C10G8.8;tag-294;T03D3.5;ZC196.4
	21ur-4280	-1.00699	4.94119	0.00813068	0.11625	0.486306485044383 ± 0.0416479710324622	IV	5075442	5075462	+	21ur-4280	ceh-39;acp-3;dct-5;symk-1;K09F6.4
	21ur-5348	1.18873	4.14522	0.00815558	0.11625	2.34083056024837 ± 0.185674787727535	IV	16214391	16214411	-	21ur-5348	che-3;daf-15;dnc-1;klp-4;mek-2;pad-1;pgp-14;pvf-1;sri-54;sdz-8;bgnt-1.3;R11D1.7;rpom-1;sql-1;cyp-33A1;C18C4.7;uri-1;ppfr-2;F58H7.5;H43I07.3;wapl-1;R11E3.2;moa-1;T23B3.1;W05H9.4;unc-132;Y54F10AR.1;Y95B8A.4;Y110A2AR.1;C49C8.8;rbf-1
	21ur-6991	1.18874	4.14522	0.00815789	0.11625	2.34083056024837 ± 0.185674787727535	IV	16214387	16214407	-	21ur-6991	clu-1;eral-1;F11C1.5;lips-10;srbc-9;lips-11;lips-13;Y38C1AA.1
	21ur-5977	-1.31592	3.8337	0.00816582	0.11625	0.400693059045512 ± 0.140254363192773	IV	13630323	13630343	-	21ur-5977	rgs-7;tax-2;F02H6.2;clec-55;K01G12.3;abce-1;Y51H4A.8;B0228.9;nhr-173;M02D8.3
	21ur-10454	-1.31592	3.8337	0.00816813	0.11625	0.400693059045512 ± 0.140254363192773	IV	13630322	13630342	-	21ur-10454	aph-2;tax-2;R09H10.5;abce-1;nhr-173
	21ur-10635	1.51756	3.5695	0.00817494	0.11625	2.94067249838333 ± 0.354174751261251	IV	15165778	15165798	+	21ur-10635	cup-5;daf-10;evl-14;gcy-5;pdi-3;srd-54;tra-2;zif-1;hrde-1;C49C3.4;mig-32;nhr-27;F36G9.13;fbxa-192;K07A12.4;T11A5.6;B0310.6;C46A5.4;C55B7.11;F26D11.1;cyp-33C6;F53F10.2;K07B1.7;T05A8.2;T08B6.9;trd-1;ZK721.4;F32H2.12;K09C8.9
	21ur-8611	1.67024	3.33483	0.00819559	0.116394	3.3111090533442 ± 0.280586595716892	IV	14857682	14857702	+	21ur-8611	aex-3;cdh-4;emb-9;ggr-3;mel-32;mup-4;ptr-2;sli-1;suf-1;unc-40;C11H1.5;fbxb-65;C50F4.1;ugt-44;F13D2.1;tag-314;tag-290;clec-32;fbxa-69;capg-2;M03B6.3;T25B9.4;T26H8.4;Y46G5A.35;clec-194;nep-1;fbxb-70;hsp-110;C33E10.8;fbxb-88;F26G1.1;H18N23.2;T05C3.6;jhdm-1;Y54E10BR.2;fbxa-75;ZK546.5;Y2H9A.6;F55C12.19
	21ur-5200	1.75792	3.40388	0.00832566	0.117841	3.40276911892047 ± 0.509350473047324	IV	14943876	14943896	-	21ur-5200	gar-2;hif-1;mac-1;mig-15;nlp-8;nlp-27;sas-4;clec-225;C05G5.5;decr-1.3;mam-5;C04E7.4;F54D12.8;math-42;T20D4.15;ZK563.7;W03G9.10
	21ur-2898	1.75791	3.40388	0.00832931	0.117841	3.40276911892047 ± 0.509350473047324	IV	14943873	14943893	-	21ur-2898	acy-2;mac-1;npp-6;sel-7;snf-7;vit-3;vit-4;vit-5;fic-1;B0432.10;nhr-155;C23H3.5;msd-4;F22B7.3;T03G6.3;srz-3
	21ur-5123	1.42915	3.86875	0.00843389	0.119169	2.64565944344248 ± 0.467133232750186	IV	5286042	5286062	+	21ur-5123	par-1;wrt-3;xtr-2;gcp-2.2;idh-1;K08C9.6;Y47H10A.4;Y73F8A.5;C10G8.8;pks-1;F23H11.4;F25E5.1;rmh-1;M04F3.5;T06D4.1;sfxn-5;K08C9.9
	21ur-721	1.07978	5.14313	0.00847608	0.119252	2.12562911565526 ± 0.348917216559365	IV	15955589	15955609	-	21ur-721	fkb-4;ubc-24;C18E9.8;otub-1;F58D12.3;mnk-1;Y53C10A.5;C49G7.10;F36D1.12
	21ur-3256	-3.4292	2.16282	0.0085545	0.119386	0.0564816393471562 ± 0.0529017234987762	IV	4835578	4835598	-	21ur-3256	cdf-1;ire-1;kgb-1;mrp-4;srx-125;F49H6.5;F52A8.3;clec-161;K10D6.2;M01F1.9;T23B5.3;ZK550.4;C06E7.2;C41D11.3;acdh-9
	21ur-9333	1.57486	3.60545	0.00855942	0.119386	2.90582014634818 ± 0.26040245806818	IV	15581447	15581467	+	21ur-9333	apn-1;apa-2;cars-1;dars-2;gcy-20;kat-1;lim-6;mab-5;nhr-120;nhx-1;nhx-9;str-74;tra-2;twk-24;ucp-4;dhc-3;thoc-7;C03E10.1;srz-15;F21D5.3;K05C4.9;anp-1;T09B9.5;T24D5.2;sdha-1;C09B8.5;C09E8.1;mrps-18C;C56E6.4;D1037.1;nol-10;set-11;F36F12.7;F45E1.1;H20J04.4;K06A5.1;attf-5;Y69A2AR.19;cpx-1;lipl-5;bus-8;smg-3;fshr-1;K09A11.1;ZK1307.1;B0545.4;C13E3.1;C14B9.8;C23H3.5;R04B3.1;CD4.11
	21ur-8937	1.02148	4.9227	0.00857582	0.119386	1.98533103257636 ± 0.242996134390815	IV	15387750	15387770	-	21ur-8937	aat-1;dys-1;gst-16;hum-4;itx-1;nos-1;zyg-9;fbxa-174;agl-1;fcd-2;ddl-2;snx-14;Y54E5B.2;ZK849.1;C04C3.6;Y48G1A.1;Y82E9BR.16
	21ur-14654	1.02148	4.9227	0.00857708	0.119386	1.98533103257636 ± 0.242996134390815	IV	15387752	15387772	-	21ur-14654	aat-1;eat-16;fem-1;inx-5;map-2;zig-2;zyg-9;C08F8.2;oac-5;C33D9.6;C50F4.16;cyp-13A11;F46C5.6;F49H6.5;F53F8.5;agl-1;ZK1067.2;C16C8.12;abhd-3.2;C46C11.2;F53H1.4;hmbx-1;K02E7.4;R03E9.2;T23B3.1;Y22D7AR.6;Y34D9A.3;Y46H3A.4;supr-1;Y73C8C.8;Y92H12A.4;C55C3.8;pals-37
	21ur-913	1.02148	4.9227	0.00857828	0.119386	1.98533103257636 ± 0.242996134390815	IV	15387749	15387769	-	21ur-913	qars-1;grd-2;grd-4;ooc-5;str-154;rsa-1;C25F9.2;F10A3.4;F39H11.1;magu-4;T24B8.7;sfxn-1.3;C01B10.8;F09G2.1;F12E12.2;F41C6.4;str-267;ugt-53;W09C3.7;Y53G8AR.1;Y54G2A.26;rbm-39;fbxa-28;gst-16;F49H6.5;agl-1;T28A8.3;abce-1;snx-14;Y57A10A.4;ZK849.1;F37C4.4;Y92H12A.5;C34C6.9
	21ur-2354	1.00404	4.65976	0.00863032	0.11981	2.06597435389943 ± 0.101385255828226	IV	6054944	6054964	+	21ur-2354	aex-1;air-1;gna-2;hmg-3;let-268;let-607;nhr-1;nmy-2;pdk-1;snf-2;spt-5;srh-257;taf-3;bath-47;tbx-32;twk-18;unc-68;B0024.11;C15C6.3;kcnl-4;F28F8.7;capg-1;F30A10.3;tat-5;F56D5.9;H40L08.3;K12D12.5;clip-1;M04B2.4;R07E5.6;R102.10;T09E11.6;snt-7;W04A4.5;dhc-4;C06A8.8;glb-10;zhit-1;sec-6;nhr-177;clec-1;nhr-143;R155.3;T07H6.1;cec-6;pign-1;Y73B3A.13;lfi-1;ZK354.3;hipr-1;fbxc-27
	21ur-6915	2.4134	2.7542	0.00879209	0.121176	6.20878241298128 ± 0.612977570170684	IV	15854682	15854702	+	21ur-6915	alg-1;alg-2;asp-5;dpy-22;klp-13;lev-10;rpm-1;smg-3;tag-63;rhgf-2;tag-180;pezo-1;scl-5;F13B12.6;pals-1;F26H9.2;F34H10.3;argk-1;K01D12.1;lgc-18;sptf-2;ZC376.3;B0495.5;F07B7.12;F07C3.3;F20D6.10;F32E10.8;F43C11.6;H20E11.3;atg-2;D1086.18	F13B12.6
	21ur-616	1.16784	5.34209	0.00883418	0.121176	2.27921139355959 ± 0.415630060290906	IV	14527703	14527723	-	21ur-616	smc-3;ttn-1;ugt-65;Y67A10A.3;acs-5;Y106G6D.2;elpc-2;ZC84.6;C06G1.1;T08E11.8;T19D12.10;T07H3.10;atl-1;fat-4;nrde-4;let-413;srw-127;C55A1.1;F37D6.4;M04D8.4;R05H5.3;oac-56;del-7;abch-1;F55D10.4;K10B4.1;oac-40;T10D4.6;syx-18;usp-5;Y47G6A.5;cpsf-1
	21ur-3029	1.16785	5.34209	0.00883853	0.121176	2.27921139355959 ± 0.415630060290906	IV	14527700	14527720	-	21ur-3029	eor-1;ptr-21;smg-2;srx-2;vit-6;C53D6.6;gadr-6;F53C11.5;pges-2;Y48E1C.4;ZC247.1;set-19;cpsf-1;fbxa-224
	21ur-5795	-1.14135	4.33971	0.00886202	0.121176	0.454368326488776 ± 0.0872325393022732	IV	14124699	14124719	-	21ur-5795	cpz-2;ugt-22;T11G6.5;W04D2.4;nhr-186
	21ur-7628	-1.14135	4.33971	0.00886935	0.121176	0.454368326488776 ± 0.0872325393022732	IV	14124700	14124720	-	21ur-7628	aat-3;hpr-17;hsp-4;gcc-1;sbp-1;ugt-22;ril-2;F35E12.9;T11G6.5;W04D2.4;Y94H6A.5	gcc-1
	21ur-10419	-1.14135	4.33971	0.00887085	0.121176	0.454368326488776 ± 0.0872325393022732	IV	14124702	14124722	-	21ur-10419	nrde-4;hum-2;jtr-1;nsf-1;B0334.3;C06A1.3;nyn-1;samp-1;Y45F10D.10;B0207.5;C18G1.8;igcm-1;F43H9.3;F52H2.6;F56C11.6;sulp-6
	21ur-9923	1.93894	3.09363	0.00887507	0.121176	4.07659107420228 ± 0.815758585640137	IV	15725714	15725734	+	21ur-9923	alg-2;cal-4;nlp-31;cyp-35D1;F54D1.1;ttm-1;Y57G11C.31;B0507.1;C15B12.8;zgpa-1;F55F10.1;rpac-40;C33D9.13
	21ur-3976	1.5582	3.43839	0.00887508	0.121176	3.09879515567901 ± 0.522378516313801	IV	15777728	15777748	+	21ur-3976	ctb-1;sra-1;twk-22;prmn-1;cup-14;sinh-1;C08F1.6;sucl-2;spsb-1
	21ur-3729	2.10298	3.46678	0.00890686	0.121176	4.25239637531122 ± 1.65199668810912	IV	14433171	14433191	-	21ur-3729	col-187;haf-6;hcp-6;lin-45;lrp-1;mig-1;paf-1;pqn-82;rpc-1;srw-48;srx-74;twk-29;unc-53;C08F8.2;pezo-1;acp-3;F46B6.4;K11D2.4;M176.10;fbxa-104;Y45F10D.7;ZK287.7;C16D9.4;ift-74;C33G8.13;zgpa-1;C42C1.8;abhd-3.2;atic-1;F54D12.9;R03H10.5;R119.5;T09D3.3;immt-1;T20F5.6;Y22D7AL.6;tald-1;Y40A1A.2;trpp-10;fbxa-63;K11H12.11;C38C3.10	C08F8.2
	21ur-10213	-1.34256	3.4546	0.00892015	0.121176	0.360948805661928 ± 0.104572627746573	IV	9307955	9307975	-	21ur-10213	bbs-2;csp-2;dhs-22;egl-8;flp-14;grl-16;hcp-2;myo-1;mca-1;mcm-6;nhr-89;prx-11;rme-1;sri-29;ttn-1;unc-44;unc-46;arrd-25;ocrl-1;fbxa-171;irld-2;papl-1;F22G12.3;rict-1;mlcd-1;F49E11.7;K01D12.15;M153.2;T01C3.11;T11F9.7;T22C1.5;chhy-1;W07G4.3;Y38H6C.21;Y39B6A.41;hrpu-1;rpoa-1;gad-3;clec-117;B0563.7;C03F11.2;mlt-10;kca-1;EEED8.15;F07F6.2;F10G2.1;ttr-37;F35F10.14;agr-1;cysl-4;H06I04.3;strm-1;ipla-5;trm-2…
	21ur-7793	2.43377	2.70332	0.00892099	0.121176	7.04569272606355 ± 3.00180650961403	IV	15764284	15764304	+	21ur-7793	klp-4;ptp-1;pxf-1;nlp-59;M18.3;cyp-34A9;F19G12.2;F28F5.4
	21ur-9561	2.43384	2.70332	0.00892898	0.121176	7.04569272606355 ± 3.00180650961403	IV	15764283	15764303	+	21ur-9561	nhr-127;pgp-1;ptp-1;pxf-1;nlp-59;R05H10.7;C14C11.4;C14F11.7;F15E6.5;lin-42;F28F5.4;asp-19;T02C12.5
	21ur-14551	-1.32243	3.68258	0.00893018	0.121176	0.414884592530654 ± 0.101826932829212	IV	6408692	6408712	+	21ur-14551	rol-3
	21ur-11110	-1.26178	4.02879	0.00894516	0.121176	0.393555158149074 ± 0.0967687882417137	IV	6834354	6834374	+	21ur-11110	ccr-4;crh-1;npp-19;nrf-6;rpt-3;rsp-5;srd-42;C11H1.7;C25F9.9;oac-8;F13H10.3;uggt-2;ctf-18;irld-47;oac-42;tat-3;srz-85;inst-1;C28H8.3;C55C3.1;D1007.8;F10D2.10;ncbp-1;mks-1;ckr-1;srt-62;rep-1;C49G7.12
	21ur-14253	-1.26178	4.02879	0.00894608	0.121176	0.393555158149074 ± 0.0967687882417137	IV	6834353	6834373	+	21ur-14253	aat-7;air-1;chs-2;clh-2;dao-5;glh-1;glt-5;gly-6;gon-2;mab-10;nas-4;pod-2;rpt-3;srd-42;srh-272;srr-1;srw-79;srw-143;nck-1;unc-78;BE10.4;C34E11.2;F13H10.3;tbcd-1;uggt-2;F34H10.3;F53F4.4;amph-1;ctf-18;nduo-4;T05C12.4;ostb-1;cyp-13A2;rsa-2;Y116A8C.9;C03G6.17;C04C3.6;inst-1;C12D12.1;srb-15;let-611;C55C3.1;F10D2.10;ilys-5;vpr-1;mks-1;Y37E11B.2;rep-1;Y69A2AR.31;C49G7.12;F19G12.9;C02H6.3;F11G11.15
	21ur-8175	-1.26179	4.02879	0.00894911	0.121176	0.393555158149074 ± 0.0967687882417137	IV	6834357	6834377	+	21ur-8175	ham-1;srd-2;sup-10;sre-38;cyp-37B1;T14G8.3;nrps-1;mtq-2;F21C10.9;hrg-1;Y27F2A.11;dpf-3;far-5;gei-1;grl-21;hsp-25;mab-3;pqn-41;rps-5;srx-10;sym-4;wee-1.1;crm-1;B0457.6;C15C6.1;C34F6.10;F13H10.5;F33H2.2;F36A2.3;F46B6.2;F55G11.10;amph-1;ctf-18;T05F1.11;csnk-1;vps-33.1;cdc-26;srt-1;toe-2;F08F8.7;F44A2.5;K02E10.7;frpr-14;T22D1.5;srt-2;ZC449.5;R144.12;W09G12.10;C45B11.6;D2089.8
	21ur-2450	-1.32236	3.68258	0.00895779	0.121176	0.414884592530654 ± 0.101826932829212	IV	6408693	6408713	+	21ur-2450	cla-1;F35E12.2
	21ur-9748	-4.79927	1.96437	0.00904616	0.121819	0 ± 0	IV	14487473	14487493	+	21ur-9748	abt-2;cls-2;nhr-67;nsy-1;pgp-5;snf-1;vps-34;C14A6.3;C18B12.4;C48B4.13;F19H6.3;F54E12.2;T16H12.1;snrp-200;B0034.1;pacs-1;nol-10;clec-19;K10C2.7;pqn-52;M60.4;T26A5.2;kvs-5
	21ur-2259	1.39786	4.04463	0.00904923	0.121819	2.61665101560593 ± 0.534372993111506	IV	15834575	15834595	+	21ur-2259	aex-1;fsn-1;grp-1;mel-11;mix-1;mtm-6;nas-5;nhr-14;psr-1;rrf-2;sox-3;sri-4;abcx-1;tsp-11;unc-78;wht-2;C14C10.5;C40H1.8;mam-2;F16B12.5;ent-6;F57G12.1;cyp-13A8;T28B8.3;srt-11;Y18D10A.11;Y70G10A.2;C10A4.7;fln-2;acer-1;E04F6.10;F08F8.6;sorf-2;F59B1.10;K09F6.9;T13C5.7;W03F11.4;Y32H12A.8;Y48G1C.5;Y52E8A.3;trpp-10;Y73B6BL.22;W04G5.16;F52D2.12
	21ur-10794	1.54086	3.56672	0.00943228	0.125275	3.05552940349094 ± 0.60609093035763	IV	16573443	16573463	+	21ur-10794	gur-5;suca-1;jmjd-3.1
	21ur-2131	1.813	3.01829	0.00949997	0.125275	4.05233301018195 ± 0.108777394544823	IV	14590598	14590618	+	21ur-2131	aps-1;ceh-10;cul-6;dys-1;ech-2;frm-5.1;gar-2;gpd-2;kvs-1;mec-17;mig-10;mpk-1;nhr-115;nhr-128;pyc-1;rde-4;srr-8;srv-26;srw-53;hdl-2;B0395.3;erg-28;pyp-1;scav-4;nhr-27;K03H1.5;ctf-18;Y6B3B.3;fbxb-7;bath-33;rpb-2;pals-24;ets-9;fbxb-96;uri-1;E02D9.1;F19G12.2;F39C12.1;bath-7;bath-2;F52H2.1;bath-21;H05C05.2;K09E2.2;K12C11.1;nhr-202;T05A8.2;Y38A10A.2;frm-5.2;cct-8;fard-1;srt-53;irld-66;ZK1055.7;ZK1193.2…	aps-1
	21ur-3941	-1.8894	2.94454	0.00950138	0.125275	0.249332707184278 ± 0.0133090366595048	IV	16077023	16077043	+	21ur-3941	sre-38;F59A3.2;M02E1.1;Y77E11A.8
	21ur-9334	-1.01832	5.03623	0.00969581	0.126651	0.478913648971463 ± 0.120346243773125	IV	5382060	5382080	-	21ur-9334	C18D4.4;F41H10.2
	21ur-4291	1.86019	3.24759	0.00970463	0.126651	4.02788844394633 ± 1.27972681794181	IV	15477247	15477267	+	21ur-4291	acr-9;kin-29;mup-2;srh-184;srw-117;str-168;tsr-1;C23H4.4;E02H1.6;F40F12.7;K08E7.8;ugt-62;ctc-1;ttr-53;T19A6.1;Y39A1A.21;Y47D3A.21;sinh-1;Y57G11A.4;Y73F8A.35;C24A11.5;C45E5.1;C46G7.2;dgk-5;sna-1;dot-1.1;frpr-19;Y50D4B.7;Y58A7A.1;tag-229;T10E9.14
	21ur-3864	1.28687	4.22404	0.00976427	0.127279	2.42345166121019 ± 0.240035782670027	IV	5139765	5139785	-	21ur-3864	dhs-7;F57C9.6;C10A4.9;eat-6;str-86;F13B12.7;F40G12.11;ate-1;btb-9;szy-4
	21ur-12377	1.64324	3.78753	0.00988432	0.128693	3.12508269268731 ± 1.0225804049209	IV	14722146	14722166	+	21ur-12377	cln-3.1;gon-14;nas-21;nhr-84;srx-104;F55G11.8;W04A4.5;Y73F8A.23;Y113G7B.12;clec-195;maco-1;F10E9.4;srt-54;T10D4.1;T16A1.2;Y14H12B.1;Y32H12A.8;dmsr-11
	21ur-2865	1.09151	5.73356	0.0099493	0.129241	2.13665449362797 ± 0.356784812680808	IV	13996609	13996629	-	21ur-2865	cup-4;dog-1;grk-1;msp-78;wts-1;oxa-1;F25D7.5;cyp-13A1;nhr-147;C08G5.6;F46F11.1;lmd-3;sec-22;F56F11.4;Y60C6A.1;cyn-4;glh-4;lrp-2;nex-2;osm-11;sdc-2;sri-32;srr-6;unc-69;mdt-8;nfx-1;dhc-3;C17G1.2;rad-26;C34D1.4;tkt-1;plpp-1.3;phf-34;mus-101;clec-169;myo-6;ztf-7;eak-4;F54C8.4;ate-1;mrps-15;T06G6.5;T26G10.1;snpc-1.2;ZC247.1;cyp-34A6;B0303.4;C03H5.4;C05D11.9;spas-1;cht-3;imp-3;hpo-27;eri-6;C49A9.2;C50C…	spas-1
	21ur-13311	1.09151	5.73356	0.00996463	0.129241	2.13665449362797 ± 0.356784812680808	IV	13996608	13996628	-	21ur-13311	ceh-44;glp-1;hsp-3;nhr-34;srd-70;str-260;unc-69;dhc-3;C34D1.4;gasr-8;tkt-1;plpp-1.3;clec-169;K01G5.5;ate-1;M01G12.2;M01G12.5;R186.3;T06G6.5;snpc-1.2;Y75B8A.13;ZC247.1;gdh-1;B0303.4;C05D11.9;spas-1;C38C3.6;C50C3.2;C53A3.1;D2024.4;frpr-6;pgal-1;igeg-1;kcc-3;ferl-1;T12A2.1;T28D9.4;srsx-16;C47E8.11;F15D3.9;K09F6.15	spas-1
	21ur-4992	1.04982	4.72552	0.00997707	0.129241	2.01134579260145 ± 0.202801820031608	IV	15989190	15989210	+	21ur-4992	gly-4;lys-3;rpn-1;hrg-4;kmo-2;R10H10.3;F22F4.1;agr-1;Y71H2AM.1;nhr-41
	21ur-2355	1.09772	4.47964	0.00998456	0.129241	2.09915919032539 ± 0.35620969123563	IV	15867089	15867109	-	21ur-2355	pqn-88;syd-2;tor-1;unc-2;unc-26;wht-6;dhhc-7;F47B10.5;smc-6;K11B4.1;gss-1;T07C4.3;Y32B12B.4;rga-2;B0238.7;C01G5.4;bath-19;K11H12.4;clec-53;Y71F9AL.7	smc-6

## Sheet: comparison 9
piRNA	logFC	logCPM	PValue	FDR	fc_sem_basedOnpseudo.counts	chr	startPos	endPos	strand	ID	Targets	Clash Supported Targets
21ur-2652	-1.49411	4.74376	0.00218911	1	0.345152045811834 ± 0.0581511057478791	IV	5034365	5034385	+	21ur-2652	dnj-28;srw-137;srw-138;swsn-7;C23H4.7;C50B6.7;nhr-198;K07A12.5;T28D6.5;tcc-1;Y116F11B.7;D1007.8;F35H10.10;F55F10.1;W06A11.4
21ur-11546	-3.50068	2.88302	0.00376778	1	0.0509785238104995 ± 0.0500985983890363	IV	6892386	6892406	+	21ur-11546	rib-2
21ur-7961	3.26586	2.90281	0.00378549	1	15.1389655688051 ± 3.11091486622978	IV	5407157	5407177	-	21ur-7961	chil-6;H04D03.4;K08F9.1;mrps-18C;npr-22
21ur-5153	-1.45526	4.9409	0.00461608	1	0.355345133699152 ± 0.0668441595223888	IV	5723096	5723116	-	21ur-5153	dat-1;kal-1;kin-30;puf-9;C29F3.3;F43D9.1;K08C9.6;mrpl-16;npp-25;Y39C12A.9;sas-1;C25H3.8;F20D6.10;F25E5.8;sulp-3;drd-50;F59E11.7;pfd-2;R03G5.6;Y41D4B.11;zipt-7.1
21ur-4386	-1.54864	4.69829	0.00596725	1	0.344415817936521 ± 0.120203314254724	IV	5438626	5438646	-	21ur-4386	cnb-1;prp-8;cutl-3;hecw-1;F53E4.1;R07E5.4;cdf-2;wht-1;actl-1;tbck-1;praf-3;F43C9.1;suco-1
21ur-4563	-1.31172	5.04666	0.00630387	1	0.396897082242386 ± 0.054546960555063	IV	5583665	5583685	-	21ur-4563	nhr-99;clec-166;hipr-1;bus-8;daf-2;gar-3;gpa-3;mrp-5;pgp-8;sax-2;ocrl-1;nstp-9;Y32B12C.3;Y45F10D.7;C16E9.1;coel-1;srz-24;F36A4.2;btb-7;sorf-2;K08D10.10;oac-40;ZK112.6;F22D6.8;C17E4.20
21ur-9046	3.28566	2.91819	0.0066666	1	13.5864749546577 ± 4.9000807388082	IV	16040957	16040977	+	21ur-9046	lrx-1;pry-1;srd-7;srd-12;srh-68;tlk-1;2RSSE.1;C33G3.6;xbx-6;K05C4.2;ipla-7;ZK632.12;F56C9.3;srt-54;Y97E10B.1;Y53F4B.62
21ur-8909	-1.14754	6.08624	0.00761485	1	0.446926856962546 ± 0.0578101616464088	IV	6145346	6145366	-	21ur-8909	C36E8.1
21ur-6394	-1.25086	5.71551	0.00761537	1	0.410444766518244 ± 0.0090707753957362	IV	6639355	6639375	-	21ur-6394	lin-12;mex-6;srh-218;skpo-1;W06D11.2;Y47H9C.1;B0207.1;tyr-1;T13F3.8
21ur-5986	-1.14755	6.08624	0.00763472	1	0.446926856962546 ± 0.0578101616464088	IV	6145349	6145369	-	21ur-5986	mnp-1
21ur-15461	4.56943	2.54852	0.0078886	1	24862195421660412 ± 3884529828637250	IV	16173739	16173759	+	21ur-15461	F20C5.4;F30H5.3;nlp-71
21ur-501	4.56943	2.54852	0.0078886	1	24862195421660412 ± 3884529828637250	IV	16173742	16173762	+	21ur-501	R02F2.1
21ur-2079	1.53788	3.87239	0.00793726	1	3.40854837395367 ± 0.089486144279739	IV	14930583	14930603	+	21ur-2079	faah-6;T08E11.8
21ur-2262	-1.54611	5.05388	0.00918498	1	0.334168425185192 ± 0.0780524816929331	IV	6164139	6164159	-	21ur-2262	Y55B1BL.1
21ur-11313	-1.30096	4.69221	0.00951415	1	0.403234479804405 ± 0.0178637244386621	IV	6433179	6433199	+	21ur-11313	bli-4;F37A8.2;agxt-1;C01F1.3;C07H6.4;F56D2.5;Y51F10.4;pals-40;irld-63
21ur-1528	1.26845	5.1284	0.00952288	1	2.46658536582276 ± 0.3589092298283	IV	15629441	15629461	-	21ur-1528	let-526;pfn-2;rpl-42;sph-1;sra-13;srh-235;vav-1;C27B7.9;C38C6.5;phf-34;Y17G7B.8;Y47H9C.8;C03G6.17;srab-3;C09E7.8;F44A2.3;K06H6.1;T28A11.17;Y48G1BR.1;rbm-42;B0403.6

[truncated: 4 more sheets: comparison 10, comparison 11, comparison 12, comparison 13]
